# Supplementary material for: Osthole Induces Apoptosis and Caspase‐3/GSDME‐Dependent Pyroptosis via NQO1‐Mediated ROS Generation in HeLa Cells
Source: Hindawi journal article supplement (doi:10.1155/2022/8585598), 2022-01-01
Supplement: f1 [file 8585598.f1.zip]

| Protein IDs | Gene Name | Fasta headers | Number of proteins | Peptide size | Razor + unique peptides | Uniqueness | Sequence coverage | Mol. weight [kDa] | LFQ intensity N1 | LFQ intensity N2 | LFQ intensity N3 | LFQ intensity O1 | LFQ intensity O2 | LFQ intensity O3 |
|-------------|-----------|---------------|--------------------|--------------|-------------------------|------------|-------------------|-------------------|------------------|------------------|------------------|------------------|------------------|------------------|
| sp A0A024   | NUDT4B    | sp A0A024     | 2                  | 4            | 4                       | 3          | 32                | 20.434            | 1271400000       | 0                | 0                | 0                | 1464500000       | 1533600000       |
| sp Q9Y53    | PPIAL4A   | sp Q9Y53      | 5                  | 3            | 1                       | 1          | 29                | 18.182            | 0                | 0                | 0                | 0                | 0                | 88828000         |
| sp P0DPI2   | GATD3A    | sp P0DPI2     | 2                  | 5            | 5                       | 5          | 30                | 28.17             | 504530000        | 384590000        | 394500000        | 472040000        | 644230000        | 495730000        |
| sp A0A0C    | IGKV1-12  | sp A0A0C      | 1                  | 1            | 1                       | 1          | 17                | 12.645            | 0                | 0                | 0                | 0                | 313010000        | 0                |
| sp A0AVT    | UBA6      | sp A0AVT      | 1                  | 21           | 21                      | 21         | 26                | 117.97            | 997210000        | 1282600000       | 899440000        | 1137700000       | 1186800000       | 1016400000       |
| sp A0FGR    | ESYT2     | sp A0FGR      | 1                  | 9            | 9                       | 9          | 14                | 102.36            | 211090000        | 255030000        | 264560000        | 311370000        | 234600000        | 233320000        |
| sp A0JLT2   | MED19     | sp A0JLT2     | 1                  | 2            | 2                       | 2          | 21                | 26.273            | 0                | 0                | 0                | 0                | 0                | 32156000         |
| sp A0MZ6    | SHTN1     | sp A0MZ6      | 1                  | 6            | 6                       | 6          | 13                | 71.639            | 225060000        | 191510000        | 0                | 226570000        | 223480000        | 0                |
| sp A1L0T0   | ILVBL     | sp A1L0T0     | 1                  | 7            | 7                       | 7          | 19                | 67.867            | 271700000        | 248670000        | 326650000        | 345190000        | 265560000        | 187680000        |
| sp A1L157   | TSPAN11   | sp A1L157     | 1                  | 1            | 1                       | 1          | 3.2               | 28.245            | 0                | 0                | 0                | 0                | 0                | 325900000        |
| sp A1X283   | SH3PXD2   | sp A1X283     | 1                  | 3            | 3                       | 2          | 3.2               | 101.58            | 57145000         | 64497000         | 0                | 0                | 70814000         | 79743000         |
| sp A2A3N    | PIPSL     | sp A2A3N      | 2                  | 3            | 2                       | 2          | 4.8               | 95.047            | 0                | 0                | 0                | 0                | 79478000         | 0                |
| sp A3KMH    | VWA8      | sp A3KMH      | 1                  | 3            | 3                       | 3          | 2.9               | 214.82            | 0                | 0                | 0                | 0                | 0                | 41823000         |
| sp A3KN8    | SBNO1     | sp A3KN8      | 1                  | 4            | 4                       | 4          | 4.4               | 154.31            | 0                | 0                | 79631000         | 0                | 0                | 57983000         |
| sp A4D1E    | GTPBP10   | sp A4D1E      | 1                  | 3            | 3                       | 3          | 15                | 42.932            | 132030000        | 0                | 82881000         | 84058000         | 115240000        | 69105000         |
| sp A5YKK    | CNOT1     | sp A5YKK      | 1                  | 24           | 24                      | 24         | 13                | 266.94            | 792400000        | 961250000        | 876170000        | 782180000        | 690360000        | 766000000        |
| sp Q9GZC    | MAP1LC3   | sp Q9GZC      | 3                  | 2            | 2                       | 2          | 17                | 14.688            | 265450000        | 348940000        | 273230000        | 512850000        | 376930000        | 262640000        |
| sp A6NDG    | PGP       | sp A6NDG      | 1                  | 8            | 8                       | 8          | 37                | 34.006            | 598380000        | 370420000        | 463860000        | 382890000        | 441490000        | 309330000        |
| sp A6NDR    | MEIS3P1   | sp A6NDR      | 4                  | 1            | 1                       | 1          | 4                 | 30.204            | 0                | 0                | 0                | 0                | 0                | 50886000         |
| sp A6NDU    | C5orf51   | sp A6NDU      | 1                  | 3            | 3                       | 3          | 18                | 33.62             | 187660000        | 274420000        | 0                | 137500000        | 0                | 0                |
| sp A6NHL    | TUBAL3    | sp A6NHL      | 1                  | 5            | 1                       | 1          | 11                | 49.908            | 0                | 0                | 0                | 0                | 23857000         | 0                |
| sp A6NHC    | FBLL1     | sp A6NHC      | 1                  | 2            | 1                       | 1          | 6.6               | 34.803            | 0                | 0                | 0                | 0                | 0                | 740750000        |
| sp A6NHF    | SMCHD1    | sp A6NHF      | 1                  | 8            | 8                       | 8          | 6.1               | 226.37            | 320920000        | 272290000        | 0                | 299240000        | 309340000        | 337490000        |
| sp A6NKD    | CCDC85C   | sp A6NKD      | 1                  | 1            | 1                       | 1          | 4.3               | 45.209            | 0                | 0                | 0                | 0                | 0                | 90920000         |
| sp A6NKT    | RGPD3     | sp A6NKT      | 4                  | 18           | 1                       | 1          | 13                | 197.48            | 0                | 0                | 0                | 0                | 0                | 134930000        |
| sp A8CG3    | POM121C   | sp A8CG3      | 2                  | 3            | 3                       | 3          | 4.1               | 125.09            | 0                | 88746000         | 33293000         | 77209000         | 0                | 0                |
| sp A8K8P    | SFI1      | sp A8K8P      | 1                  | 1            | 1                       | 1          | 0.6               | 147.66            | 0                | 170180000        | 0                | 0                | 0                | 0                |
| sp A8MQ0    | CYSRT1    | sp A8MQ0      | 1                  | 2            | 2                       | 2          | 25                | 15.313            | 83168000         | 0                | 0                | 0                | 0                | 76193000         |
| sp P62308   | SNRPG     | sp P62308     | 2                  | 2            | 2                       | 2          | 25                | 8.496             | 2115600000       | 1934200000       | 1930900000       | 1633900000       | 2234500000       | 1609100000       |
| sp A8MXV    | NUDT19    | sp A8MXV      | 1                  | 1            | 1                       | 1          | 8                 | 42.233            | 0                | 0                | 0                | 0                | 0                | 17372000         |
| sp B7ZAP    | RABGAP    | sp B7ZAP      | 1                  | 2            | 1                       | 1          | 10                | 29.038            | 0                | 0                | 0                | 0                | 0                | 372870000        |
| sp P0CG0    | GPR89B    | sp P0CG0      | 2                  | 1            | 1                       | 1          | 2.6               | 52.916            | 0                | 0                | 0                | 0                | 74044000         | 0                |
| sp Q13764   | NACA      | sp Q13764     | 2                  | 5            | 5                       | 4          | 33                | 23.384            | 7295000000       | 8535600000       | 6227800000       | 5949300000       | 6370500000       | 5699000000       |
| sp E9PRG    | C11orf98  | sp E9PRG      | 1                  | 1            | 1                       | 1          | 11                | 13.798            | 0                | 0                | 0                | 152130000        | 0                | 0                |
| sp L0R6Q    | SLC35A4   | sp L0R6Q      | 1                  | 4            | 4                       | 4          | 48                | 11.133            | 368050000        | 252330000        | 381750000        | 443910000        | 411600000        | 442300000        |

|           |         |           |   |    |    |    |     |        |            |            |            |             |             |            |
|-----------|---------|-----------|---|----|----|----|-----|--------|------------|------------|------------|-------------|-------------|------------|
| sp L0R819 | ASDURF  | sp L0R819 | 1 | 1  | 1  | 1  | 10  | 11.25  | 0          | 0          | 0          | 0           | 43716000    | 0          |
| sp O00116 | AGPS    | sp O00116 | 1 | 18 | 18 | 18 | 41  | 72.911 | 3498100000 | 3475400000 | 3431200000 | 4632800000  | 4307800000  | 5328400000 |
| sp O00124 | UBXN8   | sp O00124 | 1 | 1  | 1  | 1  | 6.3 | 30.541 | 0          | 0          | 0          | 15520000    | 0           | 0          |
| sp O00139 | KIF2A   | sp O00139 | 1 | 10 | 10 | 9  | 17  | 79.954 | 349060000  | 425880000  | 319850000  | 425210000   | 351760000   | 331270000  |
| sp O00148 | DDX39A  | sp O00148 | 1 | 18 | 7  | 7  | 49  | 49.129 | 1384400000 | 1321000000 | 1601500000 | 1871200000  | 1938300000  | 1959700000 |
| sp O00157 | PDLIM1  | sp O00157 | 1 | 14 | 14 | 14 | 71  | 36.071 | 1612600000 | 1443100000 | 1127700000 | 1507400000  | 1508600000  | 1437700000 |
| sp O00158 | ACOT7   | sp O00158 | 2 | 9  | 9  | 9  | 30  | 41.796 | 2409200000 | 2516500000 | 2643400000 | 2607200000  | 2622000000  | 2867700000 |
| sp O00159 | MYO1C   | sp O00159 | 1 | 24 | 24 | 24 | 29  | 121.68 | 2085900000 | 2382500000 | 2324800000 | 2095500000  | 2224700000  | 2775600000 |
| sp O00167 | SNAP23  | sp O00167 | 1 | 6  | 6  | 6  | 36  | 23.354 | 440450000  | 363770000  | 527800000  | 504700000   | 534240000   | 429870000  |
| sp O00168 | HAX1    | sp O00168 | 1 | 3  | 3  | 3  | 18  | 31.62  | 102250000  | 0          | 95599000   | 115930000   | 115990000   | 106470000  |
| sp O00170 | AIP     | sp O00170 | 1 | 9  | 9  | 9  | 42  | 37.636 | 1306200000 | 1163300000 | 1124800000 | 1119700000  | 1065100000  | 835570000  |
| sp O00178 | GTPBP1  | sp O00178 | 1 | 3  | 3  | 3  | 7   | 72.453 | 0          | 0          | 77957000   | 0           | 0           | 0          |
| sp O00180 | KCNK1   | sp O00180 | 1 | 1  | 1  | 1  | 5.7 | 38.143 | 0          | 0          | 86876000   | 98339000    | 0           | 0          |
| sp O00186 | STXBP3  | sp O00186 | 1 | 5  | 5  | 5  | 9.8 | 67.764 | 76407000   | 60548000   | 87726000   | 72651000    | 85268000    | 81877000   |
| sp O00193 | SMAP    | sp O00193 | 1 | 4  | 4  | 4  | 26  | 20.332 | 954130000  | 724730000  | 782880000  | 841830000   | 616460000   | 773200000  |
| sp O00194 | RAB27B  | sp O00194 | 1 | 1  | 1  | 1  | 5   | 24.608 | 0          | 0          | 0          | 0           | 13376000    | 0          |
| sp O00203 | AP3B1   | sp O00203 | 2 | 9  | 9  | 9  | 11  | 121.32 | 478770000  | 599930000  | 514690000  | 670640000   | 446270000   | 431830000  |
| sp O00214 | LGALS8  | sp O00214 | 1 | 3  | 3  | 3  | 11  | 35.808 | 0          | 0          | 0          | 0           | 0           | 109140000  |
| sp O00217 | NDUFS8  | sp O00217 | 1 | 3  | 3  | 3  | 18  | 23.705 | 202490000  | 236730000  | 243090000  | 170710000   | 237210000   | 235760000  |
| sp O00233 | PSMD11  | sp O00233 | 1 | 15 | 15 | 15 | 42  | 47.463 | 2479300000 | 2834800000 | 2872700000 | 2799500000  | 3027200000  | 3277300000 |
| sp O00233 | PSMD12  | sp O00233 | 1 | 18 | 18 | 18 | 46  | 52.904 | 2956000000 | 2554300000 | 2741300000 | 2711400000  | 2599600000  | 3150000000 |
| sp O00233 | PSMD9   | sp O00233 | 1 | 8  | 8  | 8  | 41  | 24.682 | 679250000  | 566240000  | 502280000  | 630660000   | 687780000   | 586430000  |
| sp O00244 | ATOX1   | sp O00244 | 1 | 3  | 3  | 3  | 50  | 7.4016 | 1136300000 | 1334800000 | 1267400000 | 1203400000  | 1762200000  | 1031000000 |
| sp O00257 | CBX4    | sp O00257 | 1 | 3  | 3  | 3  | 10  | 61.367 | 0          | 0          | 36702000   | 0           | 0           | 0          |
| sp O00264 | PGRMC1  | sp O00264 | 1 | 9  | 8  | 8  | 58  | 21.671 | 2168200000 | 2320900000 | 2616400000 | 2791600000  | 2637900000  | 2175000000 |
| sp O00267 | SUPT5H  | sp O00267 | 1 | 11 | 11 | 11 | 16  | 121    | 558960000  | 474360000  | 589040000  | 418730000   | 478690000   | 641380000  |
| sp O00273 | DFFA    | sp O00273 | 1 | 8  | 8  | 8  | 30  | 36.521 | 848230000  | 1057300000 | 745800000  | 817030000   | 809740000   | 930100000  |
| sp O00293 | CLIC1   | sp O00293 | 1 | 13 | 13 | 13 | 70  | 26.922 | 1.2853E+10 | 1.451E+10  | 1.2087E+10 | 12687000000 | 13919000000 | 1.117E+10  |
| sp O00303 | EIF3F   | sp O00303 | 1 | 13 | 13 | 13 | 43  | 37.563 | 2860500000 | 3162100000 | 2793100000 | 2618700000  | 2717900000  | 3253300000 |
| sp O00308 | WWP2    | sp O00308 | 1 | 1  | 1  | 1  | 2   | 98.911 | 0          | 0          | 0          | 0           | 0           | 28899000   |
| sp O00330 | PDHX    | sp O00330 | 1 | 5  | 5  | 5  | 16  | 54.122 | 292570000  | 184810000  | 273220000  | 178610000   | 233560000   | 271100000  |
| sp O00401 | WASL    | sp O00401 | 1 | 3  | 3  | 3  | 6.9 | 54.826 | 0          | 0          | 0          | 0           | 164840000   | 0          |
| sp O00410 | IPO5    | sp O00410 | 1 | 36 | 36 | 34 | 54  | 123.63 | 1.0424E+10 | 1.0603E+10 | 1.1435E+10 | 10919000000 | 9729800000  | 1.0188E+10 |
| sp O00411 | POLRMT  | sp O00411 | 1 | 3  | 3  | 3  | 4.5 | 138.62 | 0          | 0          | 0          | 0           | 164780000   | 0          |
| sp O00422 | SAP18   | sp O00422 | 1 | 6  | 6  | 6  | 33  | 17.561 | 601250000  | 697450000  | 389500000  | 529110000   | 753000000   | 958410000  |
| sp O00423 | IGF2BP3 | sp O00423 | 1 | 18 | 18 | 16 | 38  | 63.704 | 2717300000 | 2896100000 | 2779800000 | 2646800000  | 2830900000  | 2634000000 |
| sp O00429 | DNM1L   | sp O00429 | 1 | 24 | 24 | 24 | 53  | 81.876 | 1767800000 | 2019600000 | 2145100000 | 1741300000  | 1658100000  | 1877400000 |
| sp O00442 | RTCA    | sp O00442 | 1 | 3  | 3  | 3  | 14  | 39.336 | 123670000  | 89422000   | 76924000   | 0           | 107770000   | 142070000  |
| sp O00456 | IFRD1   | sp O00456 | 1 | 3  | 3  | 3  | 12  | 50.268 | 0          | 0          | 0          | 0           | 0           | 154970000  |

|                  |          |   |    |    |    |     |        |            |            |            |            |            |            |
|------------------|----------|---|----|----|----|-----|--------|------------|------------|------------|------------|------------|------------|
| sp O0046 GOLIM4  | sp O0046 | 1 | 8  | 8  | 8  | 14  | 81.879 | 342190000  | 409790000  | 476160000  | 480060000  | 557640000  | 498740000  |
| sp O0046 AGRN    | sp O0046 | 1 | 3  | 3  | 3  | 2.3 | 217.23 | 0          | 0          | 0          | 26884000   | 0          | 0          |
| sp O0046 PLOD2   | sp O0046 | 1 | 14 | 14 | 14 | 26  | 84.685 | 1564800000 | 2112900000 | 1716400000 | 1505500000 | 1721600000 | 1665300000 |
| sp O0048 NDUFA4  | sp O0048 | 1 | 4  | 4  | 4  | 47  | 9.3697 | 735290000  | 695230000  | 838160000  | 599670000  | 608200000  | 699660000  |
| sp O0048 PSMD14  | sp O0048 | 1 | 7  | 7  | 7  | 41  | 34.577 | 1491600000 | 1923600000 | 1333300000 | 1515900000 | 1607300000 | 1838700000 |
| sp O0048 ZNF593  | sp O0048 | 1 | 1  | 1  | 1  | 10  | 15.199 | 0          | 0          | 0          | 0          | 0          | 34222000   |
| sp O0049 BIN1    | sp O0049 | 1 | 9  | 9  | 9  | 25  | 64.699 | 329730000  | 611070000  | 615400000  | 398650000  | 427490000  | 351320000  |
| sp O0050 KPNA3   | sp O0050 | 1 | 9  | 7  | 7  | 30  | 57.81  | 581730000  | 522730000  | 644440000  | 473920000  | 396030000  | 577920000  |
| sp O0050 USP9Y   | sp O0050 | 1 | 11 | 1  | 1  | 5.4 | 291.07 | 0          | 0          | 0          | 0          | 48870000   | 0          |
| sp O0054 PES1    | sp O0054 | 1 | 12 | 12 | 12 | 21  | 68.002 | 1086000000 | 1160200000 | 1150600000 | 1081700000 | 1115800000 | 1310300000 |
| sp O0056 SDCBP   | sp O0056 | 1 | 9  | 9  | 9  | 51  | 32.444 | 674690000  | 787260000  | 549830000  | 637010000  | 667860000  | 716830000  |
| sp O0056 MPHOSP  | sp O0056 | 1 | 7  | 7  | 7  | 19  | 78.863 | 451850000  | 383970000  | 478440000  | 391370000  | 372460000  | 467350000  |
| sp O0056 NOP56   | sp O0056 | 1 | 22 | 22 | 22 | 48  | 66.049 | 3771700000 | 4120300000 | 3941500000 | 4499600000 | 4616700000 | 4417600000 |
| sp O0057 DDX3X   | sp O0057 | 3 | 30 | 29 | 29 | 53  | 73.243 | 9735600000 | 1.0143E+10 | 1.1098E+10 | 9228500000 | 9493100000 | 1.0568E+10 |
| sp O0059 PODXL   | sp O0059 | 1 | 7  | 7  | 7  | 12  | 58.635 | 1548200000 | 1699100000 | 1187700000 | 1903100000 | 1700600000 | 1856800000 |
| sp O0062 PIR     | sp O0062 | 1 | 8  | 8  | 8  | 43  | 32.113 | 1177000000 | 1674600000 | 1433800000 | 1197200000 | 996030000  | 1400400000 |
| sp O0062 KPNA4   | sp O0062 | 1 | 11 | 11 | 9  | 39  | 57.886 | 1498800000 | 1432800000 | 1414000000 | 1236400000 | 1337200000 | 1205900000 |
| sp O0074 PPP6C   | sp O0074 | 1 | 9  | 9  | 9  | 40  | 35.144 | 810990000  | 861790000  | 742380000  | 763730000  | 762100000  | 651690000  |
| sp O0076 UBE2C   | sp O0076 | 1 | 4  | 4  | 4  | 39  | 19.652 | 540370000  | 340730000  | 505190000  | 295420000  | 0          | 281300000  |
| sp O0076 PDXK    | sp O0076 | 1 | 11 | 11 | 11 | 44  | 35.102 | 2084000000 | 2325900000 | 2035400000 | 2224900000 | 2317400000 | 2274800000 |
| sp O0076 SCD     | sp O0076 | 1 | 2  | 2  | 2  | 11  | 41.522 | 116060000  | 499020000  | 479250000  | 16272000   | 20105000   | 12995000   |
| sp O1449 CLDN4   | sp O1449 | 4 | 1  | 1  | 1  | 7.7 | 22.077 | 0          | 0          | 0          | 0          | 0          | 60188000   |
| sp O1449 ARID1A  | sp O1449 | 1 | 5  | 5  | 4  | 4   | 242.04 | 115670000  | 104560000  | 0          | 0          | 0          | 109420000  |
| sp O1451 NCKAP5  | sp O1451 | 1 | 3  | 3  | 3  | 1.8 | 208.53 | 0          | 259680000  | 0          | 0          | 0          | 0          |
| sp O1452 SDHD    | sp O1452 | 1 | 2  | 2  | 2  | 11  | 17.043 | 81334000   | 116770000  | 0          | 143700000  | 0          | 0          |
| sp O1453 TXNDC9  | sp O1453 | 1 | 7  | 7  | 7  | 37  | 26.534 | 329100000  | 362990000  | 372450000  | 312120000  | 437020000  | 369590000  |
| sp O1454 COX7A2L | sp O1454 | 1 | 2  | 2  | 2  | 40  | 12.615 | 0          | 209280000  | 302690000  | 187880000  | 0          | 0          |
| sp O1456 NDUFAB1 | sp O1456 | 1 | 4  | 4  | 4  | 21  | 17.417 | 926040000  | 1249900000 | 1094500000 | 1024800000 | 1172400000 | 727810000  |
| sp O1456 UBFD1   | sp O1456 | 1 | 1  | 1  | 1  | 5.8 | 33.382 | 0          | 0          | 0          | 0          | 0          | 27404000   |
| sp O1456 CYB561D | sp O1456 | 1 | 1  | 1  | 1  | 5.4 | 23.973 | 0          | 0          | 0          | 0          | 0          | 18161000   |
| sp O1457 COPE    | sp O1457 | 1 | 10 | 10 | 10 | 50  | 34.482 | 1687400000 | 1677500000 | 1494800000 | 1955500000 | 1415600000 | 1235300000 |
| sp O1461 AP3D1   | sp O1461 | 1 | 15 | 15 | 15 | 21  | 130.16 | 635370000  | 693950000  | 799070000  | 686800000  | 918310000  | 773160000  |
| sp O1461 CCS     | sp O1461 | 1 | 2  | 2  | 2  | 7.7 | 29.04  | 0          | 0          | 0          | 80991000   | 0          | 0          |
| sp O1463 ABLM1   | sp O1463 | 1 | 5  | 5  | 5  | 9.8 | 87.687 | 130360000  | 185790000  | 179790000  | 0          | 0          | 196790000  |
| sp Q9299 DVL3    | sp Q9299 | 2 | 1  | 1  | 1  | 1.7 | 78.054 | 0          | 0          | 0          | 0          | 0          | 44223000   |
| sp O1464 CHD1    | sp O1464 | 1 | 5  | 5  | 5  | 3.7 | 196.69 | 0          | 85877000   | 0          | 0          | 0          | 0          |
| sp O1465 TOR1A   | sp O1465 | 1 | 1  | 1  | 1  | 3   | 37.808 | 0          | 0          | 0          | 0          | 0          | 58361000   |
| sp O1465 TOR1B   | sp O1465 | 1 | 3  | 3  | 3  | 8.6 | 37.978 | 82800000   | 75055000   | 100360000  | 85964000   | 93084000   | 0          |
| sp O1467 ADAM10  | sp O1467 | 1 | 1  | 1  | 1  | 4   | 84.141 | 0          | 0          | 0          | 0          | 0          | 44282000   |

|                  |           |   |    |    |    |     |        |            |            |            |            |            |            |
|------------------|-----------|---|----|----|----|-----|--------|------------|------------|------------|------------|------------|------------|
| sp O1468 PTGES   | sp O1468  | 1 | 2  | 2  | 2  | 13  | 17.102 | 684160000  | 504420000  | 1273900000 | 1559700000 | 1309700000 | 1992100000 |
| sp O1473 IMPA2   | sp O1473  | 1 | 2  | 2  | 2  | 7.6 | 31.321 | 0          | 0          | 0          | 0          | 0          | 58130000   |
| sp O1473 ACOT8   | sp O1473  | 1 | 2  | 2  | 2  | 8.5 | 35.914 | 0          | 0          | 0          | 0          | 89968000   | 0          |
| sp O1473 CDIPT   | sp O1473  | 1 | 2  | 2  | 2  | 10  | 23.539 | 163510000  | 144590000  | 188790000  | 158380000  | 140840000  | 212140000  |
| sp O1473 PDCD5   | sp O1473  | 1 | 6  | 6  | 6  | 46  | 14.285 | 1956800000 | 1666700000 | 2275400000 | 1740100000 | 2175500000 | 2111600000 |
| sp O1474 PRMT5   | sp O1474  | 1 | 18 | 18 | 18 | 39  | 72.683 | 2388100000 | 2235100000 | 2250500000 | 2401900000 | 2228200000 | 2360700000 |
| sp O1474 SLC9A3R | sp O1474  | 1 | 12 | 12 | 12 | 39  | 38.868 | 2248200000 | 1989900000 | 1721000000 | 2041100000 | 2305500000 | 2220000000 |
| sp O1477 TPP1    | sp O1477  | 1 | 2  | 2  | 2  | 5.7 | 61.247 | 83196000   | 0          | 0          | 0          | 0          | 217810000  |
| sp O1477 TCERG1  | sp O1477  | 1 | 24 | 24 | 24 | 24  | 123.9  | 1429900000 | 1531700000 | 1489900000 | 1374400000 | 1300000000 | 1521700000 |
| sp O1477 NDC80   | sp O1477  | 1 | 5  | 5  | 5  | 8.6 | 73.912 | 146910000  | 0          | 196220000  | 0          | 126440000  | 0          |
| sp O1478 TNPO2   | sp O1478  | 1 | 4  | 1  | 1  | 5.4 | 101.39 | 0          | 0          | 0          | 0          | 9895200    | 0          |
| sp O1481 PSMA7   | sp O1481  | 2 | 12 | 12 | 12 | 53  | 27.887 | 4805400000 | 4927000000 | 4570800000 | 4838100000 | 5554100000 | 5564900000 |
| sp O1482 SCAMP3  | sp O1482  | 1 | 7  | 7  | 7  | 31  | 38.287 | 755550000  | 1031300000 | 733200000  | 670350000  | 611320000  | 1057500000 |
| sp O1487 IFIT3   | sp O1487  | 1 | 8  | 8  | 8  | 24  | 55.984 | 199430000  | 212150000  | 167840000  | 260840000  | 209680000  | 201180000  |
| sp O1488 MGST3   | sp O1488  | 1 | 3  | 3  | 3  | 25  | 16.516 | 690110000  | 477770000  | 678340000  | 748700000  | 393860000  | 435040000  |
| sp O1490 TAX1BP3 | sp O1490  | 1 | 2  | 2  | 2  | 25  | 13.735 | 503360000  | 330960000  | 454750000  | 403540000  | 502640000  | 517220000  |
| sp O1490 GIPC1   | sp O1490  | 2 | 7  | 7  | 7  | 33  | 36.049 | 475260000  | 392070000  | 497810000  | 303340000  | 412730000  | 370660000  |
| sp O1492 TIMM23  | sp O1492  | 2 | 3  | 3  | 3  | 23  | 21.943 | 390100000  | 519660000  | 340120000  | 331830000  | 424700000  | 326170000  |
| sp O1492 HAT1    | sp O1492  | 1 | 10 | 10 | 10 | 35  | 49.512 | 2357700000 | 2127700000 | 2486200000 | 1784400000 | 1948500000 | 2033600000 |
| sp O1493 CASK    | sp O1493  | 1 | 5  | 5  | 5  | 7.5 | 105.12 | 97844000   | 178410000  | 137540000  | 114210000  | 125020000  | 136130000  |
| sp O1494 UQCQRQ  | sp O1494  | 1 | 3  | 3  | 3  | 33  | 9.9062 | 399150000  | 394540000  | 434530000  | 417250000  | 521160000  | 427500000  |
| sp P19105 MYL12A | sp P19105 | 2 | 8  | 8  | 3  | 63  | 19.794 | 7570200000 | 7087600000 | 6974800000 | 7474300000 | 8589500000 | 8415800000 |
| sp O1496 HGS     | sp O1496  | 1 | 8  | 8  | 8  | 11  | 86.191 | 693160000  | 441780000  | 566470000  | 573600000  | 597650000  | 625630000  |
| sp O1496 AURKA   | sp O1496  | 1 | 11 | 11 | 11 | 38  | 45.809 | 305790000  | 326930000  | 379340000  | 355290000  | 389540000  | 409550000  |
| sp O1497 DSCR3   | sp O1497  | 1 | 5  | 5  | 5  | 21  | 33.01  | 123310000  | 113790000  | 127540000  | 96542000   | 105740000  | 71293000   |
| sp O1497 PPP1R12 | sp O1497  | 1 | 15 | 15 | 15 | 21  | 115.28 | 1228900000 | 1106600000 | 989780000  | 1039200000 | 1081600000 | 1157700000 |
| sp O1497 SLC27A2 | sp O1497  | 1 | 4  | 4  | 4  | 12  | 70.311 | 71866000   | 86429000   | 89325000   | 116330000  | 132680000  | 85705000   |
| sp O1497 GAK     | sp O1497  | 1 | 6  | 6  | 6  | 6.6 | 143.19 | 138750000  | 196040000  | 157570000  | 160330000  | 159380000  | 120420000  |
| sp O1497 HNRNPDL | sp O1497  | 1 | 11 | 10 | 10 | 21  | 46.437 | 4476900000 | 3526000000 | 3853000000 | 3836900000 | 4132600000 | 3950500000 |
| sp O1498 XPO1    | sp O1498  | 1 | 35 | 35 | 35 | 45  | 123.38 | 6086400000 | 6653800000 | 6257700000 | 5733500000 | 5319900000 | 6071900000 |
| sp O1498 BTAF1   | sp O1498  | 1 | 2  | 2  | 2  | 1.5 | 206.89 | 0          | 0          | 0          | 0          | 0          | 62518000   |
| sp O1501 ARHGEF1 | sp O1501  | 1 | 4  | 4  | 4  | 4.3 | 151.61 | 33742000   | 52530000   | 54864000   | 31305000   | 32839000   | 31360000   |
| sp O1502 SPTBN2  | sp O1502  | 1 | 18 | 12 | 12 | 11  | 271.32 | 467990000  | 417560000  | 388780000  | 355690000  | 372840000  | 434350000  |
| sp O1502 SEC16A  | sp O1502  | 1 | 29 | 29 | 29 | 25  | 233.51 | 1698700000 | 1618500000 | 1629800000 | 1690700000 | 1401700000 | 1594300000 |
| sp O1503 PLXNB2  | sp O1503  | 1 | 11 | 11 | 11 | 8.1 | 205.12 | 530330000  | 533430000  | 690030000  | 419010000  | 605220000  | 548520000  |
| sp O1504 U2SURP  | sp O1504  | 1 | 8  | 8  | 8  | 13  | 118.29 | 816770000  | 644520000  | 826590000  | 569360000  | 526220000  | 698140000  |
| sp O1505 SYNJ2   | sp O1505  | 1 | 2  | 2  | 2  | 1.7 | 165.54 | 0          | 75116000   | 0          | 0          | 0          | 0          |
| sp O1506 SYNM    | sp O1506  | 1 | 4  | 4  | 4  | 4.7 | 172.77 | 0          | 61466000   | 82772000   | 0          | 81380000   | 78354000   |
| sp O1506 PFAS    | sp O1506  | 1 | 34 | 34 | 34 | 39  | 144.73 | 4310000000 | 5048800000 | 5188300000 | 4980000000 | 3747700000 | 3983600000 |

|                    |           |   |    |    |    |     |        |            |            |            |            |            |            |
|--------------------|-----------|---|----|----|----|-----|--------|------------|------------|------------|------------|------------|------------|
| sp O15076 CEP290   | sp O15076 | 1 | 2  | 2  | 2  | 0.7 | 290.38 | 0          | 0          | 0          | 0          | 0          | 661910000  |
| sp O15084 ANKRD28  | sp O15084 | 2 | 2  | 2  | 2  | 2.8 | 112.96 | 0          | 88324000   | 0          | 0          | 0          | 0          |
| sp O15091 KIAA0391 | sp O15091 | 1 | 2  | 2  | 2  | 7.2 | 67.315 | 0          | 0          | 0          | 160900000  | 0          | 0          |
| sp O15116 LSM1     | sp O15116 | 1 | 2  | 2  | 2  | 26  | 15.179 | 0          | 0          | 0          | 0          | 26857000   | 0          |
| sp O15118 NPC1     | sp O15118 | 1 | 2  | 2  | 2  | 1.5 | 142.17 | 0          | 0          | 0          | 0          | 0          | 51096000   |
| sp O15121 DEGS1    | sp O15121 | 1 | 3  | 3  | 3  | 15  | 37.866 | 293890000  | 237880000  | 233170000  | 155970000  | 179280000  | 170130000  |
| sp O15126 SCAMP1   | sp O15126 | 1 | 5  | 5  | 5  | 30  | 37.92  | 2501400000 | 1602500000 | 1467900000 | 1190500000 | 1314800000 | 2065600000 |
| sp O15127 SCAMP2   | sp O15127 | 1 | 1  | 1  | 1  | 6.1 | 36.648 | 0          | 66741000   | 139630000  | 0          | 0          | 110370000  |
| sp O15143 ARPC1B   | sp O15143 | 1 | 15 | 15 | 14 | 50  | 40.949 | 4928900000 | 3864300000 | 4754400000 | 5111300000 | 4716000000 | 4180100000 |
| sp O15144 ARPC2    | sp O15144 | 1 | 15 | 15 | 15 | 54  | 34.333 | 4193200000 | 5296400000 | 3764300000 | 4055600000 | 3794700000 | 3822400000 |
| sp O15144 ARPC3    | sp O15144 | 1 | 9  | 9  | 9  | 53  | 20.546 | 2303300000 | 2816200000 | 2670400000 | 2601600000 | 2442300000 | 2094400000 |
| sp O15160 POLR1C   | sp O15160 | 1 | 7  | 7  | 7  | 30  | 39.249 | 523380000  | 563940000  | 495970000  | 547470000  | 592260000  | 576900000  |
| sp O15162 PLSCR1   | sp O15162 | 1 | 1  | 1  | 1  | 6.3 | 35.049 | 0          | 0          | 0          | 0          | 0          | 31457000   |
| sp O15164 TRIM24   | sp O15164 | 1 | 1  | 1  | 1  | 1   | 116.83 | 0          | 0          | 27101000   | 0          | 0          | 0          |
| sp O15173 PGRMC2   | sp O15173 | 1 | 10 | 10 | 9  | 40  | 23.818 | 2078600000 | 1781000000 | 2175900000 | 2045500000 | 2696800000 | 2316000000 |
| sp O15212 PFDN6    | sp O15212 | 1 | 5  | 5  | 5  | 34  | 14.582 | 860910000  | 936190000  | 1135200000 | 821790000  | 1020400000 | 888840000  |
| sp O15213 WDR46    | sp O15213 | 1 | 3  | 3  | 3  | 7.7 | 68.07  | 126720000  | 150740000  | 141970000  | 138280000  | 120940000  | 140790000  |
| sp O15226 NKRF     | sp O15226 | 1 | 8  | 8  | 8  | 17  | 77.672 | 324100000  | 234770000  | 246960000  | 224740000  | 405350000  | 389970000  |
| sp O15228 GNPAT    | sp O15228 | 1 | 1  | 1  | 1  | 2.4 | 77.187 | 0          | 0          | 0          | 0          | 86124000   | 0          |
| sp O15231 ZNF185   | sp O15231 | 1 | 4  | 4  | 4  | 12  | 73.525 | 0          | 0          | 0          | 164680000  | 0          | 0          |
| sp O15243 LEPROT   | sp O15243 | 1 | 1  | 1  | 1  | 9.9 | 14.254 | 0          | 0          | 0          | 0          | 0          | 44346000   |
| sp O15243 CLIC2    | sp O15243 | 1 | 4  | 4  | 4  | 30  | 28.356 | 0          | 93168000   | 90404000   | 109960000  | 100570000  | 0          |
| sp O15254 ACOX3    | sp O15254 | 1 | 3  | 3  | 3  | 7.4 | 77.628 | 0          | 1407700000 | 1073700000 | 1365300000 | 1246600000 | 1907600000 |
| sp O15258 RER1     | sp O15258 | 1 | 3  | 3  | 3  | 19  | 22.958 | 420380000  | 463480000  | 354860000  | 525110000  | 489600000  | 503970000  |
| sp O15260 SURF4    | sp O15260 | 1 | 3  | 3  | 3  | 15  | 30.394 | 627250000  | 708420000  | 1318400000 | 972130000  | 936050000  | 1675300000 |
| sp O15263 SPTLC1   | sp O15263 | 1 | 6  | 6  | 6  | 17  | 52.743 | 0          | 0          | 0          | 0          | 0          | 498670000  |
| sp O15270 SPTLC2   | sp O15270 | 1 | 4  | 4  | 4  | 8   | 62.924 | 0          | 31929000   | 0          | 0          | 69187000   | 41648000   |
| sp O15294 OGT      | sp O15294 | 1 | 15 | 15 | 15 | 22  | 116.92 | 894830000  | 759160000  | 875320000  | 714110000  | 747720000  | 759460000  |
| sp O15303 PMM2     | sp O15303 | 2 | 9  | 9  | 9  | 42  | 28.082 | 537840000  | 659700000  | 770320000  | 935780000  | 721250000  | 610890000  |
| sp O15321 TM9SF1   | sp O15321 | 1 | 3  | 3  | 3  | 7.6 | 68.86  | 0          | 0          | 0          | 118900000  | 0          | 0          |
| sp O15321 INPP4B   | sp O15321 | 1 | 1  | 1  | 1  | 2.3 | 104.74 | 0          | 0          | 0          | 0          | 0          | 18189000   |
| sp O15344 MID1     | sp O15344 | 1 | 5  | 5  | 5  | 9.1 | 75.25  | 222480000  | 315600000  | 376200000  | 329090000  | 0          | 283570000  |
| sp O15347 HMGB3    | sp O15347 | 1 | 5  | 5  | 5  | 21  | 22.98  | 955410000  | 1072200000 | 1131500000 | 826150000  | 1075300000 | 1526600000 |
| sp O15353 PPM1G    | sp O15353 | 1 | 17 | 17 | 17 | 44  | 59.271 | 1976100000 | 1896000000 | 1815300000 | 1563500000 | 1802300000 | 1608100000 |
| sp O15355 INPPL1   | sp O15355 | 3 | 17 | 17 | 17 | 18  | 138.6  | 712340000  | 836240000  | 879290000  | 851660000  | 724280000  | 750620000  |
| sp O15371 EIF3D    | sp O15371 | 1 | 16 | 16 | 16 | 47  | 63.972 | 3457800000 | 3824200000 | 3617000000 | 3626200000 | 3339900000 | 3452500000 |
| sp O15372 EIF3H    | sp O15372 | 1 | 10 | 10 | 10 | 28  | 39.93  | 1295600000 | 1640300000 | 1303700000 | 1162800000 | 1088400000 | 1221600000 |
| sp O15373 HDAC3    | sp O15373 | 1 | 3  | 3  | 3  | 11  | 48.847 | 0          | 89515000   | 57395000   | 0          | 0          | 0          |
| sp O15381 NVL      | sp O15381 | 1 | 3  | 3  | 3  | 5.5 | 95.05  | 0          | 0          | 0          | 0          | 42836000   | 0          |

|                  |          |   |    |    |    |     |        |            |            |            |             |             |            |
|------------------|----------|---|----|----|----|-----|--------|------------|------------|------------|-------------|-------------|------------|
| sp O1538 BCAT2   | sp O1538 | 1 | 5  | 5  | 5  | 21  | 44.287 | 185390000  | 187690000  | 236950000  | 176160000   | 214080000   | 203930000  |
| sp O1539 IPO8    | sp O1539 | 1 | 7  | 7  | 7  | 9.8 | 119.94 | 257350000  | 227570000  | 153630000  | 240940000   | 286060000   | 158730000  |
| sp O1540 STX7    | sp O1540 | 1 | 4  | 4  | 4  | 22  | 29.815 | 0          | 125170000  | 0          | 0           | 103620000   | 202650000  |
| sp O1542 SLC16A3 | sp O1542 | 1 | 6  | 6  | 6  | 14  | 49.469 | 1731000000 | 2259100000 | 2076200000 | 2515800000  | 2046200000  | 2497200000 |
| sp O1543 ABCC4   | sp O1543 | 1 | 3  | 3  | 3  | 3.4 | 149.52 | 0          | 0          | 66432000   | 58566000    | 73612000    | 60129000   |
| sp O1544 CD3EAP  | sp O1544 | 1 | 7  | 7  | 7  | 30  | 54.985 | 664220000  | 656910000  | 542850000  | 512190000   | 646260000   | 539150000  |
| sp O1546 P4HA2   | sp O1546 | 1 | 14 | 14 | 14 | 34  | 60.901 | 1658300000 | 954970000  | 1331700000 | 987250000   | 989110000   | 1028900000 |
| sp O1549 YKT6    | sp O1549 | 1 | 6  | 6  | 6  | 33  | 22.417 | 527340000  | 537850000  | 495450000  | 504480000   | 493570000   | 561820000  |
| sp O1551 ARPC5   | sp O1551 | 1 | 5  | 5  | 4  | 58  | 16.32  | 1510900000 | 1150700000 | 1749800000 | 1545200000  | 1742100000  | 1285800000 |
| sp O1551 POLR2D  | sp O1551 | 1 | 3  | 3  | 3  | 38  | 16.311 | 0          | 0          | 158280000  | 116090000   | 154220000   | 0          |
| sp O1553 TAPBP   | sp O1553 | 1 | 2  | 2  | 2  | 9.6 | 47.625 | 0          | 119270000  | 139700000  | 120280000   | 0           | 0          |
| sp O1554 RNF113A | sp O1554 | 2 | 2  | 2  | 2  | 6.4 | 38.787 | 0          | 78869000   | 0          | 0           | 81602000    | 0          |
| sp O1555 KCNN4   | sp O1555 | 1 | 1  | 1  | 1  | 3.5 | 47.695 | 0          | 0          | 0          | 0           | 892700      | 0          |
| sp O4314 DHX15   | sp O4314 | 1 | 27 | 27 | 26 | 38  | 90.932 | 5793700000 | 6063600000 | 6039700000 | 5833600000  | 5581100000  | 5731100000 |
| sp O4314 RNMT    | sp O4314 | 1 | 5  | 5  | 5  | 13  | 54.843 | 114600000  | 333020000  | 0          | 191070000   | 173110000   | 200520000  |
| sp O4315 TTI1    | sp O4315 | 1 | 1  | 1  | 1  | 1.7 | 122.07 | 0          | 0          | 0          | 0           | 0           | 43537000   |
| sp O4315 RRP8    | sp O4315 | 1 | 4  | 4  | 4  | 13  | 50.714 | 180530000  | 181030000  | 185220000  | 251270000   | 211240000   | 194090000  |
| sp O4316 SIPA1L1 | sp O4316 | 1 | 2  | 2  | 2  | 2.4 | 200.03 | 33934000   | 0          | 0          | 0           | 0           | 0          |
| sp O4316 CYB5B   | sp O4316 | 1 | 3  | 3  | 3  | 45  | 16.332 | 1210400000 | 1055800000 | 1096400000 | 1615100000  | 1357200000  | 1446900000 |
| sp O4317 PRPF4   | sp O4317 | 1 | 13 | 13 | 13 | 36  | 58.449 | 961690000  | 884670000  | 980780000  | 712250000   | 1094900000  | 1365400000 |
| sp O4317 PHGDH   | sp O4317 | 1 | 21 | 21 | 21 | 44  | 56.65  | 1.0137E+10 | 1.1781E+10 | 1.0754E+10 | 12772000000 | 13523000000 | 1.4685E+10 |
| sp O4318 NDUFS4  | sp O4318 | 1 | 1  | 1  | 1  | 8.6 | 20.108 | 155740000  | 155790000  | 178590000  | 139080000   | 165260000   | 131660000  |
| sp O4323 SEPT4   | sp O4323 | 1 | 1  | 1  | 1  | 2.3 | 55.098 | 0          | 0          | 0          | 0           | 0           | 916560000  |
| sp O4323 DYNC1L1 | sp O4323 | 1 | 9  | 8  | 8  | 31  | 54.099 | 447080000  | 459250000  | 370280000  | 361160000   | 404660000   | 416470000  |
| sp O4324 PSMD3   | sp O4324 | 1 | 23 | 23 | 23 | 46  | 60.977 | 3639100000 | 3410700000 | 3727100000 | 3784200000  | 3845500000  | 3548100000 |
| sp O4325 PAPSS1  | sp O4325 | 1 | 11 | 11 | 11 | 23  | 70.832 | 879740000  | 916720000  | 1192100000 | 1177900000  | 988490000   | 1118600000 |
| sp O4326 ZW10    | sp O4326 | 1 | 7  | 7  | 7  | 15  | 88.828 | 159190000  | 175420000  | 214260000  | 219650000   | 141630000   | 191860000  |
| sp O4328 B4GALT5 | sp O4328 | 1 | 1  | 1  | 1  | 2.1 | 45.118 | 0          | 0          | 0          | 0           | 0           | 78764000   |
| sp O4329 SART1   | sp O4329 | 1 | 10 | 10 | 10 | 20  | 90.254 | 602520000  | 480450000  | 479940000  | 519920000   | 613620000   | 474660000  |
| sp O4329 GPAA1   | sp O4329 | 1 | 2  | 2  | 2  | 3.1 | 67.622 | 0          | 842250000  | 0          | 0           | 216630000   | 0          |
| sp O4329 TGFB1I1 | sp O4329 | 1 | 3  | 3  | 3  | 11  | 49.814 | 60491000   | 89282000   | 79148000   | 105050000   | 90005000    | 42721000   |
| sp O4331 PPIP5K2 | sp O4331 | 1 | 2  | 2  | 2  | 1.8 | 140.41 | 49955000   | 0          | 68551000   | 57405000    | 0           | 0          |
| sp O4332 EEF1E1  | sp O4332 | 1 | 6  | 6  | 6  | 34  | 19.81  | 227830000  | 296050000  | 276730000  | 285050000   | 286510000   | 273100000  |
| sp O4337 WDR62   | sp O4337 | 1 | 1  | 1  | 1  | 0.8 | 165.95 | 0          | 0          | 0          | 0           | 0           | 29946000   |
| sp O4339 HNRNPR  | sp O4339 | 1 | 27 | 27 | 21 | 47  | 70.942 | 1.2544E+10 | 1.3613E+10 | 1.3498E+10 | 11743000000 | 12452000000 | 1.4613E+10 |
| sp O4339 PRPF3   | sp O4339 | 1 | 7  | 7  | 7  | 16  | 77.528 | 373040000  | 513350000  | 526090000  | 374710000   | 522980000   | 422180000  |
| sp O4339 TXNL1   | sp O4339 | 1 | 11 | 11 | 11 | 57  | 32.251 | 1575100000 | 1447500000 | 1551400000 | 1538000000  | 1611300000  | 1484300000 |
| sp O4339 TPD52L2 | sp O4339 | 1 | 12 | 12 | 12 | 70  | 22.237 | 4867700000 | 4394000000 | 4807600000 | 3714100000  | 4744100000  | 4138800000 |
| sp O4340 EMC8    | sp O4340 | 1 | 3  | 3  | 3  | 17  | 23.773 | 109390000  | 0          | 117310000  | 147020000   | 132700000   | 157090000  |

|           |         |           |   |    |    |    |     |        |            |            |            |             |             |            |
|-----------|---------|-----------|---|----|----|----|-----|--------|------------|------------|------------|-------------|-------------|------------|
| sp O43414 | ERI3    | sp O43414 | 1 | 3  | 3  | 3  | 8   | 37.238 | 0          | 0          | 0          | 0           | 0           | 52391000   |
| sp O43424 | GRID2   | sp O43424 | 1 | 1  | 1  | 1  | 1.1 | 113.35 | 0          | 0          | 0          | 0           | 0           | 140590000  |
| sp O43427 | FIBP    | sp O43427 | 1 | 2  | 2  | 2  | 6.9 | 41.878 | 0          | 0          | 0          | 15192000    | 0           | 0          |
| sp O43433 | EIF4G3  | sp O43433 | 1 | 11 | 6  | 6  | 9.5 | 176.65 | 151380000  | 192730000  | 206130000  | 125750000   | 0           | 109550000  |
| sp O43444 | PPIH    | sp O43444 | 1 | 6  | 6  | 6  | 44  | 19.208 | 1001100000 | 1002100000 | 799360000  | 874730000   | 1081400000  | 912260000  |
| sp O43488 | AKR7A2  | sp O43488 | 2 | 4  | 4  | 4  | 19  | 39.589 | 330940000  | 284670000  | 315420000  | 224910000   | 304340000   | 252630000  |
| sp O43491 | EPB41L2 | sp O43491 | 2 | 19 | 19 | 19 | 29  | 112.59 | 1228600000 | 1262600000 | 1128100000 | 1174300000  | 1285600000  | 1150700000 |
| sp O43504 | LAMTOR5 | sp O43504 | 1 | 4  | 4  | 4  | 86  | 9.6138 | 655860000  | 524330000  | 438560000  | 562090000   | 773160000   | 640170000  |
| sp O43516 | WIPF1   | sp O43516 | 1 | 1  | 1  | 1  | 3.2 | 51.258 | 0          | 0          | 0          | 0           | 36766000    | 0          |
| sp O43561 | RNF13   | sp O43561 | 1 | 1  | 1  | 1  | 6.3 | 42.813 | 0          | 0          | 0          | 0           | 23885000    | 0          |
| sp O43583 | DENR    | sp O43583 | 1 | 6  | 6  | 6  | 39  | 22.092 | 318750000  | 457780000  | 415140000  | 407360000   | 400130000   | 444480000  |
| sp O43592 | XPOT    | sp O43592 | 1 | 21 | 21 | 21 | 31  | 109.96 | 1358600000 | 1387200000 | 1485400000 | 1379600000  | 1219100000  | 1355500000 |
| sp O43598 | DNPH1   | sp O43598 | 1 | 3  | 3  | 3  | 25  | 19.108 | 0          | 177140000  | 0          | 0           | 0           | 0          |
| sp O43613 | TIMM44  | sp O43613 | 1 | 9  | 9  | 9  | 25  | 51.355 | 965320000  | 808480000  | 774450000  | 1293800000  | 1139200000  | 1149500000 |
| sp O43617 | TRAPPC3 | sp O43617 | 1 | 3  | 3  | 3  | 14  | 20.274 | 84272000   | 0          | 137950000  | 119280000   | 0           | 154240000  |
| sp O43633 | CHMP2A  | sp O43633 | 1 | 1  | 1  | 1  | 4.5 | 25.104 | 0          | 0          | 0          | 0           | 0           | 98787000   |
| sp O43638 | FOXS1   | sp O43638 | 3 | 1  | 1  | 1  | 3.3 | 35.434 | 0          | 0          | 0          | 0           | 0           | 51012000   |
| sp O43651 | TSPAN6  | sp O43651 | 1 | 3  | 3  | 3  | 14  | 27.563 | 253440000  | 227340000  | 262400000  | 216760000   | 243500000   | 214260000  |
| sp O43660 | PLRG1   | sp O43660 | 1 | 11 | 11 | 11 | 38  | 57.193 | 714070000  | 595400000  | 583690000  | 659540000   | 732070000   | 634580000  |
| sp O43663 | PRC1    | sp O43663 | 1 | 7  | 7  | 7  | 21  | 71.606 | 81955000   | 0          | 0          | 74725000    | 66902000    | 0          |
| sp O43668 | RGS10   | sp O43668 | 1 | 2  | 2  | 2  | 15  | 20.236 | 0          | 0          | 0          | 65614000    | 52398000    | 0          |
| sp O43670 | ZNF207  | sp O43670 | 1 | 3  | 3  | 3  | 7.9 | 50.75  | 1078700000 | 1350600000 | 1112600000 | 1300500000  | 1470400000  | 1256900000 |
| sp O43674 | NDUFB5  | sp O43674 | 1 | 3  | 3  | 3  | 17  | 21.75  | 85704000   | 0          | 82686000   | 0           | 0           | 88406000   |
| sp O43676 | NDUFB3  | sp O43676 | 1 | 2  | 2  | 2  | 21  | 11.402 | 215340000  | 249900000  | 222800000  | 0           | 170880000   | 153670000  |
| sp O43678 | NDUFA2  | sp O43678 | 1 | 1  | 1  | 1  | 21  | 10.921 | 0          | 0          | 0          | 0           | 196440000   | 0          |
| sp O43681 | ASNA1   | sp O43681 | 1 | 11 | 11 | 11 | 52  | 38.792 | 1097400000 | 1311500000 | 1104500000 | 1687300000  | 1713200000  | 1302200000 |
| sp O43684 | BUB3    | sp O43684 | 1 | 12 | 12 | 12 | 49  | 37.154 | 5257200000 | 4057500000 | 4355300000 | 5212900000  | 5493000000  | 4955600000 |
| sp O43701 | ACTN4   | sp O43701 | 1 | 61 | 61 | 43 | 68  | 104.85 | 9.9294E+10 | 9.4717E+10 | 9.5216E+10 | 91569000000 | 85936000000 | 8.7421E+10 |
| sp O43709 | BUD23   | sp O43709 | 1 | 4  | 4  | 4  | 24  | 31.88  | 268970000  | 257830000  | 277710000  | 243560000   | 327400000   | 293960000  |
| sp O43713 | TRIAP1  | sp O43713 | 1 | 2  | 2  | 2  | 36  | 8.7858 | 0          | 0          | 0          | 0           | 51832000    | 0          |
| sp O43719 | HTATSF1 | sp O43719 | 1 | 10 | 10 | 10 | 18  | 85.852 | 579580000  | 524450000  | 391150000  | 454180000   | 447200000   | 485250000  |
| sp O43741 | AP1G1   | sp O43741 | 1 | 18 | 18 | 18 | 29  | 91.35  | 667530000  | 551080000  | 636620000  | 726100000   | 695000000   | 662640000  |
| sp O43752 | STX6    | sp O43752 | 1 | 1  | 1  | 1  | 7.5 | 29.176 | 0          | 0          | 0          | 0           | 36353000    | 0          |
| sp O43760 | SYNGR2  | sp O43760 | 1 | 2  | 2  | 2  | 8   | 24.81  | 0          | 0          | 0          | 198160000   | 0           | 0          |
| sp O43763 | SGTA    | sp O43763 | 1 | 7  | 7  | 7  | 27  | 34.063 | 897340000  | 750400000  | 983870000  | 928110000   | 1018800000  | 1133100000 |
| sp O43768 | ENSA    | sp O43768 | 1 | 5  | 5  | 4  | 48  | 13.389 | 1181200000 | 816100000  | 1179200000 | 808900000   | 1214300000  | 1143300000 |
| sp O43772 | SLC25A2 | sp O43772 | 1 | 5  | 5  | 5  | 23  | 32.943 | 228780000  | 187620000  | 218160000  | 259350000   | 247660000   | 264250000  |
| sp O43776 | NARS    | sp O43776 | 2 | 15 | 15 | 15 | 33  | 62.942 | 3462200000 | 4101100000 | 3271800000 | 4114200000  | 4387900000  | 3773400000 |
| sp O43793 | MYO1B   | sp O43793 | 1 | 15 | 15 | 15 | 16  | 131.98 | 670360000  | 451960000  | 642640000  | 555760000   | 589540000   | 501540000  |

|                  |          |   |    |    |    |     |        |            |            |            |            |             |            |
|------------------|----------|---|----|----|----|-----|--------|------------|------------|------------|------------|-------------|------------|
| sp O4380 SSNA1   | sp O4380 | 1 | 1  | 1  | 1  | 11  | 13.596 | 0          | 0          | 0          | 0          | 0           | 60043000   |
| sp O4380 SLC25A1 | sp O4380 | 1 | 1  | 1  | 1  | 3.9 | 34.566 | 0          | 0          | 0          | 0          | 10740000    | 0          |
| sp O4380 NUDT21  | sp O4380 | 1 | 11 | 11 | 11 | 45  | 26.227 | 1916600000 | 2214200000 | 2285000000 | 1900800000 | 1894400000  | 1723300000 |
| sp O4381 LANCL1  | sp O4381 | 1 | 9  | 9  | 9  | 32  | 45.283 | 1551300000 | 1398600000 | 1435600000 | 1158100000 | 1455300000  | 1200200000 |
| sp O4381 STRN    | sp O4381 | 1 | 4  | 4  | 4  | 9.5 | 86.131 | 0          | 0          | 0          | 0          | 130430000   | 142410000  |
| sp O4381 RRP9    | sp O4381 | 1 | 10 | 10 | 10 | 26  | 51.84  | 433980000  | 495390000  | 454300000  | 555290000  | 569160000   | 594700000  |
| sp O4381 SCO2    | sp O4381 | 1 | 2  | 2  | 2  | 11  | 29.81  | 0          | 0          | 0          | 0          | 0           | 162920000  |
| sp O4382 AKAP8   | sp O4382 | 1 | 5  | 5  | 5  | 14  | 76.107 | 147350000  | 214740000  | 236150000  | 148910000  | 155730000   | 227250000  |
| sp O4382 GTPBP6  | sp O4382 | 1 | 2  | 2  | 2  | 7.6 | 56.897 | 0          | 0          | 0          | 0          | 0           | 48621000   |
| sp O4383 IDH3B   | sp O4383 | 1 | 12 | 12 | 12 | 46  | 42.183 | 781750000  | 789550000  | 717260000  | 856000000  | 1237300000  | 1014100000 |
| sp O4384 NRDC    | sp O4384 | 1 | 17 | 17 | 17 | 18  | 131.57 | 1154600000 | 1083500000 | 1417800000 | 1081300000 | 1089100000  | 1203000000 |
| sp O4385 CALU    | sp O4385 | 1 | 19 | 19 | 19 | 69  | 37.106 | 9358600000 | 9285200000 | 8622900000 | 9441000000 | 10168000000 | 9863700000 |
| sp O4385 EDIL3   | sp O4385 | 1 | 7  | 7  | 7  | 18  | 53.764 | 473540000  | 518710000  | 400570000  | 468190000  | 409610000   | 408540000  |
| sp O4386 AHCYL1  | sp O4386 | 1 | 13 | 13 | 6  | 33  | 58.951 | 1614800000 | 1429300000 | 1189900000 | 1389100000 | 1323100000  | 1392400000 |
| sp O4389 KIF1C   | sp O4389 | 1 | 2  | 2  | 2  | 2.8 | 122.95 | 0          | 0          | 54900000   | 0          | 72442000    | 0          |
| sp O4391 ORC5    | sp O4391 | 1 | 4  | 4  | 4  | 9   | 50.282 | 121450000  | 109930000  | 119670000  | 119960000  | 139310000   | 99005000   |
| sp O4392 NDUFS5  | sp O4392 | 1 | 3  | 3  | 3  | 29  | 12.517 | 221000000  | 176550000  | 231580000  | 174350000  | 168220000   | 0          |
| sp O4392 ORC4    | sp O4392 | 2 | 4  | 4  | 4  | 12  | 50.377 | 102710000  | 145790000  | 102820000  | 162160000  | 0           | 104850000  |
| sp O6021 RAD21   | sp O6021 | 1 | 9  | 9  | 9  | 26  | 71.689 | 302490000  | 370790000  | 295330000  | 282580000  | 335860000   | 348150000  |
| sp O6022 TIMM8A  | sp O6022 | 1 | 4  | 4  | 4  | 68  | 10.998 | 547440000  | 436910000  | 625600000  | 498430000  | 728310000   | 636110000  |
| sp O6023 DHX16   | sp O6023 | 1 | 10 | 9  | 9  | 15  | 119.26 | 237720000  | 309850000  | 332830000  | 293480000  | 324530000   | 304820000  |
| sp O6023 SSSCA1  | sp O6023 | 1 | 5  | 5  | 5  | 46  | 21.474 | 616300000  | 489420000  | 711840000  | 695430000  | 704660000   | 737610000  |
| sp O6025 PRPSAP2 | sp O6025 | 1 | 5  | 4  | 4  | 20  | 40.925 | 2021900000 | 2592900000 | 2496200000 | 0          | 1749000000  | 1492900000 |
| sp O6026 SMARCA4 | sp O6026 | 1 | 32 | 32 | 22 | 33  | 121.9  | 2403500000 | 2219300000 | 2291900000 | 2162900000 | 2360600000  | 2605800000 |
| sp O6027 SPAG9   | sp O6027 | 1 | 11 | 11 | 10 | 14  | 146.2  | 600630000  | 528060000  | 533480000  | 603350000  | 676480000   | 524210000  |
| sp O6028 URB1    | sp O6028 | 1 | 6  | 6  | 6  | 4.3 | 254.39 | 0          | 183190000  | 145130000  | 232920000  | 214200000   | 171650000  |
| sp O6029 LCMT2   | sp O6029 | 1 | 1  | 1  | 1  | 1.6 | 75.601 | 0          | 0          | 0          | 0          | 0           | 42702000   |
| sp O6030 AQR     | sp O6030 | 1 | 13 | 13 | 13 | 13  | 171.29 | 1440100000 | 987300000  | 1393200000 | 1528200000 | 1331600000  | 1504400000 |
| sp O6031 OPA1    | sp O6031 | 1 | 9  | 9  | 9  | 11  | 111.63 | 506000000  | 425790000  | 406050000  | 335220000  | 426820000   | 409370000  |
| sp O6031 MCM3AP  | sp O6031 | 1 | 1  | 1  | 1  | 0.9 | 218.4  | 0          | 0          | 0          | 0          | 26521000    | 0          |
| sp O6034 KDM1A   | sp O6034 | 1 | 8  | 8  | 8  | 16  | 92.902 | 438640000  | 419910000  | 316910000  | 286380000  | 385310000   | 416790000  |
| sp O6034 TBC1D4  | sp O6034 | 1 | 6  | 6  | 5  | 6.1 | 146.56 | 0          | 207980000  | 115580000  | 98624000   | 123520000   | 127900000  |
| sp O6036 NME2P1  | sp O6036 | 1 | 9  | 1  | 1  | 66  | 15.529 | 0          | 0          | 0          | 0          | 0           | 43119000   |
| sp O6042 FADS1   | sp O6042 | 1 | 4  | 4  | 4  | 16  | 51.964 | 158740000  | 271710000  | 204590000  | 133190000  | 0           | 128080000  |
| sp O6043 PPL     | sp O6043 | 1 | 16 | 16 | 16 | 15  | 204.74 | 698890000  | 883020000  | 619000000  | 454050000  | 420450000   | 398110000  |
| sp O6044 GSDME   | sp O6044 | 1 | 2  | 2  | 2  | 9.7 | 54.554 | 0          | 0          | 0          | 0          | 17816000    | 0          |
| sp O6048 ACSL4   | sp O6048 | 1 | 17 | 15 | 15 | 37  | 79.187 | 1453400000 | 1209200000 | 1256300000 | 1716800000 | 1476800000  | 1535700000 |
| sp O6049 SNX3    | sp O6049 | 1 | 9  | 9  | 8  | 66  | 18.762 | 1429800000 | 1406400000 | 1392000000 | 1192000000 | 1271200000  | 1165600000 |
| sp O6049 STX10   | sp O6049 | 1 | 3  | 3  | 3  | 19  | 28.114 | 0          | 0          | 52906000   | 0          | 0           | 0          |



|                   |          |    |    |    |    |     |        |            |            |            |             |             |            |
|-------------------|----------|----|----|----|----|-----|--------|------------|------------|------------|-------------|-------------|------------|
| sp O6050 MGEA5    | sp O6050 | 1  | 12 | 12 | 12 | 23  | 102.91 | 449460000  | 541890000  | 419600000  | 482040000   | 497920000   | 603360000  |
| sp O6050 SORBS3   | sp O6050 | 1  | 2  | 2  | 2  | 4.5 | 75.34  | 0          | 0          | 0          | 0           | 0           | 56334000   |
| sp O6050 SYNCRIP  | sp O6050 | 1  | 26 | 20 | 20 | 50  | 69.602 | 1.076E+10  | 9809800000 | 1.0385E+10 | 10351000000 | 10281000000 | 9542100000 |
| sp O6050 CDC40    | sp O6050 | 1  | 6  | 6  | 6  | 20  | 65.521 | 148880000  | 163920000  | 0          | 168240000   | 141020000   | 111450000  |
| sp O6051 RANBP6   | sp O6051 | 1  | 11 | 9  | 9  | 14  | 124.71 | 174220000  | 302620000  | 316090000  | 247090000   | 207860000   | 220310000  |
| sp O6052 NEMF     | sp O6052 | 1  | 1  | 1  | 1  | 1.3 | 122.95 | 0          | 0          | 0          | 0           | 0           | 0          |
| sp O6054 GMDS     | sp O6054 | 1  | 3  | 3  | 3  | 9.4 | 41.949 | 163420000  | 142240000  | 165310000  | 167260000   | 138700000   | 165540000  |
| sp O6056 CCNT1    | sp O6056 | 1  | 3  | 3  | 3  | 7.6 | 80.684 | 0          | 0          | 290690000  | 0           | 0           | 0          |
| sp O6056 BUB1B    | sp O6056 | 1  | 8  | 8  | 8  | 11  | 119.54 | 208990000  | 142910000  | 157630000  | 112720000   | 119800000   | 181570000  |
| sp O6056 PLOD3    | sp O6056 | 1  | 15 | 15 | 15 | 25  | 84.784 | 1441800000 | 1482400000 | 1508000000 | 1615200000  | 1642600000  | 1888100000 |
| sp O6057 EIF4E2   | sp O6057 | 1  | 1  | 1  | 1  | 6.5 | 28.362 | 0          | 0          | 0          | 0           | 0           | 33689000   |
| sp O6061 DIAPH1   | sp O6061 | 1  | 25 | 25 | 25 | 23  | 141.35 | 2259700000 | 2549000000 | 2420800000 | 2585900000  | 2150100000  | 2359300000 |
| sp O6061 SELENOF  | sp O6061 | 1  | 2  | 2  | 2  | 18  | 18.092 | 0          | 157750000  | 0          | 0           | 0           | 0          |
| sp O6064 EXOC3    | sp O6064 | 1  | 2  | 2  | 2  | 4.4 | 86.844 | 111000000  | 74041000   | 96934000   | 100990000   | 85383000    | 69222000   |
| sp O6066 PLIN3    | sp O6066 | 1  | 17 | 17 | 17 | 60  | 47.074 | 3812100000 | 4251900000 | 3759100000 | 3508100000  | 3846600000  | 4140900000 |
| sp O6066 SLC16A7  | sp O6066 | 1  | 1  | 1  | 1  | 2.3 | 52.2   | 0          | 0          | 0          | 0           | 49001000    | 0          |
| sp O6067 RAD1     | sp O6067 | 1  | 3  | 3  | 3  | 18  | 31.827 | 40935000   | 104490000  | 60904000   | 127250000   | 0           | 80117000   |
| sp O6067 PRMT3    | sp O6067 | 1  | 7  | 7  | 7  | 16  | 59.902 | 290930000  | 228470000  | 0          | 0           | 0           | 383780000  |
| sp O6068 KPNA6    | sp O6068 | 2  | 9  | 9  | 6  | 19  | 60.029 | 1136700000 | 1245800000 | 1089100000 | 1065400000  | 1132400000  | 1216500000 |
| sp O6070 UGDH     | sp O6070 | 1  | 26 | 26 | 26 | 71  | 55.023 | 7067900000 | 7299300000 | 6838600000 | 8385000000  | 8157500000  | 8728900000 |
| sp O6071 CTNND1   | sp O6071 | 1  | 23 | 23 | 23 | 36  | 108.17 | 1955500000 | 1784000000 | 1677100000 | 1572200000  | 1830300000  | 1855400000 |
| sp O6073 EIF1B    | sp O6073 | 1  | 5  | 1  | 1  | 65  | 12.823 | 0          | 0          | 0          | 0           | 95568000    | 0          |
| sp O6074 SNX2     | sp O6074 | 1  | 10 | 10 | 8  | 21  | 58.47  | 814140000  | 672020000  | 929280000  | 723700000   | 722590000   | 778840000  |
| sp O6076 DPM1     | sp O6076 | 1  | 6  | 6  | 6  | 25  | 29.634 | 502020000  | 520820000  | 417710000  | 550130000   | 719640000   | 628840000  |
| sp O6076 USO1     | sp O6076 | 1  | 20 | 20 | 20 | 29  | 107.89 | 1596400000 | 1421800000 | 1789600000 | 1650000000  | 1832600000  | 1615900000 |
| sp O6078 MRPS14   | sp O6078 | 1  | 2  | 2  | 2  | 22  | 15.139 | 127170000  | 0          | 68084000   | 100830000   | 162580000   | 0          |
| sp O6078 TOM1     | sp O6078 | 1  | 5  | 5  | 5  | 21  | 53.818 | 158180000  | 0          | 194450000  | 151910000   | 180700000   | 0          |
| sp Q9988 HIST1H2B | sp Q9988 | 10 | 6  | 2  | 2  | 41  | 13.952 | 2.2808E+10 | 2.4119E+10 | 2.3629E+10 | 24370000000 | 30931000000 | 3.2391E+10 |
| sp O6082 CCDC22   | sp O6082 | 1  | 8  | 8  | 8  | 23  | 70.755 | 365040000  | 427880000  | 313800000  | 299280000   | 316840000   | 296710000  |
| sp O6082 PQBP1    | sp O6082 | 1  | 6  | 6  | 6  | 41  | 30.472 | 319940000  | 311990000  | 410400000  | 359810000   | 316510000   | 299490000  |
| sp O6083 TIMM17B  | sp O6083 | 1  | 1  | 1  | 1  | 8.7 | 18.273 | 0          | 0          | 0          | 0           | 50857000    | 0          |
| sp O6083 PRAF2    | sp O6083 | 1  | 3  | 3  | 3  | 20  | 19.258 | 168190000  | 361980000  | 276320000  | 428270000   | 219460000   | 276000000  |
| sp O6083 DKC1     | sp O6083 | 1  | 19 | 19 | 19 | 43  | 57.673 | 2046800000 | 2095800000 | 2020800000 | 1889800000  | 2033800000  | 2138600000 |
| sp O6084 EIF5B    | sp O6084 | 1  | 25 | 25 | 25 | 27  | 138.83 | 3978000000 | 3672700000 | 4040800000 | 3693700000  | 3623900000  | 3717200000 |
| sp O6086 EDF1     | sp O6086 | 1  | 7  | 7  | 7  | 49  | 16.368 | 3103600000 | 3768200000 | 3657700000 | 3461500000  | 3794600000  | 3065400000 |
| sp O6088 DNAJA2   | sp O6088 | 1  | 11 | 11 | 11 | 40  | 45.745 | 1281600000 | 1416900000 | 1349600000 | 1442500000  | 1249100000  | 1279800000 |
| sp O6088 BRD4     | sp O6088 | 1  | 3  | 3  | 3  | 3   | 152.22 | 0          | 0          | 0          | 0           | 116810000   | 0          |
| sp O6088 CUTA     | sp O6088 | 1  | 3  | 3  | 3  | 33  | 19.116 | 385820000  | 477950000  | 513960000  | 720780000   | 549090000   | 0          |
| sp O6092 HUS1     | sp O6092 | 1  | 1  | 1  | 1  | 7.1 | 31.691 | 0          | 0          | 0          | 0           | 0           | 37492000   |

|                  |          |   |    |     |    |     |        |            |            |            |             |             |            |
|------------------|----------|---|----|-----|----|-----|--------|------------|------------|------------|-------------|-------------|------------|
| sp O6092 PFDN1   | sp O6092 | 1 | 7  | 7   | 7  | 62  | 14.21  | 826050000  | 743170000  | 594880000  | 707500000   | 659280000   | 719000000  |
| sp O6093 NBN     | sp O6093 | 1 | 3  | 3   | 3  | 6.1 | 84.958 | 0          | 0          | 0          | 0           | 95769000    | 0          |
| sp O6093 NOL3    | sp O6093 | 1 | 4  | 4   | 4  | 36  | 22.629 | 318310000  | 371860000  | 281030000  | 354110000   | 316160000   | 250790000  |
| sp O6094 RNGTT   | sp O6094 | 1 | 2  | 2   | 2  | 4.4 | 68.556 | 0          | 0          | 0          | 0           | 56502000    | 0          |
| sp O7502 ABCB7   | sp O7502 | 1 | 6  | 6   | 6  | 9.8 | 82.64  | 342160000  | 440020000  | 436490000  | 427100000   | 375750000   | 489420000  |
| sp O7508 WDR1    | sp O7508 | 1 | 31 | 31  | 31 | 65  | 66.193 | 1.4511E+10 | 1.4237E+10 | 1.4634E+10 | 13875000000 | 14240000000 | 1.4432E+10 |
| sp O7511 ROCK2   | sp O7511 | 1 | 21 | 21  | 17 | 20  | 160.9  | 1245300000 | 909400000  | 1133600000 | 1079400000  | 915010000   | 994740000  |
| sp O7512 CLASP2  | sp O7512 | 1 | 11 | 11  | 9  | 12  | 141.13 | 847540000  | 721610000  | 767840000  | 714820000   | 810630000   | 754550000  |
| sp O7513 CPNE3   | sp O7513 | 5 | 10 | 10  | 9  | 27  | 60.13  | 1248500000 | 1451400000 | 1163400000 | 1480200000  | 1570300000  | 1310400000 |
| sp O7514 HIP1R   | sp O7514 | 1 | 1  | 1   | 1  | 1   | 119.39 | 0          | 0          | 0          | 0           | 0           | 26301000   |
| sp O7515 RNF40   | sp O7515 | 1 | 7  | 5   | 5  | 8.5 | 113.65 | 204070000  | 165340000  | 0          | 0           | 0           | 0          |
| sp O7515 ZC3H11A | sp O7515 | 2 | 5  | 5   | 5  | 11  | 89.13  | 235720000  | 333510000  | 281920000  | 239090000   | 165490000   | 312620000  |
| sp O7515 CLUH    | sp O7515 | 1 | 21 | 21  | 21 | 26  | 146.67 | 1263400000 | 1265000000 | 1276600000 | 1224100000  | 1350900000  | 1272600000 |
| sp O7516 DNAJC13 | sp O7516 | 1 | 9  | 9   | 9  | 7   | 254.41 | 237660000  | 222750000  | 269860000  | 175830000   | 224660000   | 261080000  |
| sp O7517 CNOT3   | sp O7517 | 1 | 3  | 3   | 3  | 9   | 81.871 | 86005000   | 90089000   | 72442000   | 91121000    | 87962000    | 79347000   |
| sp O7517 ANKRD17 | sp O7517 | 1 | 10 | 6   | 6  | 6.7 | 274.25 | 0          | 84994000   | 129830000  | 69487000    | 144090000   | 0          |
| sp O7519 DNAJB6  | sp O7519 | 2 | 2  | 2   | 2  | 7.4 | 36.087 | 0          | 0          | 0          | 0           | 0           | 73895000   |
| sp O7520 COQ9    | sp O7520 | 1 | 3  | 3   | 3  | 13  | 35.509 | 0          | 0          | 0          | 0           | 0           | 179510000  |
| sp O7522 GGCT    | sp O7522 | 1 | 6  | 6   | 6  | 37  | 21.007 | 1064300000 | 564550000  | 790030000  | 895290000   | 1108800000  | 934190000  |
| sp O7530 NDUFS2  | sp O7530 | 1 | 10 | 10  | 10 | 32  | 52.545 | 568280000  | 644860000  | 530730000  | 475510000   | 505800000   | 486690000  |
| sp O7531 ZPR1    | sp O7531 | 1 | 4  | 4   | 4  | 15  | 50.925 | 157920000  | 201750000  | 175140000  | 153430000   | 174460000   | 0          |
| sp O7533 HMMR    | sp O7533 | 1 | 4  | 4   | 4  | 8.1 | 84.099 | 153400000  | 122700000  | 0          | 198840000   | 105410000   | 145670000  |
| sp O7534 PDCD6   | sp O7534 | 1 | 7  | 7   | 7  | 56  | 21.868 | 1604300000 | 1369000000 | 1814100000 | 1921600000  | 1787600000  | 1695400000 |
| sp O7534 TBCA    | sp O7534 | 1 | 8  | 8   | 8  | 58  | 12.855 | 4275800000 | 4813400000 | 4029600000 | 3332900000  | 3625500000  | 4203400000 |
| sp O7534 ATP6V1G | sp O7534 | 2 | 3  | 3   | 3  | 34  | 13.757 | 404100000  | 385390000  | 387500000  | 470370000   | 505920000   | 303460000  |
| sp O7535 VPS4B   | sp O7535 | 2 | 8  | 8   | 7  | 28  | 49.301 | 354530000  | 418740000  | 460750000  | 364070000   | 432410000   | 360040000  |
| sp O7535 MPDU1   | sp O7535 | 1 | 1  | 1   | 1  | 4   | 26.638 | 0          | 0          | 0          | 0           | 0           | 244170000  |
| sp O7536 H2AFY   | sp O7536 | 2 | 15 | 15  | 15 | 47  | 39.617 | 6625500000 | 7914600000 | 5783400000 | 7643800000  | 7294000000  | 8029700000 |
| sp O7536 SH3BGR1 | sp O7536 | 1 | 8  | 8   | 8  | 79  | 12.774 | 1473200000 | 1784200000 | 1430200000 | 1215500000  | 1412000000  | 1222900000 |
| sp O7536 FLNB    | sp O7536 | 1 | ## | 144 | ## | 76  | 278.16 | 9.9145E+10 | 9.6166E+10 | 9.5536E+10 | 94756000000 | 92449000000 | 1.0528E+11 |
| sp O7537 NCOR1   | sp O7537 | 1 | 4  | 4   | 4  | 2.7 | 270.21 | 25315000   | 56189000   | 0          | 26622000    | 77675000    | 0          |
| sp O7538 PEX14   | sp O7538 | 1 | 2  | 2   | 2  | 5.6 | 41.236 | 153030000  | 128870000  | 141730000  | 124590000   | 0           | 0          |
| sp O7539 CS      | sp O7539 | 1 | 12 | 12  | 12 | 29  | 51.712 | 5950600000 | 4801800000 | 4563000000 | 5943800000  | 6447500000  | 5281000000 |
| sp O7539 SPAG7   | sp O7539 | 1 | 6  | 6   | 6  | 41  | 26.034 | 401040000  | 508880000  | 461530000  | 302600000   | 326410000   | 307130000  |
| sp O7539 SEC22B  | sp O7539 | 1 | 7  | 7   | 7  | 38  | 24.593 | 4389000000 | 3483600000 | 3757100000 | 4551400000  | 4328900000  | 4518500000 |
| sp O7540 PRPF40A | sp O7540 | 1 | 6  | 6   | 6  | 7.5 | 108.8  | 431370000  | 465340000  | 388950000  | 462670000   | 354970000   | 404830000  |
| sp O7541 TACC1   | sp O7541 | 2 | 3  | 3   | 3  | 6.2 | 87.793 | 0          | 0          | 0          | 0           | 0           | 27395000   |
| sp O7541 NME6    | sp O7541 | 1 | 1  | 1   | 1  | 7.5 | 21.142 | 0          | 0          | 0          | 0           | 0           | 79443000   |
| sp O7543 MTX2    | sp O7543 | 1 | 5  | 5   | 5  | 31  | 29.763 | 356940000  | 339210000  | 392130000  | 418930000   | 480960000   | 466130000  |

|                  |          |   |    |    |    |     |        |            |            |            |            |            |            |
|------------------|----------|---|----|----|----|-----|--------|------------|------------|------------|------------|------------|------------|
| sp O7543 VPS26A  | sp O7543 | 1 | 7  | 7  | 7  | 31  | 38.169 | 1289800000 | 1127500000 | 1529500000 | 1338700000 | 1405000000 | 1245700000 |
| sp O7543 NDUFB1  | sp O7543 | 1 | 1  | 1  | 1  | 19  | 6.9611 | 0          | 0          | 0          | 0          | 0          | 91808000   |
| sp O7543 PMPCB   | sp O7543 | 1 | 18 | 18 | 17 | 44  | 54.366 | 1714700000 | 1504100000 | 1449900000 | 1522100000 | 1631900000 | 1620500000 |
| sp O7544 MED24   | sp O7544 | 1 | 3  | 3  | 3  | 4.6 | 110.3  | 30055000   | 0          | 0          | 0          | 0          | 0          |
| sp O7547 PSIP1   | sp O7547 | 1 | 13 | 12 | 12 | 28  | 60.103 | 2297100000 | 2659500000 | 2337400000 | 2520300000 | 2206800000 | 2421100000 |
| sp O7547 ERLIN1  | sp O7547 | 1 | 5  | 3  | 3  | 19  | 38.925 | 0          | 265440000  | 234220000  | 424440000  | 304330000  | 265790000  |
| sp O7548 NDUFS3  | sp O7548 | 1 | 7  | 7  | 7  | 31  | 30.241 | 744430000  | 755260000  | 903630000  | 722630000  | 701430000  | 646930000  |
| sp O7549 SRSF10  | sp O7549 | 1 | 4  | 4  | 4  | 13  | 31.3   | 601150000  | 506500000  | 617500000  | 608440000  | 488550000  | 637870000  |
| sp O7550 HSBP1   | sp O7550 | 1 | 3  | 3  | 3  | 42  | 8.5435 | 535310000  | 540420000  | 475730000  | 482670000  | 0          | 421260000  |
| sp O7552 ECI2    | sp O7552 | 1 | 11 | 11 | 11 | 43  | 43.585 | 682880000  | 764490000  | 771240000  | 821860000  | 861600000  | 671960000  |
| sp O7553 EED     | sp O7553 | 1 | 3  | 3  | 3  | 8.6 | 50.197 | 0          | 0          | 115450000  | 0          | 0          | 0          |
| sp O7553 BANF1   | sp O7553 | 1 | 6  | 6  | 6  | 53  | 10.058 | 5219800000 | 5912900000 | 4745600000 | 5439300000 | 7658500000 | 6221600000 |
| sp O7553 SF3B1   | sp O7553 | 1 | 40 | 40 | 40 | 42  | 145.83 | 6661000000 | 7548200000 | 7104700000 | 6543800000 | 6730400000 | 7160400000 |
| sp O7553 CSDE1   | sp O7553 | 1 | 24 | 24 | 24 | 33  | 88.884 | 2434300000 | 2387400000 | 2239500000 | 2183900000 | 2118900000 | 2365800000 |
| sp O7556 PRKRA   | sp O7556 | 1 | 4  | 4  | 4  | 20  | 34.404 | 149040000  | 202850000  | 150820000  | 244390000  | 208950000  | 244570000  |
| sp O7560 NPM3    | sp O7560 | 1 | 5  | 5  | 5  | 54  | 19.343 | 497220000  | 668130000  | 473740000  | 697620000  | 644750000  | 547220000  |
| sp O7560 LYPLA1  | sp O7560 | 1 | 2  | 2  | 2  | 16  | 24.669 | 0          | 192850000  | 105310000  | 253980000  | 0          | 0          |
| sp O7561 ERAL1   | sp O7561 | 1 | 4  | 4  | 4  | 15  | 48.349 | 225840000  | 0          | 211490000  | 255650000  | 0          | 0          |
| sp O7564 SNRNP20 | sp O7564 | 1 | 68 | 68 | 68 | 39  | 244.5  | 8356700000 | 8145000000 | 8602800000 | 7749400000 | 8142700000 | 8209600000 |
| sp O7566 TIPRL   | sp O7566 | 1 | 7  | 7  | 7  | 38  | 31.444 | 440070000  | 409720000  | 453070000  | 456920000  | 585710000  | 349230000  |
| sp O7568 SURF6   | sp O7568 | 1 | 2  | 2  | 2  | 12  | 41.45  | 0          | 0          | 0          | 0          | 0          | 183260000  |
| sp O7568 PPM1B   | sp O7568 | 2 | 2  | 2  | 2  | 5.8 | 52.642 | 65041000   | 0          | 0          | 52917000   | 0          | 0          |
| sp O7569 UTP20   | sp O7569 | 1 | 18 | 18 | 18 | 7.6 | 318.38 | 543140000  | 790600000  | 622170000  | 652770000  | 559440000  | 536920000  |
| sp O7569 NUP155  | sp O7569 | 1 | 31 | 31 | 31 | 32  | 155.2  | 4571900000 | 5189300000 | 4382900000 | 5101400000 | 5172000000 | 5066700000 |
| sp O7569 RP2     | sp O7569 | 1 | 2  | 2  | 2  | 5.4 | 39.641 | 0          | 0          | 0          | 0          | 0          | 61006000   |
| sp O7571 WDHD1   | sp O7571 | 1 | 9  | 9  | 9  | 11  | 125.97 | 227730000  | 267260000  | 269030000  | 258610000  | 217110000  | 218030000  |
| sp O7571 CRTAP   | sp O7571 | 1 | 13 | 13 | 13 | 34  | 46.561 | 957560000  | 972630000  | 1050800000 | 1096200000 | 1282600000 | 1037400000 |
| sp O7574 SLC25A1 | sp O7574 | 1 | 13 | 10 | 10 | 22  | 74.761 | 388360000  | 329940000  | 302210000  | 353310000  | 278620000  | 252190000  |
| sp O7578 ATP6AP2 | sp O7578 | 1 | 3  | 3  | 3  | 10  | 39.008 | 0          | 55944000   | 0          | 0          | 60302000   | 0          |
| sp O7579 RNASEH2 | sp O7579 | 1 | 3  | 3  | 3  | 13  | 33.395 | 0          | 0          | 0          | 0          | 77953000   | 0          |
| sp O7579 CDC123  | sp O7579 | 1 | 9  | 9  | 9  | 30  | 39.134 | 552370000  | 351470000  | 551780000  | 342690000  | 567130000  | 474750000  |
| sp O7581 BCAR3   | sp O7581 | 1 | 2  | 2  | 2  | 4.6 | 92.565 | 0          | 0          | 55427000   | 52130000   | 0          | 0          |
| sp O7581 RPP40   | sp O7581 | 1 | 6  | 6  | 6  | 26  | 41.833 | 260910000  | 284840000  | 282090000  | 312690000  | 224220000  | 313720000  |
| sp O7582 EIF3G   | sp O7582 | 1 | 13 | 13 | 13 | 41  | 35.611 | 2946600000 | 3600800000 | 3097100000 | 3438300000 | 3271300000 | 2596900000 |
| sp O7582 EIF3J   | sp O7582 | 1 | 12 | 12 | 12 | 52  | 29.062 | 3476600000 | 3357700000 | 2795100000 | 3763900000 | 3573700000 | 3079000000 |
| sp O7582 CBR3    | sp O7582 | 1 | 5  | 3  | 3  | 24  | 30.85  | 257710000  | 213000000  | 242040000  | 239670000  | 298320000  | 310650000  |
| sp O7583 PSMD10  | sp O7583 | 1 | 3  | 3  | 3  | 15  | 24.428 | 663530000  | 548180000  | 668920000  | 506690000  | 609560000  | 553130000  |
| sp O7584 ZMPSTE2 | sp O7584 | 1 | 8  | 8  | 8  | 21  | 54.812 | 760700000  | 774550000  | 829890000  | 810880000  | 746730000  | 843460000  |
| sp O7587 IDH1    | sp O7587 | 1 | 18 | 18 | 18 | 48  | 46.659 | 3824100000 | 4284700000 | 4949300000 | 4318300000 | 3567000000 | 3302500000 |

|                  |          |   |    |    |    |     |        |            |            |            |            |            |            |
|------------------|----------|---|----|----|----|-----|--------|------------|------------|------------|------------|------------|------------|
| sp O7588 STAM2   | sp O7588 | 1 | 1  | 1  | 1  | 2.7 | 58.164 | 0          | 0          | 0          | 0          | 89061000   | 0          |
| sp O7590 DGAT1   | sp O7590 | 1 | 1  | 1  | 1  | 3.3 | 55.278 | 0          | 0          | 0          | 0          | 0          | 38241000   |
| sp O7590 CCNK    | sp O7590 | 1 | 3  | 3  | 3  | 5.3 | 64.239 | 0          | 0          | 0          | 0          | 73204000   | 0          |
| sp O7591 ARL6IP5 | sp O7591 | 1 | 5  | 5  | 5  | 25  | 21.614 | 1130000000 | 1523500000 | 1436900000 | 1540900000 | 1281100000 | 1608400000 |
| sp O7593 BCAS2   | sp O7593 | 1 | 11 | 11 | 11 | 69  | 26.131 | 923520000  | 1309100000 | 953180000  | 979210000  | 1132200000 | 958130000  |
| sp O7593 DCTN3   | sp O7593 | 1 | 6  | 6  | 6  | 23  | 21.119 | 684800000  | 844730000  | 537670000  | 607880000  | 633430000  | 613380000  |
| sp O7593 DNAJC8  | sp O7593 | 1 | 8  | 8  | 8  | 36  | 29.841 | 1824700000 | 2166100000 | 1591500000 | 1270900000 | 1159600000 | 1260500000 |
| sp O7594 SMNDC1  | sp O7594 | 1 | 5  | 5  | 5  | 38  | 26.711 | 434020000  | 420150000  | 404280000  | 485300000  | 438510000  | 449920000  |
| sp O7594 ATP5H   | sp O7594 | 1 | 11 | 11 | 11 | 73  | 18.491 | 2454300000 | 3073600000 | 3048300000 | 3359500000 | 3813800000 | 4948900000 |
| sp O7595 FLOT1   | sp O7595 | 1 | 10 | 10 | 10 | 33  | 47.355 | 803280000  | 895710000  | 1087500000 | 812230000  | 1053900000 | 1116500000 |
| sp O7596 TRIO    | sp O7596 | 2 | 22 | 22 | 22 | 10  | 346.9  | 480260000  | 472310000  | 491730000  | 449780000  | 517580000  | 472210000  |
| sp O7596 ATP5L   | sp O7596 | 1 | 4  | 4  | 4  | 38  | 11.428 | 1991900000 | 1217300000 | 1144400000 | 1242500000 | 1745200000 | 1031300000 |
| sp O7600 GLRX3   | sp O7600 | 1 | 11 | 11 | 11 | 46  | 37.432 | 2769100000 | 2169000000 | 3196300000 | 2211400000 | 2676200000 | 2732600000 |
| sp O7602 RSL1D1  | sp O7602 | 1 | 16 | 16 | 16 | 32  | 54.972 | 3799700000 | 4112100000 | 4468400000 | 4337500000 | 4072700000 | 4623700000 |
| sp O7603 CLPX    | sp O7603 | 1 | 11 | 11 | 11 | 23  | 69.223 | 614840000  | 453080000  | 437800000  | 798340000  | 386560000  | 653980000  |
| sp O7607 SNCG    | sp O7607 | 1 | 8  | 8  | 8  | 72  | 13.331 | 922140000  | 762880000  | 907650000  | 721590000  | 1005500000 | 887910000  |
| sp O7607 CIAO1   | sp O7607 | 1 | 6  | 6  | 6  | 27  | 37.84  | 288510000  | 274080000  | 331680000  | 277800000  | 307130000  | 313010000  |
| sp O7609 SRP72   | sp O7609 | 1 | 20 | 20 | 20 | 41  | 74.605 | 2260600000 | 2185000000 | 1968900000 | 1989300000 | 2475900000 | 1795400000 |
| sp O9476 DDAH1   | sp O9476 | 1 | 8  | 8  | 8  | 39  | 31.121 | 398940000  | 381450000  | 428270000  | 403000000  | 407880000  | 382690000  |
| sp O9477 MTA2    | sp O9477 | 1 | 17 | 17 | 15 | 34  | 75.022 | 1779600000 | 2063400000 | 1920400000 | 1923000000 | 2010000000 | 2020200000 |
| sp O9478 ALDH1A2 | sp O9478 | 1 | 3  | 2  | 2  | 7.3 | 56.723 | 0          | 142900000  | 88696000   | 142510000  | 148030000  | 153960000  |
| sp O9480 STK10   | sp O9480 | 1 | 3  | 3  | 3  | 3.6 | 112.13 | 0          | 0          | 0          | 0          | 21789000   | 0          |
| sp O9480 GFPT2   | sp O9480 | 1 | 9  | 6  | 6  | 14  | 76.93  | 1597700000 | 730750000  | 1371800000 | 1472600000 | 1463000000 | 1827700000 |
| sp O9482 LTN1    | sp O9482 | 1 | 3  | 3  | 3  | 2.8 | 200.55 | 89197000   | 75110000   | 48758000   | 75340000   | 0          | 64509000   |
| sp O9482 TOMM70  | sp O9482 | 1 | 19 | 19 | 19 | 49  | 67.454 | 2074600000 | 1953100000 | 2063900000 | 2484500000 | 2324800000 | 2478500000 |
| sp O9484 TOX4    | sp O9484 | 3 | 2  | 2  | 2  | 4.3 | 66.194 | 37300000   | 0          | 0          | 0          | 0          | 0          |
| sp O9485 SEC24D  | sp O9485 | 1 | 10 | 10 | 10 | 16  | 113.01 | 539770000  | 606100000  | 586410000  | 530360000  | 600630000  | 577440000  |
| sp O9487 UFL1    | sp O9487 | 1 | 9  | 9  | 9  | 15  | 89.594 | 127170000  | 146260000  | 171250000  | 266790000  | 225130000  | 196290000  |
| sp O9488 FARP2   | sp O9488 | 1 | 2  | 2  | 2  | 2.7 | 119.89 | 0          | 213890000  | 160110000  | 0          | 0          | 0          |
| sp O9488 UBXN7   | sp O9488 | 1 | 5  | 5  | 5  | 12  | 54.862 | 117100000  | 135380000  | 107120000  | 129220000  | 121420000  | 98874000   |
| sp O9490 SUN1    | sp O9490 | 1 | 7  | 7  | 7  | 11  | 90.063 | 0          | 184660000  | 191970000  | 328200000  | 0          | 137500000  |
| sp O9490 PLPBP   | sp O9490 | 1 | 1  | 1  | 1  | 6.2 | 30.344 | 0          | 0          | 0          | 0          | 0          | 32230000   |
| sp O9490 ERLIN2  | sp O9490 | 1 | 7  | 7  | 5  | 27  | 37.839 | 669160000  | 759260000  | 0          | 683650000  | 692500000  | 741030000  |
| sp O9490 PRPF6   | sp O9490 | 1 | 26 | 26 | 26 | 34  | 106.92 | 2717000000 | 2221700000 | 2174900000 | 2252400000 | 2514900000 | 3017100000 |
| sp O9491 FRYL    | sp O9491 | 1 | 3  | 3  | 3  | 1.6 | 339.59 | 438490000  | 0          | 0          | 70806000   | 0          | 0          |
| sp O9491 ENDOD1  | sp O9491 | 1 | 1  | 1  | 1  | 2.6 | 55.016 | 0          | 0          | 0          | 0          | 0          | 0          |
| sp O9492 GLS     | sp O9492 | 1 | 19 | 19 | 19 | 38  | 73.46  | 5859900000 | 4821200000 | 6267100000 | 5649500000 | 5691100000 | 6147100000 |
| sp O9496 USP19   | sp O9496 | 1 | 3  | 3  | 3  | 4.2 | 145.65 | 0          | 0          | 0          | 0          | 0          | 182870000  |
| sp O9497 AP2A2   | sp O9497 | 1 | 13 | 6  | 6  | 20  | 103.96 | 152230000  | 105520000  | 159390000  | 126670000  | 117310000  | 117930000  |

|                   |           |   |    |    |    |     |        |            |            |            |            |            |            |
|-------------------|-----------|---|----|----|----|-----|--------|------------|------------|------------|------------|------------|------------|
| sp O94979 SEC31A  | sp O94979 | 1 | 25 | 25 | 25 | 25  | 133.01 | 2586300000 | 2897900000 | 2446500000 | 2472400000 | 2413500000 | 2574000000 |
| sp O94999 HEXIM1  | sp O94999 | 1 | 7  | 7  | 7  | 37  | 40.623 | 448280000  | 591030000  | 443460000  | 426380000  | 600680000  | 438620000  |
| sp O95059 RPP14   | sp O95059 | 1 | 3  | 3  | 3  | 38  | 13.693 | 0          | 0          | 0          | 152520000  | 0          | 0          |
| sp O95069 CCNB2   | sp O95069 | 1 | 3  | 3  | 3  | 10  | 45.281 | 0          | 0          | 0          | 0          | 45630000   | 0          |
| sp O95079 YIF1A   | sp O95079 | 1 | 3  | 3  | 3  | 13  | 32.011 | 405110000  | 500720000  | 372820000  | 494500000  | 416970000  | 462280000  |
| sp O95079 UBR5    | sp O95079 | 1 | 8  | 8  | 8  | 4.7 | 309.35 | 85228000   | 139670000  | 101290000  | 162240000  | 126530000  | 119030000  |
| sp O95139 NDUFB6  | sp O95139 | 1 | 3  | 3  | 3  | 30  | 15.489 | 575820000  | 518130000  | 510770000  | 271960000  | 473710000  | 495530000  |
| sp O95149 MFN2    | sp O95149 | 1 | 8  | 8  | 8  | 14  | 86.401 | 238210000  | 123640000  | 292850000  | 260500000  | 153050000  | 192570000  |
| sp O95149 DUSP14  | sp O95149 | 1 | 1  | 1  | 1  | 11  | 22.255 | 0          | 0          | 0          | 0          | 0          | 16567000   |
| sp O95149 SNUPN   | sp O95149 | 1 | 2  | 2  | 2  | 10  | 41.142 | 0          | 0          | 0          | 0          | 79421000   | 0          |
| sp O95159 UBE4B   | sp O95159 | 1 | 15 | 15 | 15 | 19  | 146.18 | 681380000  | 532900000  | 723270000  | 560670000  | 499420000  | 682860000  |
| sp O95159 ZFPL1   | sp O95159 | 1 | 3  | 3  | 3  | 14  | 34.114 | 59029000   | 0          | 65046000   | 0          | 159840000  | 0          |
| sp O95169 ELP1    | sp O95169 | 1 | 14 | 14 | 14 | 15  | 150.25 | 1178200000 | 823350000  | 1284900000 | 915990000  | 1003100000 | 1013400000 |
| sp O95169 GABARA  | sp O95169 | 1 | 2  | 2  | 1  | 15  | 13.918 | 0          | 0          | 0          | 0          | 0          | 234760000  |
| sp O95169 NDUFB4  | sp O95169 | 1 | 3  | 3  | 3  | 31  | 15.208 | 171680000  | 157020000  | 211990000  | 160090000  | 261010000  | 0          |
| sp O95169 NDUFB8  | sp O95169 | 1 | 2  | 2  | 2  | 11  | 21.766 | 0          | 0          | 0          | 0          | 0          | 69943000   |
| sp O95199 RTN3    | sp O95199 | 1 | 2  | 2  | 2  | 4.8 | 112.61 | 363400000  | 603200000  | 432990000  | 428280000  | 435960000  | 438490000  |
| sp O95209 LETM1   | sp O95209 | 1 | 19 | 19 | 19 | 33  | 83.353 | 1652700000 | 1499200000 | 2015000000 | 1994000000 | 1853400000 | 1887300000 |
| sp O95219 ZRANB2  | sp O95219 | 1 | 11 | 11 | 11 | 31  | 37.404 | 1016200000 | 1271800000 | 870810000  | 959520000  | 1083000000 | 1075800000 |
| sp O95219 SNX4    | sp O95219 | 1 | 2  | 2  | 2  | 5.1 | 51.908 | 0          | 0          | 0          | 66230000   | 0          | 0          |
| sp O95239 LUC7L3  | sp O95239 | 1 | 12 | 12 | 12 | 30  | 51.466 | 1246100000 | 1413500000 | 1354400000 | 967940000  | 1135600000 | 1458000000 |
| sp O95239 KIF20A  | sp O95239 | 1 | 12 | 12 | 12 | 21  | 100.28 | 315360000  | 246330000  | 209810000  | 322040000  | 220440000  | 253940000  |
| sp O95239 KIF4A   | sp O95239 | 3 | 11 | 11 | 5  | 11  | 139.88 | 616310000  | 390720000  | 494250000  | 670820000  | 631540000  | 356090000  |
| sp O95249 SBF1    | sp O95249 | 1 | 2  | 2  | 2  | 0.9 | 208.44 | 0          | 0          | 0          | 0          | 0          | 118090000  |
| sp O95259 KAT7    | sp O95259 | 3 | 4  | 4  | 4  | 10  | 70.642 | 176960000  | 0          | 0          | 223540000  | 191760000  | 0          |
| sp O95269 ATE1    | sp O95269 | 1 | 2  | 2  | 2  | 8.3 | 59.09  | 0          | 0          | 0          | 131510000  | 0          | 141000000  |
| sp O95279 CCNDBP  | sp O95279 | 1 | 1  | 1  | 1  | 3.6 | 40.262 | 0          | 0          | 29156000   | 0          | 0          | 0          |
| sp O95299 VAPB    | sp O95299 | 1 | 10 | 9  | 9  | 43  | 27.228 | 1254100000 | 1379200000 | 1070300000 | 1302800000 | 1435500000 | 1237700000 |
| sp O95299 SNAPIN  | sp O95299 | 1 | 2  | 2  | 2  | 18  | 14.874 | 115890000  | 0          | 139270000  | 98012000   | 118820000  | 104340000  |
| sp O95299 MPZL1   | sp O95299 | 1 | 3  | 3  | 3  | 20  | 29.082 | 271950000  | 222650000  | 0          | 202010000  | 245880000  | 270100000  |
| sp O95299 NDUFA10 | sp O95299 | 1 | 3  | 3  | 3  | 14  | 40.75  | 0          | 0          | 294610000  | 0          | 0          | 248980000  |
| sp O95309 FKBP9   | sp O95309 | 2 | 9  | 9  | 9  | 18  | 63.083 | 2649800000 | 3219000000 | 2960900000 | 3011700000 | 2384500000 | 3002700000 |
| sp O95339 PGLS    | sp O95339 | 1 | 9  | 9  | 9  | 52  | 27.547 | 913280000  | 777450000  | 797780000  | 892680000  | 931530000  | 462020000  |
| sp O95349 PAPSS2  | sp O95349 | 1 | 9  | 9  | 9  | 17  | 69.5   | 766000000  | 675420000  | 541060000  | 709520000  | 717920000  | 721040000  |
| sp O95349 SMC2    | sp O95349 | 1 | 27 | 27 | 27 | 28  | 135.65 | 2528300000 | 2698900000 | 2723600000 | 2554600000 | 2530500000 | 2448500000 |
| sp O95359 ATG7    | sp O95359 | 1 | 5  | 5  | 5  | 12  | 77.959 | 83663000   | 0          | 182290000  | 139770000  | 0          | 86671000   |
| sp O95369 TRIM16  | sp O95369 | 2 | 18 | 18 | 18 | 42  | 63.954 | 1750700000 | 1705300000 | 1609900000 | 1948900000 | 1978500000 | 1796000000 |
| sp O95369 ZBTB7A  | sp O95369 | 1 | 2  | 2  | 2  | 7.5 | 61.438 | 44500000   | 0          | 0          | 0          | 0          | 0          |
| sp O95379 LYPLA2  | sp O95379 | 1 | 6  | 6  | 6  | 33  | 24.737 | 359170000  | 808900000  | 599900000  | 467450000  | 467260000  | 499170000  |

|                  |          |   |    |    |    |     |        |            |            |            |            |            |            |
|------------------|----------|---|----|----|----|-----|--------|------------|------------|------------|------------|------------|------------|
| sp O9537 IPO7    | sp O9537 | 1 | 24 | 24 | 24 | 28  | 119.52 | 5609200000 | 7162100000 | 6413600000 | 6949400000 | 6321600000 | 5801500000 |
| sp O9537 ARIH2   | sp O9537 | 1 | 5  | 5  | 5  | 15  | 57.818 | 0          | 163820000  | 247360000  | 206700000  | 202340000  | 199490000  |
| sp O9537 TNFAIP8 | sp O9537 | 1 | 2  | 2  | 2  | 14  | 23.003 | 99055000   | 466400000  | 42065000   | 795720000  | 189910000  | 260760000  |
| sp O9539 SLU7    | sp O9539 | 1 | 1  | 1  | 1  | 4.6 | 68.386 | 0          | 0          | 0          | 0          | 0          | 26198000   |
| sp O9539 PGM3    | sp O9539 | 1 | 3  | 3  | 3  | 6.6 | 59.851 | 106350000  | 111970000  | 53469000   | 80373000   | 169750000  | 200270000  |
| sp O9539 MOCS3   | sp O9539 | 1 | 2  | 2  | 2  | 6.7 | 49.669 | 0          | 0          | 0          | 0          | 0          | 80633000   |
| sp O9539 UTS2    | sp O9539 | 1 | 1  | 1  | 1  | 6.5 | 14.295 | 0          | 0          | 0          | 0          | 0          | 2114100000 |
| sp O9540 CD2BP2  | sp O9540 | 1 | 4  | 4  | 4  | 14  | 37.646 | 0          | 228190000  | 0          | 217610000  | 250230000  | 231880000  |
| sp O9540 CNIH1   | sp O9540 | 1 | 2  | 2  | 2  | 20  | 16.699 | 459010000  | 244220000  | 369180000  | 547200000  | 475430000  | 440750000  |
| sp O9541 BRI3    | sp O9541 | 1 | 1  | 1  | 1  | 13  | 13.645 | 0          | 0          | 0          | 32334000   | 0          | 0          |
| sp O9542 SVIL    | sp O9542 | 1 | 6  | 6  | 6  | 4.8 | 247.74 | 187910000  | 248050000  | 192200000  | 0          | 214390000  | 209180000  |
| sp O9542 BAG4    | sp O9542 | 1 | 1  | 1  | 1  | 3.1 | 49.593 | 0          | 0          | 0          | 0          | 70269000   | 0          |
| sp O9543 AHSA1   | sp O9543 | 1 | 14 | 14 | 14 | 53  | 38.274 | 6350400000 | 6184800000 | 4685300000 | 6305900000 | 6249900000 | 5782000000 |
| sp O9545 PARN    | sp O9545 | 1 | 2  | 2  | 2  | 3.8 | 73.45  | 0          | 0          | 0          | 0          | 0          | 51308000   |
| sp O9545 PSMG1   | sp O9545 | 1 | 9  | 9  | 9  | 42  | 32.854 | 620420000  | 670530000  | 706200000  | 568590000  | 673120000  | 634480000  |
| sp O9546 FMNL1   | sp O9546 | 1 | 3  | 3  | 3  | 3.9 | 121.85 | 92301000   | 63721000   | 0          | 59681000   | 70243000   | 74231000   |
| sp O9547 SGPL1   | sp O9547 | 1 | 4  | 4  | 4  | 7.6 | 63.523 | 0          | 80861000   | 89549000   | 182870000  | 0          | 0          |
| sp O9547 NSA2    | sp O9547 | 1 | 4  | 4  | 4  | 16  | 30.065 | 356950000  | 301490000  | 0          | 240210000  | 307420000  | 184420000  |
| sp O9548 SEC24A  | sp O9548 | 1 | 3  | 3  | 3  | 3.3 | 119.75 | 52121000   | 57862000   | 0          | 57253000   | 0          | 48417000   |
| sp O9548 SEC24B  | sp O9548 | 1 | 2  | 2  | 2  | 2.3 | 137.42 | 115610000  | 0          | 0          | 0          | 87135000   | 0          |
| sp O9554 NADK    | sp O9554 | 1 | 1  | 1  | 1  | 3.8 | 49.228 | 0          | 0          | 0          | 0          | 0          | 0          |
| sp O9556 MPC2    | sp O9556 | 1 | 2  | 2  | 2  | 17  | 14.279 | 85382000   | 0          | 93165000   | 89274000   | 0          | 100200000  |
| sp O9557 ETHE1   | sp O9557 | 1 | 2  | 2  | 2  | 17  | 27.873 | 0          | 0          | 0          | 0          | 0          | 137130000  |
| sp O9557 ACSL3   | sp O9557 | 1 | 21 | 21 | 19 | 43  | 80.419 | 3250600000 | 2864200000 | 3057600000 | 3377700000 | 3174200000 | 3722500000 |
| sp O9560 POLR1A  | sp O9560 | 1 | 4  | 4  | 4  | 4   | 194.81 | 113260000  | 82121000   | 90894000   | 82843000   | 133240000  | 97690000   |
| sp O9563 CPSF4   | sp O9563 | 1 | 3  | 3  | 3  | 13  | 30.255 | 97226000   | 0          | 0          | 0          | 0          | 0          |
| sp O9567 CDS2    | sp O9567 | 1 | 1  | 1  | 1  | 4.3 | 51.417 | 0          | 0          | 0          | 0          | 38571000   | 0          |
| sp O9567 EYA4    | sp O9567 | 1 | 2  | 2  | 2  | 4.7 | 69.504 | 0          | 0          | 0          | 0          | 0          | 45973000   |
| sp O9568 FGFR1OF | sp O9568 | 1 | 2  | 2  | 2  | 7.8 | 43.064 | 0          | 64633000   | 87025000   | 69670000   | 0          | 78865000   |
| sp O9574 OXSR1   | sp O9574 | 1 | 14 | 14 | 12 | 34  | 58.022 | 1649100000 | 1803100000 | 1556800000 | 1275500000 | 1661100000 | 1878600000 |
| sp O9575 HSPA4L  | sp O9575 | 1 | 29 | 25 | 25 | 49  | 94.511 | 2246400000 | 2717300000 | 2947100000 | 2651500000 | 2850000000 | 2787200000 |
| sp O9575 PTBP3   | sp O9575 | 1 | 7  | 5  | 5  | 19  | 59.689 | 287510000  | 269850000  | 275590000  | 336170000  | 328600000  | 276330000  |
| sp O9577 LSM8    | sp O9577 | 1 | 3  | 3  | 3  | 38  | 10.403 | 350200000  | 427110000  | 359930000  | 357090000  | 421840000  | 357800000  |
| sp O9578 AP2A1   | sp O9578 | 1 | 25 | 25 | 18 | 35  | 107.54 | 1876200000 | 1930800000 | 2059400000 | 1720400000 | 1682800000 | 1802800000 |
| sp O9578 DDX58   | sp O9578 | 1 | 5  | 5  | 5  | 5.2 | 106.6  | 850930000  | 476790000  | 0          | 480240000  | 640960000  | 0          |
| sp O9580 TTC4    | sp O9580 | 1 | 2  | 2  | 2  | 13  | 44.678 | 0          | 1040400000 | 0          | 0          | 0          | 0          |
| sp O9580 TMEM50A | sp O9580 | 1 | 1  | 1  | 1  | 5.1 | 17.4   | 74624000   | 69792000   | 0          | 0          | 94075000   | 71751000   |
| sp O9581 BAG2    | sp O9581 | 1 | 12 | 12 | 12 | 63  | 23.772 | 3793600000 | 3965300000 | 3564000000 | 4174200000 | 4343800000 | 3847700000 |
| sp O9581 BAG3    | sp O9581 | 1 | 18 | 18 | 18 | 56  | 61.594 | 2054700000 | 2485100000 | 1749200000 | 2621100000 | 1917300000 | 2601600000 |

|                   |           |   |    |    |    |     |        |            |            |            |             |             |            |
|-------------------|-----------|---|----|----|----|-----|--------|------------|------------|------------|-------------|-------------|------------|
| sp O95814 MAP4K4  | sp O95814 | 2 | 3  | 3  | 2  | 3.3 | 142.1  | 0          | 0          | 0          | 0           | 78210000    | 0          |
| sp O95824 CRYZL1  | sp O95824 | 1 | 1  | 1  | 1  | 8   | 38.696 | 0          | 0          | 0          | 0           | 0           | 11832000   |
| sp O95834 AIFM1   | sp O95834 | 1 | 12 | 12 | 12 | 25  | 66.9   | 3003700000 | 2954500000 | 2597400000 | 2594300000  | 2599000000  | 2732200000 |
| sp O95834 CLDN1   | sp O95834 | 1 | 1  | 1  | 1  | 7.1 | 22.744 | 0          | 0          | 0          | 0           | 0           | 78376000   |
| sp O95834 CLIC3   | sp O95834 | 1 | 8  | 8  | 8  | 52  | 26.648 | 657460000  | 897430000  | 537450000  | 663210000   | 706280000   | 827270000  |
| sp O95864 BPNT1   | sp O95864 | 1 | 9  | 9  | 9  | 47  | 33.392 | 474250000  | 516770000  | 559630000  | 467240000   | 513220000   | 713420000  |
| sp O95864 DDAH2   | sp O95864 | 1 | 3  | 3  | 3  | 16  | 29.644 | 111190000  | 0          | 0          | 0           | 75574000    | 0          |
| sp O95884 TXNDC12 | sp O95884 | 1 | 7  | 7  | 7  | 44  | 19.206 | 484810000  | 573590000  | 552100000  | 545210000   | 666540000   | 538330000  |
| sp O95904 ECD     | sp O95904 | 1 | 3  | 3  | 3  | 9   | 72.757 | 76611000   | 77666000   | 84294000   | 57355000    | 64864000    | 65359000   |
| sp O95924 SYF2    | sp O95924 | 1 | 1  | 1  | 1  | 12  | 28.722 | 0          | 0          | 0          | 0           | 0           | 60901000   |
| sp O95984 MBD3    | sp O95984 | 1 | 5  | 5  | 5  | 24  | 32.844 | 0          | 0          | 254660000  | 0           | 0           | 0          |
| sp O95994 BCL10   | sp O95994 | 1 | 2  | 2  | 2  | 20  | 26.251 | 0          | 0          | 0          | 0           | 72650000    | 0          |
| sp O96004 NDUFB10 | sp O96004 | 1 | 4  | 4  | 4  | 28  | 20.776 | 457190000  | 425630000  | 481090000  | 443070000   | 323920000   | 534740000  |
| sp O96004 CLPTM1  | sp O96004 | 1 | 11 | 11 | 11 | 28  | 76.096 | 623860000  | 669680000  | 691960000  | 730830000   | 647710000   | 713290000  |
| sp O96004 MOCS2   | sp O96004 | 1 | 2  | 2  | 2  | 13  | 20.944 | 0          | 0          | 0          | 64249000    | 0           | 0          |
| sp O96004 TOMM40  | sp O96004 | 1 | 8  | 8  | 8  | 39  | 37.893 | 2230400000 | 2298700000 | 2083300000 | 2555900000  | 2505900000  | 2421500000 |
| sp O96014 ACTL6A  | sp O96014 | 2 | 12 | 12 | 12 | 45  | 47.46  | 2366400000 | 2403100000 | 2070600000 | 2550600000  | 2254500000  | 2674700000 |
| sp P00167 CYB5A   | sp P00167 | 1 | 5  | 5  | 5  | 49  | 15.33  | 306760000  | 440520000  | 383120000  | 372740000   | 384340000   | 380570000  |
| sp P00338 LDHA    | sp P00338 | 3 | 24 | 24 | 23 | 68  | 36.688 | 8.7011E+10 | 9.4285E+10 | 8.8105E+10 | 79974000000 | 80066000000 | 8.4824E+10 |
| sp P00367 GLUD1   | sp P00367 | 2 | 19 | 19 | 19 | 41  | 61.397 | 4101400000 | 3463700000 | 3735000000 | 4229000000  | 3945200000  | 4029600000 |
| sp P00374 DHFR    | sp P00374 | 2 | 7  | 7  | 7  | 48  | 21.452 | 1296900000 | 1380600000 | 1141100000 | 1062800000  | 1380300000  | 1029500000 |
| sp P00387 CYB5R3  | sp P00387 | 1 | 13 | 13 | 13 | 64  | 34.234 | 4511400000 | 4355900000 | 4624400000 | 5353600000  | 5326000000  | 4845400000 |
| sp P00390 GSR     | sp P00390 | 1 | 15 | 15 | 15 | 46  | 56.256 | 3151200000 | 3130200000 | 2760000000 | 3202700000  | 3679000000  | 3018800000 |
| sp P00395 MT-CO1  | sp P00395 | 1 | 1  | 1  | 1  | 6   | 57.041 | 0          | 0          | 0          | 0           | 22734000    | 0          |
| sp P00403 MT-CO2  | sp P00403 | 1 | 6  | 6  | 6  | 31  | 25.565 | 1516400000 | 1676100000 | 1432100000 | 1387900000  | 1237300000  | 1169200000 |
| sp P00441 SOD1    | sp P00441 | 1 | 6  | 6  | 6  | 60  | 15.936 | 8449700000 | 9093100000 | 9566800000 | 6682500000  | 6157200000  | 7979600000 |
| sp P00491 PNP     | sp P00491 | 1 | 16 | 16 | 16 | 74  | 32.118 | 4875800000 | 6149500000 | 5497700000 | 4189100000  | 4389700000  | 4346300000 |
| sp P00492 HPRT1   | sp P00492 | 2 | 12 | 12 | 12 | 73  | 24.579 | 4299800000 | 3497400000 | 4410100000 | 4482600000  | 3734200000  | 4070000000 |
| sp P00505 GOT2    | sp P00505 | 1 | 19 | 19 | 19 | 51  | 47.517 | 6937800000 | 7442400000 | 6770100000 | 8330400000  | 8854800000  | 8281500000 |
| sp P00533 EGFR    | sp P00533 | 3 | 18 | 18 | 18 | 26  | 134.28 | 981590000  | 1066500000 | 784180000  | 970120000   | 1360200000  | 1031400000 |
| sp P00558 PGK1    | sp P00558 | 2 | 27 | 27 | 27 | 63  | 44.614 | 7.5839E+10 | 7.3002E+10 | 7.1501E+10 | 67051000000 | 70987000000 | 6.7909E+10 |
| sp P00568 AK1     | sp P00568 | 2 | 10 | 10 | 10 | 61  | 21.635 | 2355500000 | 2019400000 | 3181200000 | 2203500000  | 2171100000  | 2679100000 |
| sp P00846 MT-ATP6 | sp P00846 | 1 | 1  | 1  | 1  | 4.4 | 24.817 | 0          | 0          | 0          | 0           | 0           | 315420000  |
| sp P00918 CA2     | sp P00918 | 1 | 1  | 1  | 1  | 3.5 | 29.246 | 0          | 0          | 0          | 0           | 33383000    | 0          |
| sp P00966 ASS1    | sp P00966 | 1 | 5  | 5  | 5  | 13  | 46.53  | 191280000  | 172850000  | 190990000  | 279370000   | 348960000   | 290630000  |
| sp P01033 TIMP1   | sp P01033 | 1 | 1  | 1  | 1  | 5.8 | 23.171 | 0          | 0          | 0          | 0           | 0           | 0          |
| sp P01034 CST3    | sp P01034 | 1 | 2  | 2  | 2  | 19  | 15.799 | 31908000   | 0          | 0          | 0           | 0           | 0          |
| sp P01111 NRAS    | sp P01111 | 3 | 7  | 7  | 7  | 58  | 21.229 | 378280000  | 672630000  | 772660000  | 629350000   | 529230000   | 644670000  |
| sp P01130 LDLR    | sp P01130 | 1 | 2  | 2  | 2  | 3.6 | 95.375 | 0          | 74756000   | 0          | 157640000   | 0           | 0          |

|           |          |           |    |    |    |    |     |        |            |            |            |             |             |            |
|-----------|----------|-----------|----|----|----|----|-----|--------|------------|------------|------------|-------------|-------------|------------|
| sp P01891 | HLA-A    | sp P01891 | 6  | 17 | 17 | 3  | 49  | 40.908 | 6083900000 | 4956200000 | 4696500000 | 5577700000  | 6126700000  | 5445600000 |
| sp P02462 | COL4A1   | sp P02462 | 2  | 2  | 2  | 2  | 1.7 | 160.61 | 201690000  | 137970000  | 106420000  | 170750000   | 202540000   | 131220000  |
| sp P02545 | LMNA     | sp P02545 | 2  | 46 | 46 | 44 | 70  | 74.139 | 6.6415E+10 | 6.2948E+10 | 6.0403E+10 | 64075000000 | 67751000000 | 7.1118E+10 |
| sp P02656 | APOC3    | sp P02656 | 1  | 1  | 1  | 1  | 16  | 10.852 | 0          | 0          | 233480000  | 0           | 0           | 0          |
| sp P02751 | FN1      | sp P02751 | 1  | 14 | 14 | 14 | 9.3 | 262.62 | 149700000  | 122640000  | 121420000  | 1028200000  | 616750000   | 1273600000 |
| sp P02786 | TFRC     | sp P02786 | 2  | 28 | 28 | 28 | 41  | 84.87  | 8666200000 | 8874300000 | 8654300000 | 8176600000  | 7942400000  | 9217400000 |
| sp P02792 | FTL      | sp P02792 | 1  | 3  | 3  | 3  | 23  | 20.019 | 196160000  | 154390000  | 0          | 176400000   | 0           | 0          |
| sp P02794 | FTH1     | sp P02794 | 1  | 11 | 11 | 11 | 72  | 21.225 | 4430700000 | 4531100000 | 4347000000 | 3819400000  | 4038600000  | 3352900000 |
| sp P03897 | MT-ND3   | sp P03897 | 1  | 1  | 1  | 1  | 13  | 13.186 | 0          | 0          | 0          | 0           | 0           | 79692000   |
| sp P03905 | MT-ND4   | sp P03905 | 1  | 1  | 1  | 1  | 2.2 | 51.58  | 0          | 0          | 0          | 0           | 0           | 21608000   |
| sp P03915 | MT-ND5   | sp P03915 | 1  | 2  | 2  | 2  | 6   | 67.026 | 97303000   | 85123000   | 123000000  | 0           | 0           | 98452000   |
| sp P03928 | MT-ATP8  | sp P03928 | 1  | 3  | 3  | 3  | 49  | 7.9916 | 472750000  | 462290000  | 413410000  | 470320000   | 993160000   | 494510000  |
| sp P04040 | CAT      | sp P04040 | 1  | 13 | 13 | 13 | 35  | 59.755 | 1557100000 | 1273900000 | 1318400000 | 1341800000  | 1239300000  | 1416800000 |
| sp P04062 | GBA      | sp P04062 | 1  | 7  | 7  | 7  | 17  | 59.716 | 311760000  | 394420000  | 409590000  | 458700000   | 453000000   | 388500000  |
| sp P04075 | ALDOA    | sp P04075 | 2  | 28 | 28 | 23 | 84  | 39.42  | 8.2045E+10 | 8.3422E+10 | 6.796E+10  | 74423000000 | 74216000000 | 7.2752E+10 |
| sp P04080 | CSTB     | sp P04080 | 1  | 5  | 5  | 5  | 78  | 11.139 | 4344900000 | 2866600000 | 3934700000 | 3780600000  | 5838700000  | 4680000000 |
| sp P04083 | ANXA1    | sp P04083 | 1  | 24 | 24 | 24 | 71  | 38.714 | 3.5307E+10 | 3.712E+10  | 3.2867E+10 | 36753000000 | 32976000000 | 3.6082E+10 |
| sp P04150 | NR3C1    | sp P04150 | 2  | 11 | 11 | 11 | 21  | 85.658 | 482600000  | 406240000  | 275760000  | 439000000   | 531480000   | 445350000  |
| sp P04156 | PRNP     | sp P04156 | 1  | 2  | 2  | 2  | 9.5 | 27.661 | 0          | 0          | 0          | 0           | 0           | 92096000   |
| sp P04179 | SOD2     | sp P04179 | 1  | 8  | 8  | 8  | 46  | 24.75  | 1777200000 | 1907600000 | 2086600000 | 2555200000  | 2102700000  | 2291500000 |
| sp P04181 | OAT      | sp P04181 | 1  | 10 | 10 | 10 | 38  | 48.534 | 883790000  | 806150000  | 1053900000 | 972850000   | 974120000   | 700420000  |
| sp P04183 | TK1      | sp P04183 | 1  | 4  | 4  | 4  | 20  | 25.468 | 346860000  | 380620000  | 325050000  | 427670000   | 543190000   | 464510000  |
| sp P04406 | GAPDH    | sp P04406 | 2  | 17 | 17 | 17 | 68  | 36.053 | 1.4562E+11 | 1.4331E+11 | 1.3625E+11 | 1.3327E+11  | 1.3604E+11  | 1.3816E+11 |
| sp P04632 | CAPNS1   | sp P04632 | 2  | 10 | 10 | 10 | 59  | 28.315 | 2034500000 | 2670200000 | 2230300000 | 2309900000  | 2151000000  | 2219700000 |
| sp P04792 | HSPB1    | sp P04792 | 1  | 17 | 17 | 17 | 85  | 22.782 | 3.9908E+10 | 3.7397E+10 | 3.7673E+10 | 37348000000 | 37821000000 | 3.6436E+10 |
| sp P04818 | TYMS     | sp P04818 | 1  | 6  | 6  | 6  | 27  | 35.716 | 712830000  | 788210000  | 745250000  | 397640000   | 390870000   | 404970000  |
| sp P04843 | RPN1     | sp P04843 | 1  | 31 | 31 | 31 | 60  | 68.569 | 8583200000 | 9181400000 | 9200200000 | 10345000000 | 9544400000  | 1.031E+10  |
| sp P04844 | RPN2     | sp P04844 | 1  | 20 | 20 | 20 | 45  | 69.283 | 6994300000 | 6746900000 | 7709200000 | 7110100000  | 7015000000  | 8168800000 |
| sp P04899 | GNAI2    | sp P04899 | 1  | 14 | 14 | 9  | 54  | 40.45  | 3435200000 | 3618900000 | 3420100000 | 3121300000  | 4014100000  | 3597400000 |
| sp Q99878 | HIST1H2A | sp Q99878 | 12 | 3  | 1  | 1  | 27  | 13.936 | 1.1255E+10 | 1.1729E+10 | 1.14E+10   | 10297000000 | 13292000000 | 8935500000 |
| sp P05023 | ATP1A1   | sp P05023 | 5  | 38 | 38 | 25 | 44  | 112.89 | 9798700000 | 8839600000 | 1.0414E+10 | 8827100000  | 9017400000  | 1.0418E+10 |
| sp P05026 | ATP1B1   | sp P05026 | 1  | 7  | 7  | 7  | 32  | 35.061 | 768660000  | 901530000  | 935280000  | 841810000   | 865270000   | 917390000  |
| sp P05067 | APP      | sp P05067 | 1  | 4  | 4  | 4  | 6.5 | 86.942 | 0          | 202210000  | 0          | 156070000   | 181760000   | 0          |
| sp P05091 | ALDH2    | sp P05091 | 1  | 14 | 13 | 13 | 41  | 56.381 | 830370000  | 917430000  | 838560000  | 940700000   | 992930000   | 1045300000 |
| sp P05114 | HMGN1    | sp P05114 | 1  | 4  | 4  | 4  | 34  | 10.659 | 641420000  | 459960000  | 606420000  | 521620000   | 518230000   | 502280000  |
| sp P05141 | SLC25A5  | sp P05141 | 2  | 15 | 6  | 6  | 43  | 32.852 | 7620300000 | 6472000000 | 6020900000 | 8422400000  | 8274100000  | 7595500000 |
| sp P05161 | ISG15    | sp P05161 | 1  | 10 | 10 | 10 | 64  | 17.887 | 6811100000 | 6967200000 | 5148400000 | 7061800000  | 9150900000  | 8526500000 |
| sp P05166 | PCCB     | sp P05166 | 1  | 1  | 1  | 1  | 3   | 58.215 | 0          | 0          | 0          | 0           | 0           | 29453000   |
| sp P05198 | EIF2S1   | sp P05198 | 1  | 21 | 21 | 21 | 67  | 36.112 | 6708600000 | 5762800000 | 6699700000 | 6020900000  | 6135600000  | 6381600000 |



|                    |           |   |    |    |    |     |        |            |            |            |             |             |            |
|--------------------|-----------|---|----|----|----|-----|--------|------------|------------|------------|-------------|-------------|------------|
| sp P05204 HMG2     | sp P05204 | 2 | 1  | 1  | 1  | 10  | 9.3926 | 0          | 0          | 0          | 0           | 0           | 4422800    |
| sp P05362 ICAM1    | sp P05362 | 1 | 4  | 4  | 4  | 9.2 | 57.825 | 0          | 0          | 0          | 167550000   | 0           | 0          |
| sp P05386 RPLP1    | sp P05386 | 1 | 4  | 3  | 3  | 90  | 11.514 | 3022900000 | 2767300000 | 2875000000 | 2406000000  | 2083000000  | 2292500000 |
| sp P05387 RPLP2    | sp P05387 | 1 | 9  | 9  | 8  | 92  | 11.665 | 1.823E+10  | 2.3252E+10 | 2.056E+10  | 24302000000 | 30008000000 | 2.0953E+10 |
| sp P05388 RPLP0    | sp P05388 | 2 | 13 | 13 | 13 | 58  | 34.273 | 2.3603E+10 | 2.0347E+10 | 1.8852E+10 | 22612000000 | 24363000000 | 1.8606E+10 |
| sp P05423 POLR3D   | sp P05423 | 1 | 1  | 1  | 1  | 2.3 | 44.395 | 0          | 0          | 0          | 0           | 16530000    | 0          |
| sp P05455 SSB      | sp P05455 | 1 | 24 | 24 | 24 | 57  | 46.836 | 4474800000 | 5095300000 | 3870700000 | 4700500000  | 4056100000  | 4738300000 |
| sp P05556 ITGB1    | sp P05556 | 1 | 23 | 23 | 23 | 33  | 88.414 | 9028300000 | 1.0868E+10 | 9825100000 | 10953000000 | 11857000000 | 1.0751E+10 |
| sp P05783 KRT18    | sp P05783 | 5 | 29 | 28 | 19 | 69  | 48.057 | 4.4078E+10 | 4.8988E+10 | 4.5817E+10 | 49210000000 | 52913000000 | 4.4978E+10 |
| sp P05976 MYL1     | sp P05976 | 2 | 2  | 2  | 2  | 8.2 | 21.145 | 0          | 222750000  | 0          | 0           | 599420000   | 841810000  |
| sp P06132 UROD     | sp P06132 | 1 | 9  | 9  | 9  | 38  | 40.786 | 1321100000 | 986730000  | 1083100000 | 1025600000  | 1215200000  | 964730000  |
| sp P06280 GLA      | sp P06280 | 1 | 3  | 3  | 3  | 11  | 48.766 | 0          | 0          | 0          | 0           | 121730000   | 0          |
| sp P06396 GSN      | sp P06396 | 1 | 14 | 14 | 5  | 27  | 85.696 | 1410500000 | 1694800000 | 1765500000 | 1789700000  | 1761700000  | 1772200000 |
| sp P06454 PTMA     | sp P06454 | 1 | 7  | 7  | 7  | 36  | 12.203 | 9956400000 | 9599700000 | 1.0074E+10 | 6798100000  | 8953600000  | 7731500000 |
| sp P06493 CDK1     | sp P06493 | 1 | 10 | 10 | 9  | 39  | 34.095 | 3808500000 | 3307500000 | 3502700000 | 3240700000  | 3773600000  | 3972600000 |
| sp P06576 ATP5F1B  | sp P06576 | 1 | 25 | 25 | 25 | 71  | 56.559 | 3.2886E+10 | 2.9643E+10 | 3.1949E+10 | 41715000000 | 35224000000 | 3.8526E+10 |
| sp P06703 S100A6   | sp P06703 | 1 | 3  | 3  | 3  | 24  | 10.18  | 2.8156E+10 | 6023500000 | 3.4875E+10 | 23889000000 | 28768000000 | 4.0191E+10 |
| sp P06730 EIF4E    | sp P06730 | 1 | 5  | 5  | 5  | 36  | 25.097 | 1465600000 | 1389200000 | 916530000  | 1017800000  | 1067500000  | 1239200000 |
| sp P06733 ENO1     | sp P06733 | 1 | 24 | 24 | 21 | 71  | 47.168 | 1.3938E+11 | 1.5757E+11 | 1.5238E+11 | 1.2747E+11  | 1.312E+11   | 1.2922E+11 |
| sp P06737 PYGL     | sp P06737 | 1 | 27 | 27 | 22 | 38  | 97.147 | 2561600000 | 2313500000 | 2316800000 | 2290700000  | 1986900000  | 2055600000 |
| sp P06744 GPI      | sp P06744 | 2 | 22 | 22 | 17 | 51  | 63.146 | 2.1387E+10 | 2.1577E+10 | 2.3517E+10 | 19515000000 | 22063000000 | 2.1673E+10 |
| sp P06748 NPM1     | sp P06748 | 1 | 11 | 11 | 11 | 44  | 32.575 | 4.0671E+10 | 5.1833E+10 | 5.2599E+10 | 47591000000 | 49605000000 | 5.5484E+10 |
| sp P06753 TPM3     | sp P06753 | 1 | 15 | 5  | 5  | 40  | 32.95  | 5047300000 | 7393100000 | 5664300000 | 5762400000  | 7396600000  | 6406900000 |
| sp P06756 ITGAV    | sp P06756 | 1 | 20 | 20 | 20 | 24  | 116.04 | 1578900000 | 1700300000 | 1530500000 | 1183600000  | 1238000000  | 1261100000 |
| sp P06858 LPL      | sp P06858 | 1 | 3  | 3  | 3  | 10  | 53.162 | 145620000  | 157170000  | 164630000  | 148260000   | 159600000   | 104340000  |
| sp P06865 HEXA     | sp P06865 | 1 | 4  | 4  | 4  | 8.9 | 60.702 | 0          | 221540000  | 174380000  | 210490000   | 0           | 211980000  |
| sp Q16776 HIST2H2E | sp Q16776 | 6 | 6  | 6  | 0  | 41  | 13.92  | 8.6605E+10 | 1.0164E+11 | 1.0324E+11 | 1.0924E+11  | 1.0507E+11  | 1.0175E+11 |
| sp P07093 SERPINE  | sp P07093 | 1 | 1  | 1  | 1  | 4.5 | 44.002 | 0          | 13182000   | 0          | 52246000    | 23929000    | 17919000   |
| sp P07099 EPHX1    | sp P07099 | 1 | 17 | 17 | 17 | 54  | 52.948 | 4347700000 | 5006900000 | 4348900000 | 4783900000  | 4609200000  | 5386600000 |
| sp P07108 DBI      | sp P07108 | 1 | 6  | 6  | 6  | 61  | 10.044 | 3840500000 | 4120800000 | 2999900000 | 3781600000  | 3778200000  | 3015100000 |
| sp P07195 LDHB     | sp P07195 | 1 | 20 | 19 | 19 | 56  | 36.638 | 5.6804E+10 | 6.4408E+10 | 6.1062E+10 | 60772000000 | 57477000000 | 5.008E+10  |
| sp P07203 GPX1     | sp P07203 | 1 | 10 | 10 | 10 | 59  | 22.088 | 727480000  | 749340000  | 932960000  | 1127200000  | 1069900000  | 1009000000 |
| sp P07237 P4HB     | sp P07237 | 1 | 32 | 32 | 32 | 67  | 57.116 | 2.822E+10  | 2.637E+10  | 2.4862E+10 | 30628000000 | 29025000000 | 2.9233E+10 |
| sp P07305 H1FO     | sp P07305 | 1 | 3  | 3  | 3  | 16  | 20.863 | 118080000  | 95233000   | 147280000  | 286610000   | 291250000   | 0          |
| sp P07317 ACYP1    | sp P07317 | 1 | 2  | 2  | 2  | 23  | 11.261 | 170940000  | 177000000  | 132930000  | 107840000   | 117290000   | 0          |
| sp P07339 CTSD     | sp P07339 | 1 | 14 | 14 | 14 | 45  | 44.552 | 1796200000 | 2378100000 | 2265100000 | 2419200000  | 2673200000  | 2264200000 |
| sp P07355 ANXA2    | sp P07355 | 2 | 28 | 28 | 28 | 68  | 38.604 | 1.138E+11  | 1.2734E+11 | 1.1257E+11 | 1.2608E+11  | 1.2891E+11  | 1.2547E+11 |
| sp P07384 CAPN1    | sp P07384 | 1 | 20 | 20 | 20 | 34  | 81.889 | 1047900000 | 1463200000 | 1315100000 | 1202900000  | 1140100000  | 987920000  |
| sp P07437 TUBB     | sp P07437 | 2 | 22 | 5  | 4  | 70  | 49.67  | 2.8015E+10 | 3.3499E+10 | 2.1109E+10 | 25943000000 | 26098000000 | 2.4492E+10 |

|                   |           |   |    |    |    |     |        |            |            |            |             |             |            |
|-------------------|-----------|---|----|----|----|-----|--------|------------|------------|------------|-------------|-------------|------------|
| sp P07602 PSAP    | sp P07602 | 1 | 13 | 13 | 13 | 28  | 58.112 | 3209700000 | 2769700000 | 3091000000 | 3855000000  | 3574200000  | 3246300000 |
| sp P07686 HEXB    | sp P07686 | 1 | 7  | 7  | 7  | 19  | 63.111 | 599420000  | 714790000  | 655740000  | 687270000   | 637360000   | 698770000  |
| sp P07711 CTSL    | sp P07711 | 1 | 2  | 2  | 2  | 7.8 | 37.564 | 0          | 0          | 0          | 0           | 0           | 215900000  |
| sp P07737 PFN1    | sp P07737 | 2 | 11 | 11 | 11 | 90  | 15.054 | 5.5468E+10 | 6.112E+10  | 4.37E+10   | 50837000000 | 56515000000 | 5.7448E+10 |
| sp P07741 APRT    | sp P07741 | 1 | 9  | 9  | 9  | 55  | 19.608 | 1537800000 | 1760200000 | 1450000000 | 1792200000  | 1834100000  | 1505500000 |
| sp P07814 EPRS    | sp P07814 | 1 | 56 | 56 | 55 | 50  | 170.59 | 1.7579E+10 | 1.8016E+10 | 1.6648E+10 | 18660000000 | 16909000000 | 1.9043E+10 |
| sp P07858 CTSB    | sp P07858 | 1 | 2  | 2  | 2  | 6.2 | 37.821 | 0          | 0          | 0          | 159410000   | 0           | 0          |
| sp P07900 HSP90AA | sp P07900 | 4 | 44 | 28 | 28 | 59  | 84.659 | 4.9572E+10 | 5.0568E+10 | 5.1136E+10 | 51274000000 | 44352000000 | 4.7651E+10 |
| sp P07910 HNRNPC  | sp P07910 | 5 | 13 | 13 | 13 | 41  | 33.67  | 1.5786E+10 | 1.4492E+10 | 1.7599E+10 | 16187000000 | 18020000000 | 1.9596E+10 |
| sp P07919 UQCRH   | sp P07919 | 2 | 5  | 5  | 5  | 67  | 10.739 | 1964400000 | 2108900000 | 1939100000 | 1975900000  | 2040500000  | 2767900000 |
| sp P07942 LAMB1   | sp P07942 | 1 | 9  | 9  | 9  | 8.3 | 198.04 | 176280000  | 226280000  | 227470000  | 260680000   | 260950000   | 160990000  |
| sp P07954 FH      | sp P07954 | 1 | 17 | 17 | 17 | 50  | 54.636 | 3680500000 | 4347700000 | 4046000000 | 4214400000  | 4072500000  | 4127200000 |
| sp P08047 SP1     | sp P08047 | 1 | 2  | 2  | 2  | 5.5 | 80.692 | 0          | 0          | 0          | 0           | 0           | 75212000   |
| sp P08133 ANXA6   | sp P08133 | 1 | 31 | 31 | 31 | 56  | 75.872 | 4770000000 | 4834100000 | 5057600000 | 4588300000  | 4842000000  | 4846400000 |
| sp P08134 RHOC    | sp P08134 | 1 | 7  | 2  | 2  | 45  | 22.006 | 346240000  | 327340000  | 310300000  | 196960000   | 392050000   | 280090000  |
| sp P08174 CD55    | sp P08174 | 1 | 15 | 15 | 15 | 42  | 41.4   | 3495100000 | 3668500000 | 3289400000 | 5195600000  | 5717700000  | 5508100000 |
| sp P08195 SLC3A2  | sp P08195 | 1 | 25 | 25 | 25 | 42  | 67.993 | 2.829E+10  | 2.5481E+10 | 2.8328E+10 | 32979000000 | 39107000000 | 3.6048E+10 |
| sp P08237 PFKM    | sp P08237 | 1 | 20 | 18 | 17 | 35  | 85.182 | 2663900000 | 2453300000 | 2601700000 | 2195800000  | 2301500000  | 2383100000 |
| sp P08238 HSP90AB | sp P08238 | 2 | 51 | 51 | 27 | 64  | 83.263 | 1.511E+11  | 1.6378E+11 | 1.5149E+11 | 1.4991E+11  | 1.551E+11   | 1.7473E+11 |
| sp P08240 SRPRA   | sp P08240 | 1 | 10 | 10 | 10 | 20  | 69.81  | 406520000  | 556930000  | 287320000  | 395120000   | 522250000   | 0          |
| sp P08243 ASNS    | sp P08243 | 1 | 16 | 16 | 16 | 36  | 64.369 | 1169100000 | 1164500000 | 1429400000 | 2218800000  | 1827200000  | 1645900000 |
| sp P08397 HMBS    | sp P08397 | 1 | 5  | 5  | 5  | 18  | 39.33  | 0          | 121760000  | 0          | 0           | 0           | 0          |
| sp P08559 PDHA1   | sp P08559 | 2 | 17 | 17 | 17 | 57  | 43.295 | 3230300000 | 3428100000 | 3247500000 | 2902300000  | 3034600000  | 3879300000 |
| sp P08572 COL4A2  | sp P08572 | 1 | 5  | 5  | 5  | 3.9 | 167.55 | 0          | 0          | 0          | 201510000   | 220110000   | 176720000  |
| sp P08574 CYC1    | sp P08574 | 1 | 7  | 7  | 7  | 35  | 35.422 | 1994400000 | 1899900000 | 2232000000 | 1849400000  | 1288300000  | 1931200000 |
| sp P08579 SNRPB2  | sp P08579 | 1 | 7  | 5  | 5  | 35  | 25.486 | 1083700000 | 1092400000 | 1012400000 | 1003800000  | 965030000   | 1083400000 |
| sp P08581 MET     | sp P08581 | 1 | 7  | 7  | 7  | 8.7 | 155.54 | 155870000  | 167860000  | 196730000  | 187280000   | 175830000   | 188970000  |
| sp P08621 SNRNP70 | sp P08621 | 1 | 15 | 15 | 15 | 29  | 51.556 | 3704200000 | 3913500000 | 3559000000 | 2947500000  | 3630000000  | 4646600000 |
| sp P08648 ITGA5   | sp P08648 | 1 | 16 | 16 | 16 | 22  | 114.54 | 1481000000 | 1626800000 | 1540400000 | 1707400000  | 1564100000  | 1573700000 |
| sp P08651 NFIC    | sp P08651 | 1 | 2  | 2  | 2  | 8.9 | 55.674 | 168930000  | 154410000  | 164450000  | 135930000   | 154200000   | 0          |
| sp P08670 VIM     | sp P08670 | 8 | 42 | 42 | 39 | 83  | 53.651 | 2.1934E+11 | 2.2951E+11 | 1.9611E+11 | 2.1612E+11  | 2.5771E+11  | 2.2382E+11 |
| sp P08708 RPS17   | sp P08708 | 1 | 8  | 8  | 8  | 57  | 15.55  | 8691500000 | 6592100000 | 6769200000 | 6948400000  | 8443500000  | 6948000000 |
| sp P08754 GNAI3   | sp P08754 | 1 | 12 | 7  | 7  | 48  | 40.532 | 1268300000 | 794420000  | 1084600000 | 948750000   | 803370000   | 1265100000 |
| sp P08758 ANXA5   | sp P08758 | 1 | 20 | 20 | 20 | 70  | 35.936 | 2.0088E+10 | 1.9815E+10 | 2.0061E+10 | 20784000000 | 21438000000 | 1.6621E+10 |
| sp P08865 RPSA    | sp P08865 | 1 | 15 | 15 | 15 | 59  | 32.854 | 1.9165E+10 | 2.3768E+10 | 2.1059E+10 | 21010000000 | 21912000000 | 1.907E+10  |
| sp P08962 CD63    | sp P08962 | 1 | 2  | 2  | 2  | 7.6 | 25.636 | 1896900000 | 1504100000 | 1360000000 | 1455100000  | 1688400000  | 1505200000 |
| sp P09001 MRPL3   | sp P09001 | 1 | 6  | 6  | 6  | 28  | 38.632 | 173680000  | 159600000  | 206770000  | 173160000   | 232730000   | 0          |
| sp P09012 SNRPA   | sp P09012 | 1 | 8  | 8  | 6  | 30  | 31.279 | 1812300000 | 990880000  | 1603200000 | 1216000000  | 1713600000  | 1378000000 |
| sp P09038 FGF2    | sp P09038 | 1 | 5  | 5  | 5  | 16  | 30.77  | 334800000  | 244930000  | 268300000  | 380310000   | 317770000   | 417230000  |

|                   |           |   |    |    |    |     |        |            |            |            |             |             |            |
|-------------------|-----------|---|----|----|----|-----|--------|------------|------------|------------|-------------|-------------|------------|
| sp P09104 ENO2    | sp P09104 | 1 | 8  | 5  | 5  | 33  | 47.268 | 666350000  | 564250000  | 658280000  | 564400000   | 517930000   | 479700000  |
| sp P09110 ACAA1   | sp P09110 | 1 | 10 | 10 | 10 | 44  | 44.292 | 803980000  | 662910000  | 741250000  | 916770000   | 841810000   | 1037000000 |
| sp P09132 SRP19   | sp P09132 | 1 | 4  | 4  | 4  | 46  | 16.156 | 367690000  | 333840000  | 305540000  | 458020000   | 147740000   | 388500000  |
| sp P09211 GSTP1   | sp P09211 | 1 | 12 | 12 | 12 | 70  | 23.356 | 2.1247E+10 | 1.9626E+10 | 1.8902E+10 | 21784000000 | 20444000000 | 1.8711E+10 |
| sp P09234 SNRPC   | sp P09234 | 1 | 3  | 3  | 3  | 25  | 17.394 | 0          | 1058700000 | 1063800000 | 0           | 0           | 1248800000 |
| sp P09382 LGALS1  | sp P09382 | 1 | 10 | 10 | 10 | 91  | 14.716 | 2.3237E+10 | 2.857E+10  | 2.2801E+10 | 25052000000 | 25270000000 | 2.3983E+10 |
| sp P09417 QDPR    | sp P09417 | 1 | 8  | 8  | 8  | 46  | 25.789 | 430780000  | 374220000  | 454920000  | 407950000   | 434110000   | 330380000  |
| sp P09429 HMGB1   | sp P09429 | 2 | 12 | 12 | 9  | 47  | 24.893 | 1.7674E+10 | 1.4571E+10 | 1.684E+10  | 15295000000 | 16123000000 | 1.6439E+10 |
| sp P09488 GSTM1   | sp P09488 | 1 | 9  | 9  | 1  | 53  | 25.712 | 923150000  | 1044700000 | 1210500000 | 899110000   | 761270000   | 982860000  |
| sp P09493 TPM1    | sp P09493 | 1 | 16 | 12 | 5  | 46  | 32.708 | 6920600000 | 6461800000 | 6428400000 | 5248500000  | 6018000000  | 4990500000 |
| sp P09496 CLTA    | sp P09496 | 1 | 6  | 6  | 6  | 19  | 27.076 | 3100400000 | 2489900000 | 2010500000 | 2755400000  | 2994100000  | 2961800000 |
| sp P09497 CLTB    | sp P09497 | 1 | 6  | 6  | 6  | 22  | 25.19  | 356480000  | 292420000  | 342440000  | 0           | 442320000   | 374000000  |
| sp P09525 ANXA4   | sp P09525 | 1 | 12 | 12 | 12 | 46  | 35.882 | 1410600000 | 1046800000 | 1263000000 | 979900000   | 1154500000  | 1164500000 |
| sp P09543 CNP     | sp P09543 | 1 | 11 | 11 | 11 | 31  | 47.578 | 1079700000 | 1187400000 | 1137800000 | 1018800000  | 1300900000  | 1118900000 |
| sp P09601 HMOX1   | sp P09601 | 1 | 8  | 8  | 8  | 42  | 32.818 | 655640000  | 663010000  | 677190000  | 570450000   | 601200000   | 569340000  |
| sp P09622 DLD     | sp P09622 | 1 | 10 | 10 | 10 | 25  | 54.177 | 2553900000 | 2123400000 | 3392300000 | 2219400000  | 1867400000  | 2430200000 |
| sp P09651 HNRNPA  | sp P09651 | 2 | 16 | 16 | 16 | 48  | 38.746 | 2.5174E+10 | 2.23E+10   | 2.4563E+10 | 22385000000 | 21266000000 | 2.287E+10  |
| sp P09661 SNRPA1  | sp P09661 | 1 | 8  | 8  | 8  | 43  | 28.415 | 1227500000 | 1637400000 | 1155900000 | 1061200000  | 991700000   | 986620000  |
| sp P09669 COX6C   | sp P09669 | 1 | 2  | 2  | 2  | 25  | 8.7813 | 457930000  | 358980000  | 433830000  | 295120000   | 401810000   | 320990000  |
| sp P09758 TACSTD2 | sp P09758 | 1 | 1  | 1  | 1  | 5   | 35.709 | 0          | 0          | 0          | 0           | 0           | 32365000   |
| sp P09874 PARP1   | sp P09874 | 1 | 42 | 42 | 42 | 49  | 113.08 | 8403400000 | 1.0045E+10 | 8965600000 | 9072200000  | 9068700000  | 9606000000 |
| sp P09884 POLA1   | sp P09884 | 1 | 12 | 12 | 12 | 12  | 165.91 | 424590000  | 491940000  | 484280000  | 408230000   | 357440000   | 403510000  |
| sp P09913 IFIT2   | sp P09913 | 1 | 1  | 1  | 1  | 2.3 | 54.632 | 0          | 0          | 0          | 0           | 0           | 48348000   |
| sp P09914 IFIT1   | sp P09914 | 2 | 5  | 5  | 5  | 16  | 55.36  | 123170000  | 138030000  | 134450000  | 112990000   | 178480000   | 162600000  |
| sp P09960 LTA4H   | sp P09960 | 1 | 17 | 17 | 17 | 39  | 69.284 | 3677100000 | 3406600000 | 3466000000 | 2757400000  | 3120200000  | 2832300000 |
| sp P09972 ALDOC   | sp P09972 | 1 | 7  | 2  | 2  | 24  | 39.455 | 5545600000 | 5893100000 | 4663100000 | 6653600000  | 4625900000  | 4854800000 |
| sp Q71UI9 H2AFV   | sp Q71UI9 | 2 | 4  | 4  | 2  | 31  | 13.509 | 4.408E+10  | 3.8475E+10 | 4.5845E+10 | 44031000000 | 42718000000 | 4.3037E+10 |
| sp P0CG3 POTEJ    | sp P0CG3  | 1 | 7  | 1  | 1  | 9.6 | 117.39 | 0          | 0          | 0          | 0           | 0           | 315650000  |
| sp P0DMN SULT1A4  | sp P0DMN  | 3 | 2  | 2  | 2  | 11  | 34.196 | 74729000   | 54853000   | 86782000   | 48017000    | 78297000    | 65782000   |
| sp P0DMN HSPA1B   | sp P0DMN  | 2 | 31 | 29 | 16 | 60  | 70.051 | 4.9914E+10 | 6.1458E+10 | 5.2616E+10 | 60482000000 | 62009000000 | 6.2277E+10 |
| sp Q0108 U2AF1    | sp Q0108  | 3 | 7  | 7  | 7  | 29  | 27.872 | 2327500000 | 2244800000 | 2193400000 | 2828300000  | 2492900000  | 2341000000 |
| sp P35520 CBS     | sp P35520 | 2 | 11 | 11 | 11 | 33  | 60.586 | 693790000  | 949860000  | 871000000  | 1053800000  | 819750000   | 933080000  |
| sp P0DP2 CALM3    | sp P0DP2  | 5 | 11 | 11 | 11 | 60  | 16.837 | 1.4585E+10 | 1.6098E+10 | 1.3786E+10 | 14301000000 | 16601000000 | 1.4165E+10 |
| sp P0DP9 CSB-PGB  | sp P0DP9  | 2 | 1  | 1  | 1  | 1.2 | 119.49 | 0          | 0          | 0          | 0           | 47589000    | 0          |
| sp P0DPB POLR1D   | sp P0DPB  | 1 | 1  | 1  | 1  | 14  | 15.237 | 0          | 0          | 0          | 0           | 185390000   | 0          |
| sp P10109 FDX1    | sp P10109 | 1 | 1  | 1  | 1  | 11  | 19.393 | 14682000   | 23052000   | 25523000   | 15230000    | 22619000    | 31846000   |
| sp P10155 TROVE2  | sp P10155 | 1 | 13 | 13 | 13 | 28  | 60.67  | 1016000000 | 877830000  | 1097400000 | 1079900000  | 1085600000  | 815550000  |
| sp P10301 RRAS    | sp P10301 | 1 | 3  | 2  | 2  | 19  | 23.48  | 0          | 0          | 0          | 0           | 0           | 49844000   |
| sp P10316 HLA-A   | sp P10316 | 2 | 16 | 2  | 0  | 46  | 40.976 | 0          | 0          | 0          | 0           | 270900000   | 239080000  |

|                    |           |   |    |    |    |     |        |            |            |            |             |             |            |
|--------------------|-----------|---|----|----|----|-----|--------|------------|------------|------------|-------------|-------------|------------|
| sp P10321 HLA-C    | sp P10321 | 1 | 9  | 1  | 1  | 31  | 40.648 | 358100000  | 0          | 434320000  | 562890000   | 0           | 576650000  |
| sp P10398 ARAF     | sp P10398 | 2 | 4  | 4  | 3  | 7.4 | 67.585 | 196680000  | 167570000  | 197180000  | 206380000   | 224610000   | 220430000  |
| sp P10412 HIST1H1E | sp P10412 | 1 | 7  | 1  | 1  | 23  | 21.865 | 0          | 0          | 0          | 0           | 0           | 271300000  |
| sp P10515 DLAT     | sp P10515 | 1 | 10 | 10 | 10 | 21  | 68.996 | 738000000  | 953120000  | 751510000  | 844360000   | 1036100000  | 846820000  |
| sp P10599 TXN      | sp P10599 | 1 | 7  | 7  | 7  | 74  | 11.737 | 1.9567E+10 | 1.8328E+10 | 2.1981E+10 | 15061000000 | 16732000000 | 2.1493E+10 |
| sp P10606 COX5B    | sp P10606 | 1 | 5  | 5  | 5  | 40  | 13.696 | 1081800000 | 878100000  | 973980000  | 1078900000  | 1444400000  | 1152300000 |
| sp P10619 CTSA     | sp P10619 | 1 | 3  | 3  | 3  | 7.7 | 54.465 | 422080000  | 482930000  | 0          | 433360000   | 0           | 338690000  |
| sp P10620 MGST1    | sp P10620 | 1 | 4  | 4  | 4  | 27  | 17.598 | 2936100000 | 2641200000 | 2594800000 | 3364200000  | 2681500000  | 3302800000 |
| sp P10644 PRKAR1A  | sp P10644 | 1 | 8  | 8  | 7  | 21  | 42.981 | 623280000  | 531400000  | 811940000  | 722110000   | 690810000   | 554730000  |
| sp P10646 TFPI     | sp P10646 | 1 | 1  | 1  | 1  | 6.9 | 35.015 | 0          | 0          | 0          | 0           | 0           | 51984000   |
| sp P10768 ESD      | sp P10768 | 1 | 11 | 11 | 11 | 53  | 31.462 | 2066500000 | 2152000000 | 1885400000 | 1670400000  | 1783500000  | 1551300000 |
| sp P10809 HSPD1    | sp P10809 | 1 | 45 | 45 | 45 | 80  | 61.054 | 8.7005E+10 | 9.5645E+10 | 9.0117E+10 | 1.0383E+11  | 97518000000 | 1.0364E+11 |
| sp P10909 CLU      | sp P10909 | 1 | 9  | 9  | 9  | 26  | 52.494 | 1544000000 | 1257700000 | 1465200000 | 1415000000  | 1930700000  | 1002600000 |
| sp P11021 HSPA5    | sp P11021 | 1 | 32 | 31 | 31 | 49  | 72.332 | 5.4704E+10 | 6.0383E+10 | 5.1164E+10 | 79702000000 | 76743000000 | 7.6505E+10 |
| sp P11047 LAMC1    | sp P11047 | 1 | 16 | 16 | 16 | 16  | 177.6  | 482940000  | 534900000  | 508220000  | 495670000   | 481500000   | 528730000  |
| sp P11055 MYH3     | sp P11055 | 1 | 2  | 1  | 1  | 1.2 | 223.9  | 0          | 0          | 0          | 0           | 0           | 70752000   |
| sp P11117 ACP2     | sp P11117 | 1 | 6  | 6  | 6  | 17  | 48.344 | 155100000  | 114650000  | 190420000  | 177260000   | 143340000   | 167500000  |
| sp P11137 MAP2     | sp P11137 | 1 | 1  | 1  | 1  | 0.5 | 199.52 | 0          | 0          | 0          | 0           | 34879000    | 0          |
| sp P11142 HSPA8    | sp P11142 | 2 | 33 | 32 | 28 | 58  | 70.897 | 1.1675E+11 | 1.1398E+11 | 1.1736E+11 | 1.1297E+11  | 1.2562E+11  | 1.3109E+11 |
| sp P11166 SLC2A1   | sp P11166 | 1 | 6  | 6  | 6  | 12  | 54.083 | 1335800000 | 1503000000 | 1252700000 | 1146300000  | 1220000000  | 1162100000 |
| sp P11171 EPB41    | sp P11171 | 1 | 3  | 2  | 2  | 5.3 | 97.016 | 87707000   | 0          | 0          | 0           | 0           | 0          |
| sp P11172 UMPS     | sp P11172 | 1 | 13 | 13 | 13 | 34  | 52.221 | 1307300000 | 991910000  | 1739300000 | 1512000000  | 1389000000  | 1486000000 |
| sp P11177 PDHB     | sp P11177 | 1 | 11 | 11 | 11 | 44  | 39.233 | 3512600000 | 4064000000 | 2864800000 | 3788100000  | 4287400000  | 4304500000 |
| sp P11182 DBT      | sp P11182 | 1 | 2  | 2  | 2  | 4.8 | 53.486 | 0          | 0          | 0          | 0           | 0           | 70616000   |
| sp P11216 PYGB     | sp P11216 | 1 | 17 | 13 | 11 | 25  | 96.695 | 509050000  | 434890000  | 410910000  | 565530000   | 658220000   | 318830000  |
| sp P11233 RALA     | sp P11233 | 1 | 5  | 5  | 4  | 26  | 23.567 | 1089100000 | 1198700000 | 1153800000 | 1061100000  | 1106800000  | 1037500000 |
| sp P11234 RALB     | sp P11234 | 1 | 2  | 1  | 1  | 11  | 23.408 | 0          | 0          | 0          | 22096000    | 0           | 0          |
| sp P11274 BCR      | sp P11274 | 1 | 3  | 3  | 3  | 3.9 | 142.82 | 0          | 50101000   | 0          | 0           | 71102000    | 0          |
| sp P11279 LAMP1    | sp P11279 | 1 | 4  | 4  | 4  | 9.8 | 44.882 | 1753100000 | 840660000  | 1099100000 | 1260200000  | 1831600000  | 1875700000 |
| sp P11310 ACADM    | sp P11310 | 1 | 9  | 9  | 9  | 31  | 46.588 | 788780000  | 806770000  | 881380000  | 896970000   | 1099700000  | 979600000  |
| sp P11387 TOP1     | sp P11387 | 2 | 23 | 23 | 23 | 31  | 90.725 | 3216300000 | 2615000000 | 2607800000 | 3011900000  | 3159000000  | 3533700000 |
| sp P11388 TOP2A    | sp P11388 | 1 | 41 | 41 | 31 | 32  | 174.38 | 4516400000 | 4149800000 | 4323800000 | 4119400000  | 3720800000  | 4238900000 |
| sp P11413 G6PD     | sp P11413 | 1 | 32 | 32 | 32 | 62  | 59.256 | 1.7767E+10 | 1.7457E+10 | 1.7086E+10 | 17024000000 | 15734000000 | 1.6423E+10 |
| sp P11441 UBL4A    | sp P11441 | 1 | 5  | 5  | 5  | 36  | 17.776 | 154010000  | 168730000  | 0          | 165850000   | 176560000   | 158190000  |
| sp P11498 PC       | sp P11498 | 1 | 23 | 23 | 23 | 28  | 129.63 | 1846200000 | 1526600000 | 1920800000 | 1730500000  | 1553500000  | 1715700000 |
| sp P11586 MTHFD1   | sp P11586 | 1 | 37 | 37 | 36 | 50  | 101.56 | 1.1119E+10 | 9883100000 | 1.1038E+10 | 10970000000 | 10518000000 | 1.1773E+10 |
| sp P11717 IGF2R    | sp P11717 | 1 | 38 | 38 | 38 | 23  | 274.37 | 2503700000 | 2460000000 | 2432500000 | 2727600000  | 2702600000  | 2533600000 |
| sp P11766 ADH5     | sp P11766 | 1 | 14 | 14 | 14 | 50  | 39.724 | 3918300000 | 4635700000 | 4060500000 | 3944000000  | 3795200000  | 3849200000 |
| sp P11802 CDK4     | sp P11802 | 1 | 7  | 7  | 7  | 31  | 33.729 | 308990000  | 241120000  | 329470000  | 282810000   | 253950000   | 236360000  |

|                   |           |   |    |    |    |     |        |            |            |            |             |             |            |
|-------------------|-----------|---|----|----|----|-----|--------|------------|------------|------------|-------------|-------------|------------|
| sp P11908 PRPS2   | sp P11908 | 1 | 13 | 5  | 4  | 49  | 34.769 | 432720000  | 254750000  | 245920000  | 394870000   | 347940000   | 255170000  |
| sp P11940 PABPC1  | sp P11940 | 4 | 28 | 28 | 20 | 56  | 70.67  | 1.4221E+10 | 1.4897E+10 | 1.3601E+10 | 13103000000 | 13508000000 | 1.6339E+10 |
| sp P12004 PCNA    | sp P12004 | 1 | 11 | 11 | 11 | 54  | 28.768 | 5561700000 | 5694200000 | 5237500000 | 5653200000  | 6608500000  | 6032200000 |
| sp P12081 HARS    | sp P12081 | 1 | 21 | 21 | 16 | 49  | 57.41  | 3616100000 | 3329500000 | 3715000000 | 3304200000  | 3506900000  | 3099800000 |
| sp P12235 SLC25A4 | sp P12235 | 1 | 11 | 1  | 1  | 39  | 33.064 | 0          | 0          | 0          | 0           | 0           | 42218000   |
| sp P12236 SLC25A6 | sp P12236 | 1 | 16 | 16 | 3  | 52  | 32.866 | 1.3823E+10 | 1.8036E+10 | 1.7134E+10 | 19739000000 | 17131000000 | 2.117E+10  |
| sp P12268 IMPDH2  | sp P12268 | 1 | 24 | 24 | 23 | 62  | 55.804 | 8516100000 | 9147100000 | 8606200000 | 9318000000  | 10381000000 | 1.0354E+10 |
| sp P12270 TPR     | sp P12270 | 1 | 63 | 63 | 63 | 33  | 267.29 | 5775100000 | 5337200000 | 5853700000 | 5416400000  | 5530700000  | 6309000000 |
| sp P12277 CKB     | sp P12277 | 2 | 18 | 18 | 18 | 71  | 42.644 | 7149900000 | 9396500000 | 7153600000 | 7043500000  | 6842600000  | 6456700000 |
| sp P12429 ANXA3   | sp P12429 | 1 | 18 | 18 | 18 | 61  | 36.375 | 5997600000 | 7583300000 | 6150200000 | 5196400000  | 5679000000  | 5681300000 |
| sp P12694 BCKDHA  | sp P12694 | 1 | 3  | 3  | 3  | 10  | 50.47  | 0          | 0          | 0          | 0           | 52452000    | 44012000   |
| sp P12814 ACTN1   | sp P12814 | 1 | 52 | 36 | 31 | 66  | 103.06 | 1.4724E+10 | 1.5537E+10 | 1.444E+10  | 14833000000 | 13660000000 | 1.2475E+10 |
| sp P12955 PEPD    | sp P12955 | 1 | 5  | 5  | 5  | 16  | 54.548 | 183350000  | 246150000  | 274640000  | 201300000   | 230170000   | 178400000  |
| sp P12956 XRCC6   | sp P12956 | 1 | 34 | 34 | 34 | 61  | 69.842 | 2.0305E+10 | 2.1016E+10 | 2.0712E+10 | 22450000000 | 19278000000 | 2.0232E+10 |
| sp P13010 XRCC5   | sp P13010 | 1 | 33 | 33 | 33 | 57  | 82.704 | 1.5982E+10 | 1.5771E+10 | 1.6972E+10 | 15825000000 | 13582000000 | 1.7124E+10 |
| sp P13073 COX4I1  | sp P13073 | 1 | 6  | 6  | 6  | 39  | 19.576 | 3057800000 | 3119600000 | 2917800000 | 2579800000  | 3125300000  | 2289100000 |
| sp P13473 LAMP2   | sp P13473 | 1 | 3  | 3  | 3  | 7.1 | 44.96  | 146060000  | 1056700000 | 0          | 1260200000  | 908400000   | 1165500000 |
| sp P13489 RNH1    | sp P13489 | 1 | 18 | 18 | 18 | 59  | 49.973 | 2807800000 | 3209100000 | 3480500000 | 3188300000  | 2855700000  | 2926900000 |
| sp P13639 EEF2    | sp P13639 | 1 | 49 | 49 | 48 | 61  | 95.337 | 8.7703E+10 | 8.7795E+10 | 7.9036E+10 | 81272000000 | 75057000000 | 7.0376E+10 |
| sp P13667 PDIA4   | sp P13667 | 1 | 31 | 31 | 31 | 51  | 72.932 | 7846200000 | 6918600000 | 6240100000 | 7944600000  | 9194500000  | 9210400000 |
| sp P13674 P4HA1   | sp P13674 | 1 | 14 | 14 | 14 | 34  | 61.049 | 863020000  | 1003400000 | 1047000000 | 1179700000  | 1066900000  | 1136500000 |
| sp P13693 TPT1    | sp P13693 | 2 | 5  | 5  | 5  | 31  | 19.595 | 2944100000 | 3586500000 | 3168100000 | 3150800000  | 3308900000  | 2719500000 |
| sp P13797 PLS3    | sp P13797 | 2 | 36 | 36 | 33 | 59  | 70.81  | 1.987E+10  | 2.2041E+10 | 2.0289E+10 | 20180000000 | 18728000000 | 1.675E+10  |
| sp P13798 APEH    | sp P13798 | 1 | 13 | 13 | 13 | 29  | 81.224 | 1198100000 | 1251600000 | 1238100000 | 1064700000  | 1130800000  | 1133100000 |
| sp P13804 ETFA    | sp P13804 | 1 | 14 | 14 | 14 | 52  | 35.079 | 3475200000 | 2720300000 | 3184400000 | 4011400000  | 4476400000  | 4646200000 |
| sp P13807 GYS1    | sp P13807 | 1 | 10 | 10 | 10 | 21  | 83.785 | 332370000  | 378240000  | 326970000  | 351550000   | 405060000   | 282970000  |
| sp P13861 PRKAR2A | sp P13861 | 2 | 17 | 17 | 17 | 58  | 45.518 | 1556100000 | 1528900000 | 1727000000 | 1466900000  | 1431400000  | 1489600000 |
| sp P13929 ENO3    | sp P13929 | 1 | 9  | 6  | 6  | 34  | 46.986 | 346000000  | 600180000  | 511370000  | 688750000   | 867870000   | 438910000  |
| sp P13984 GTF2F2  | sp P13984 | 1 | 4  | 4  | 4  | 25  | 28.38  | 0          | 0          | 244000000  | 380200000   | 0           | 252660000  |
| sp P13987 CD59    | sp P13987 | 1 | 4  | 4  | 4  | 25  | 14.177 | 5983700000 | 6996600000 | 5811100000 | 6349900000  | 7951400000  | 6625900000 |
| sp P13995 MTHFD2  | sp P13995 | 1 | 6  | 6  | 6  | 27  | 37.895 | 541780000  | 285930000  | 587030000  | 855930000   | 682450000   | 590700000  |
| sp P14174 MIF     | sp P14174 | 1 | 4  | 4  | 4  | 37  | 12.476 | 8238700000 | 8578600000 | 8631900000 | 8646200000  | 7745200000  | 7109200000 |
| sp P14209 CD99    | sp P14209 | 1 | 3  | 3  | 3  | 30  | 18.848 | 475400000  | 362600000  | 476210000  | 376670000   | 432120000   | 493900000  |
| sp P14314 PRKCSH  | sp P14314 | 1 | 21 | 21 | 21 | 51  | 59.425 | 8574500000 | 8456100000 | 1.0539E+10 | 9565000000  | 9794200000  | 1.0223E+10 |
| sp P14324 FDPS    | sp P14324 | 1 | 8  | 8  | 8  | 22  | 48.275 | 4862400000 | 5236300000 | 4803700000 | 4388000000  | 4015600000  | 3091800000 |
| sp P14384 CPM     | sp P14384 | 1 | 2  | 2  | 2  | 10  | 50.513 | 0          | 0          | 24902000   | 28460000    | 0           | 0          |
| sp P14406 COX7A2  | sp P14406 | 1 | 2  | 2  | 2  | 28  | 9.3959 | 0          | 241670000  | 0          | 716430000   | 879310000   | 0          |
| sp P14550 AKR1A1  | sp P14550 | 1 | 16 | 16 | 16 | 63  | 36.573 | 2282700000 | 2728700000 | 2265700000 | 2090600000  | 2093200000  | 2040200000 |
| sp P14618 PKM     | sp P14618 | 2 | 37 | 37 | 37 | 72  | 57.936 | 1.5501E+11 | 1.7151E+11 | 1.763E+11  | 1.5721E+11  | 1.5621E+11  | 1.7659E+11 |

|                    |           |   |    |    |    |     |        |            |            |            |             |             |            |
|--------------------|-----------|---|----|----|----|-----|--------|------------|------------|------------|-------------|-------------|------------|
| sp P14625 HSP90B1  | sp P14625 | 2 | 38 | 36 | 36 | 51  | 92.468 | 2.5594E+10 | 2.6736E+10 | 2.9948E+10 | 30947000000 | 30942000000 | 2.8562E+10 |
| sp P14635 CCNB1    | sp P14635 | 1 | 6  | 6  | 6  | 23  | 48.337 | 416300000  | 508690000  | 496980000  | 342960000   | 291800000   | 336800000  |
| sp P63162 SNRPN    | sp P63162 | 2 | 6  | 6  | 6  | 22  | 24.614 | 2408700000 | 2276600000 | 2649200000 | 2198700000  | 2209900000  | 2230100000 |
| sp P14735 IDE      | sp P14735 | 1 | 14 | 14 | 14 | 17  | 117.97 | 937750000  | 1128600000 | 1044100000 | 978220000   | 1146900000  | 1172100000 |
| sp P14854 COX6B1   | sp P14854 | 1 | 3  | 3  | 3  | 48  | 10.192 | 998160000  | 1092600000 | 716620000  | 589920000   | 540270000   | 513670000  |
| sp P14859 POU2F1   | sp P14859 | 3 | 2  | 2  | 2  | 4.2 | 76.471 | 99584000   | 63651000   | 0          | 86276000    | 83468000    | 0          |
| sp P14866 HNRNPL   | sp P14866 | 1 | 22 | 22 | 21 | 60  | 64.132 | 1.2227E+10 | 1.6773E+10 | 1.605E+10  | 16550000000 | 15967000000 | 1.7244E+10 |
| sp P14868 DARS     | sp P14868 | 1 | 21 | 21 | 21 | 50  | 57.136 | 4954300000 | 5289600000 | 5414300000 | 4957400000  | 4601900000  | 6118000000 |
| sp P14923 JUP      | sp P14923 | 1 | 26 | 26 | 21 | 48  | 81.744 | 3166100000 | 2549200000 | 3012100000 | 2592000000  | 2578100000  | 2636500000 |
| sp P14927 UQCRB    | sp P14927 | 1 | 3  | 3  | 3  | 34  | 13.53  | 611490000  | 624490000  | 829710000  | 819120000   | 0           | 704700000  |
| sp P15104 GLUL     | sp P15104 | 1 | 2  | 2  | 2  | 6.2 | 42.064 | 95545000   | 84034000   | 87250000   | 0           | 55887000    | 0          |
| sp P15121 AKR1B1   | sp P15121 | 2 | 12 | 12 | 12 | 44  | 35.853 | 1.2198E+10 | 1.1114E+10 | 1.3224E+10 | 11592000000 | 13382000000 | 9453000000 |
| sp P15144 ANPEP    | sp P15144 | 1 | 5  | 5  | 5  | 6.7 | 109.54 | 103880000  | 106780000  | 0          | 0           | 79805000    | 0          |
| sp P15151 PVR      | sp P15151 | 1 | 2  | 2  | 2  | 8.4 | 45.302 | 277480000  | 0          | 0          | 159760000   | 0           | 335370000  |
| sp P15170 GSPT1    | sp P15170 | 1 | 17 | 17 | 10 | 39  | 55.755 | 3569400000 | 3735800000 | 3743400000 | 3883500000  | 3882400000  | 4072600000 |
| sp P15291 B4GALT1  | sp P15291 | 1 | 7  | 7  | 7  | 31  | 43.92  | 756220000  | 910860000  | 922210000  | 1109800000  | 1081200000  | 917130000  |
| sp P15311 EZR      | sp P15311 | 1 | 37 | 24 | 23 | 54  | 69.412 | 1.8397E+10 | 1.9292E+10 | 1.5393E+10 | 15816000000 | 17791000000 | 1.657E+10  |
| sp P15328 FOLR1    | sp P15328 | 1 | 6  | 6  | 6  | 27  | 29.819 | 2133000000 | 2145100000 | 2359400000 | 2546800000  | 2381800000  | 2361100000 |
| sp P15374 UCHL3    | sp P15374 | 1 | 8  | 8  | 8  | 50  | 26.182 | 1044800000 | 1357500000 | 1242600000 | 1066500000  | 1141200000  | 975720000  |
| sp P15408 FOSL2    | sp P15408 | 1 | 1  | 1  | 1  | 3.7 | 35.193 | 0          | 0          | 0          | 0           | 0           | 62781000   |
| sp P15529 CD46     | sp P15529 | 1 | 3  | 3  | 3  | 8.7 | 43.747 | 0          | 329250000  | 0          | 265030000   | 244670000   | 0          |
| sp P15531 NME1     | sp P15531 | 1 | 11 | 6  | 6  | 70  | 17.149 | 8905600000 | 7589600000 | 9029800000 | 7208800000  | 8353600000  | 9341300000 |
| sp P15559 NQO1     | sp P15559 | 1 | 11 | 11 | 11 | 39  | 30.867 | 7611600000 | 8639400000 | 7966600000 | 6357500000  | 5979200000  | 6785100000 |
| sp P15586 GNS      | sp P15586 | 1 | 4  | 4  | 4  | 8.3 | 62.081 | 114710000  | 0          | 0          | 248570000   | 531670000   | 0          |
| sp P15880 RPS2     | sp P15880 | 1 | 15 | 15 | 15 | 56  | 31.324 | 1.4748E+10 | 1.7748E+10 | 1.5651E+10 | 14741000000 | 16021000000 | 1.4176E+10 |
| sp P15924 DSP      | sp P15924 | 1 | 22 | 22 | 22 | 10  | 331.77 | 487230000  | 589870000  | 588090000  | 559310000   | 466370000   | 578840000  |
| sp P15927 RPA2     | sp P15927 | 1 | 5  | 5  | 5  | 38  | 29.247 | 1392600000 | 450510000  | 991800000  | 873580000   | 893730000   | 868590000  |
| sp P15941 MUC1     | sp P15941 | 1 | 2  | 2  | 2  | 1.8 | 122.1  | 0          | 0          | 0          | 42194000    | 90609000    | 0          |
| sp P15954 COX7C    | sp P15954 | 1 | 1  | 1  | 1  | 14  | 7.2454 | 0          | 0          | 0          | 0           | 0           | 202170000  |
| sp P16035 TIMP2    | sp P16035 | 1 | 1  | 1  | 1  | 6.4 | 24.399 | 0          | 0          | 0          | 0           | 0           | 0          |
| sp P16070 CD44     | sp P16070 | 1 | 9  | 9  | 9  | 12  | 81.537 | 5323800000 | 4907700000 | 4465800000 | 4622300000  | 5565100000  | 5754700000 |
| sp P16083 NQO2     | sp P16083 | 1 | 3  | 3  | 3  | 20  | 25.918 | 355220000  | 386160000  | 319100000  | 418370000   | 466220000   | 366530000  |
| sp P16144 ITGB4    | sp P16144 | 1 | 7  | 7  | 7  | 6.5 | 202.16 | 155180000  | 156220000  | 183350000  | 134850000   | 124960000   | 142170000  |
| sp P16152 CBR1     | sp P16152 | 1 | 15 | 15 | 13 | 65  | 30.375 | 7114700000 | 7288100000 | 7872900000 | 7913700000  | 6662300000  | 5944000000 |
| sp P16220 CREB1    | sp P16220 | 1 | 3  | 3  | 2  | 15  | 36.688 | 0          | 0          | 0          | 0           | 210120000   | 0          |
| sp P16278 GLB1     | sp P16278 | 1 | 2  | 2  | 2  | 4.4 | 76.074 | 80289000   | 105180000  | 0          | 113890000   | 94695000    | 0          |
| sp P16401 HIST1H1E | sp P16401 | 1 | 5  | 5  | 5  | 22  | 22.58  | 5879100000 | 8790900000 | 8572200000 | 6867300000  | 10580000000 | 1.1919E+10 |
| sp P16402 HIST1H1L | sp P16402 | 1 | 7  | 1  | 1  | 23  | 22.35  | 0          | 0          | 0          | 0           | 0           | 208340000  |
| sp P16403 HIST1H1C | sp P16403 | 2 | 7  | 7  | 1  | 24  | 21.364 | 1.9977E+10 | 2.4118E+10 | 2.2931E+10 | 25697000000 | 34939000000 | 2.7908E+10 |

|                  |           |   |    |    |    |     |        |            |            |            |             |             |            |
|------------------|-----------|---|----|----|----|-----|--------|------------|------------|------------|-------------|-------------|------------|
| sp P16435 POR    | sp P16435 | 1 | 16 | 16 | 16 | 29  | 76.689 | 1234800000 | 1088100000 | 1186400000 | 1437300000  | 1535000000  | 1166000000 |
| sp P16455 MGMT   | sp P16455 | 1 | 3  | 3  | 3  | 22  | 21.646 | 0          | 99754000   | 94263000   | 156780000   | 0           | 87667000   |
| sp P16520 GNB3   | sp P16520 | 1 | 3  | 1  | 1  | 7.1 | 37.221 | 0          | 506490000  | 0          | 0           | 0           | 0          |
| sp P16615 ATP2A2 | sp P16615 | 3 | 40 | 40 | 40 | 45  | 114.76 | 6236400000 | 6919700000 | 6904600000 | 7957500000  | 7723300000  | 7998000000 |
| sp P16930 FAH    | sp P16930 | 1 | 3  | 3  | 3  | 12  | 46.374 | 84751000   | 84856000   | 154700000  | 93026000    | 81005000    | 123170000  |
| sp P16949 STMN1  | sp P16949 | 1 | 6  | 6  | 5  | 38  | 17.302 | 2919500000 | 3356300000 | 3099500000 | 3525900000  | 2687400000  | 2793000000 |
| sp P16989 YBX3   | sp P16989 | 1 | 12 | 8  | 8  | 58  | 40.089 | 1854800000 | 1802000000 | 2279800000 | 1609600000  | 1887000000  | 2131100000 |
| sp P17066 HSPA6  | sp P17066 | 2 | 11 | 2  | 2  | 17  | 71.027 | 7146000000 | 1.1878E+10 | 9203700000 | 11591000000 | 11924000000 | 1.8096E+10 |
| sp P17096 HMGA1  | sp P17096 | 1 | 4  | 4  | 4  | 41  | 11.676 | 1800200000 | 1092400000 | 1809000000 | 804390000   | 1230600000  | 1221200000 |
| sp P17152 TMEM11 | sp P17152 | 1 | 2  | 2  | 2  | 13  | 21.541 | 0          | 0          | 0          | 0           | 156980000   | 0          |
| sp P17174 GOT1   | sp P17174 | 1 | 16 | 16 | 16 | 51  | 46.247 | 2724000000 | 2552900000 | 2560000000 | 3014300000  | 2785700000  | 2251300000 |
| sp P17252 PRKCA  | sp P17252 | 3 | 11 | 11 | 11 | 26  | 76.749 | 800260000  | 670610000  | 705280000  | 677810000   | 794530000   | 786280000  |
| sp P17275 JUNB   | sp P17275 | 1 | 5  | 5  | 5  | 27  | 35.879 | 0          | 0          | 0          | 201920000   | 240230000   | 253540000  |
| sp P17301 ITGA2  | sp P17301 | 1 | 15 | 15 | 15 | 23  | 129.29 | 492550000  | 328070000  | 460040000  | 457220000   | 503890000   | 612870000  |
| sp P17342 NPR3   | sp P17342 | 1 | 2  | 2  | 2  | 6.1 | 59.807 | 0          | 0          | 0          | 0           | 85157000    | 0          |
| sp P17480 UBTF   | sp P17480 | 1 | 12 | 12 | 12 | 18  | 89.405 | 689740000  | 816350000  | 539900000  | 760080000   | 716910000   | 583240000  |
| sp P17544 ATF7   | sp P17544 | 1 | 2  | 2  | 2  | 6.7 | 52.967 | 48140000   | 0          | 0          | 0           | 0           | 0          |
| sp P17612 PRKACA | sp P17612 | 1 | 11 | 3  | 3  | 37  | 40.589 | 307220000  | 258410000  | 234160000  | 247170000   | 305890000   | 365930000  |
| sp P17655 CAPN2  | sp P17655 | 1 | 23 | 23 | 23 | 44  | 79.994 | 5941900000 | 5773500000 | 5400600000 | 5812900000  | 6152200000  | 6162200000 |
| sp P17676 CEBPB  | sp P17676 | 1 | 4  | 4  | 4  | 17  | 36.105 | 381150000  | 980070000  | 0          | 0           | 513210000   | 0          |
| sp P17812 CTPS1  | sp P17812 | 1 | 21 | 21 | 20 | 47  | 66.69  | 4831300000 | 4885200000 | 4225400000 | 5492900000  | 5702100000  | 6181300000 |
| sp P17813 ENG    | sp P17813 | 1 | 8  | 8  | 8  | 17  | 70.577 | 871830000  | 815640000  | 931490000  | 729850000   | 842950000   | 717570000  |
| sp P17844 DDX5   | sp P17844 | 1 | 34 | 34 | 25 | 54  | 69.147 | 1.5712E+10 | 1.6944E+10 | 1.4925E+10 | 17048000000 | 15705000000 | 1.6361E+10 |
| sp P17858 PFKL   | sp P17858 | 1 | 14 | 10 | 10 | 23  | 85.018 | 673050000  | 465360000  | 664330000  | 744030000   | 747710000   | 774460000  |
| sp P17900 GM2A   | sp P17900 | 1 | 2  | 2  | 2  | 16  | 20.838 | 61554000   | 54864000   | 65581000   | 0           | 70185000    | 0          |
| sp P17931 LGALS3 | sp P17931 | 1 | 6  | 6  | 6  | 29  | 26.152 | 2187900000 | 1904300000 | 1568200000 | 1686900000  | 2257000000  | 2073500000 |
| sp P17980 PSMC3  | sp P17980 | 1 | 23 | 23 | 23 | 60  | 49.203 | 4957400000 | 5218700000 | 4907200000 | 4994500000  | 4621400000  | 4681000000 |
| sp P17987 TCP1   | sp P17987 | 1 | 28 | 28 | 28 | 67  | 60.343 | 1.7282E+10 | 1.5785E+10 | 1.6135E+10 | 18915000000 | 20543000000 | 1.6302E+10 |
| sp P18031 PTPN1  | sp P18031 | 1 | 11 | 11 | 11 | 33  | 49.966 | 1134400000 | 1232300000 | 1192800000 | 1039300000  | 1042000000  | 1589500000 |
| sp P18077 RPL35A | sp P18077 | 1 | 3  | 3  | 3  | 21  | 12.538 | 2952100000 | 3386200000 | 2557900000 | 3351300000  | 4047500000  | 4062800000 |
| sp P18084 ITGB5  | sp P18084 | 1 | 3  | 3  | 3  | 5.5 | 88.053 | 64656000   | 0          | 0          | 0           | 0           | 58353000   |
| sp P18085 ARF4   | sp P18085 | 1 | 10 | 10 | 6  | 64  | 20.511 | 5372000000 | 5286500000 | 4939700000 | 5191600000  | 4873900000  | 5482800000 |
| sp P18124 RPL7   | sp P18124 | 1 | 18 | 18 | 18 | 58  | 29.225 | 1.5049E+10 | 1.5308E+10 | 1.3948E+10 | 17460000000 | 19500000000 | 1.6683E+10 |
| sp P18206 VCL    | sp P18206 | 1 | 49 | 49 | 49 | 51  | 123.8  | 1.9579E+10 | 2.0098E+10 | 2.0625E+10 | 18953000000 | 19218000000 | 2.1061E+10 |
| sp P18564 ITGB6  | sp P18564 | 1 | 1  | 1  | 1  | 1.1 | 85.935 | 0          | 0          | 0          | 0           | 0           | 375810000  |
| sp P18583 SON    | sp P18583 | 1 | 14 | 14 | 14 | 9.4 | 263.83 | 904270000  | 837980000  | 876560000  | 580540000   | 928680000   | 841930000  |
| sp P18615 NELFE  | sp P18615 | 1 | 5  | 5  | 5  | 21  | 43.239 | 225340000  | 256700000  | 249460000  | 210440000   | 265490000   | 204660000  |
| sp P18621 RPL17  | sp P18621 | 1 | 8  | 8  | 8  | 47  | 21.397 | 9821500000 | 1.0133E+10 | 9367400000 | 9246200000  | 8454200000  | 1.0179E+10 |
| sp P18669 PGAM1  | sp P18669 | 3 | 17 | 17 | 17 | 71  | 28.804 | 2.6206E+10 | 2.7411E+10 | 2.7024E+10 | 21406000000 | 25163000000 | 3.0191E+10 |

|           |         |           |   |    |    |    |     |        |            |            |            |             |             |            |
|-----------|---------|-----------|---|----|----|----|-----|--------|------------|------------|------------|-------------|-------------|------------|
| sp P18754 | RCC1    | sp P18754 | 1 | 13 | 13 | 13 | 54  | 44.969 | 2398800000 | 2532300000 | 2547400000 | 2631800000  | 2818100000  | 2679500000 |
| sp P18846 | ATF1    | sp P18846 | 1 | 2  | 1  | 1  | 13  | 29.232 | 0          | 0          | 0          | 0           | 0           | 32234000   |
| sp P18858 | LIG1    | sp P18858 | 1 | 5  | 5  | 5  | 8.5 | 101.73 | 207810000  | 223860000  | 240860000  | 181950000   | 169680000   | 220060000  |
| sp P18859 | ATP5J   | sp P18859 | 1 | 6  | 6  | 6  | 52  | 12.587 | 1425700000 | 1650000000 | 1281900000 | 1679500000  | 1663700000  | 1635200000 |
| sp P18887 | XRCC1   | sp P18887 | 1 | 4  | 4  | 4  | 8.8 | 69.476 | 0          | 309620000  | 0          | 0           | 220150000   | 0          |
| sp P19022 | CDH2    | sp P19022 | 2 | 10 | 10 | 10 | 20  | 99.808 | 359300000  | 380510000  | 381980000  | 491890000   | 444730000   | 452410000  |
| sp P19174 | PLCG1   | sp P19174 | 1 | 4  | 4  | 4  | 3.9 | 148.53 | 1247900000 | 0          | 0          | 0           | 0           | 0          |
| sp P19256 | CD58    | sp P19256 | 1 | 2  | 2  | 2  | 11  | 28.147 | 94678000   | 0          | 0          | 0           | 0           | 0          |
| sp P19338 | NCL     | sp P19338 | 1 | 27 | 27 | 27 | 34  | 76.613 | 2.8567E+10 | 2.7698E+10 | 2.9328E+10 | 27759000000 | 26391000000 | 2.7148E+10 |
| sp P19367 | HK1     | sp P19367 | 2 | 26 | 26 | 22 | 36  | 102.48 | 1852300000 | 1929200000 | 2211800000 | 2208700000  | 2042000000  | 2310500000 |
| sp P19387 | POLR2C  | sp P19387 | 1 | 5  | 5  | 5  | 27  | 31.441 | 281130000  | 231110000  | 196160000  | 190180000   | 309350000   | 230820000  |
| sp P19388 | POLR2E  | sp P19388 | 1 | 5  | 5  | 5  | 27  | 24.551 | 732890000  | 713930000  | 603000000  | 557080000   | 586840000   | 623930000  |
| sp P19404 | NDUFV2  | sp P19404 | 1 | 4  | 4  | 4  | 21  | 27.391 | 246830000  | 328710000  | 284380000  | 301470000   | 219530000   | 226030000  |
| sp P19525 | EIF2AK2 | sp P19525 | 1 | 11 | 11 | 11 | 27  | 62.094 | 788810000  | 959300000  | 750420000  | 809240000   | 869430000   | 828040000  |
| sp P19623 | SRM     | sp P19623 | 1 | 14 | 14 | 14 | 71  | 33.824 | 2565700000 | 2717800000 | 2587800000 | 2499100000  | 2925800000  | 3077500000 |
| sp P19784 | CSNK2A2 | sp P19784 | 1 | 6  | 6  | 6  | 26  | 41.213 | 264690000  | 485340000  | 330160000  | 471850000   | 315820000   | 306920000  |
| sp P19838 | NFKB1   | sp P19838 | 1 | 4  | 4  | 4  | 7.1 | 105.35 | 0          | 0          | 0          | 107990000   | 0           | 0          |
| sp P19971 | TYMP    | sp P19971 | 1 | 5  | 5  | 5  | 18  | 49.955 | 42667000   | 43171000   | 43034000   | 44799000    | 68524000    | 54664000   |
| sp P20020 | ATP2B1  | sp P20020 | 3 | 14 | 7  | 7  | 17  | 138.75 | 310140000  | 157450000  | 300380000  | 217970000   | 251150000   | 215250000  |
| sp P20042 | EIF2S2  | sp P20042 | 1 | 15 | 15 | 15 | 54  | 38.388 | 5223400000 | 5944700000 | 4494000000 | 5498000000  | 5683900000  | 6562600000 |
| sp P20073 | ANXA7   | sp P20073 | 1 | 10 | 10 | 10 | 24  | 52.739 | 1402800000 | 1460100000 | 1422800000 | 1300400000  | 1417200000  | 1625400000 |
| sp P20290 | BTF3    | sp P20290 | 1 | 10 | 10 | 10 | 64  | 22.168 | 4221500000 | 3795600000 | 3741400000 | 2591900000  | 3040600000  | 2467600000 |
| sp P20336 | RAB3A   | sp P20336 | 1 | 3  | 2  | 1  | 14  | 24.984 | 0          | 0          | 0          | 0           | 82775000    | 68160000   |
| sp P20338 | RAB4A   | sp P20338 | 1 | 3  | 3  | 3  | 17  | 24.389 | 0          | 0          | 0          | 152790000   | 0           | 0          |
| sp P20339 | RAB5A   | sp P20339 | 1 | 8  | 5  | 5  | 50  | 23.658 | 335840000  | 253200000  | 210990000  | 180790000   | 275340000   | 281810000  |
| sp P20340 | RAB6A   | sp P20340 | 3 | 9  | 9  | 8  | 47  | 23.593 | 3405700000 | 3660100000 | 3479800000 | 3339000000  | 4257500000  | 3239600000 |
| sp P20585 | MSH3    | sp P20585 | 1 | 3  | 3  | 3  | 2.9 | 127.41 | 0          | 0          | 0          | 0           | 48588000    | 0          |
| sp P20618 | PSMB1   | sp P20618 | 1 | 9  | 9  | 9  | 43  | 26.489 | 4721800000 | 5929800000 | 5940200000 | 4698900000  | 5240200000  | 5403300000 |
| sp P20645 | M6PR    | sp P20645 | 1 | 5  | 5  | 5  | 21  | 30.993 | 752500000  | 835940000  | 720150000  | 687630000   | 810990000   | 899610000  |
| sp P20674 | COX5A   | sp P20674 | 1 | 8  | 8  | 8  | 53  | 16.762 | 2066800000 | 2876200000 | 1747800000 | 1692000000  | 1865900000  | 2101800000 |
| sp P20700 | LMNB1   | sp P20700 | 1 | 34 | 32 | 32 | 61  | 66.408 | 1.3928E+10 | 1.2019E+10 | 1.364E+10  | 13197000000 | 13583000000 | 1.2633E+10 |
| sp P20810 | CAST    | sp P20810 | 1 | 23 | 23 | 23 | 49  | 76.572 | 4534900000 | 4910300000 | 4744400000 | 4298700000  | 5015400000  | 4280800000 |
| sp P20839 | IMPDH1  | sp P20839 | 1 | 13 | 12 | 12 | 36  | 55.405 | 930750000  | 1531100000 | 1233100000 | 1191000000  | 1093100000  | 1134100000 |
| sp P20908 | COL5A1  | sp P20908 | 1 | 10 | 10 | 10 | 9.6 | 183.56 | 566940000  | 522500000  | 534490000  | 227900000   | 317340000   | 317870000  |
| sp P20936 | RASA1   | sp P20936 | 1 | 1  | 1  | 1  | 1.3 | 116.4  | 0          | 0          | 0          | 0           | 0           | 0          |
| sp P20962 | PTMS    | sp P20962 | 1 | 5  | 5  | 5  | 27  | 11.53  | 3776100000 | 3023500000 | 3882600000 | 2777800000  | 2644600000  | 3854500000 |
| sp Q9UQ8  | CDK11A  | sp Q9UQ8  | 3 | 6  | 6  | 6  | 10  | 91.361 | 331960000  | 327370000  | 408650000  | 298990000   | 367210000   | 317910000  |
| sp P21266 | GSTM3   | sp P21266 | 1 | 14 | 14 | 13 | 64  | 26.559 | 4107900000 | 3795900000 | 4141300000 | 4533200000  | 4250200000  | 4019600000 |
| sp P21281 | ATP6V1B | sp P21281 | 2 | 10 | 10 | 10 | 25  | 56.5   | 776050000  | 683850000  | 771120000  | 952490000   | 650630000   | 947240000  |



|                   |           |   |    |     |    |     |        |            |            |            |             |             |            |
|-------------------|-----------|---|----|-----|----|-----|--------|------------|------------|------------|-------------|-------------|------------|
| sp P21283 ATP6V1C | sp P21283 | 1 | 9  | 9   | 9  | 27  | 43.941 | 466510000  | 484580000  | 476890000  | 531220000   | 444290000   | 481840000  |
| sp P21297 CSRP1   | sp P21297 | 1 | 11 | 11  | 11 | 65  | 20.567 | 2.2442E+10 | 1.9896E+10 | 2.2922E+10 | 17407000000 | 19416000000 | 2.3993E+10 |
| sp P21333 FLNA    | sp P21333 | 1 | ## | 124 | ## | 70  | 280.74 | 2.5025E+11 | 2.7088E+11 | 2.3951E+11 | 2.4019E+11  | 2.4469E+11  | 2.5235E+11 |
| sp P21399 ACO1    | sp P21399 | 2 | 23 | 23  | 23 | 36  | 98.398 | 2071800000 | 2165600000 | 1901200000 | 2453200000  | 1949400000  | 1920600000 |
| sp P21796 VDAC1   | sp P21796 | 1 | 15 | 15  | 15 | 75  | 30.772 | 1.6012E+10 | 1.6262E+10 | 2.1321E+10 | 18756000000 | 17905000000 | 1.5202E+10 |
| sp P21912 SDHB    | sp P21912 | 1 | 4  | 4   | 4  | 18  | 31.629 | 0          | 553650000  | 539250000  | 281510000   | 0           | 681310000  |
| sp P21926 CD9     | sp P21926 | 1 | 3  | 3   | 3  | 18  | 25.416 | 577800000  | 642700000  | 815480000  | 713640000   | 905120000   | 972800000  |
| sp P21964 COMT    | sp P21964 | 1 | 9  | 9   | 9  | 45  | 30.037 | 1197100000 | 1305900000 | 1163300000 | 1377200000  | 1195200000  | 1376200000 |
| sp P21980 TGM2    | sp P21980 | 1 | 12 | 12  | 12 | 23  | 77.328 | 634900000  | 619070000  | 615440000  | 727730000   | 727150000   | 727680000  |
| sp P22033 MUT     | sp P22033 | 1 | 3  | 3   | 3  | 6.4 | 83.134 | 0          | 114920000  | 0          | 90328000    | 124580000   | 178770000  |
| sp P22059 OSBP    | sp P22059 | 2 | 10 | 10  | 10 | 18  | 89.42  | 563090000  | 512220000  | 360330000  | 623460000   | 514910000   | 575020000  |
| sp P22067 PCMT1   | sp P22067 | 1 | 7  | 7   | 7  | 52  | 24.636 | 1851800000 | 2210300000 | 2383400000 | 2185200000  | 1963400000  | 2429600000 |
| sp P22087 FBL     | sp P22087 | 1 | 10 | 10  | 9  | 40  | 33.784 | 3378100000 | 2974100000 | 3364500000 | 3477000000  | 4242800000  | 3114100000 |
| sp P22102 GART    | sp P22102 | 1 | 29 | 29  | 29 | 46  | 107.77 | 6093000000 | 5801600000 | 5789400000 | 5630900000  | 5202800000  | 4907400000 |
| sp P22234 PAICS   | sp P22234 | 1 | 22 | 22  | 22 | 52  | 47.079 | 1.209E+10  | 1.2638E+10 | 1.4035E+10 | 12577000000 | 10858000000 | 1.2494E+10 |
| sp P22307 SCP2    | sp P22307 | 1 | 8  | 8   | 8  | 14  | 58.993 | 1115200000 | 1467700000 | 1239100000 | 1603700000  | 1929800000  | 1257600000 |
| sp P22314 UBA1    | sp P22314 | 1 | 38 | 38  | 38 | 50  | 117.85 | 2.1066E+10 | 2.1785E+10 | 2.0205E+10 | 19907000000 | 21334000000 | 1.9963E+10 |
| sp P22392 NME2    | sp P22392 | 1 | 11 | 11  | 1  | 76  | 17.298 | 3.4079E+10 | 3.4449E+10 | 3.9687E+10 | 33183000000 | 31044000000 | 3.0786E+10 |
| sp P22570 FDXR    | sp P22570 | 1 | 2  | 2   | 2  | 5.7 | 53.836 | 0          | 0          | 0          | 0           | 0           | 36424000   |
| sp P22612 PRKACG  | sp P22612 | 1 | 3  | 1   | 1  | 15  | 40.434 | 0          | 0          | 0          | 0           | 0           | 55794000   |
| sp P22626 HNRNPA2 | sp P22626 | 1 | 20 | 20  | 20 | 65  | 37.429 | 5.1008E+10 | 4.8248E+10 | 4.3576E+10 | 44845000000 | 42984000000 | 5.2309E+10 |
| sp P22694 PRKACB  | sp P22694 | 1 | 12 | 12  | 4  | 46  | 40.622 | 911760000  | 1145800000 | 1113300000 | 1033200000  | 1190300000  | 1022000000 |
| sp P22695 UQCRC2  | sp P22695 | 1 | 17 | 17  | 17 | 55  | 48.442 | 4659700000 | 3813600000 | 4657500000 | 4933500000  | 5297000000  | 5785200000 |
| sp P22830 FECH    | sp P22830 | 1 | 3  | 3   | 3  | 10  | 47.862 | 0          | 336700000  | 0          | 0           | 321230000   | 389640000  |
| sp P23142 FBLN1   | sp P23142 | 1 | 1  | 1   | 1  | 2.4 | 77.213 | 0          | 0          | 0          | 0           | 0           | 0          |
| sp P23193 TCEA1   | sp P23193 | 2 | 13 | 13  | 13 | 50  | 33.969 | 1660600000 | 1653900000 | 1553800000 | 1701400000  | 1725100000  | 1794800000 |
| sp P23229 ITGA6   | sp P23229 | 1 | 16 | 16  | 16 | 18  | 126.6  | 886190000  | 721650000  | 754890000  | 706080000   | 809360000   | 848940000  |
| sp P23246 SFPQ    | sp P23246 | 1 | 31 | 31  | 30 | 51  | 76.149 | 1.9755E+10 | 2.2124E+10 | 2.1805E+10 | 23641000000 | 23356000000 | 2.4604E+10 |
| sp P23258 TUBG1   | sp P23258 | 2 | 11 | 11  | 11 | 43  | 51.169 | 912340000  | 787280000  | 637220000  | 721340000   | 622970000   | 801010000  |
| sp P23284 PPIB    | sp P23284 | 1 | 14 | 14  | 14 | 55  | 23.742 | 1.4327E+10 | 1.5546E+10 | 1.2542E+10 | 16475000000 | 17307000000 | 1.6499E+10 |
| sp P23368 ME2     | sp P23368 | 1 | 12 | 12  | 12 | 34  | 65.443 | 893100000  | 1119700000 | 899580000  | 1193200000  | 943650000   | 994660000  |
| sp P23381 WARS    | sp P23381 | 1 | 16 | 16  | 16 | 48  | 53.165 | 1760100000 | 1996100000 | 1831300000 | 2387400000  | 2383200000  | 1948700000 |
| sp P23396 RPS3    | sp P23396 | 1 | 19 | 19  | 19 | 78  | 26.688 | 2.4891E+10 | 2.4967E+10 | 2.5093E+10 | 23858000000 | 25371000000 | 2.4262E+10 |
| sp P23434 GCSH    | sp P23434 | 1 | 4  | 4   | 4  | 56  | 18.884 | 0          | 682840000  | 501170000  | 474690000   | 629100000   | 639250000  |
| sp P23497 SP100   | sp P23497 | 1 | 4  | 2   | 1  | 4   | 100.42 | 84924000   | 90444000   | 100200000  | 91429000    | 82549000    | 0          |
| sp P23526 AHCY    | sp P23526 | 1 | 20 | 20  | 20 | 45  | 47.716 | 1.0735E+10 | 1.1512E+10 | 1.0352E+10 | 9686400000  | 10166000000 | 1.0092E+10 |
| sp P23528 CFL1    | sp P23528 | 1 | 15 | 15  | 12 | 74  | 18.502 | 6.1341E+10 | 6.1346E+10 | 6.8193E+10 | 55989000000 | 52619000000 | 5.4968E+10 |
| sp P23588 EIF4B   | sp P23588 | 1 | 16 | 16  | 16 | 35  | 69.15  | 4401200000 | 4773400000 | 4267700000 | 3387200000  | 3456500000  | 3516000000 |
| sp P23634 ATP2B4  | sp P23634 | 1 | 16 | 16  | 9  | 18  | 137.92 | 830420000  | 929610000  | 859660000  | 804370000   | 750690000   | 1016900000 |

|                   |           |   |    |    |    |     |        |            |            |            |             |             |            |
|-------------------|-----------|---|----|----|----|-----|--------|------------|------------|------------|-------------|-------------|------------|
| sp P23743 DGKA    | sp P23743 | 1 | 1  | 1  | 1  | 3   | 82.629 | 0          | 0          | 0          | 0           | 0           | 27986000   |
| sp P23786 CPT2    | sp P23786 | 1 | 9  | 9  | 9  | 20  | 73.776 | 240180000  | 197260000  | 208650000  | 200960000   | 232220000   | 204300000  |
| sp P23919 DTYMK   | sp P23919 | 1 | 10 | 10 | 10 | 45  | 23.819 | 1443900000 | 1323700000 | 1411100000 | 1202000000  | 1406300000  | 1534000000 |
| sp P23921 RRM1    | sp P23921 | 1 | 33 | 33 | 33 | 55  | 90.069 | 6612200000 | 7085900000 | 6531100000 | 5633700000  | 6067200000  | 5983500000 |
| sp P24386 CHM     | sp P24386 | 1 | 1  | 1  | 1  | 3.5 | 73.475 | 0          | 0          | 0          | 0           | 0           | 52228000   |
| sp P24390 KDELRL  | sp P24390 | 2 | 2  | 2  | 2  | 14  | 24.542 | 109720000  | 0          | 62656000   | 0           | 0           | 0          |
| sp P24534 EEF1B2  | sp P24534 | 1 | 10 | 8  | 8  | 64  | 24.763 | 1.3285E+10 | 9859200000 | 5545200000 | 10731000000 | 11102000000 | 9473600000 |
| sp P24539 ATP5F1  | sp P24539 | 1 | 9  | 9  | 9  | 35  | 28.908 | 5847400000 | 4157900000 | 4813200000 | 6756200000  | 6116200000  | 7200200000 |
| sp P24666 ACP1    | sp P24666 | 1 | 7  | 7  | 7  | 65  | 18.042 | 1613300000 | 1411800000 | 1217400000 | 1688700000  | 1802600000  | 1569900000 |
| sp P24752 ACAT1   | sp P24752 | 1 | 12 | 12 | 12 | 43  | 45.199 | 1309800000 | 1480000000 | 1367100000 | 1574300000  | 1586500000  | 1825600000 |
| sp P24844 MYL9    | sp P24844 | 1 | 8  | 3  | 3  | 62  | 19.827 | 332570000  | 367600000  | 544440000  | 451340000   | 321680000   | 344870000  |
| sp P24928 POLR2A  | sp P24928 | 1 | 8  | 8  | 8  | 8   | 217.17 | 351690000  | 267770000  | 363070000  | 230810000   | 321470000   | 272370000  |
| sp P24941 CDK2    | sp P24941 | 2 | 8  | 7  | 7  | 36  | 33.929 | 862340000  | 858690000  | 849290000  | 744540000   | 939360000   | 815110000  |
| sp P25205 MCM3    | sp P25205 | 1 | 35 | 35 | 35 | 55  | 90.98  | 5884800000 | 6241200000 | 5832600000 | 5774500000  | 5510400000  | 5157900000 |
| sp P25325 MPST    | sp P25325 | 1 | 6  | 6  | 6  | 35  | 33.178 | 522410000  | 368230000  | 460270000  | 542140000   | 357250000   | 377280000  |
| sp P25398 RPS12   | sp P25398 | 1 | 8  | 8  | 8  | 71  | 14.515 | 1.5958E+10 | 1.3419E+10 | 1.8667E+10 | 15195000000 | 19356000000 | 1.578E+10  |
| sp P25440 BRD2    | sp P25440 | 1 | 6  | 6  | 6  | 14  | 88.06  | 241810000  | 0          | 311880000  | 252590000   | 0           | 0          |
| sp P25685 DNAJB1  | sp P25685 | 1 | 14 | 14 | 13 | 49  | 38.044 | 2064100000 | 2059900000 | 1839700000 | 2178800000  | 2362600000  | 2375200000 |
| sp P25686 DNAJB2  | sp P25686 | 1 | 1  | 1  | 1  | 3.4 | 35.58  | 0          | 0          | 0          | 0           | 18226000    | 0          |
| sp P25705 ATP5F1A | sp P25705 | 1 | 26 | 26 | 26 | 51  | 59.75  | 2.0758E+10 | 2.1994E+10 | 2.1588E+10 | 23453000000 | 25241000000 | 2.6528E+10 |
| sp P25786 PSMA1   | sp P25786 | 1 | 16 | 16 | 16 | 50  | 29.555 | 4227700000 | 4662200000 | 4968700000 | 4108400000  | 4152900000  | 3790000000 |
| sp P25787 PSMA2   | sp P25787 | 1 | 9  | 9  | 9  | 47  | 25.898 | 2407200000 | 3532100000 | 2633600000 | 2431500000  | 2131000000  | 2301000000 |
| sp P25788 PSMA3   | sp P25788 | 1 | 12 | 12 | 12 | 43  | 28.433 | 2790100000 | 2675400000 | 3134000000 | 3142900000  | 2787200000  | 2870500000 |
| sp P25789 PSMA4   | sp P25789 | 1 | 11 | 11 | 11 | 53  | 29.483 | 7028000000 | 6182100000 | 6007300000 | 5239200000  | 6447000000  | 5026800000 |
| sp P25815 S100P   | sp P25815 | 1 | 2  | 2  | 2  | 24  | 10.4   | 0          | 134070000  | 0          | 0           | 286350000   | 263480000  |
| sp P26006 ITGA3   | sp P26006 | 1 | 5  | 5  | 5  | 5.9 | 116.61 | 0          | 492290000  | 424130000  | 243800000   | 284710000   | 0          |
| sp P26038 MSN     | sp P26038 | 1 | 43 | 43 | 28 | 63  | 67.819 | 5.9503E+10 | 6.5256E+10 | 5.3495E+10 | 54865000000 | 54141000000 | 5.1556E+10 |
| sp P26196 DDX6    | sp P26196 | 1 | 13 | 13 | 13 | 37  | 54.416 | 1754900000 | 1436000000 | 1482000000 | 1393000000  | 1405600000  | 1429300000 |
| sp P26232 CTNNA2  | sp P26232 | 1 | 9  | 1  | 1  | 12  | 105.31 | 174130000  | 0          | 206130000  | 154330000   | 0           | 146360000  |
| sp P26358 DNMT1   | sp P26358 | 1 | 23 | 23 | 23 | 21  | 183.16 | 926250000  | 951850000  | 1088800000 | 819250000   | 1048000000  | 855900000  |
| sp P26368 U2AF2   | sp P26368 | 1 | 13 | 13 | 13 | 44  | 53.5   | 4123600000 | 4366400000 | 4161400000 | 4291700000  | 5287800000  | 3797200000 |
| sp P26373 RPL13   | sp P26373 | 1 | 9  | 9  | 9  | 42  | 24.261 | 1.1384E+10 | 1.0861E+10 | 9576800000 | 11312000000 | 12747000000 | 9322700000 |
| sp P26374 CHML    | sp P26374 | 1 | 1  | 1  | 1  | 2.9 | 74.071 | 0          | 0          | 0          | 0           | 0           | 35687000   |
| sp P26440 IVD     | sp P26440 | 1 | 2  | 2  | 2  | 5.9 | 46.319 | 0          | 0          | 0          | 0           | 0           | 153290000  |
| sp P26447 S100A4  | sp P26447 | 1 | 5  | 5  | 5  | 37  | 11.728 | 1.2187E+10 | 1.2491E+10 | 1.3265E+10 | 10807000000 | 11604000000 | 1.1301E+10 |
| sp P26583 HMGB2   | sp P26583 | 1 | 8  | 7  | 7  | 29  | 24.033 | 3370500000 | 2665400000 | 3760100000 | 3326500000  | 3837900000  | 3561400000 |
| sp P26599 PTBP1   | sp P26599 | 1 | 16 | 16 | 14 | 50  | 57.221 | 1.1161E+10 | 1.2342E+10 | 1.1164E+10 | 11557000000 | 11710000000 | 1.2619E+10 |
| sp P26639 TARS    | sp P26639 | 2 | 36 | 36 | 36 | 55  | 83.434 | 2.9403E+10 | 2.953E+10  | 2.6604E+10 | 32932000000 | 30635000000 | 2.8372E+10 |
| sp P26640 VARS    | sp P26640 | 1 | 37 | 37 | 37 | 40  | 140.47 | 5057200000 | 6082900000 | 4684700000 | 5063300000  | 5436400000  | 5444100000 |

|                  |           |   |    |    |    |     |        |            |            |            |             |             |            |
|------------------|-----------|---|----|----|----|-----|--------|------------|------------|------------|-------------|-------------|------------|
| sp P26641 EEF1G  | sp P26641 | 1 | 22 | 22 | 22 | 52  | 50.118 | 2.4991E+10 | 2.6193E+10 | 2.4352E+10 | 26140000000 | 25579000000 | 2.424E+10  |
| sp P26885 FKBP2  | sp P26885 | 1 | 5  | 5  | 5  | 47  | 15.649 | 832580000  | 501470000  | 1271900000 | 1085200000  | 1436400000  | 1134500000 |
| sp P27105 STOM   | sp P27105 | 1 | 10 | 10 | 10 | 49  | 31.73  | 2810600000 | 3047000000 | 3727700000 | 2770500000  | 2972000000  | 2913400000 |
| sp P27144 AK4    | sp P27144 | 1 | 6  | 6  | 6  | 40  | 25.268 | 243100000  | 554770000  | 542620000  | 424580000   | 615390000   | 809080000  |
| sp P27348 YWHAQ  | sp P27348 | 1 | 14 | 10 | 10 | 54  | 27.764 | 2.0774E+10 | 1.6819E+10 | 1.9166E+10 | 17752000000 | 16400000000 | 1.6796E+10 |
| sp P27361 MAPK3  | sp P27361 | 1 | 5  | 2  | 2  | 19  | 43.135 | 0          | 0          | 0          | 0           | 0           | 73252000   |
| sp P27635 RPL10  | sp P27635 | 2 | 9  | 9  | 9  | 43  | 24.604 | 8724100000 | 1.0239E+10 | 9054200000 | 8456200000  | 9718000000  | 9303400000 |
| sp P27694 RPA1   | sp P27694 | 1 | 19 | 19 | 19 | 39  | 68.137 | 2826800000 | 2693400000 | 2596800000 | 2381600000  | 2580500000  | 2606800000 |
| sp P27695 APEX1  | sp P27695 | 1 | 15 | 15 | 15 | 55  | 35.554 | 5798000000 | 5113700000 | 6707800000 | 5229200000  | 5327900000  | 4589700000 |
| sp P27707 DCK    | sp P27707 | 1 | 5  | 5  | 5  | 24  | 30.518 | 231930000  | 98193000   | 273230000  | 168220000   | 265660000   | 185410000  |
| sp P27708 CAD    | sp P27708 | 1 | 49 | 46 | 46 | 32  | 242.98 | 5128900000 | 4413700000 | 4741600000 | 4595900000  | 4707800000  | 4797400000 |
| sp P27797 CALR   | sp P27797 | 1 | 20 | 20 | 20 | 62  | 48.141 | 2.5326E+10 | 3.2581E+10 | 2.6038E+10 | 32974000000 | 32151000000 | 3.5043E+10 |
| sp P27816 MAP4   | sp P27816 | 1 | 45 | 45 | 45 | 51  | 121    | 1.2051E+10 | 1.3078E+10 | 1.1969E+10 | 11195000000 | 11388000000 | 1.0969E+10 |
| sp P27824 CANX   | sp P27824 | 1 | 25 | 25 | 25 | 38  | 67.567 | 1.466E+10  | 1.6177E+10 | 1.5733E+10 | 19536000000 | 17429000000 | 1.7529E+10 |
| sp P28062 PSMB8  | sp P28062 | 1 | 3  | 3  | 3  | 15  | 30.354 | 0          | 253320000  | 0          | 0           | 0           | 123340000  |
| sp P28066 PSMA5  | sp P28066 | 1 | 12 | 12 | 12 | 61  | 26.411 | 5458700000 | 5598000000 | 5372200000 | 5515500000  | 6577000000  | 5498700000 |
| sp P28070 PSMB4  | sp P28070 | 1 | 7  | 7  | 7  | 46  | 29.204 | 1930600000 | 3022900000 | 2234300000 | 2302600000  | 2509600000  | 2420900000 |
| sp P28072 PSMB6  | sp P28072 | 1 | 6  | 6  | 6  | 41  | 25.357 | 1826200000 | 2770400000 | 2811300000 | 1898100000  | 1912800000  | 2410400000 |
| sp P28074 PSMB5  | sp P28074 | 1 | 11 | 11 | 11 | 49  | 28.48  | 4098100000 | 4557100000 | 3763100000 | 4333300000  | 3886400000  | 2959300000 |
| sp P28288 ABCD3  | sp P28288 | 1 | 7  | 7  | 7  | 15  | 75.475 | 533080000  | 624700000  | 546810000  | 752290000   | 591150000   | 639250000  |
| sp P28290 SSFA2  | sp P28290 | 1 | 6  | 6  | 6  | 9.4 | 138.38 | 0          | 116180000  | 135270000  | 0           | 114350000   | 108570000  |
| sp P28300 LOX    | sp P28300 | 1 | 1  | 1  | 1  | 3.4 | 46.944 | 0          | 0          | 0          | 19930000    | 0           | 0          |
| sp P28337 NDUFS1 | sp P28337 | 1 | 12 | 12 | 12 | 27  | 79.467 | 792790000  | 866770000  | 819540000  | 822720000   | 924840000   | 562700000  |
| sp P28340 POLD1  | sp P28340 | 1 | 15 | 15 | 15 | 19  | 123.63 | 656620000  | 783010000  | 652630000  | 755130000   | 737210000   | 603630000  |
| sp P28347 TEAD1  | sp P28347 | 4 | 2  | 2  | 2  | 8.5 | 47.945 | 59934000   | 0          | 0          | 0           | 0           | 0          |
| sp P28482 MAPK1  | sp P28482 | 1 | 13 | 13 | 10 | 51  | 41.389 | 1281400000 | 1483600000 | 1504700000 | 1427300000  | 1566700000  | 1686300000 |
| sp P28838 LAP3   | sp P28838 | 1 | 16 | 16 | 16 | 42  | 56.166 | 1488000000 | 1781600000 | 1696300000 | 1664000000  | 1487100000  | 1774200000 |
| sp P29083 GTF2E1 | sp P29083 | 1 | 2  | 2  | 2  | 6.2 | 49.452 | 0          | 0          | 0          | 0           | 0           | 44483000   |
| sp P29084 GTF2E2 | sp P29084 | 1 | 2  | 2  | 2  | 12  | 33.043 | 0          | 0          | 0          | 0           | 0           | 40592000   |
| sp P29144 TPP2   | sp P29144 | 1 | 27 | 27 | 27 | 29  | 138.35 | 1689000000 | 1817100000 | 1825800000 | 1486300000  | 1674600000  | 1632500000 |
| sp P29218 IMPA1  | sp P29218 | 1 | 4  | 4  | 4  | 22  | 30.188 | 241510000  | 184950000  | 0          | 0           | 162610000   | 0          |
| sp P29317 EPHA2  | sp P29317 | 6 | 14 | 14 | 13 | 18  | 108.27 | 482990000  | 502130000  | 587030000  | 694480000   | 878120000   | 987060000  |
| sp P29353 SHC1   | sp P29353 | 1 | 6  | 6  | 6  | 18  | 62.821 | 359820000  | 397000000  | 394730000  | 428260000   | 342880000   | 387640000  |
| sp P29372 MPG    | sp P29372 | 1 | 3  | 3  | 3  | 15  | 32.868 | 111970000  | 107990000  | 0          | 141180000   | 129440000   | 123350000  |
| sp P29407 TKT    | sp P29407 | 1 | 32 | 32 | 32 | 68  | 67.877 | 9.6761E+10 | 9.7446E+10 | 8.503E+10  | 89271000000 | 83991000000 | 8.1966E+10 |
| sp P29558 RBMS1  | sp P29558 | 2 | 2  | 2  | 2  | 7.4 | 44.505 | 394330000  | 343280000  | 0          | 0           | 371960000   | 312570000  |
| sp P29590 PML    | sp P29590 | 1 | 3  | 3  | 3  | 4.4 | 97.55  | 0          | 0          | 0          | 0           | 91296000    | 121410000  |
| sp P29692 EEF1D  | sp P29692 | 1 | 16 | 16 | 14 | 64  | 31.121 | 1.9585E+10 | 1.712E+10  | 1.9745E+10 | 17649000000 | 19624000000 | 1.9711E+10 |
| sp P29966 MARCKS | sp P29966 | 1 | 8  | 8  | 8  | 48  | 31.554 | 5235600000 | 6870300000 | 4384700000 | 4825800000  | 5646800000  | 5241800000 |

|                   |           |   |    |    |    |     |        |            |            |            |             |             |            |
|-------------------|-----------|---|----|----|----|-----|--------|------------|------------|------------|-------------|-------------|------------|
| sp P29992 GNA11   | sp P29992 | 2 | 5  | 5  | 3  | 19  | 42.123 | 53805000   | 175100000  | 139720000  | 230000000   | 98492000    | 127780000  |
| sp P30040 ERP29   | sp P30040 | 1 | 10 | 10 | 10 | 46  | 28.993 | 3363500000 | 3673600000 | 3626600000 | 3401600000  | 3879900000  | 3698100000 |
| sp P30041 PRDX6   | sp P30041 | 1 | 17 | 17 | 17 | 70  | 25.035 | 2.1177E+10 | 2.392E+10  | 2.5211E+10 | 22676000000 | 21406000000 | 2.1297E+10 |
| sp P30043 BLVRB   | sp P30043 | 1 | 8  | 8  | 8  | 56  | 22.119 | 1384700000 | 1252100000 | 1244400000 | 1270500000  | 1258200000  | 1334800000 |
| sp P30044 PRDX5   | sp P30044 | 1 | 9  | 9  | 9  | 56  | 22.086 | 9054900000 | 8653900000 | 7764600000 | 9742500000  | 10429000000 | 7473500000 |
| sp P30046 DDT     | sp P30046 | 2 | 6  | 6  | 6  | 53  | 12.712 | 2209900000 | 1860500000 | 2304100000 | 1817000000  | 1606900000  | 1722500000 |
| sp P30048 PRDX3   | sp P30048 | 1 | 8  | 8  | 8  | 39  | 27.692 | 4539800000 | 8453400000 | 6665400000 | 6628700000  | 7453900000  | 6553500000 |
| sp P30049 ATP5F1D | sp P30049 | 1 | 2  | 2  | 2  | 14  | 17.49  | 0          | 1495300000 | 0          | 1158000000  | 1193400000  | 1429300000 |
| sp P30050 RPL12   | sp P30050 | 1 | 7  | 7  | 7  | 59  | 17.818 | 1.456E+10  | 1.3344E+10 | 1.3637E+10 | 14695000000 | 13435000000 | 1.4961E+10 |
| sp P30084 ECHS1   | sp P30084 | 1 | 11 | 11 | 11 | 52  | 31.387 | 2868200000 | 2505800000 | 2521400000 | 3881700000  | 3892400000  | 3086100000 |
| sp P30085 CMPK1   | sp P30085 | 1 | 9  | 9  | 9  | 54  | 22.222 | 2329900000 | 2883800000 | 2984400000 | 2598600000  | 2675200000  | 2637000000 |
| sp P30086 PEBP1   | sp P30086 | 1 | 9  | 9  | 9  | 73  | 21.057 | 1.1245E+10 | 1.2426E+10 | 1.0237E+10 | 8247400000  | 10116000000 | 1.0012E+10 |
| sp P30101 PDIA3   | sp P30101 | 1 | 30 | 30 | 30 | 63  | 56.782 | 2.6141E+10 | 2.9172E+10 | 2.7947E+10 | 28750000000 | 26812000000 | 2.9498E+10 |
| sp P30153 PPP2R1A | sp P30153 | 1 | 24 | 24 | 19 | 50  | 65.308 | 8456000000 | 9134700000 | 8961700000 | 8624800000  | 9303800000  | 7190300000 |
| sp P30154 PPP2R1B | sp P30154 | 1 | 8  | 3  | 3  | 19  | 66.213 | 0          | 0          | 0          | 0           | 123580000   | 0          |
| sp P30260 CDC27   | sp P30260 | 1 | 5  | 5  | 5  | 6.6 | 91.866 | 136680000  | 140200000  | 0          | 150800000   | 157570000   | 0          |
| sp P30405 PPIF    | sp P30405 | 1 | 4  | 3  | 3  | 34  | 22.04  | 0          | 0          | 0          | 246930000   | 0           | 0          |
| sp P30408 TM4SF1  | sp P30408 | 1 | 1  | 1  | 1  | 4.5 | 21.632 | 1176400000 | 1489600000 | 1264200000 | 1482200000  | 1376100000  | 1577900000 |
| sp P30419 NMT1    | sp P30419 | 2 | 11 | 11 | 11 | 29  | 56.806 | 2277200000 | 1942200000 | 1932200000 | 2012700000  | 2143600000  | 1740200000 |
| sp P30453 HLA-A   | sp P30453 | 5 | 11 | 1  | 0  | 34  | 41.054 | 0          | 0          | 0          | 0           | 0           | 683020000  |
| sp P30685 HLA-B   | sp P30685 | 6 | 11 | 3  | 0  | 40  | 40.455 | 321700000  | 312990000  | 332290000  | 374040000   | 376840000   | 423920000  |
| sp P30519 HMOX2   | sp P30519 | 1 | 6  | 6  | 6  | 29  | 36.032 | 486800000  | 553280000  | 520010000  | 590710000   | 450830000   | 704030000  |
| sp P30520 ADSS    | sp P30520 | 1 | 12 | 12 | 12 | 34  | 50.097 | 2049500000 | 2254900000 | 2140800000 | 2290700000  | 2651800000  | 2264300000 |
| sp P30530 AXL     | sp P30530 | 2 | 6  | 6  | 6  | 9.4 | 98.336 | 151880000  | 183750000  | 126170000  | 119060000   | 121610000   | 102110000  |
| sp P30533 LRPAP1  | sp P30533 | 1 | 7  | 7  | 7  | 21  | 41.465 | 590710000  | 462830000  | 378510000  | 585160000   | 502100000   | 427300000  |
| sp P30536 TSPO    | sp P30536 | 1 | 2  | 2  | 2  | 9.5 | 18.828 | 600170000  | 270870000  | 528440000  | 0           | 0           | 781520000  |
| sp P30566 ADSL    | sp P30566 | 1 | 14 | 14 | 14 | 41  | 54.889 | 2063400000 | 2620600000 | 1770300000 | 1656200000  | 1768300000  | 1539100000 |
| sp P30622 CLIP1   | sp P30622 | 2 | 7  | 7  | 7  | 6.5 | 162.24 | 277960000  | 353570000  | 286880000  | 298440000   | 309880000   | 219850000  |
| sp P30626 SRI     | sp P30626 | 1 | 10 | 10 | 10 | 56  | 21.676 | 2294000000 | 2750300000 | 2323000000 | 2072500000  | 2317500000  | 2246000000 |
| sp P30740 SERPINB | sp P30740 | 1 | 4  | 4  | 4  | 13  | 42.741 | 398450000  | 351700000  | 307830000  | 362070000   | 364810000   | 429850000  |
| sp P30825 SLC7A1  | sp P30825 | 1 | 1  | 1  | 1  | 1.7 | 67.638 | 0          | 0          | 0          | 29223000    | 0           | 0          |
| sp P30837 ALDH1B1 | sp P30837 | 3 | 18 | 18 | 17 | 36  | 57.206 | 3404800000 | 4748300000 | 5273900000 | 3718500000  | 3864500000  | 4226800000 |
| sp P30838 ALDH3A1 | sp P30838 | 3 | 9  | 8  | 8  | 28  | 50.394 | 718190000  | 1045200000 | 878280000  | 842840000   | 693160000   | 723540000  |
| sp P30876 POLR2B  | sp P30876 | 1 | 16 | 16 | 16 | 17  | 133.9  | 1046000000 | 1263300000 | 1179900000 | 880550000   | 997430000   | 1110500000 |
| sp P31040 SDHA    | sp P31040 | 1 | 26 | 26 | 26 | 62  | 72.691 | 9300300000 | 9750000000 | 8187300000 | 7201100000  | 7469600000  | 7709200000 |
| sp P31150 GDI1    | sp P31150 | 1 | 16 | 9  | 9  | 53  | 50.582 | 1628700000 | 1146800000 | 2148600000 | 1516600000  | 1627900000  | 1443300000 |
| sp P31153 MAT2A   | sp P31153 | 2 | 13 | 13 | 13 | 42  | 43.66  | 4172400000 | 4267700000 | 4829800000 | 4357700000  | 4701500000  | 4257700000 |
| sp P31327 CPS1    | sp P31327 | 1 | 75 | 75 | 72 | 62  | 164.94 | 2.323E+10  | 2.3329E+10 | 2.4291E+10 | 27560000000 | 28677000000 | 2.7602E+10 |
| sp P31350 RRM2    | sp P31350 | 2 | 11 | 11 | 11 | 38  | 44.877 | 1233600000 | 1133200000 | 1269000000 | 1027100000  | 977870000   | 883650000  |

|                   |           |   |    |    |    |     |        |            |            |            |             |             |            |
|-------------------|-----------|---|----|----|----|-----|--------|------------|------------|------------|-------------|-------------|------------|
| sp P31689 DNAJA1  | sp P31689 | 1 | 16 | 16 | 16 | 53  | 44.868 | 7693900000 | 7108400000 | 5948000000 | 6392900000  | 6525600000  | 5663800000 |
| sp P31757 AKT2    | sp P31757 | 1 | 3  | 3  | 2  | 12  | 55.768 | 105060000  | 148490000  | 110080000  | 128440000   | 153140000   | 140340000  |
| sp P31930 UQCRC1  | sp P31930 | 1 | 16 | 15 | 15 | 47  | 52.645 | 5590900000 | 5391900000 | 4869700000 | 5689400000  | 5369700000  | 6132900000 |
| sp P31937 HIBADH  | sp P31937 | 1 | 9  | 9  | 9  | 44  | 35.329 | 622780000  | 702600000  | 602870000  | 737360000   | 855220000   | 814440000  |
| sp P31939 ATIC    | sp P31939 | 1 | 35 | 35 | 35 | 75  | 64.615 | 1.2312E+10 | 1.3453E+10 | 1.2004E+10 | 11875000000 | 12679000000 | 1.1598E+10 |
| sp P31942 HNRNPH  | sp P31942 | 1 | 14 | 13 | 13 | 62  | 36.926 | 4355500000 | 3550000000 | 3046300000 | 4211900000  | 4308400000  | 4655200000 |
| sp P31943 HNRNPH  | sp P31943 | 1 | 17 | 17 | 11 | 52  | 49.229 | 1.7908E+10 | 1.9162E+10 | 2.21E+10   | 19602000000 | 18255000000 | 1.8328E+10 |
| sp P31946 YWHAB   | sp P31946 | 1 | 13 | 9  | 8  | 63  | 28.082 | 1.2066E+10 | 1.316E+10  | 1.3382E+10 | 16013000000 | 14372000000 | 1.4852E+10 |
| sp P31947 SFN     | sp P31947 | 1 | 14 | 12 | 12 | 62  | 27.774 | 7737500000 | 7021900000 | 7544200000 | 8696800000  | 9164800000  | 7176200000 |
| sp P31948 STIP1   | sp P31948 | 1 | 36 | 36 | 36 | 57  | 62.639 | 1.9674E+10 | 2.1592E+10 | 1.7952E+10 | 18378000000 | 20832000000 | 2.1608E+10 |
| sp P31949 S100A11 | sp P31949 | 1 | 6  | 6  | 6  | 53  | 11.74  | 6568300000 | 9095800000 | 7862800000 | 8400600000  | 9049200000  | 7293700000 |
| sp P32004 L1CAM   | sp P32004 | 1 | 23 | 23 | 23 | 25  | 140    | 2798000000 | 2662300000 | 2704400000 | 2280500000  | 2238300000  | 2267000000 |
| sp P32119 PRDX2   | sp P32119 | 1 | 10 | 9  | 9  | 54  | 21.892 | 1.0952E+10 | 1.3792E+10 | 1.1702E+10 | 12239000000 | 12061000000 | 9817100000 |
| sp P32320 CDA     | sp P32320 | 1 | 4  | 4  | 4  | 55  | 16.185 | 2025100000 | 1815700000 | 1581600000 | 1729300000  | 2142000000  | 1657700000 |
| sp P32327 DCTD    | sp P32327 | 1 | 1  | 1  | 1  | 10  | 20.016 | 0          | 0          | 0          | 0           | 0           | 32887000   |
| sp P32322 PYCR1   | sp P32322 | 1 | 10 | 10 | 9  | 47  | 33.36  | 1088800000 | 1077200000 | 864590000  | 1043100000  | 979060000   | 1076400000 |
| sp P32455 GBP1    | sp P32455 | 2 | 6  | 6  | 4  | 15  | 67.93  | 424680000  | 799960000  | 674050000  | 692160000   | 603040000   | 690190000  |
| sp P32456 GBP2    | sp P32456 | 1 | 5  | 3  | 3  | 9.3 | 67.208 | 0          | 0          | 0          | 0           | 0           | 118300000  |
| sp P32780 GTF2H1  | sp P32780 | 1 | 3  | 3  | 3  | 6.6 | 62.031 | 0          | 45830000   | 0          | 0           | 0           | 0          |
| sp P32969 RPL9    | sp P32969 | 1 | 9  | 9  | 9  | 54  | 21.863 | 6440800000 | 6269300000 | 6688500000 | 7805500000  | 7610500000  | 6355100000 |
| sp P32970 CD70    | sp P32970 | 1 | 5  | 5  | 5  | 33  | 21.118 | 172710000  | 245930000  | 178180000  | 150030000   | 136300000   | 141080000  |
| sp P33127 ACSL1   | sp P33127 | 1 | 4  | 4  | 4  | 7.2 | 77.942 | 0          | 121140000  | 114510000  | 103850000   | 0           | 96063000   |
| sp P33176 KIF5B   | sp P33176 | 3 | 35 | 35 | 35 | 49  | 109.68 | 4457300000 | 4629200000 | 4187300000 | 3934900000  | 4202900000  | 4440300000 |
| sp P33240 CSTF2   | sp P33240 | 1 | 9  | 9  | 4  | 26  | 60.959 | 742850000  | 825870000  | 819340000  | 814740000   | 805140000   | 721180000  |
| sp P33316 DUT     | sp P33316 | 1 | 10 | 10 | 10 | 50  | 26.563 | 7316300000 | 6833800000 | 6959900000 | 7129600000  | 7208400000  | 7377400000 |
| sp P33527 ABCC1   | sp P33527 | 1 | 15 | 15 | 15 | 15  | 171.59 | 704060000  | 801200000  | 648780000  | 705400000   | 843420000   | 788840000  |
| sp P33552 CKS2    | sp P33552 | 1 | 2  | 2  | 2  | 24  | 9.8602 | 270170000  | 253550000  | 199470000  | 213550000   | 192920000   | 256500000  |
| sp P33897 ABCD1   | sp P33897 | 2 | 7  | 7  | 7  | 12  | 82.936 | 427440000  | 367800000  | 457130000  | 363260000   | 494510000   | 648890000  |
| sp P33997 MCM4    | sp P33997 | 2 | 29 | 29 | 29 | 41  | 96.557 | 4334600000 | 4523400000 | 3610500000 | 3764500000  | 3554700000  | 3990400000 |
| sp P33992 MCM5    | sp P33992 | 1 | 30 | 30 | 30 | 47  | 82.285 | 4560000000 | 4698400000 | 4682300000 | 4510400000  | 5032100000  | 4790600000 |
| sp P33993 MCM7    | sp P33993 | 1 | 26 | 26 | 26 | 44  | 81.307 | 4385800000 | 3938600000 | 4167500000 | 4456200000  | 3874100000  | 4291200000 |
| sp P34059 GALNS   | sp P34059 | 1 | 1  | 1  | 1  | 3.1 | 58.025 | 0          | 0          | 0          | 0           | 37342000    | 0          |
| sp P34741 SDC2    | sp P34741 | 1 | 1  | 1  | 1  | 7.5 | 22.16  | 0          | 0          | 0          | 0           | 0           | 0          |
| sp P34896 SHMT1   | sp P34896 | 1 | 10 | 9  | 9  | 32  | 53.082 | 643420000  | 656850000  | 673030000  | 458770000   | 394880000   | 427730000  |
| sp P34897 SHMT2   | sp P34897 | 1 | 18 | 18 | 17 | 52  | 55.992 | 5251400000 | 5798600000 | 5355900000 | 6165300000  | 6020500000  | 5919800000 |
| sp P34932 HSPA4   | sp P34932 | 1 | 45 | 45 | 43 | 70  | 94.33  | 1.8235E+10 | 1.8071E+10 | 1.7959E+10 | 19023000000 | 18844000000 | 1.7239E+10 |
| sp P43250 GRK6    | sp P43250 | 2 | 1  | 1  | 1  | 2.4 | 65.99  | 0          | 0          | 0          | 0           | 8441900     | 0          |
| sp P34949 MPI     | sp P34949 | 1 | 3  | 3  | 3  | 13  | 46.655 | 0          | 0          | 0          | 0           | 123540000   | 86550000   |
| sp P35052 GPC1    | sp P35052 | 1 | 4  | 4  | 4  | 12  | 61.68  | 0          | 0          | 0          | 158330000   | 214170000   | 233670000  |

|                   |           |   |    |     |    |     |        |            |            |            |             |             |            |
|-------------------|-----------|---|----|-----|----|-----|--------|------------|------------|------------|-------------|-------------|------------|
| sp P35080 PFN2    | sp P35080 | 1 | 4  | 4   | 4  | 49  | 15.046 | 873750000  | 0          | 802060000  | 805070000   | 984340000   | 0          |
| sp P35222 CTNNA1  | sp P35222 | 2 | 40 | 40  | 32 | 62  | 100.07 | 6008200000 | 5903600000 | 6838900000 | 4986800000  | 5034500000  | 5192900000 |
| sp P35222 CTNNB1  | sp P35222 | 1 | 20 | 15  | 15 | 36  | 85.496 | 889560000  | 1151600000 | 940790000  | 933400000   | 866630000   | 934490000  |
| sp P35232 PHB     | sp P35232 | 1 | 15 | 15  | 15 | 56  | 29.804 | 6435300000 | 6722000000 | 6122100000 | 7303400000  | 8558000000  | 7705700000 |
| sp P35237 SERPINB | sp P35237 | 1 | 12 | 12  | 11 | 43  | 42.621 | 3177100000 | 2467100000 | 3734800000 | 3483300000  | 3579900000  | 3216000000 |
| sp P35241 RDX     | sp P35241 | 1 | 31 | 15  | 15 | 46  | 68.563 | 3266200000 | 3500200000 | 3952200000 | 3251800000  | 3108200000  | 2667900000 |
| sp P35244 RPA3    | sp P35244 | 1 | 5  | 5   | 5  | 52  | 13.569 | 1007400000 | 1031400000 | 1160300000 | 1015300000  | 1242000000  | 849620000  |
| sp P35249 RFC4    | sp P35249 | 1 | 8  | 8   | 8  | 32  | 39.681 | 865280000  | 1026600000 | 1166400000 | 988400000   | 806830000   | 756930000  |
| sp P35250 RFC2    | sp P35250 | 1 | 8  | 8   | 8  | 29  | 39.157 | 945220000  | 1242200000 | 829950000  | 1107500000  | 941290000   | 941060000  |
| sp P35251 RFC1    | sp P35251 | 1 | 10 | 10  | 10 | 11  | 128.25 | 308740000  | 361310000  | 332380000  | 360150000   | 254410000   | 274880000  |
| sp P35268 RPL22   | sp P35268 | 1 | 5  | 5   | 5  | 52  | 14.787 | 5506600000 | 4925700000 | 1.0927E+10 | 5665900000  | 4719700000  | 6728700000 |
| sp P35269 GTF2F1  | sp P35269 | 1 | 7  | 7   | 7  | 22  | 58.24  | 571070000  | 622350000  | 530030000  | 525360000   | 398790000   | 492140000  |
| sp P35270 SPR     | sp P35270 | 1 | 5  | 5   | 5  | 28  | 28.048 | 369550000  | 413730000  | 388430000  | 693430000   | 474950000   | 470020000  |
| sp P35555 FBN1    | sp P35555 | 1 | 2  | 2   | 2  | 0.8 | 312.24 | 0          | 0          | 0          | 0           | 0           | 19334000   |
| sp P35573 AGL     | sp P35573 | 1 | 12 | 12  | 12 | 11  | 174.76 | 522930000  | 604360000  | 499730000  | 516800000   | 571320000   | 553680000  |
| sp P35579 MYH9    | sp P35579 | 9 | ## | 122 | ## | 59  | 226.53 | 1.003E+11  | 1.039E+11  | 1.0154E+11 | 1.0216E+11  | 1.0782E+11  | 1.0594E+11 |
| sp P35580 MYH10   | sp P35580 | 1 | 40 | 24  | 22 | 26  | 229    | 803630000  | 881050000  | 982830000  | 908130000   | 988580000   | 1050500000 |
| sp P35606 COPB2   | sp P35606 | 1 | 26 | 26  | 26 | 41  | 102.49 | 5245600000 | 4250600000 | 4614300000 | 4076700000  | 4527600000  | 4719900000 |
| sp P35610 SOAT1   | sp P35610 | 1 | 4  | 4   | 4  | 11  | 64.734 | 96484000   | 167800000  | 112490000  | 129990000   | 56347000    | 0          |
| sp P35611 ADD1    | sp P35611 | 1 | 5  | 5   | 5  | 11  | 80.954 | 230590000  | 241480000  | 234910000  | 157280000   | 163970000   | 195960000  |
| sp P35613 BSG     | sp P35613 | 1 | 10 | 10  | 10 | 34  | 42.2   | 6654800000 | 6762400000 | 7923400000 | 7646900000  | 9330000000  | 7418500000 |
| sp P35637 FUS     | sp P35637 | 1 | 9  | 9   | 7  | 22  | 53.425 | 7755500000 | 7504800000 | 8664600000 | 8805700000  | 8301800000  | 9665900000 |
| sp P35658 NUP214  | sp P35658 | 1 | 26 | 26  | 26 | 19  | 213.62 | 1580300000 | 1454300000 | 1910200000 | 1638800000  | 1487700000  | 1643500000 |
| sp P35659 DEK     | sp P35659 | 1 | 10 | 10  | 10 | 33  | 42.674 | 1972000000 | 2295600000 | 1685300000 | 1842800000  | 2090400000  | 1988000000 |
| sp P35754 GLRX    | sp P35754 | 1 | 4  | 4   | 4  | 39  | 11.776 | 548640000  | 485930000  | 482320000  | 517710000   | 529130000   | 411210000  |
| sp P35914 HMGCL   | sp P35914 | 1 | 2  | 2   | 2  | 8   | 34.36  | 0          | 0          | 0          | 123330000   | 0           | 0          |
| sp P35998 PSMC2   | sp P35998 | 1 | 24 | 24  | 24 | 61  | 48.633 | 4323400000 | 5083800000 | 4124200000 | 4484700000  | 4680500000  | 4268600000 |
| sp P36404 ARL2    | sp P36404 | 1 | 5  | 5   | 5  | 33  | 20.878 | 0          | 180290000  | 178470000  | 181890000   | 230790000   | 0          |
| sp P36405 ARL3    | sp P36405 | 1 | 8  | 8   | 8  | 54  | 20.455 | 750420000  | 877900000  | 681910000  | 847960000   | 697560000   | 607890000  |
| sp P36507 MAP2K2  | sp P36507 | 1 | 9  | 9   | 7  | 35  | 44.424 | 706870000  | 993950000  | 926750000  | 980190000   | 1128100000  | 932000000  |
| sp P36542 ATP5F1C | sp P36542 | 1 | 10 | 10  | 10 | 35  | 32.996 | 3686400000 | 3845200000 | 3964200000 | 4343300000  | 4108700000  | 5060200000 |
| sp P36543 ATP6V1E | sp P36543 | 1 | 3  | 3   | 3  | 16  | 26.145 | 218490000  | 219430000  | 200350000  | 264580000   | 190660000   | 235240000  |
| sp P36551 CPOX    | sp P36551 | 1 | 4  | 4   | 4  | 12  | 50.151 | 0          | 91882000   | 0          | 0           | 0           | 0          |
| sp P36578 RPL4    | sp P36578 | 1 | 19 | 19  | 19 | 48  | 47.697 | 2.0592E+10 | 2.4728E+10 | 1.7535E+10 | 21475000000 | 25192000000 | 2.0536E+10 |
| sp P36639 NUDT1   | sp P36639 | 1 | 3  | 3   | 3  | 20  | 22.519 | 394280000  | 504760000  | 441860000  | 414180000   | 598700000   | 244750000  |
| sp P36776 LONP1   | sp P36776 | 1 | 22 | 22  | 22 | 35  | 106.49 | 2367700000 | 2454800000 | 2603200000 | 3649200000  | 2845500000  | 3066900000 |
| sp P36871 PGM1    | sp P36871 | 1 | 24 | 24  | 24 | 56  | 61.448 | 3015100000 | 3961400000 | 3457000000 | 3493000000  | 3712500000  | 3096700000 |
| sp P36873 PPP1CC  | sp P36873 | 1 | 12 | 1   | 1  | 43  | 36.983 | 0          | 0          | 0          | 0           | 0           | 71956000   |
| sp P36915 GNL1    | sp P36915 | 1 | 1  | 1   | 1  | 3   | 68.66  | 0          | 0          | 0          | 0           | 0           | 41757000   |

|                    |           |   |    |    |    |     |        |            |            |            |             |             |            |
|--------------------|-----------|---|----|----|----|-----|--------|------------|------------|------------|-------------|-------------|------------|
| sp P36952 SERPINB1 | sp P36952 | 1 | 21 | 21 | 21 | 73  | 42.1   | 1.1497E+10 | 1.1558E+10 | 1.268E+10  | 10881000000 | 10960000000 | 1.0513E+10 |
| sp P36954 POLR2I   | sp P36954 | 1 | 3  | 3  | 3  | 42  | 14.523 | 160080000  | 134320000  | 137530000  | 135500000   | 167390000   | 130740000  |
| sp P36957 DLST     | sp P36957 | 1 | 12 | 12 | 12 | 37  | 48.755 | 1949900000 | 2127900000 | 2337100000 | 2538100000  | 2583500000  | 2563900000 |
| sp P36969 GPX4     | sp P36969 | 1 | 2  | 2  | 2  | 13  | 22.174 | 0          | 156920000  | 0          | 0           | 0           | 0          |
| sp P37108 SRP14    | sp P37108 | 1 | 7  | 7  | 7  | 60  | 14.57  | 5835400000 | 6010200000 | 6936800000 | 5093300000  | 5823100000  | 4510100000 |
| sp P37198 NUP62    | sp P37198 | 1 | 8  | 8  | 8  | 22  | 53.254 | 982760000  | 1107100000 | 902090000  | 944780000   | 1071000000  | 1112000000 |
| sp P37235 HPCAL1   | sp P37235 | 3 | 11 | 11 | 11 | 60  | 22.313 | 1333500000 | 1613200000 | 1084200000 | 1084600000  | 1449800000  | 1050700000 |
| sp P37268 FDFT1    | sp P37268 | 1 | 7  | 7  | 7  | 22  | 48.115 | 382450000  | 502350000  | 443970000  | 0           | 154600000   | 158940000  |
| sp P37802 TAGLN2   | sp P37802 | 1 | 16 | 16 | 15 | 88  | 22.391 | 3.0385E+10 | 3.7217E+10 | 3.1584E+10 | 34085000000 | 34597000000 | 2.9097E+10 |
| sp P37837 TALDO1   | sp P37837 | 1 | 17 | 17 | 17 | 43  | 37.54  | 5578600000 | 6413200000 | 6192700000 | 6075600000  | 5512500000  | 5490600000 |
| sp P37840 SNCA     | sp P37840 | 1 | 3  | 3  | 3  | 35  | 14.46  | 348980000  | 286310000  | 266130000  | 378920000   | 429270000   | 349040000  |
| sp P38117 ETFB     | sp P38117 | 1 | 14 | 14 | 14 | 50  | 27.843 | 2971300000 | 3011800000 | 2852300000 | 3465800000  | 3389000000  | 3541800000 |
| sp P38159 RBMX     | sp P38159 | 5 | 17 | 17 | 17 | 42  | 42.331 | 9141500000 | 1.0505E+10 | 8864600000 | 9039400000  | 8529400000  | 9349700000 |
| sp P38432 COIL     | sp P38432 | 1 | 3  | 3  | 3  | 8.9 | 62.608 | 52126000   | 0          | 0          | 68197000    | 59157000    | 0          |
| sp P38606 ATP6V1A  | sp P38606 | 1 | 17 | 17 | 17 | 33  | 68.303 | 2382600000 | 2593500000 | 2800100000 | 2051500000  | 2323200000  | 2598800000 |
| sp P38646 HSPA9    | sp P38646 | 1 | 37 | 37 | 36 | 61  | 73.68  | 3.2234E+10 | 3.6835E+10 | 3.3076E+10 | 39351000000 | 40436000000 | 4.0177E+10 |
| sp P38919 EIF4A3   | sp P38919 | 1 | 23 | 19 | 19 | 62  | 46.871 | 4947900000 | 5467500000 | 5669400000 | 5817300000  | 6598600000  | 6135700000 |
| sp P39019 RPS19    | sp P39019 | 1 | 11 | 11 | 11 | 57  | 16.06  | 1.311E+10  | 1.0123E+10 | 1.171E+10  | 10892000000 | 12082000000 | 1.1752E+10 |
| sp P39023 RPL3     | sp P39023 | 2 | 22 | 22 | 22 | 46  | 46.108 | 1.9327E+10 | 1.8337E+10 | 1.9044E+10 | 19011000000 | 20144000000 | 1.9125E+10 |
| sp P39656 DDOST    | sp P39656 | 1 | 12 | 12 | 12 | 44  | 50.8   | 1537800000 | 1430400000 | 1863100000 | 1900100000  | 1511300000  | 1473000000 |
| sp P39687 ANP32A   | sp P39687 | 3 | 11 | 11 | 9  | 40  | 28.585 | 6955400000 | 7894200000 | 5909800000 | 6105300000  | 6784300000  | 5940200000 |
| sp P39748 FEN1     | sp P39748 | 3 | 12 | 12 | 12 | 43  | 42.592 | 4777200000 | 5371800000 | 4856000000 | 4580500000  | 4173900000  | 4501400000 |
| sp Q13948 CUX1     | sp Q13948 | 2 | 4  | 4  | 4  | 11  | 77.454 | 0          | 69214000   | 82427000   | 0           | 82998000    | 67191000   |
| sp P40127 CAPG     | sp P40127 | 1 | 11 | 11 | 11 | 46  | 38.498 | 3632300000 | 3458200000 | 3973000000 | 3383400000  | 3697500000  | 3484500000 |
| sp P40123 CAP2     | sp P40123 | 1 | 6  | 5  | 5  | 15  | 52.823 | 208730000  | 188910000  | 268310000  | 0           | 239270000   | 206250000  |
| sp P40222 TXLNA    | sp P40222 | 1 | 14 | 14 | 14 | 32  | 61.89  | 897440000  | 773300000  | 1075100000 | 855170000   | 964790000   | 1106200000 |
| sp P40227 CCT6A    | sp P40227 | 2 | 25 | 25 | 25 | 66  | 58.024 | 1.5584E+10 | 1.4941E+10 | 1.4168E+10 | 15014000000 | 16331000000 | 1.5402E+10 |
| sp P40267 NNMT     | sp P40267 | 1 | 8  | 8  | 8  | 42  | 29.574 | 1584900000 | 1736000000 | 1441000000 | 1702000000  | 1661200000  | 1572300000 |
| sp P40424 PBX1     | sp P40424 | 2 | 2  | 2  | 2  | 6.7 | 46.625 | 0          | 98982000   | 0          | 0           | 0           | 0          |
| sp P40429 RPL13A   | sp P40429 | 2 | 8  | 8  | 8  | 38  | 23.577 | 3782600000 | 4068100000 | 3970000000 | 4728100000  | 5327000000  | 3611000000 |
| sp P40616 ARL1     | sp P40616 | 1 | 4  | 4  | 4  | 39  | 20.417 | 333940000  | 421230000  | 319130000  | 417080000   | 445190000   | 509910000  |
| sp P40692 MLH1     | sp P40692 | 1 | 5  | 5  | 5  | 9.7 | 84.6   | 166880000  | 128260000  | 107210000  | 104500000   | 58704000    | 0          |
| sp P40763 STAT3    | sp P40763 | 1 | 21 | 21 | 21 | 39  | 88.067 | 1652300000 | 2100300000 | 1861600000 | 1610600000  | 1704900000  | 1627200000 |
| sp P40818 USP8     | sp P40818 | 1 | 3  | 3  | 3  | 4.7 | 127.52 | 239210000  | 178520000  | 221460000  | 196810000   | 166180000   | 82085000   |
| sp P40855 PEX19    | sp P40855 | 1 | 4  | 4  | 4  | 20  | 32.806 | 120100000  | 0          | 0          | 0           | 100320000   | 0          |
| sp P40925 MDH1     | sp P40925 | 1 | 13 | 13 | 13 | 43  | 36.426 | 8217400000 | 7482300000 | 8161400000 | 7388600000  | 7351500000  | 7751300000 |
| sp P40926 MDH2     | sp P40926 | 1 | 15 | 15 | 15 | 57  | 35.503 | 1.7889E+10 | 1.8918E+10 | 1.7919E+10 | 20218000000 | 23864000000 | 2.1752E+10 |
| sp P40937 RFC5     | sp P40937 | 1 | 6  | 6  | 6  | 19  | 38.496 | 588740000  | 653690000  | 530750000  | 529100000   | 590730000   | 492970000  |
| sp P40938 RFC3     | sp P40938 | 1 | 9  | 9  | 9  | 38  | 40.556 | 1020600000 | 1211200000 | 1028500000 | 1095300000  | 1100400000  | 1052000000 |

|                   |           |   |    |    |    |     |        |            |            |            |             |             |            |
|-------------------|-----------|---|----|----|----|-----|--------|------------|------------|------------|-------------|-------------|------------|
| sp P40939 HADHA   | sp P40939 | 1 | 27 | 27 | 27 | 50  | 82.999 | 5334200000 | 6214500000 | 5942900000 | 6862200000  | 6519300000  | 8052700000 |
| sp P41097 EIF2S3  | sp P41097 | 2 | 24 | 24 | 24 | 60  | 51.109 | 1.0713E+10 | 9638500000 | 1.0668E+10 | 9140800000  | 8940300000  | 1.0319E+10 |
| sp P41208 CETN2   | sp P41208 | 1 | 3  | 3  | 3  | 22  | 19.738 | 0          | 0          | 0          | 0           | 76806000    | 46304000   |
| sp P41214 EIF2D   | sp P41214 | 1 | 5  | 5  | 5  | 14  | 64.706 | 136290000  | 201360000  | 78608000   | 147510000   | 193080000   | 134640000  |
| sp P41221 WNT5A   | sp P41221 | 2 | 3  | 3  | 3  | 13  | 42.339 | 0          | 0          | 41032000   | 0           | 0           | 0          |
| sp P41223 BUD31   | sp P41223 | 1 | 7  | 7  | 7  | 46  | 17     | 414710000  | 393880000  | 414600000  | 454460000   | 481550000   | 338790000  |
| sp P41227 NAA10   | sp P41227 | 2 | 12 | 12 | 12 | 58  | 26.458 | 1581400000 | 1754500000 | 2011500000 | 1810300000  | 2040000000  | 1779700000 |
| sp P41236 PPP1R2  | sp P41236 | 2 | 5  | 5  | 5  | 37  | 23.015 | 0          | 0          | 146560000  | 167560000   | 158150000   | 206940000  |
| sp P41240 CSK     | sp P41240 | 1 | 4  | 4  | 4  | 13  | 50.704 | 77930000   | 0          | 0          | 0           | 114240000   | 114950000  |
| sp P41250 GARS    | sp P41250 | 1 | 25 | 25 | 25 | 40  | 83.165 | 3986700000 | 4256700000 | 4215500000 | 4440200000  | 4467900000  | 5219200000 |
| sp P41252 IARS    | sp P41252 | 1 | 41 | 41 | 41 | 41  | 144.5  | 6448700000 | 6295600000 | 6580700000 | 6930400000  | 6952700000  | 6985500000 |
| sp P41567 EIF1    | sp P41567 | 1 | 6  | 6  | 2  | 65  | 12.732 | 1232900000 | 1425300000 | 1124500000 | 1397600000  | 1691800000  | 1349500000 |
| sp P41743 PRKCI   | sp P41743 | 1 | 6  | 6  | 6  | 18  | 68.262 | 165530000  | 192830000  | 212550000  | 220530000   | 253100000   | 197300000  |
| sp P42025 ACTR1B  | sp P42025 | 1 | 7  | 2  | 2  | 20  | 42.293 | 0          | 0          | 0          | 0           | 0           | 91650000   |
| sp P42126 ECI1    | sp P42126 | 1 | 5  | 5  | 5  | 18  | 32.816 | 818360000  | 924940000  | 675770000  | 778050000   | 1174400000  | 1093000000 |
| sp P42166 TMPO    | sp P42166 | 1 | 20 | 20 | 13 | 43  | 75.491 | 3865200000 | 4229000000 | 3701700000 | 4918200000  | 5240800000  | 5018100000 |
| sp P42167 TMPO    | sp P42167 | 1 | 16 | 9  | 9  | 53  | 50.67  | 1651300000 | 1511300000 | 1279200000 | 1632100000  | 1547700000  | 1541200000 |
| sp P42224 STAT1   | sp P42224 | 1 | 20 | 20 | 20 | 33  | 87.334 | 2158300000 | 2540000000 | 2565800000 | 2270400000  | 2528900000  | 2387300000 |
| sp P42285 MTREX   | sp P42285 | 1 | 20 | 20 | 20 | 25  | 117.8  | 2077000000 | 2580800000 | 2152300000 | 1820900000  | 1984800000  | 1710100000 |
| sp P42330 AKR1C3  | sp P42330 | 1 | 16 | 9  | 9  | 69  | 36.853 | 1.6266E+10 | 1.654E+10  | 1.284E+10  | 12180000000 | 13640000000 | 1.17E+10   |
| sp P42345 MTOR    | sp P42345 | 1 | 16 | 16 | 16 | 8.6 | 288.89 | 1442000000 | 1658700000 | 1456600000 | 1473600000  | 1489400000  | 1527100000 |
| sp P42566 EPS15   | sp P42566 | 1 | 6  | 6  | 6  | 9.7 | 98.655 | 182260000  | 198930000  | 148320000  | 175680000   | 185830000   | 178260000  |
| sp P42574 CASP3   | sp P42574 | 1 | 2  | 2  | 2  | 6.9 | 31.608 | 24200000   | 0          | 0          | 0           | 72886000    | 0          |
| sp P42677 RPS27   | sp P42677 | 1 | 5  | 5  | 2  | 41  | 9.461  | 4662300000 | 6887200000 | 4968500000 | 4570900000  | 5900100000  | 6361700000 |
| sp P42695 NCAPD3  | sp P42695 | 1 | 4  | 4  | 4  | 3.7 | 168.89 | 5069000000 | 5795000000 | 0          | 0           | 0           | 3800400000 |
| sp P42696 RBM34   | sp P42696 | 1 | 3  | 3  | 3  | 7.2 | 48.564 | 0          | 158390000  | 0          | 84398000    | 65822000    | 0          |
| sp P42704 LRPPRC  | sp P42704 | 2 | 60 | 60 | 60 | 52  | 157.9  | 1.1768E+10 | 1.2274E+10 | 1.0502E+10 | 11288000000 | 11163000000 | 1.1589E+10 |
| sp P42765 ACAA2   | sp P42765 | 1 | 17 | 17 | 17 | 62  | 41.924 | 2330200000 | 2217400000 | 2446400000 | 2959000000  | 3611200000  | 3015700000 |
| sp P42766 RPL35   | sp P42766 | 1 | 3  | 3  | 3  | 26  | 14.551 | 4566000000 | 3338400000 | 3251700000 | 3462200000  | 3854300000  | 4110000000 |
| sp P42771 CDKN2A  | sp P42771 | 2 | 5  | 5  | 5  | 55  | 16.532 | 4125000000 | 4041600000 | 3618300000 | 3338700000  | 3563700000  | 2690900000 |
| sp P42773 CDKN2C  | sp P42773 | 1 | 3  | 3  | 3  | 19  | 18.127 | 175890000  | 228610000  | 237960000  | 0           | 178060000   | 0          |
| sp P42785 PRCP    | sp P42785 | 1 | 2  | 2  | 2  | 5.4 | 55.799 | 0          | 0          | 0          | 0           | 96901000    | 0          |
| sp P42858 HTT     | sp P42858 | 1 | 4  | 4  | 4  | 2.1 | 347.6  | 93579000   | 0          | 0          | 0           | 0           | 0          |
| sp P42892 ECE1    | sp P42892 | 1 | 15 | 15 | 15 | 30  | 87.163 | 910360000  | 1106800000 | 1043700000 | 904260000   | 859040000   | 1209000000 |
| sp P43007 SLC1A4  | sp P43007 | 1 | 3  | 3  | 3  | 9.8 | 55.722 | 121720000  | 146170000  | 110950000  | 94821000    | 129850000   | 178960000  |
| sp P43034 PAFAH1B | sp P43034 | 1 | 14 | 14 | 14 | 44  | 46.637 | 2297300000 | 2255700000 | 2424200000 | 2070100000  | 2689700000  | 2809600000 |
| sp P43121 MCAM    | sp P43121 | 1 | 14 | 14 | 14 | 31  | 71.607 | 811750000  | 770420000  | 971700000  | 855130000   | 864660000   | 966400000  |
| sp P43243 MATR3   | sp P43243 | 1 | 31 | 31 | 31 | 45  | 94.622 | 1.4701E+10 | 1.3466E+10 | 1.4839E+10 | 14804000000 | 14912000000 | 1.4087E+10 |
| sp P43246 MSH2    | sp P43246 | 1 | 14 | 14 | 14 | 23  | 104.74 | 880290000  | 825990000  | 796410000  | 986610000   | 991450000   | 1001100000 |



|                   |           |   |    |    |    |     |        |            |            |            |             |             |            |
|-------------------|-----------|---|----|----|----|-----|--------|------------|------------|------------|-------------|-------------|------------|
| sp P43304 GPD2    | sp P43304 | 1 | 21 | 21 | 21 | 37  | 80.852 | 1901400000 | 1670800000 | 1980900000 | 1953300000  | 2057700000  | 2207900000 |
| sp P43307 SSR1    | sp P43307 | 1 | 4  | 4  | 4  | 24  | 32.235 | 728820000  | 725100000  | 815270000  | 842820000   | 875150000   | 762550000  |
| sp P43487 RANBP1  | sp P43487 | 2 | 7  | 7  | 7  | 58  | 23.31  | 4973600000 | 4805700000 | 5547700000 | 5645600000  | 4768800000  | 4641200000 |
| sp P43490 NAMPT   | sp P43490 | 1 | 17 | 17 | 17 | 51  | 55.52  | 1488700000 | 1426700000 | 1406700000 | 1563800000  | 1745400000  | 1303900000 |
| sp P43686 PSMC4   | sp P43686 | 1 | 19 | 19 | 19 | 65  | 47.366 | 2915500000 | 3707300000 | 2858400000 | 2766600000  | 3175300000  | 3050800000 |
| sp P43897 TSFM    | sp P43897 | 1 | 10 | 10 | 10 | 48  | 35.39  | 1201600000 | 1041300000 | 1146000000 | 1301100000  | 1221900000  | 1075600000 |
| sp P45877 PPIC    | sp P45877 | 1 | 3  | 3  | 3  | 15  | 22.763 | 200700000  | 274540000  | 262050000  | 346990000   | 271430000   | 257360000  |
| sp P45880 VDAC2   | sp P45880 | 1 | 14 | 14 | 14 | 64  | 31.566 | 8391400000 | 6646400000 | 7835600000 | 9540600000  | 10031000000 | 1.1213E+10 |
| sp P45973 CBX5    | sp P45973 | 1 | 8  | 8  | 8  | 47  | 22.225 | 1826700000 | 1999200000 | 1890500000 | 1268500000  | 1624800000  | 1706000000 |
| sp P45974 USP5    | sp P45974 | 1 | 22 | 22 | 22 | 38  | 95.785 | 4207600000 | 4557600000 | 3732500000 | 3475500000  | 3707400000  | 4110600000 |
| sp P46013 MKI67   | sp P46013 | 1 | 57 | 57 | 57 | 29  | 358.69 | 2918400000 | 3260600000 | 3153300000 | 2928500000  | 3145200000  | 3512300000 |
| sp P46060 RANGAP1 | sp P46060 | 1 | 21 | 21 | 21 | 44  | 63.541 | 3497900000 | 3546400000 | 3415300000 | 3526600000  | 3832700000  | 3429600000 |
| sp P46063 RECQL   | sp P46063 | 1 | 20 | 20 | 20 | 39  | 73.457 | 3553700000 | 3256900000 | 3474000000 | 3540200000  | 3105100000  | 3375800000 |
| sp P46087 NOP2    | sp P46087 | 1 | 17 | 17 | 17 | 28  | 89.301 | 2571300000 | 2346900000 | 2544200000 | 2997700000  | 2673600000  | 3362000000 |
| sp P46100 ATRX    | sp P46100 | 1 | 3  | 3  | 3  | 1.8 | 282.58 | 108320000  | 92926000   | 93565000   | 0           | 0           | 0          |
| sp P46108 CRK     | sp P46108 | 1 | 8  | 8  | 8  | 37  | 33.83  | 436680000  | 374110000  | 423360000  | 538390000   | 502810000   | 520690000  |
| sp P46109 CRKL    | sp P46109 | 1 | 7  | 7  | 7  | 38  | 33.777 | 951520000  | 849060000  | 742190000  | 849840000   | 888130000   | 860330000  |
| sp P46199 MTIF2   | sp P46199 | 1 | 1  | 1  | 1  | 1.7 | 81.316 | 0          | 0          | 0          | 0           | 60681000    | 0          |
| sp P46379 BAG6    | sp P46379 | 1 | 17 | 17 | 17 | 27  | 119.41 | 920640000  | 1079200000 | 1011700000 | 942290000   | 996000000   | 1022000000 |
| sp P46459 NSF     | sp P46459 | 1 | 20 | 20 | 20 | 30  | 82.593 | 1206700000 | 1111200000 | 1135000000 | 1424000000  | 1590500000  | 1543300000 |
| sp P46734 MAP2K3  | sp P46734 | 2 | 7  | 7  | 7  | 28  | 39.318 | 403120000  | 327340000  | 271930000  | 534700000   | 394250000   | 469880000  |
| sp P46736 BRCC3   | sp P46736 | 1 | 5  | 5  | 5  | 21  | 36.072 | 214930000  | 187210000  | 183900000  | 147740000   | 171040000   | 0          |
| sp P46776 RPL27A  | sp P46776 | 1 | 6  | 6  | 6  | 35  | 16.561 | 6774800000 | 5311300000 | 7822300000 | 7121300000  | 5490700000  | 7130600000 |
| sp P46777 RPL5    | sp P46777 | 1 | 15 | 15 | 15 | 56  | 34.362 | 1.4877E+10 | 1.624E+10  | 1.6219E+10 | 13956000000 | 14243000000 | 1.5687E+10 |
| sp P46778 RPL21   | sp P46778 | 1 | 7  | 7  | 7  | 37  | 18.565 | 5738600000 | 6139800000 | 6651700000 | 6140800000  | 6388400000  | 7606300000 |
| sp P46779 RPL28   | sp P46779 | 1 | 7  | 7  | 7  | 40  | 15.747 | 6903300000 | 7520600000 | 5697500000 | 6079100000  | 6556400000  | 6706100000 |
| sp P46781 RPS9    | sp P46781 | 1 | 15 | 15 | 15 | 58  | 22.591 | 1.1472E+10 | 1.4149E+10 | 1.3301E+10 | 13401000000 | 12870000000 | 1.3461E+10 |
| sp P46782 RPS5    | sp P46782 | 1 | 12 | 12 | 12 | 55  | 22.876 | 1.04E+10   | 1.1518E+10 | 1.1404E+10 | 12428000000 | 12978000000 | 1.2766E+10 |
| sp P46783 RPS10   | sp P46783 | 2 | 8  | 7  | 7  | 44  | 18.898 | 4918400000 | 3454400000 | 4040500000 | 4205600000  | 3641200000  | 3922500000 |
| sp P46821 MAP1B   | sp P46821 | 2 | 60 | 60 | 60 | 38  | 270.63 | 5754400000 | 6180200000 | 5803700000 | 5500500000  | 5713500000  | 5910500000 |
| sp P46926 GNPDA1  | sp P46926 | 1 | 9  | 9  | 6  | 46  | 32.668 | 1172100000 | 1404600000 | 992440000  | 833970000   | 897520000   | 760080000  |
| sp P46934 NEDD4   | sp P46934 | 1 | 2  | 2  | 2  | 2   | 149.11 | 0          | 0          | 0          | 0           | 0           | 49726000   |
| sp P46937 YAP1    | sp P46937 | 1 | 9  | 9  | 9  | 35  | 54.461 | 301330000  | 307960000  | 371170000  | 348620000   | 344610000   | 277230000  |
| sp P46939 UTRN    | sp P46939 | 1 | 5  | 5  | 5  | 2.5 | 394.46 | 0          | 0          | 0          | 0           | 45403000    | 0          |
| sp P46940 IQGAP1  | sp P46940 | 1 | 69 | 69 | 66 | 54  | 189.25 | 4.4635E+10 | 4.2773E+10 | 4.6171E+10 | 43278000000 | 39644000000 | 4.3299E+10 |
| sp P46976 GYG1    | sp P46976 | 1 | 3  | 3  | 3  | 11  | 39.383 | 0          | 245190000  | 0          | 0           | 0           | 0          |
| sp P46977 STT3A   | sp P46977 | 1 | 12 | 12 | 12 | 17  | 80.529 | 1594200000 | 1280100000 | 1583700000 | 1462600000  | 1578700000  | 1698700000 |
| sp P47224 RABIF   | sp P47224 | 1 | 1  | 1  | 1  | 8.9 | 13.839 | 0          | 0          | 0          | 0           | 0           | 66954000   |
| sp P47712 PLA2G4A | sp P47712 | 1 | 17 | 17 | 17 | 30  | 85.238 | 1237500000 | 1537100000 | 1817200000 | 1411500000  | 1486800000  | 1593700000 |

|                   |           |   |    |    |    |     |        |            |            |            |             |             |            |
|-------------------|-----------|---|----|----|----|-----|--------|------------|------------|------------|-------------|-------------|------------|
| sp P47755 CAPZA2  | sp P47755 | 1 | 12 | 10 | 10 | 64  | 32.949 | 2651000000 | 3465000000 | 3960100000 | 2777900000  | 3042500000  | 2675700000 |
| sp P47756 CAPZB   | sp P47756 | 1 | 17 | 17 | 17 | 61  | 31.35  | 6709200000 | 8742100000 | 6837700000 | 7688300000  | 7522200000  | 7818800000 |
| sp P47813 EIF1AX  | sp P47813 | 2 | 4  | 4  | 4  | 42  | 16.46  | 1528400000 | 1870000000 | 2256700000 | 1730900000  | 1630400000  | 1551300000 |
| sp P47897 QARS    | sp P47897 | 1 | 34 | 33 | 33 | 55  | 87.798 | 5251700000 | 5035800000 | 4767200000 | 5206900000  | 5152400000  | 5505000000 |
| sp P47914 RPL29   | sp P47914 | 1 | 2  | 2  | 2  | 15  | 17.752 | 4590900000 | 0          | 2694700000 | 2376300000  | 4949700000  | 6297300000 |
| sp P47985 UQCRFS  | sp P47985 | 2 | 8  | 8  | 8  | 39  | 29.668 | 1221700000 | 1094700000 | 1098200000 | 1102700000  | 1410200000  | 964120000  |
| sp P48047 ATP5O   | sp P48047 | 1 | 9  | 9  | 9  | 58  | 23.277 | 3798300000 | 2922800000 | 2878300000 | 3698400000  | 4001800000  | 3838500000 |
| sp P48059 LIMS1   | sp P48059 | 2 | 9  | 9  | 9  | 35  | 37.251 | 1041200000 | 997060000  | 769020000  | 671220000   | 743380000   | 964170000  |
| sp P48060 GLIPR1  | sp P48060 | 1 | 2  | 2  | 2  | 8.6 | 30.366 | 0          | 0          | 2112200000 | 0           | 0           | 0          |
| sp P48147 PREP    | sp P48147 | 1 | 15 | 15 | 15 | 31  | 80.699 | 975270000  | 944810000  | 857890000  | 790280000   | 819990000   | 815220000  |
| sp P48163 ME1     | sp P48163 | 1 | 14 | 14 | 14 | 34  | 64.149 | 1060500000 | 1132000000 | 907630000  | 1111800000  | 1019400000  | 979760000  |
| sp P48426 PIP4K2A | sp P48426 | 1 | 3  | 3  | 1  | 9.6 | 46.224 | 66896000   | 0          | 0          | 0           | 59077000    | 0          |
| sp P48444 ARCN1   | sp P48444 | 1 | 19 | 19 | 19 | 41  | 57.21  | 1825200000 | 2207500000 | 2130100000 | 1902400000  | 1944500000  | 2128500000 |
| sp P48449 LSS     | sp P48449 | 1 | 8  | 8  | 8  | 14  | 83.308 | 520530000  | 447180000  | 410310000  | 447470000   | 401990000   | 682210000  |
| sp P48506 GCLC    | sp P48506 | 1 | 10 | 10 | 10 | 22  | 72.765 | 380040000  | 440050000  | 455240000  | 501220000   | 465470000   | 471160000  |
| sp P48507 GCLM    | sp P48507 | 1 | 8  | 8  | 8  | 38  | 30.727 | 1695000000 | 2000800000 | 1568200000 | 2459500000  | 3220300000  | 2721700000 |
| sp P48509 CD151   | sp P48509 | 1 | 3  | 3  | 3  | 11  | 28.295 | 0          | 366600000  | 0          | 0           | 345370000   | 368720000  |
| sp P48556 PSMD8   | sp P48556 | 1 | 7  | 7  | 7  | 25  | 39.611 | 1446900000 | 1480800000 | 1180600000 | 1369200000  | 1372600000  | 1367600000 |
| sp P48634 PRRC2A  | sp P48634 | 1 | 8  | 7  | 7  | 6.6 | 228.86 | 177910000  | 152520000  | 132350000  | 160050000   | 139330000   | 150240000  |
| sp P48637 GSS     | sp P48637 | 1 | 13 | 13 | 13 | 34  | 52.384 | 1014500000 | 1023200000 | 1076900000 | 855100000   | 927910000   | 973160000  |
| sp P48643 CCT5    | sp P48643 | 1 | 36 | 36 | 36 | 72  | 59.67  | 1.6834E+10 | 1.7972E+10 | 1.6914E+10 | 15537000000 | 15466000000 | 1.7047E+10 |
| sp P48657 PTDSS1  | sp P48657 | 1 | 6  | 6  | 6  | 18  | 55.527 | 230160000  | 220130000  | 199360000  | 245430000   | 211770000   | 175670000  |
| sp P48687 NES     | sp P48687 | 1 | 3  | 3  | 3  | 2.5 | 177.44 | 0          | 13856000   | 0          | 0           | 0           | 101000000  |
| sp P48723 HSPA13  | sp P48723 | 1 | 6  | 6  | 6  | 19  | 51.927 | 142730000  | 215370000  | 145420000  | 187650000   | 173990000   | 175060000  |
| sp P48729 CSNK1A1 | sp P48729 | 2 | 6  | 6  | 6  | 23  | 38.914 | 340940000  | 385050000  | 264350000  | 316300000   | 351280000   | 387790000  |
| sp P48730 CSNK1D  | sp P48730 | 2 | 5  | 5  | 5  | 18  | 47.33  | 198530000  | 255210000  | 0          | 172320000   | 189750000   | 0          |
| sp P48735 IDH2    | sp P48735 | 1 | 4  | 4  | 4  | 11  | 50.909 | 151310000  | 152730000  | 176290000  | 181500000   | 267090000   | 152470000  |
| sp P48739 PITPNB  | sp P48739 | 1 | 12 | 12 | 11 | 53  | 31.54  | 1146100000 | 1476200000 | 1140200000 | 1321400000  | 1301800000  | 1497500000 |
| sp P48960 CD97    | sp P48960 | 2 | 10 | 10 | 10 | 18  | 91.868 | 1120300000 | 1243900000 | 1117100000 | 1448200000  | 1716700000  | 1279400000 |
| sp P49005 POLD2   | sp P49005 | 1 | 9  | 9  | 9  | 34  | 51.289 | 470540000  | 365780000  | 374670000  | 355060000   | 356510000   | 349420000  |
| sp P49006 MARCKS1 | sp P49006 | 1 | 2  | 2  | 2  | 14  | 19.529 | 495250000  | 0          | 0          | 164930000   | 0           | 342170000  |
| sp P49023 PXN     | sp P49023 | 1 | 13 | 13 | 13 | 36  | 64.505 | 795630000  | 782020000  | 539050000  | 576240000   | 665180000   | 718370000  |
| sp P49189 ALDH9A1 | sp P49189 | 1 | 15 | 15 | 15 | 35  | 53.801 | 1137100000 | 1525400000 | 1078700000 | 1163900000  | 1499400000  | 1306300000 |
| sp P49207 RPL34   | sp P49207 | 1 | 5  | 5  | 5  | 36  | 13.293 | 5056600000 | 5312400000 | 4901200000 | 5170400000  | 5812500000  | 5248500000 |
| sp P49247 RPIA    | sp P49247 | 1 | 1  | 1  | 1  | 5.1 | 33.269 | 0          | 0          | 0          | 0           | 0           | 22923000   |
| sp P49257 LMAN1   | sp P49257 | 1 | 13 | 13 | 13 | 35  | 57.548 | 4330000000 | 3812600000 | 4729800000 | 4480900000  | 4416200000  | 3959000000 |
| sp P49327 NASP    | sp P49327 | 1 | 23 | 23 | 23 | 49  | 85.237 | 5153100000 | 5403300000 | 5874600000 | 5181900000  | 5059200000  | 4088900000 |
| sp P49327 FASN    | sp P49327 | 1 | 87 | 87 | 87 | 47  | 273.42 | 3.3325E+10 | 3.3636E+10 | 3.3584E+10 | 27855000000 | 25900000000 | 2.7242E+10 |
| sp P49354 FNTA    | sp P49354 | 1 | 5  | 5  | 5  | 15  | 44.408 | 132470000  | 132430000  | 120100000  | 121950000   | 102270000   | 119570000  |

|                   |           |   |    |    |    |     |        |            |            |            |             |             |            |
|-------------------|-----------|---|----|----|----|-----|--------|------------|------------|------------|-------------|-------------|------------|
| sp P49356 FNTB    | sp P49356 | 1 | 1  | 1  | 1  | 3.7 | 48.773 | 0          | 0          | 0          | 0           | 0           | 50552000   |
| sp P49366 DHPS    | sp P49366 | 1 | 2  | 2  | 2  | 8.7 | 40.97  | 0          | 173000000  | 0          | 0           | 0           | 0          |
| sp P49368 CCT3    | sp P49368 | 1 | 35 | 35 | 35 | 65  | 60.533 | 2.4999E+10 | 2.7424E+10 | 2.5754E+10 | 23939000000 | 24959000000 | 2.3023E+10 |
| sp P49406 MRPL19  | sp P49406 | 1 | 5  | 5  | 5  | 17  | 33.535 | 181110000  | 209120000  | 184840000  | 220450000   | 205420000   | 171210000  |
| sp P49411 TUFM    | sp P49411 | 1 | 28 | 28 | 28 | 70  | 49.541 | 1.4662E+10 | 1.4006E+10 | 1.5977E+10 | 17288000000 | 16580000000 | 1.5897E+10 |
| sp P49419 ALDH7A1 | sp P49419 | 1 | 15 | 15 | 15 | 42  | 58.486 | 2617900000 | 2202900000 | 2226500000 | 2386700000  | 2509800000  | 2172000000 |
| sp P49441 INPP1   | sp P49441 | 1 | 1  | 1  | 1  | 3   | 43.998 | 0          | 0          | 0          | 0           | 0           | 24610000   |
| sp P49454 CENPF   | sp P49454 | 1 | 7  | 7  | 7  | 3   | 367.76 | 0          | 100310000  | 0          | 0           | 0           | 0          |
| sp P49458 SRP9    | sp P49458 | 1 | 4  | 4  | 4  | 43  | 10.112 | 3375000000 | 4069400000 | 3235000000 | 2744400000  | 3287900000  | 3564200000 |
| sp P49585 PCYT1A  | sp P49585 | 2 | 4  | 4  | 4  | 15  | 41.731 | 231050000  | 278210000  | 257320000  | 228620000   | 244750000   | 220330000  |
| sp P49588 AARS    | sp P49588 | 1 | 34 | 34 | 34 | 50  | 106.81 | 4528200000 | 5053900000 | 4704600000 | 6598200000  | 6214400000  | 6049500000 |
| sp P49589 CARS    | sp P49589 | 1 | 14 | 14 | 14 | 23  | 85.472 | 719160000  | 784860000  | 735430000  | 997830000   | 1030600000  | 957270000  |
| sp P49590 HARS2   | sp P49590 | 1 | 8  | 3  | 3  | 16  | 56.888 | 0          | 0          | 109390000  | 0           | 0           | 0          |
| sp P49591 SARS    | sp P49591 | 1 | 16 | 16 | 16 | 38  | 58.777 | 3970900000 | 3636600000 | 3095100000 | 3596900000  | 4255000000  | 3408200000 |
| sp P49642 PRIM1   | sp P49642 | 1 | 6  | 6  | 6  | 19  | 49.901 | 208300000  | 279280000  | 274470000  | 228020000   | 243950000   | 356520000  |
| sp P49643 PRIM2   | sp P49643 | 1 | 9  | 9  | 9  | 22  | 58.805 | 381080000  | 358330000  | 498170000  | 339820000   | 253820000   | 326850000  |
| sp P49711 CTCF    | sp P49711 | 1 | 3  | 3  | 3  | 7.6 | 82.785 | 0          | 0          | 0          | 0           | 0           | 216900000  |
| sp P49720 PSMB3   | sp P49720 | 1 | 7  | 7  | 7  | 42  | 22.949 | 1920300000 | 1936800000 | 2387500000 | 2144400000  | 1872000000  | 1613900000 |
| sp P49721 PSMB2   | sp P49721 | 1 | 6  | 6  | 6  | 32  | 22.836 | 1387700000 | 1603400000 | 1411200000 | 1410100000  | 1216500000  | 1174800000 |
| sp P49736 MCM2    | sp P49736 | 1 | 27 | 27 | 27 | 37  | 101.89 | 4468200000 | 4348800000 | 4161500000 | 3882100000  | 4212100000  | 3957200000 |
| sp P49748 ACADVL  | sp P49748 | 1 | 24 | 24 | 24 | 49  | 70.389 | 4828800000 | 4930300000 | 4662100000 | 5900800000  | 5881600000  | 5745200000 |
| sp P49750 YLPM1   | sp P49750 | 1 | 5  | 5  | 5  | 3.6 | 241.64 | 238280000  | 167820000  | 247560000  | 123850000   | 203070000   | 215880000  |
| sp P49755 TMED10  | sp P49755 | 1 | 7  | 7  | 7  | 35  | 24.976 | 2532300000 | 2409100000 | 2464000000 | 2352500000  | 2117500000  | 2672700000 |
| sp P49756 RBM25   | sp P49756 | 1 | 14 | 14 | 14 | 20  | 100.18 | 935440000  | 1414700000 | 1008500000 | 1222600000  | 1380000000  | 1318200000 |
| sp P49757 NUMB    | sp P49757 | 1 | 2  | 2  | 2  | 6.9 | 70.803 | 0          | 0          | 0          | 103880000   | 0           | 0          |
| sp P49770 EIF2B2  | sp P49770 | 1 | 8  | 8  | 8  | 29  | 38.989 | 615700000  | 468740000  | 501280000  | 504620000   | 610920000   | 658900000  |
| sp P49773 HINT1   | sp P49773 | 1 | 8  | 8  | 8  | 75  | 13.802 | 9450200000 | 8662000000 | 6640700000 | 6808300000  | 4982200000  | 5357500000 |
| sp P49790 NUP153  | sp P49790 | 1 | 15 | 15 | 15 | 17  | 153.94 | 687320000  | 720230000  | 644790000  | 617520000   | 588500000   | 673640000  |
| sp P49792 RANBP2  | sp P49792 | 3 | 69 | 69 | 52 | 30  | 358.2  | 4175800000 | 4286700000 | 4225500000 | 4292500000  | 4463500000  | 4101500000 |
| sp P49821 NDUFV1  | sp P49821 | 1 | 5  | 5  | 5  | 19  | 50.817 | 380430000  | 436710000  | 306480000  | 300110000   | 286510000   | 243270000  |
| sp P49840 GSK3A   | sp P49840 | 1 | 7  | 7  | 5  | 22  | 50.98  | 172830000  | 0          | 174250000  | 0           | 136400000   | 126700000  |
| sp P49841 GSK3B   | sp P49841 | 1 | 6  | 4  | 4  | 26  | 46.744 | 113980000  | 182900000  | 155680000  | 153060000   | 124450000   | 137460000  |
| sp P49902 NT5C2   | sp P49902 | 1 | 5  | 5  | 5  | 12  | 64.969 | 100770000  | 124990000  | 0          | 171560000   | 203010000   | 0          |
| sp P49903 SEPHS1  | sp P49903 | 1 | 6  | 6  | 6  | 26  | 42.91  | 397810000  | 591880000  | 258960000  | 402310000   | 407920000   | 355600000  |
| sp P49914 MTHFS   | sp P49914 | 1 | 2  | 2  | 2  | 16  | 23.255 | 62183000   | 100080000  | 0          | 0           | 80486000    | 64025000   |
| sp P49915 GMPS    | sp P49915 | 1 | 21 | 21 | 21 | 43  | 76.715 | 2096600000 | 3108800000 | 2629800000 | 2920400000  | 2477700000  | 2364100000 |
| sp P49916 LIG3    | sp P49916 | 1 | 5  | 5  | 5  | 5.1 | 112.91 | 125670000  | 127420000  | 150550000  | 144140000   | 159280000   | 163620000  |
| sp P49917 LIG4    | sp P49917 | 1 | 1  | 1  | 1  | 1.5 | 103.97 | 0          | 0          | 0          | 0           | 0           | 40707000   |
| sp P49959 MRE11   | sp P49959 | 1 | 9  | 9  | 9  | 16  | 80.592 | 477220000  | 477560000  | 518590000  | 456160000   | 600970000   | 613600000  |

|                   |           |   |    |    |    |     |        |            |            |            |             |             |            |
|-------------------|-----------|---|----|----|----|-----|--------|------------|------------|------------|-------------|-------------|------------|
| sp P50135 HNMT    | sp P50135 | 1 | 2  | 2  | 2  | 14  | 33.295 | 206790000  | 158090000  | 137340000  | 125410000   | 234650000   | 159340000  |
| sp P50157 GNG10   | sp P50157 | 1 | 1  | 1  | 1  | 22  | 7.2053 | 0          | 0          | 0          | 0           | 0           | 19369000   |
| sp P50213 IDH3A   | sp P50213 | 1 | 11 | 11 | 11 | 34  | 39.591 | 2152500000 | 2679400000 | 2341100000 | 2346400000  | 2312100000  | 2305400000 |
| sp P50238 CRIP1   | sp P50238 | 1 | 3  | 3  | 3  | 56  | 8.5328 | 6189000000 | 3647800000 | 2573800000 | 5271200000  | 4696500000  | 4917200000 |
| sp P50336 PPOX    | sp P50336 | 1 | 2  | 2  | 2  | 10  | 50.765 | 60955000   | 0          | 62978000   | 129460000   | 91226000    | 0          |
| sp P50395 GDI2    | sp P50395 | 1 | 27 | 27 | 20 | 69  | 50.663 | 1.3886E+10 | 1.4053E+10 | 1.3911E+10 | 12692000000 | 13489000000 | 1.3338E+10 |
| sp P50402 EMD     | sp P50402 | 1 | 13 | 13 | 13 | 65  | 28.994 | 3532700000 | 3264000000 | 2397200000 | 3493600000  | 4580800000  | 4101600000 |
| sp P50416 CPT1A   | sp P50416 | 1 | 20 | 20 | 20 | 29  | 88.367 | 2921000000 | 2466500000 | 2212900000 | 2407100000  | 2776400000  | 3293000000 |
| sp P50452 SERPINB | sp P50452 | 1 | 3  | 2  | 2  | 8.6 | 42.766 | 0          | 30990000   | 0          | 0           | 0           | 0          |
| sp P50453 SERPINB | sp P50453 | 1 | 1  | 1  | 1  | 2.9 | 42.403 | 0          | 0          | 0          | 0           | 62574000    | 0          |
| sp P50454 SERPINH | sp P50454 | 1 | 19 | 19 | 19 | 48  | 46.44  | 2.1465E+10 | 2.0332E+10 | 2.0557E+10 | 22862000000 | 21304000000 | 2.3027E+10 |
| sp P50502 ST13    | sp P50502 | 3 | 10 | 10 | 10 | 28  | 41.331 | 7812600000 | 6678400000 | 6793200000 | 6408200000  | 6152900000  | 6402700000 |
| sp P50552 VASP    | sp P50552 | 1 | 10 | 10 | 10 | 36  | 39.829 | 1143700000 | 1006500000 | 1341200000 | 1009500000  | 1240300000  | 1212500000 |
| sp P50570 DNM2    | sp P50570 | 2 | 19 | 19 | 13 | 29  | 98.063 | 1311100000 | 1293100000 | 1358200000 | 1374200000  | 1263100000  | 1105700000 |
| sp P50579 METAP2  | sp P50579 | 1 | 14 | 14 | 14 | 35  | 52.891 | 2816600000 | 2831100000 | 2434300000 | 2098200000  | 2474900000  | 2905000000 |
| sp P50583 NUDT2   | sp P50583 | 1 | 4  | 4  | 4  | 46  | 16.829 | 364060000  | 469820000  | 309080000  | 299780000   | 400760000   | 448600000  |
| sp P50613 CDK7    | sp P50613 | 1 | 2  | 2  | 2  | 12  | 39.038 | 74968000   | 116950000  | 94153000   | 111670000   | 118790000   | 111430000  |
| sp P50748 KNTC1   | sp P50748 | 1 | 5  | 5  | 5  | 2.9 | 250.75 | 195620000  | 272200000  | 270190000  | 246880000   | 242990000   | 118670000  |
| sp P50750 CDK9    | sp P50750 | 1 | 5  | 5  | 5  | 17  | 42.777 | 0          | 0          | 0          | 163310000   | 0           | 0          |
| sp P50851 LRBA    | sp P50851 | 1 | 7  | 7  | 7  | 3.3 | 319.1  | 179060000  | 205070000  | 203620000  | 191710000   | 200820000   | 190580000  |
| sp P50897 PPT1    | sp P50897 | 1 | 7  | 7  | 7  | 31  | 34.193 | 1593900000 | 1428200000 | 1096700000 | 1090600000  | 1196500000  | 1157500000 |
| sp P50914 RPL14   | sp P50914 | 1 | 5  | 5  | 5  | 24  | 23.432 | 7139800000 | 7947900000 | 7143000000 | 9473100000  | 9904700000  | 7481500000 |
| sp P50990 CCT8    | sp P50990 | 1 | 36 | 36 | 36 | 72  | 59.62  | 2.5905E+10 | 2.2624E+10 | 2.6055E+10 | 26595000000 | 27463000000 | 2.3657E+10 |
| sp P50997 CCT4    | sp P50997 | 1 | 28 | 28 | 28 | 61  | 57.924 | 1.6649E+10 | 1.7044E+10 | 1.7438E+10 | 15918000000 | 17504000000 | 1.822E+10  |
| sp P50993 ATP1A2  | sp P50993 | 1 | 14 | 1  | 1  | 18  | 112.26 | 0          | 0          | 0          | 0           | 52004000    | 0          |
| sp P50995 ANXA11  | sp P50995 | 1 | 13 | 13 | 13 | 29  | 54.389 | 982810000  | 1190200000 | 992470000  | 946320000   | 999770000   | 1183400000 |
| sp P51003 PAPOLA  | sp P51003 | 3 | 7  | 7  | 7  | 12  | 82.842 | 203170000  | 206880000  | 198790000  | 168280000   | 166140000   | 188640000  |
| sp P51114 FXR1    | sp P51114 | 1 | 11 | 11 | 10 | 24  | 69.72  | 949230000  | 1211900000 | 1129300000 | 900230000   | 1086600000  | 998040000  |
| sp P51116 FXR2    | sp P51116 | 1 | 9  | 8  | 7  | 18  | 74.222 | 492920000  | 523460000  | 611590000  | 610400000   | 499970000   | 559590000  |
| sp P51148 RAB5C   | sp P51148 | 1 | 10 | 10 | 7  | 72  | 23.482 | 3185100000 | 2596100000 | 3144300000 | 3196900000  | 3099900000  | 3136600000 |
| sp P51149 RAB7A   | sp P51149 | 1 | 15 | 15 | 15 | 74  | 23.489 | 4150700000 | 4312600000 | 4253200000 | 4105300000  | 4826600000  | 4399100000 |
| sp P51151 RAB9A   | sp P51151 | 2 | 4  | 4  | 4  | 27  | 22.837 | 0          | 0          | 136440000  | 274560000   | 144140000   | 179050000  |
| sp P51153 RAB13   | sp P51153 | 1 | 4  | 2  | 2  | 20  | 22.774 | 167410000  | 205610000  | 223840000  | 170310000   | 0           | 0          |
| sp P51159 RAB27A  | sp P51159 | 1 | 1  | 1  | 1  | 4.1 | 24.868 | 0          | 0          | 0          | 0           | 0           | 40358000   |
| sp P51172 SCNN1D  | sp P51172 | 1 | 1  | 1  | 1  | 2.4 | 70.214 | 0          | 0          | 0          | 0           | 0           | 59125000   |
| sp P51398 DAP3    | sp P51398 | 1 | 9  | 9  | 9  | 31  | 45.566 | 657520000  | 759410000  | 841240000  | 568250000   | 633150000   | 639880000  |
| sp P51452 DUSP3   | sp P51452 | 1 | 4  | 4  | 4  | 29  | 20.478 | 289070000  | 152230000  | 226820000  | 208780000   | 190770000   | 173070000  |
| sp P51537 SMARCA4 | sp P51537 | 1 | 11 | 4  | 4  | 8.7 | 181.28 | 167630000  | 73023000   | 167880000  | 282050000   | 127650000   | 123630000  |
| sp P51532 SMARCA4 | sp P51532 | 1 | 16 | 16 | 9  | 12  | 184.64 | 2252900000 | 2081900000 | 2332400000 | 1967300000  | 2115000000  | 2301600000 |

|                    |           |   |    |    |    |     |        |            |            |            |             |             |            |
|--------------------|-----------|---|----|----|----|-----|--------|------------|------------|------------|-------------|-------------|------------|
| sp P51553 IDH3G    | sp P51553 | 1 | 7  | 7  | 7  | 32  | 42.794 | 669610000  | 783100000  | 609720000  | 888740000   | 942800000   | 708560000  |
| sp P51570 GALK1    | sp P51570 | 1 | 7  | 7  | 7  | 29  | 42.272 | 297920000  | 316110000  | 258590000  | 343040000   | 294890000   | 263400000  |
| sp P51571 SSR4     | sp P51571 | 1 | 5  | 5  | 5  | 36  | 18.998 | 2435200000 | 2391500000 | 2730500000 | 2766400000  | 2618700000  | 2485000000 |
| sp P51572 BCAP31   | sp P51572 | 1 | 9  | 9  | 9  | 32  | 27.991 | 2071500000 | 3117900000 | 2086600000 | 2127700000  | 2154500000  | 2080400000 |
| sp P51608 MECP2    | sp P51608 | 1 | 1  | 1  | 1  | 2.9 | 52.44  | 0          | 0          | 0          | 0           | 0           | 19579000   |
| sp P51610 HCFC1    | sp P51610 | 2 | 23 | 23 | 23 | 18  | 208.73 | 1598800000 | 1849300000 | 1528800000 | 1558400000  | 1581100000  | 1605600000 |
| sp P51636 CAV2     | sp P51636 | 1 | 2  | 2  | 2  | 21  | 18.291 | 146260000  | 0          | 52721000   | 0           | 0           | 0          |
| sp P51648 ALDH3A2  | sp P51648 | 1 | 13 | 13 | 12 | 29  | 54.847 | 1923800000 | 2408600000 | 1950000000 | 2135300000  | 2400300000  | 2108900000 |
| sp P51659 HSD17B4  | sp P51659 | 1 | 27 | 27 | 27 | 51  | 79.685 | 3859400000 | 4097000000 | 4089100000 | 4142900000  | 4985300000  | 4719000000 |
| sp P51665 PSMD7    | sp P51665 | 1 | 7  | 7  | 7  | 30  | 37.025 | 1464300000 | 1710600000 | 1262500000 | 1143600000  | 1124400000  | 1783300000 |
| sp P51692 STAT5B   | sp P51692 | 2 | 7  | 7  | 7  | 9.5 | 89.865 | 113740000  | 122160000  | 0          | 177720000   | 89823000    | 166950000  |
| sp P51790 CLCN3    | sp P51790 | 1 | 1  | 1  | 1  | 2.2 | 90.965 | 0          | 0          | 0          | 0           | 0           | 22720000   |
| sp P51808 DYNLT3   | sp P51808 | 1 | 3  | 3  | 3  | 65  | 13.062 | 0          | 150230000  | 152110000  | 166110000   | 205410000   | 0          |
| sp P51809 VAMP7    | sp P51809 | 1 | 5  | 5  | 5  | 29  | 24.935 | 128480000  | 274060000  | 239620000  | 249290000   | 324160000   | 0          |
| sp P51812 RPS6KA3  | sp P51812 | 1 | 13 | 13 | 8  | 23  | 83.735 | 901500000  | 766470000  | 951940000  | 960350000   | 893180000   | 1040400000 |
| sp P51857 AKR1D1   | sp P51857 | 1 | 1  | 1  | 1  | 2.8 | 37.376 | 0          | 0          | 0          | 0           | 0           | 509160000  |
| sp P51858 HDGF     | sp P51858 | 1 | 21 | 21 | 20 | 79  | 26.788 | 1.064E+10  | 1.0242E+10 | 9986600000 | 10287000000 | 9957200000  | 9304000000 |
| sp P51948 MNAT1    | sp P51948 | 1 | 3  | 3  | 3  | 14  | 35.823 | 411840000  | 331220000  | 279760000  | 316610000   | 0           | 0          |
| sp P51965 UBE2E1   | sp P51965 | 1 | 1  | 1  | 1  | 9.3 | 21.404 | 0          | 0          | 0          | 0           | 0           | 85245000   |
| sp P51970 NDUFA8   | sp P51970 | 1 | 6  | 6  | 6  | 52  | 20.105 | 594350000  | 530450000  | 404120000  | 483860000   | 473330000   | 390240000  |
| sp P51991 HNRNPA3  | sp P51991 | 1 | 14 | 14 | 14 | 44  | 39.594 | 1.3958E+10 | 1.1604E+10 | 1.2257E+10 | 12892000000 | 12967000000 | 1.1704E+10 |
| sp P52209 PGD      | sp P52209 | 1 | 22 | 22 | 22 | 59  | 53.139 | 1.094E+10  | 1.0262E+10 | 1.2862E+10 | 9554800000  | 7527900000  | 8354400000 |
| sp P52272 HNRNPM   | sp P52272 | 1 | 37 | 37 | 37 | 60  | 77.515 | 1.6257E+10 | 1.7805E+10 | 1.6181E+10 | 18698000000 | 17717000000 | 2.0665E+10 |
| sp P52292 KPNA2    | sp P52292 | 1 | 17 | 17 | 17 | 53  | 57.861 | 5706400000 | 4845100000 | 5069400000 | 5157200000  | 4969700000  | 5010700000 |
| sp P52294 KPNA1    | sp P52294 | 1 | 8  | 5  | 5  | 18  | 60.221 | 338580000  | 340640000  | 277510000  | 314020000   | 360260000   | 274140000  |
| sp P52298 NCBP2    | sp P52298 | 1 | 3  | 3  | 3  | 21  | 18.001 | 118310000  | 109000000  | 0          | 78151000    | 105800000   | 0          |
| sp P52306 RAP1GDS  | sp P52306 | 1 | 15 | 15 | 15 | 36  | 66.316 | 907040000  | 1045700000 | 970180000  | 997890000   | 894910000   | 908250000  |
| sp P52434 POLR2H   | sp P52434 | 1 | 5  | 5  | 5  | 41  | 17.143 | 944380000  | 1003800000 | 885360000  | 703430000   | 1119700000  | 1165900000 |
| sp Q9H1A POLR2J3   | sp Q9H1A  | 3 | 2  | 2  | 2  | 24  | 13.092 | 39516000   | 46400000   | 60055000   | 64752000    | 46119000    | 37095000   |
| sp P52565 ARHGDIAP | sp P52565 | 1 | 9  | 9  | 9  | 65  | 23.207 | 1.0332E+10 | 1.034E+10  | 1.2988E+10 | 10820000000 | 9948500000  | 1.157E+10  |
| sp P52594 AGFG1    | sp P52594 | 1 | 5  | 5  | 5  | 17  | 58.259 | 539860000  | 711380000  | 855680000  | 521850000   | 547260000   | 480130000  |
| sp P52597 HNRNPF   | sp P52597 | 1 | 17 | 15 | 15 | 58  | 45.671 | 4163900000 | 4273200000 | 4386300000 | 4461000000  | 4937800000  | 4873400000 |
| sp P52655 GTF2A1   | sp P52655 | 1 | 1  | 1  | 1  | 2.9 | 41.513 | 0          | 0          | 0          | 0           | 0           | 56785000   |
| sp P52701 MSH6     | sp P52701 | 1 | 21 | 21 | 21 | 23  | 152.78 | 1292000000 | 1189000000 | 1549400000 | 1386200000  | 1255900000  | 1371600000 |
| sp P52732 KIF11    | sp P52732 | 1 | 7  | 7  | 7  | 8.7 | 119.16 | 385830000  | 366470000  | 331720000  | 432520000   | 500270000   | 448360000  |
| sp P52735 VAV2     | sp P52735 | 1 | 8  | 8  | 8  | 13  | 101.29 | 169160000  | 129210000  | 206060000  | 185370000   | 185220000   | 253200000  |
| sp P52756 RBM5     | sp P52756 | 1 | 3  | 3  | 3  | 4.8 | 92.153 | 0          | 0          | 0          | 0           | 69214000    | 0          |
| sp P52758 RIDA     | sp P52758 | 1 | 1  | 1  | 1  | 12  | 14.494 | 0          | 0          | 0          | 0           | 0           | 111320000  |
| sp P52788 SMS      | sp P52788 | 1 | 14 | 14 | 14 | 56  | 41.268 | 1212600000 | 1525000000 | 1294200000 | 1331500000  | 1244800000  | 1063000000 |

|                   |           |   |    |    |    |     |        |            |            |            |             |             |            |
|-------------------|-----------|---|----|----|----|-----|--------|------------|------------|------------|-------------|-------------|------------|
| sp P52789 HK2     | sp P52789 | 2 | 16 | 12 | 12 | 22  | 102.38 | 535980000  | 563380000  | 475230000  | 673570000   | 894200000   | 706040000  |
| sp P52815 MRPL12  | sp P52815 | 1 | 6  | 6  | 6  | 40  | 21.348 | 1489700000 | 2787000000 | 1133000000 | 2183700000  | 2661800000  | 2655500000 |
| sp P52888 THOP1   | sp P52888 | 1 | 11 | 11 | 11 | 20  | 78.839 | 1181200000 | 900520000  | 1007300000 | 938130000   | 1024800000  | 831500000  |
| sp P52895 AKR1C2  | sp P52895 | 1 | 18 | 18 | 5  | 65  | 36.735 | 2.9256E+10 | 3.0178E+10 | 2.6721E+10 | 27855000000 | 25553000000 | 2.4395E+10 |
| sp P52907 CAPZA1  | sp P52907 | 1 | 12 | 12 | 10 | 66  | 32.922 | 6949200000 | 6159700000 | 8003200000 | 8647100000  | 8206600000  | 7951800000 |
| sp P52943 CRIP2   | sp P52943 | 1 | 9  | 9  | 9  | 48  | 22.492 | 2862900000 | 2810300000 | 2168400000 | 2248200000  | 2941300000  | 1910500000 |
| sp P52948 NUP98   | sp P52948 | 1 | 22 | 22 | 22 | 16  | 197.58 | 1539000000 | 1353800000 | 1474400000 | 1587200000  | 1307600000  | 1175300000 |
| sp P53004 BLVRA   | sp P53004 | 1 | 5  | 5  | 5  | 21  | 33.428 | 572920000  | 636740000  | 612700000  | 533590000   | 600900000   | 608200000  |
| sp P53007 SLC25A1 | sp P53007 | 1 | 4  | 4  | 4  | 15  | 34.012 | 339650000  | 465600000  | 448870000  | 275080000   | 340510000   | 332120000  |
| sp P53041 PPP5C   | sp P53041 | 1 | 8  | 8  | 8  | 23  | 56.878 | 825740000  | 694090000  | 769160000  | 732880000   | 804640000   | 969160000  |
| sp P53350 PLK1    | sp P53350 | 1 | 9  | 9  | 9  | 23  | 68.254 | 266100000  | 343560000  | 369230000  | 484850000   | 544220000   | 693200000  |
| sp P53365 ARFIP2  | sp P53365 | 1 | 3  | 3  | 3  | 8.8 | 37.855 | 0          | 0          | 0          | 0           | 182180000   | 0          |
| sp P53367 ARFIP1  | sp P53367 | 1 | 6  | 6  | 6  | 25  | 41.738 | 0          | 261360000  | 332330000  | 0           | 0           | 265720000  |
| sp P53384 NUBP1   | sp P53384 | 1 | 4  | 4  | 4  | 20  | 34.534 | 237590000  | 254010000  | 274110000  | 242200000   | 339880000   | 328390000  |
| sp P53396 ACLY    | sp P53396 | 1 | 49 | 49 | 49 | 50  | 120.84 | 2.415E+10  | 2.4083E+10 | 2.526E+10  | 23003000000 | 21585000000 | 2.0998E+10 |
| sp P53582 METAP1  | sp P53582 | 1 | 10 | 10 | 10 | 40  | 43.215 | 1003400000 | 829860000  | 1137600000 | 814410000   | 896520000   | 978060000  |
| sp P53597 SUCLG1  | sp P53597 | 1 | 5  | 5  | 5  | 20  | 36.249 | 904780000  | 603850000  | 911580000  | 1254700000  | 1616700000  | 1504900000 |
| sp P53602 MVD     | sp P53602 | 1 | 2  | 2  | 2  | 11  | 43.404 | 0          | 0          | 0          | 0           | 49373000    | 0          |
| sp P53611 RABGGT  | sp P53611 | 1 | 3  | 3  | 3  | 11  | 36.924 | 0          | 145100000  | 261670000  | 221210000   | 0           | 167910000  |
| sp P53618 COPB1   | sp P53618 | 1 | 24 | 24 | 24 | 38  | 107.14 | 4738400000 | 4471500000 | 4844600000 | 4654000000  | 4520900000  | 4989700000 |
| sp P53621 COPA    | sp P53621 | 1 | 53 | 53 | 53 | 54  | 138.34 | 7418600000 | 8834100000 | 7605400000 | 7845200000  | 8070400000  | 7367900000 |
| sp P53634 CTSC    | sp P53634 | 1 | 7  | 7  | 7  | 21  | 51.853 | 265690000  | 293880000  | 274650000  | 384050000   | 446930000   | 524050000  |
| sp P53680 AP2S1   | sp P53680 | 1 | 3  | 3  | 3  | 17  | 17.018 | 271870000  | 187950000  | 180940000  | 0           | 0           | 144070000  |
| sp P53701 HCCS    | sp P53701 | 1 | 13 | 13 | 13 | 59  | 30.601 | 1600500000 | 1180400000 | 1607400000 | 1471700000  | 1390200000  | 1057300000 |
| sp P53801 PTTG1IP | sp P53801 | 1 | 2  | 2  | 2  | 14  | 20.324 | 541460000  | 0          | 209440000  | 882500000   | 388040000   | 217320000  |
| sp P53985 SLC16A1 | sp P53985 | 1 | 5  | 5  | 5  | 8   | 53.944 | 1407000000 | 759790000  | 701030000  | 1236300000  | 1018500000  | 888600000  |
| sp P53990 IST1    | sp P53990 | 1 | 6  | 6  | 6  | 19  | 39.75  | 229380000  | 225160000  | 216870000  | 243060000   | 190110000   | 152600000  |
| sp P53992 SEC24C  | sp P53992 | 1 | 15 | 15 | 15 | 20  | 118.32 | 1164500000 | 1001200000 | 1166500000 | 1284200000  | 1188500000  | 1101600000 |
| sp P53999 SUB1    | sp P53999 | 1 | 7  | 7  | 7  | 60  | 14.395 | 1.1036E+10 | 1.0301E+10 | 8775200000 | 9093100000  | 11414000000 | 1.031E+10  |
| sp P54105 CLNS1A  | sp P54105 | 1 | 5  | 5  | 5  | 41  | 26.215 | 594310000  | 839500000  | 875330000  | 666940000   | 567720000   | 798110000  |
| sp P54136 RARS    | sp P54136 | 1 | 29 | 29 | 29 | 51  | 75.378 | 5308900000 | 5163300000 | 5556800000 | 5250300000  | 5142200000  | 5046400000 |
| sp P54289 CACNA2D | sp P54289 | 2 | 5  | 5  | 5  | 6.6 | 124.57 | 108610000  | 107580000  | 85393000   | 74775000    | 149030000   | 124380000  |
| sp P54577 YARS    | sp P54577 | 1 | 30 | 30 | 30 | 57  | 59.143 | 6744800000 | 7647900000 | 6445800000 | 7800800000  | 7551000000  | 8708400000 |
| sp P54578 USP14   | sp P54578 | 1 | 20 | 20 | 20 | 52  | 56.068 | 3363300000 | 3500800000 | 2975800000 | 3077200000  | 3192800000  | 3006000000 |
| sp P54619 PRKAG1  | sp P54619 | 1 | 2  | 2  | 1  | 8.5 | 37.579 | 131440000  | 91045000   | 106410000  | 72912000    | 85178000    | 0          |
| sp P54687 BCAT1   | sp P54687 | 1 | 2  | 2  | 2  | 8.5 | 42.966 | 0          | 0          | 43566000   | 52838000    | 53458000    | 0          |
| sp P54709 ATP1B3  | sp P54709 | 1 | 10 | 10 | 10 | 42  | 31.512 | 1069900000 | 1017500000 | 1193000000 | 1184200000  | 1226000000  | 1174400000 |
| sp P54725 RAD23A  | sp P54725 | 1 | 12 | 10 | 10 | 57  | 39.609 | 1380500000 | 1385400000 | 1243700000 | 982450000   | 993380000   | 1528700000 |
| sp P54727 RAD23B  | sp P54727 | 1 | 13 | 13 | 11 | 53  | 43.171 | 3500900000 | 3688700000 | 3302900000 | 2996900000  | 2770200000  | 3247200000 |

|                   |           |   |    |    |    |     |        |            |            |            |             |             |            |
|-------------------|-----------|---|----|----|----|-----|--------|------------|------------|------------|-------------|-------------|------------|
| sp P54819 AK2     | sp P54819 | 1 | 10 | 10 | 10 | 56  | 26.477 | 4345600000 | 3526800000 | 3598100000 | 3371900000  | 3326600000  | 3666900000 |
| sp P54852 EMP3    | sp P54852 | 1 | 1  | 1  | 1  | 8.6 | 18.429 | 0          | 0          | 0          | 0           | 0           | 136210000  |
| sp P54886 ALDH18A | sp P54886 | 1 | 27 | 27 | 27 | 42  | 87.301 | 3199100000 | 2632600000 | 2832200000 | 3080700000  | 2822600000  | 2914100000 |
| sp P54920 NAPA    | sp P54920 | 2 | 12 | 12 | 12 | 54  | 33.232 | 2183000000 | 1955700000 | 1523600000 | 2115500000  | 2620500000  | 2383900000 |
| sp P55010 EIF5    | sp P55010 | 1 | 8  | 8  | 8  | 19  | 49.222 | 1729200000 | 1852600000 | 1838700000 | 1494400000  | 1637000000  | 1788400000 |
| sp P55011 SLC12A2 | sp P55011 | 1 | 4  | 4  | 4  | 6.8 | 131.45 | 118390000  | 99761000   | 110720000  | 0           | 158050000   | 105660000  |
| sp P55036 PSMD4   | sp P55036 | 1 | 10 | 10 | 9  | 40  | 40.736 | 1706700000 | 1560800000 | 1566200000 | 1536600000  | 1927800000  | 1641400000 |
| sp P55039 DRG2    | sp P55039 | 1 | 10 | 10 | 10 | 35  | 40.746 | 308850000  | 516380000  | 471520000  | 632350000   | 434190000   | 392680000  |
| sp P55060 CSE1L   | sp P55060 | 1 | 33 | 33 | 33 | 39  | 110.42 | 1.5776E+10 | 1.4539E+10 | 1.4296E+10 | 14722000000 | 12812000000 | 1.4364E+10 |
| sp P55072 VCP     | sp P55072 | 1 | 47 | 47 | 47 | 71  | 89.321 | 4.317E+10  | 4.3019E+10 | 4.2441E+10 | 39421000000 | 40680000000 | 3.6273E+10 |
| sp P55081 MFAP1   | sp P55081 | 1 | 3  | 3  | 3  | 11  | 51.958 | 206990000  | 0          | 288490000  | 176920000   | 198820000   | 239740000  |
| sp P55084 HADHB   | sp P55084 | 1 | 17 | 17 | 17 | 41  | 51.294 | 2077100000 | 2302100000 | 2028300000 | 2526300000  | 2731100000  | 2351000000 |
| sp P55145 MANF    | sp P55145 | 1 | 8  | 8  | 8  | 35  | 20.7   | 1594900000 | 1533200000 | 1533100000 | 1867600000  | 2903500000  | 1586300000 |
| sp P55196 AFDN    | sp P55196 | 1 | 3  | 3  | 3  | 2.4 | 206.8  | 0          | 0          | 0          | 0           | 0           | 1029400000 |
| sp P55209 NAP1L1  | sp P55209 | 1 | 11 | 10 | 10 | 39  | 45.374 | 5344700000 | 5305500000 | 5952000000 | 6192600000  | 6805800000  | 6313100000 |
| sp P55211 CASP9   | sp P55211 | 1 | 1  | 1  | 1  | 7.7 | 46.28  | 0          | 0          | 0          | 0           | 29482000    | 0          |
| sp P55212 CASP6   | sp P55212 | 1 | 1  | 1  | 1  | 3.8 | 33.31  | 0          | 0          | 0          | 0           | 0           | 8147600    |
| sp P55263 ADK     | sp P55263 | 1 | 9  | 9  | 9  | 27  | 40.545 | 1210400000 | 1019500000 | 1227000000 | 1190000000  | 1085000000  | 1118200000 |
| sp P55265 ADAR    | sp P55265 | 1 | 24 | 24 | 24 | 30  | 136.06 | 2063600000 | 1669000000 | 2352700000 | 2106900000  | 2007900000  | 2268400000 |
| sp P55290 CDH13   | sp P55290 | 1 | 1  | 1  | 1  | 2   | 78.286 | 0          | 0          | 0          | 0           | 0           | 67919000   |
| sp P55327 TPD52   | sp P55327 | 1 | 9  | 9  | 9  | 58  | 24.327 | 1879800000 | 2168500000 | 2390800000 | 1739600000  | 2003000000  | 2081000000 |
| sp P55735 SEC13   | sp P55735 | 1 | 9  | 9  | 9  | 45  | 35.54  | 2998700000 | 2840900000 | 2752300000 | 2486700000  | 3261200000  | 2625500000 |
| sp P55769 SNU13   | sp P55769 | 1 | 7  | 7  | 7  | 53  | 14.173 | 1736100000 | 1914800000 | 1974800000 | 1785200000  | 1909500000  | 2243500000 |
| sp P55786 NPEPPS  | sp P55786 | 2 | 34 | 34 | 34 | 48  | 103.28 | 4964600000 | 5468600000 | 4929800000 | 4995900000  | 4682500000  | 4456100000 |
| sp P55795 HNRNPH2 | sp P55795 | 1 | 11 | 6  | 6  | 37  | 49.263 | 1387800000 | 1426700000 | 1410400000 | 1790000000  | 1967300000  | 1634500000 |
| sp P55809 OXCT1   | sp P55809 | 2 | 17 | 17 | 17 | 41  | 56.157 | 7003300000 | 6614100000 | 7772500000 | 7526400000  | 8428000000  | 8513200000 |
| sp P55854 SUMO3   | sp P55854 | 2 | 2  | 2  | 1  | 20  | 11.637 | 826140000  | 0          | 1442400000 | 0           | 0           | 1963600000 |
| sp P55884 EIF3B   | sp P55884 | 1 | 29 | 29 | 29 | 47  | 92.48  | 7799300000 | 8013400000 | 7951200000 | 8369900000  | 7605000000  | 8763500000 |
| sp P55957 BID     | sp P55957 | 1 | 2  | 2  | 2  | 20  | 21.994 | 290080000  | 352060000  | 242920000  | 207930000   | 231810000   | 313120000  |
| sp P56134 ATP5J2  | sp P56134 | 1 | 3  | 3  | 3  | 39  | 10.918 | 539930000  | 618190000  | 626760000  | 552130000   | 573200000   | 522660000  |
| sp P56182 RRP1    | sp P56182 | 1 | 12 | 12 | 12 | 30  | 52.839 | 799020000  | 1069700000 | 913460000  | 981070000   | 967120000   | 898270000  |
| sp P56192 MARS    | sp P56192 | 1 | 27 | 27 | 27 | 43  | 101.11 | 3979900000 | 4009300000 | 3796900000 | 4352600000  | 4095500000  | 3853200000 |
| sp P56211 ARPP19  | sp P56211 | 1 | 5  | 4  | 4  | 57  | 12.323 | 179220000  | 159950000  | 0          | 253300000   | 0           | 105320000  |
| sp P56270 MAZ     | sp P56270 | 1 | 2  | 2  | 2  | 6.7 | 48.607 | 164350000  | 139760000  | 161320000  | 231440000   | 165930000   | 189440000  |
| sp Q5VTU ATP5EP2  | sp Q5VTU  | 2 | 2  | 2  | 2  | 29  | 5.8068 | 836280000  | 565410000  | 609630000  | 920620000   | 161370000   | 1054800000 |
| sp P56385 ATP5ME  | sp P56385 | 1 | 4  | 4  | 4  | 42  | 7.9331 | 876740000  | 1064900000 | 790580000  | 1057500000  | 1200900000  | 1019100000 |
| sp P56537 EIF6    | sp P56537 | 1 | 8  | 8  | 8  | 57  | 26.599 | 4176500000 | 4812800000 | 4696400000 | 4745600000  | 5503900000  | 5377700000 |
| sp P56545 CTBP2   | sp P56545 | 1 | 10 | 10 | 6  | 25  | 48.944 | 1270400000 | 1755700000 | 1653400000 | 1234000000  | 1722800000  | 1435300000 |
| sp P56556 NDUFA6  | sp P56556 | 1 | 2  | 2  | 2  | 15  | 15.136 | 179440000  | 210030000  | 160910000  | 177640000   | 167180000   | 172150000  |

|                   |           |   |    |    |    |     |        |            |            |            |             |             |            |
|-------------------|-----------|---|----|----|----|-----|--------|------------|------------|------------|-------------|-------------|------------|
| sp P56589 PEX3    | sp P56589 | 1 | 2  | 2  | 2  | 9.7 | 42.139 | 32779000   | 24866000   | 0          | 0           | 22189000    | 24014000   |
| sp P56945 BCAR1   | sp P56945 | 1 | 6  | 6  | 6  | 11  | 93.371 | 141560000  | 0          | 113170000  | 0           | 0           | 97232000   |
| sp P57076 CFAP298 | sp P57076 | 1 | 2  | 2  | 2  | 14  | 33.224 | 0          | 0          | 0          | 0           | 61503000    | 0          |
| sp P57081 WDR4    | sp P57081 | 1 | 2  | 2  | 2  | 8   | 45.489 | 0          | 0          | 166650000  | 198440000   | 108630000   | 135840000  |
| sp P57088 TMEM33  | sp P57088 | 1 | 5  | 5  | 5  | 19  | 27.978 | 818710000  | 1099200000 | 944420000  | 1094800000  | 1048500000  | 984400000  |
| sp P57678 GEMIN4  | sp P57678 | 1 | 9  | 9  | 9  | 14  | 120.04 | 283060000  | 470350000  | 321990000  | 319040000   | 303320000   | 323050000  |
| sp P57740 NUP107  | sp P57740 | 1 | 11 | 11 | 11 | 19  | 106.37 | 512760000  | 407960000  | 542360000  | 487440000   | 725410000   | 521220000  |
| sp P57772 EEFSEC  | sp P57772 | 1 | 1  | 1  | 1  | 2.2 | 65.304 | 0          | 0          | 0          | 0           | 83028000    | 0          |
| sp P58107 EPPK1   | sp P58107 | 1 | 93 | 85 | 85 | 52  | 555.65 | 1.2122E+10 | 1.2203E+10 | 1.1758E+10 | 13131000000 | 13018000000 | 1.3608E+10 |
| sp P58546 MTPN    | sp P58546 | 1 | 5  | 5  | 5  | 58  | 12.895 | 1908800000 | 2420100000 | 2200200000 | 1794900000  | 2195600000  | 2197500000 |
| sp P59998 ARPC4   | sp P59998 | 1 | 5  | 5  | 5  | 36  | 19.667 | 2747500000 | 2442100000 | 2393400000 | 2216900000  | 2070600000  | 2710900000 |
| sp P60002 ELOF1   | sp P60002 | 1 | 1  | 1  | 1  | 22  | 9.4618 | 0          | 113780000  | 0          | 0           | 180750000   | 0          |
| sp P60033 CD81    | sp P60033 | 1 | 3  | 3  | 3  | 25  | 25.809 | 311350000  | 341470000  | 0          | 177260000   | 0           | 284100000  |
| sp P60059 SEC61G  | sp P60059 | 1 | 2  | 2  | 2  | 37  | 7.7412 | 710120000  | 380960000  | 335730000  | 1021300000  | 1128100000  | 1086400000 |
| sp P60174 TPI1    | sp P60174 | 1 | 18 | 18 | 18 | 74  | 30.791 | 6.0919E+10 | 6.1797E+10 | 6.5101E+10 | 61314000000 | 64455000000 | 6.8415E+10 |
| sp P60228 EIF3E   | sp P60228 | 1 | 18 | 18 | 18 | 44  | 52.22  | 3877800000 | 3505200000 | 3865100000 | 3274500000  | 3935500000  | 3861600000 |
| sp P60468 SEC61B  | sp P60468 | 1 | 3  | 3  | 3  | 38  | 9.9743 | 2155300000 | 1604100000 | 1449300000 | 1916000000  | 1736300000  | 2364500000 |
| sp P60510 PPP4C   | sp P60510 | 1 | 4  | 3  | 3  | 21  | 35.08  | 251890000  | 266260000  | 224770000  | 258960000   | 254720000   | 214980000  |
| sp P60602 ROMO1   | sp P60602 | 1 | 1  | 1  | 1  | 22  | 8.1828 | 0          | 0          | 0          | 0           | 0           | 482150000  |
| sp P60604 UBE2G2  | sp P60604 | 1 | 2  | 2  | 2  | 22  | 18.566 | 0          | 168130000  | 177290000  | 161000000   | 213330000   | 0          |
| sp P60660 MYL6    | sp P60660 | 1 | 8  | 8  | 6  | 56  | 16.93  | 1.6941E+10 | 1.7356E+10 | 1.4107E+10 | 14291000000 | 18151000000 | 1.4657E+10 |
| sp P60709 ACTB    | sp P60709 | 2 | 24 | 1  | 1  | 77  | 41.736 | 0          | 0          | 0          | 0           | 8390700000  | 0          |
| sp P60842 EIF4A1  | sp P60842 | 1 | 26 | 26 | 14 | 72  | 46.153 | 4.1585E+10 | 3.7143E+10 | 4.5889E+10 | 42068000000 | 41957000000 | 4.5046E+10 |
| sp P60866 RPS20   | sp P60866 | 1 | 3  | 3  | 3  | 25  | 13.373 | 6568700000 | 7868200000 | 6843300000 | 5980000000  | 7279900000  | 8539200000 |
| sp P60891 PRPS1   | sp P60891 | 1 | 13 | 13 | 4  | 44  | 34.834 | 3338600000 | 3619400000 | 3320000000 | 3607200000  | 3141600000  | 3291700000 |
| sp P60900 PSMA6   | sp P60900 | 1 | 13 | 13 | 13 | 59  | 27.399 | 6760000000 | 5409500000 | 6393300000 | 5665400000  | 6382100000  | 6699000000 |
| sp P60903 S100A10 | sp P60903 | 1 | 4  | 4  | 4  | 36  | 11.203 | 9380300000 | 5107000000 | 4583100000 | 6254500000  | 7660400000  | 6784600000 |
| sp P60953 CDC42   | sp P60953 | 3 | 8  | 7  | 7  | 48  | 21.258 | 4029500000 | 5337300000 | 4256900000 | 4363300000  | 4271200000  | 4059400000 |
| sp P60981 DSTN    | sp P60981 | 1 | 14 | 13 | 13 | 69  | 18.506 | 7519800000 | 6181600000 | 6539900000 | 5503300000  | 5393300000  | 5815900000 |
| sp P60983 GMFB    | sp P60983 | 2 | 5  | 5  | 5  | 49  | 16.713 | 519720000  | 627040000  | 554340000  | 569570000   | 627210000   | 634780000  |
| sp P61006 RAB8A   | sp P61006 | 4 | 9  | 7  | 5  | 37  | 23.668 | 971810000  | 828610000  | 986070000  | 736110000   | 845580000   | 830860000  |
| sp P61009 SPCS3   | sp P61009 | 1 | 3  | 3  | 3  | 18  | 20.313 | 319910000  | 384670000  | 292220000  | 350530000   | 440130000   | 541640000  |
| sp P61011 SRP54   | sp P61011 | 1 | 15 | 15 | 15 | 38  | 55.704 | 1018300000 | 980060000  | 1044000000 | 1136500000  | 1114800000  | 886430000  |
| sp P61019 RAB2A   | sp P61019 | 1 | 12 | 12 | 7  | 59  | 23.545 | 2473100000 | 2451400000 | 2252400000 | 2146500000  | 1968700000  | 2232000000 |
| sp P61020 RAB5B   | sp P61020 | 1 | 6  | 3  | 3  | 33  | 23.707 | 249860000  | 221560000  | 0          | 247550000   | 262250000   | 208510000  |
| sp P61024 CKS1B   | sp P61024 | 1 | 2  | 2  | 2  | 33  | 9.6601 | 372180000  | 386560000  | 269160000  | 458920000   | 476380000   | 355620000  |
| sp P61026 RAB10   | sp P61026 | 1 | 11 | 11 | 10 | 45  | 22.541 | 3735000000 | 5148500000 | 4123100000 | 3599800000  | 4266600000  | 4975200000 |
| sp P61073 CXCR4   | sp P61073 | 1 | 3  | 3  | 3  | 11  | 39.745 | 170010000  | 0          | 168340000  | 198500000   | 144860000   | 0          |
| sp P61077 UBE2D3  | sp P61077 | 2 | 3  | 3  | 3  | 29  | 16.687 | 742990000  | 607590000  | 2131400000 | 1294900000  | 1041400000  | 838620000  |



|                   |           |   |    |    |    |     |        |            |            |            |             |             |            |
|-------------------|-----------|---|----|----|----|-----|--------|------------|------------|------------|-------------|-------------|------------|
| sp P61081 UBE2M   | sp P61081 | 1 | 7  | 7  | 7  | 42  | 20.9   | 1612400000 | 1844300000 | 1260200000 | 1786700000  | 2194300000  | 2244300000 |
| sp P61086 UBE2K   | sp P61086 | 1 | 9  | 9  | 9  | 50  | 22.406 | 1515800000 | 1478700000 | 1532900000 | 1277900000  | 1444400000  | 1402900000 |
| sp P61088 UBE2N   | sp P61088 | 2 | 7  | 7  | 7  | 52  | 17.138 | 3670500000 | 3410900000 | 4160700000 | 3369600000  | 3005200000  | 3607200000 |
| sp P61106 RAB14   | sp P61106 | 1 | 14 | 14 | 14 | 73  | 23.897 | 4988700000 | 5029900000 | 5437900000 | 5108100000  | 5089000000  | 6117300000 |
| sp P61158 ACTR3   | sp P61158 | 3 | 21 | 21 | 21 | 60  | 47.371 | 8464400000 | 8021200000 | 9136400000 | 8474800000  | 8308400000  | 9012200000 |
| sp P61160 ACTR2   | sp P61160 | 1 | 10 | 10 | 10 | 29  | 44.76  | 4741900000 | 5640000000 | 5185200000 | 4254600000  | 4002400000  | 5707900000 |
| sp P61163 ACTR1A  | sp P61163 | 1 | 10 | 10 | 5  | 33  | 42.613 | 1407000000 | 1275800000 | 1261900000 | 1476300000  | 1484400000  | 1240500000 |
| sp P61165 TMEM258 | sp P61165 | 1 | 1  | 1  | 1  | 10  | 9.0788 | 184270000  | 194190000  | 162460000  | 194250000   | 0           | 209750000  |
| sp P61201 COPS2   | sp P61201 | 1 | 15 | 15 | 15 | 42  | 51.596 | 1509200000 | 1296600000 | 1379300000 | 1287900000  | 1434900000  | 1333400000 |
| sp P84077 ARF1    | sp P84077 | 2 | 10 | 6  | 5  | 59  | 20.697 | 2593500000 | 4005200000 | 3152700000 | 3568600000  | 3077000000  | 3052000000 |
| sp P61221 ABCE1   | sp P61221 | 1 | 19 | 19 | 19 | 41  | 67.314 | 4052300000 | 3578200000 | 3700600000 | 3483800000  | 3149700000  | 3885700000 |
| sp P61224 RAP1B   | sp P61224 | 2 | 9  | 9  | 5  | 52  | 20.825 | 1956300000 | 2608500000 | 3366100000 | 3207700000  | 2818600000  | 2582200000 |
| sp P61225 RAP2B   | sp P61225 | 1 | 5  | 3  | 3  | 40  | 20.504 | 62561000   | 109610000  | 82498000   | 67249000    | 94629000    | 106480000  |
| sp P61247 RPS3A   | sp P61247 | 1 | 16 | 16 | 16 | 57  | 29.945 | 1.9523E+10 | 1.8443E+10 | 1.9257E+10 | 22757000000 | 25360000000 | 2.1682E+10 |
| sp P61254 RPL26   | sp P61254 | 1 | 9  | 9  | 2  | 45  | 17.258 | 1.1682E+10 | 1.1293E+10 | 1.1751E+10 | 11707000000 | 13566000000 | 1.2563E+10 |
| sp P61289 PSME3   | sp P61289 | 1 | 12 | 12 | 12 | 56  | 29.506 | 2950200000 | 2832200000 | 2635600000 | 2649800000  | 2959200000  | 2932100000 |
| sp P61313 RPL15   | sp P61313 | 1 | 10 | 10 | 10 | 40  | 24.146 | 1.0722E+10 | 1.1382E+10 | 1.0537E+10 | 11610000000 | 12260000000 | 1.3771E+10 |
| sp P61326 MAGOH   | sp P61326 | 1 | 4  | 1  | 1  | 31  | 17.163 | 106550000  | 114800000  | 109690000  | 126580000   | 184540000   | 155630000  |
| sp P61353 RPL27   | sp P61353 | 1 | 5  | 5  | 5  | 43  | 15.798 | 1.0451E+10 | 1.0384E+10 | 1.305E+10  | 8705000000  | 11897000000 | 1.1354E+10 |
| sp P61421 ATP6V0D | sp P61421 | 1 | 7  | 7  | 7  | 29  | 40.329 | 636840000  | 917800000  | 634200000  | 923130000   | 617420000   | 596460000  |
| sp P61457 PCBD1   | sp P61457 | 1 | 3  | 3  | 3  | 36  | 11.999 | 0          | 0          | 282950000  | 236570000   | 0           | 152780000  |
| sp P61513 RPL37A  | sp P61513 | 2 | 4  | 4  | 4  | 50  | 10.275 | 2483300000 | 1524300000 | 2392700000 | 3013400000  | 2184900000  | 2438000000 |
| sp P61586 RHOA    | sp P61586 | 1 | 9  | 9  | 4  | 51  | 21.768 | 4685800000 | 4202900000 | 4470900000 | 4003400000  | 4308400000  | 4624800000 |
| sp P61587 RND3    | sp P61587 | 1 | 1  | 1  | 1  | 5.7 | 27.368 | 0          | 0          | 0          | 0           | 0           | 60259000   |
| sp P61599 NAA20   | sp P61599 | 1 | 1  | 1  | 1  | 6.2 | 20.368 | 0          | 0          | 0          | 0           | 17996000    | 0          |
| sp P61604 HSPE1   | sp P61604 | 1 | 10 | 10 | 10 | 70  | 10.932 | 2.1732E+10 | 2.4509E+10 | 2.0763E+10 | 20996000000 | 21482000000 | 2.4162E+10 |
| sp P61619 SEC61A1 | sp P61619 | 2 | 8  | 8  | 8  | 16  | 52.264 | 2093000000 | 2074400000 | 1664300000 | 1982600000  | 1938200000  | 2098400000 |
| sp P61758 VBP1    | sp P61758 | 1 | 9  | 9  | 9  | 49  | 22.658 | 999560000  | 956980000  | 1195100000 | 1114000000  | 1332000000  | 1040800000 |
| sp P61764 STXBP1  | sp P61764 | 1 | 9  | 9  | 9  | 20  | 67.568 | 279260000  | 384280000  | 313990000  | 287450000   | 331280000   | 284280000  |
| sp P61769 B2M     | sp P61769 | 1 | 3  | 3  | 3  | 35  | 13.714 | 2975600000 | 2778500000 | 3650800000 | 2766200000  | 2849400000  | 1437000000 |
| sp P61803 DAD1    | sp P61803 | 1 | 4  | 4  | 4  | 35  | 12.497 | 1363500000 | 1471100000 | 1199000000 | 1889900000  | 1795600000  | 1504900000 |
| sp P61916 NPC2    | sp P61916 | 1 | 2  | 2  | 2  | 21  | 16.57  | 130410000  | 202110000  | 135670000  | 171940000   | 0           | 204370000  |
| sp P61923 COPZ1   | sp P61923 | 1 | 4  | 4  | 4  | 33  | 20.198 | 939280000  | 1200800000 | 976650000  | 886510000   | 1363100000  | 765380000  |
| sp P61956 SUMO2   | sp P61956 | 1 | 2  | 1  | 1  | 23  | 10.871 | 0          | 0          | 0          | 0           | 0           | 1578600000 |
| sp P61960 UFM1    | sp P61960 | 1 | 3  | 3  | 3  | 59  | 9.1175 | 686450000  | 720050000  | 702010000  | 747580000   | 841210000   | 646090000  |
| sp P61962 DCAF7   | sp P61962 | 1 | 2  | 2  | 2  | 6.7 | 38.926 | 0          | 0          | 0          | 0           | 0           | 82367000   |
| sp P61964 WDR5    | sp P61964 | 1 | 6  | 6  | 6  | 25  | 36.588 | 576900000  | 498870000  | 563880000  | 489930000   | 600130000   | 559550000  |
| sp P61966 AP1S1   | sp P61966 | 1 | 3  | 3  | 2  | 21  | 18.733 | 161230000  | 129790000  | 159290000  | 147270000   | 159520000   | 141940000  |
| sp P61970 NUTF2   | sp P61970 | 1 | 6  | 6  | 6  | 75  | 14.478 | 1817200000 | 1586100000 | 1911500000 | 1329300000  | 1982100000  | 1508700000 |

|                   |           |   |    |    |    |     |        |            |            |            |             |             |            |
|-------------------|-----------|---|----|----|----|-----|--------|------------|------------|------------|-------------|-------------|------------|
| sp P61978 HNRNPK  | sp P61978 | 1 | 22 | 22 | 22 | 59  | 50.976 | 4.3873E+10 | 3.8136E+10 | 4.1403E+10 | 43797000000 | 40864000000 | 4.0947E+10 |
| sp P61987 YWHAG   | sp P61987 | 1 | 13 | 10 | 10 | 60  | 28.302 | 1.0082E+10 | 1.0815E+10 | 1.0879E+10 | 10319000000 | 10482000000 | 1.1413E+10 |
| sp P62070 RRAS2   | sp P62070 | 1 | 3  | 3  | 2  | 20  | 23.399 | 261080000  | 188280000  | 226950000  | 276270000   | 326950000   | 379280000  |
| sp P62072 TIMM10  | sp P62072 | 1 | 1  | 1  | 1  | 14  | 10.333 | 0          | 0          | 0          | 0           | 0           | 88787000   |
| sp P62081 RPS7    | sp P62081 | 1 | 10 | 10 | 10 | 63  | 22.127 | 1.0865E+10 | 1.2382E+10 | 1.0487E+10 | 11558000000 | 10675000000 | 1.1845E+10 |
| sp P62136 PPP1CA  | sp P62136 | 1 | 17 | 17 | 6  | 62  | 37.512 | 6913900000 | 7349700000 | 6792700000 | 6631300000  | 7340100000  | 5562700000 |
| sp P62140 PPP1CB  | sp P62140 | 1 | 16 | 6  | 6  | 60  | 37.186 | 1486500000 | 1440300000 | 968580000  | 1035600000  | 1036500000  | 1498700000 |
| sp P62166 NCS1    | sp P62166 | 1 | 2  | 2  | 2  | 14  | 21.878 | 24567000   | 45622000   | 0          | 0           | 56620000    | 0          |
| sp P62197 PSMC1   | sp P62197 | 1 | 20 | 20 | 20 | 56  | 49.184 | 2985600000 | 3746100000 | 3049000000 | 2695000000  | 3147200000  | 3516200000 |
| sp P62195 PSMC5   | sp P62195 | 1 | 24 | 24 | 23 | 62  | 45.626 | 3373600000 | 3697100000 | 3465600000 | 3373300000  | 3462200000  | 3952100000 |
| sp P62247 RPS8    | sp P62247 | 1 | 10 | 10 | 10 | 50  | 24.205 | 1.58E+10   | 1.5116E+10 | 1.5498E+10 | 16745000000 | 14572000000 | 1.6385E+10 |
| sp P62244 RPS15A  | sp P62244 | 1 | 6  | 6  | 6  | 42  | 14.839 | 6311300000 | 7099600000 | 6666200000 | 6004600000  | 5696500000  | 4610300000 |
| sp P62249 RPS16   | sp P62249 | 1 | 10 | 10 | 10 | 54  | 16.445 | 1.0735E+10 | 9555800000 | 9950900000 | 10253000000 | 12303000000 | 1.0767E+10 |
| sp P62253 UBE2G1  | sp P62253 | 1 | 3  | 3  | 3  | 24  | 19.509 | 159130000  | 153290000  | 90803000   | 88652000    | 157300000   | 91356000   |
| sp P62256 UBE2H   | sp P62256 | 1 | 5  | 5  | 5  | 31  | 20.655 | 502660000  | 773160000  | 540810000  | 758830000   | 584460000   | 642390000  |
| sp P62258 YWHAE   | sp P62258 | 1 | 20 | 20 | 18 | 73  | 29.174 | 4.3429E+10 | 4.5376E+10 | 4.6188E+10 | 38810000000 | 46200000000 | 3.8586E+10 |
| sp P62263 RPS14   | sp P62263 | 1 | 6  | 6  | 6  | 38  | 16.273 | 1.4284E+10 | 1.3751E+10 | 1.6034E+10 | 16320000000 | 15757000000 | 1.5319E+10 |
| sp P62266 RPS23   | sp P62266 | 1 | 6  | 6  | 6  | 48  | 15.807 | 6006600000 | 6313400000 | 6711600000 | 6208100000  | 6920800000  | 5011400000 |
| sp P62269 RPS18   | sp P62269 | 1 | 10 | 10 | 10 | 50  | 17.718 | 1.4756E+10 | 1.578E+10  | 1.4473E+10 | 15965000000 | 15452000000 | 1.2791E+10 |
| sp P62273 RPS29   | sp P62273 | 1 | 4  | 4  | 4  | 48  | 6.6767 | 2076400000 | 2088100000 | 2550600000 | 2231600000  | 2455400000  | 1105800000 |
| sp P62277 RPS13   | sp P62277 | 1 | 10 | 10 | 10 | 57  | 17.222 | 7059800000 | 6722100000 | 8138900000 | 7693100000  | 7158400000  | 7084400000 |
| sp P62280 RPS11   | sp P62280 | 1 | 13 | 13 | 13 | 61  | 18.431 | 1.3892E+10 | 1.2582E+10 | 1.4698E+10 | 12316000000 | 13708000000 | 1.4497E+10 |
| sp P62304 SNRPE   | sp P62304 | 1 | 3  | 3  | 3  | 52  | 10.803 | 943720000  | 1078400000 | 911230000  | 1428700000  | 1042800000  | 459070000  |
| sp P62306 SNRPF   | sp P62306 | 1 | 2  | 2  | 2  | 24  | 9.7251 | 986430000  | 700980000  | 924470000  | 903590000   | 977750000   | 971630000  |
| sp P62310 LSM3    | sp P62310 | 1 | 3  | 3  | 3  | 40  | 11.845 | 474930000  | 495870000  | 540830000  | 373250000   | 476520000   | 365740000  |
| sp P62312 LSM6    | sp P62312 | 1 | 2  | 2  | 2  | 20  | 9.1275 | 103530000  | 165860000  | 121780000  | 0           | 0           | 140340000  |
| sp P62314 SNRPD1  | sp P62314 | 1 | 5  | 5  | 5  | 55  | 13.281 | 2709400000 | 2547600000 | 2030600000 | 2853400000  | 3340500000  | 1236600000 |
| sp P62316 SNRPD2  | sp P62316 | 1 | 9  | 9  | 9  | 68  | 13.527 | 4841700000 | 4954800000 | 4060200000 | 4234600000  | 4080100000  | 4450000000 |
| sp P62318 SNRPD3  | sp P62318 | 1 | 5  | 5  | 5  | 53  | 13.916 | 5542300000 | 5650400000 | 3688200000 | 5461100000  | 6253400000  | 5093200000 |
| sp P62328 TMSB4X  | sp P62328 | 1 | 3  | 3  | 3  | 61  | 5.0526 | 7391200000 | 1.1112E+10 | 7958500000 | 6865200000  | 11891000000 | 1.2451E+10 |
| sp P62330 ARF6    | sp P62330 | 1 | 4  | 4  | 4  | 42  | 20.082 | 605270000  | 583550000  | 616660000  | 572480000   | 837910000   | 555470000  |
| sp P62333 PSMC6   | sp P62333 | 1 | 19 | 19 | 19 | 59  | 44.172 | 4912800000 | 4274700000 | 4054800000 | 4288500000  | 3622400000  | 3683900000 |
| sp P62347 SELENO1 | sp P62347 | 1 | 1  | 1  | 1  | 6.7 | 22.324 | 0          | 0          | 0          | 0           | 0           | 81364000   |
| sp P62380 TBPL1   | sp P62380 | 1 | 1  | 1  | 1  | 10  | 20.886 | 0          | 0          | 0          | 0           | 0           | 70557000   |
| sp P62424 RPL7A   | sp P62424 | 1 | 17 | 17 | 17 | 45  | 29.995 | 2.0922E+10 | 2.1169E+10 | 1.873E+10  | 18758000000 | 21877000000 | 2.1432E+10 |
| sp P62495 ETF1    | sp P62495 | 1 | 17 | 17 | 17 | 46  | 49.03  | 4072900000 | 4792300000 | 4502900000 | 4080400000  | 4123500000  | 4192200000 |
| sp P62633 CNBP    | sp P62633 | 1 | 7  | 7  | 7  | 48  | 19.463 | 4248600000 | 5170600000 | 4261000000 | 4045600000  | 5299200000  | 4013500000 |
| sp P62707 RPS4X   | sp P62707 | 3 | 17 | 17 | 17 | 59  | 29.597 | 1.5438E+10 | 1.7146E+10 | 1.4746E+10 | 17161000000 | 17509000000 | 1.7955E+10 |
| sp P62745 RHOB    | sp P62745 | 1 | 3  | 2  | 2  | 20  | 22.123 | 0          | 0          | 0          | 72837000    | 0           | 0          |

|           |          |           |   |    |    |    |    |        |            |            |            |             |             |            |
|-----------|----------|-----------|---|----|----|----|----|--------|------------|------------|------------|-------------|-------------|------------|
| sp P62750 | RPL23A   | sp P62750 | 2 | 9  | 9  | 9  | 39 | 17.695 | 1.053E+10  | 1.2696E+10 | 1.0414E+10 | 11108000000 | 13349000000 | 1.1626E+10 |
| sp P62753 | RPS6     | sp P62753 | 1 | 7  | 7  | 7  | 29 | 28.68  | 6551400000 | 1.0523E+10 | 7535800000 | 7476300000  | 8610800000  | 9898300000 |
| sp P62805 | HIST1H4A | sp P62805 | 1 | 11 | 11 | 11 | 60 | 11.367 | 1.6528E+11 | 1.118E+11  | 1.96E+11   | 1.8663E+11  | 2.1603E+11  | 1.924E+11  |
| sp P62820 | RAB1A    | sp P62820 | 1 | 10 | 5  | 5  | 54 | 22.677 | 1533900000 | 1605300000 | 1770000000 | 1832700000  | 1953600000  | 1885100000 |
| sp P62826 | RAN      | sp P62826 | 1 | 12 | 12 | 12 | 57 | 24.423 | 2.2022E+10 | 1.9252E+10 | 2.5163E+10 | 20972000000 | 18342000000 | 2.1106E+10 |
| sp P62829 | RPL23    | sp P62829 | 1 | 7  | 7  | 7  | 62 | 14.865 | 1.2925E+10 | 1.1562E+10 | 1.1278E+10 | 12597000000 | 13662000000 | 1.184E+10  |
| sp P62834 | RAP1A    | sp P62834 | 1 | 7  | 3  | 3  | 45 | 20.987 | 171250000  | 0          | 183160000  | 201210000   | 289950000   | 242610000  |
| sp P62841 | RPS15    | sp P62841 | 1 | 3  | 3  | 3  | 22 | 17.04  | 1608600000 | 2351900000 | 2251300000 | 1604800000  | 1551000000  | 1510100000 |
| sp P62847 | RPS24    | sp P62847 | 1 | 4  | 4  | 4  | 26 | 15.423 | 2653500000 | 3370600000 | 2483000000 | 2766100000  | 4136200000  | 3340800000 |
| sp P62851 | RPS25    | sp P62851 | 1 | 5  | 5  | 5  | 30 | 13.742 | 6159300000 | 7139900000 | 5301200000 | 5654300000  | 7876000000  | 7442600000 |
| sp P62854 | RPS26    | sp P62854 | 2 | 3  | 3  | 3  | 31 | 13.015 | 4246200000 | 3759200000 | 3383900000 | 3993000000  | 5111500000  | 2593000000 |
| sp P62857 | RPS28    | sp P62857 | 1 | 2  | 2  | 2  | 30 | 7.8409 | 3221200000 | 4389000000 | 3660800000 | 3937600000  | 4721200000  | 4424300000 |
| sp P62861 | FAU      | sp P62861 | 1 | 1  | 1  | 1  | 17 | 6.6478 | 0          | 0          | 0          | 0           | 0           | 1676000000 |
| sp P62873 | GNB1     | sp P62873 | 1 | 13 | 13 | 8  | 58 | 37.377 | 3089800000 | 2892500000 | 2637300000 | 2609900000  | 2761600000  | 2717600000 |
| sp P62877 | RBX1     | sp P62877 | 1 | 2  | 2  | 2  | 24 | 12.274 | 0          | 516070000  | 0          | 0           | 480030000   | 0          |
| sp P62879 | GNB2     | sp P62879 | 1 | 12 | 8  | 5  | 45 | 37.331 | 1623500000 | 2139700000 | 1993600000 | 1207300000  | 1391300000  | 1399600000 |
| sp P62888 | RPL30    | sp P62888 | 1 | 7  | 7  | 7  | 67 | 12.784 | 1.1512E+10 | 1.1591E+10 | 1.4024E+10 | 11210000000 | 12568000000 | 1.368E+10  |
| sp Q59GN  | RPL39P5  | sp Q59GN  | 2 | 1  | 1  | 1  | 20 | 6.3225 | 0          | 0          | 0          | 0           | 0           | 147470000  |
| sp P62899 | RPL31    | sp P62899 | 1 | 5  | 5  | 5  | 37 | 14.463 | 5391100000 | 5851700000 | 6023000000 | 5472700000  | 4954200000  | 4905900000 |
| sp P62906 | RPL10A   | sp P62906 | 1 | 9  | 9  | 9  | 39 | 24.831 | 1.2891E+10 | 1.1658E+10 | 1.4096E+10 | 11657000000 | 13390000000 | 1.2335E+10 |
| sp P62910 | RPL32    | sp P62910 | 1 | 7  | 7  | 7  | 53 | 15.86  | 5528700000 | 4347800000 | 6200500000 | 5245800000  | 5076200000  | 5204500000 |
| sp P62913 | RPL11    | sp P62913 | 1 | 8  | 8  | 8  | 46 | 20.252 | 9182700000 | 1.0614E+10 | 9142300000 | 10443000000 | 10863000000 | 9525600000 |
| sp P62917 | RPL8     | sp P62917 | 1 | 12 | 12 | 12 | 55 | 28.024 | 1.2941E+10 | 1.2483E+10 | 1.1295E+10 | 12277000000 | 12723000000 | 1.5852E+10 |
| sp P62937 | PPIA     | sp P62937 | 1 | 12 | 12 | 10 | 70 | 18.012 | 6.4379E+10 | 7.9933E+10 | 7.6037E+10 | 78488000000 | 76169000000 | 6.7106E+10 |
| sp P62942 | FKBP1A   | sp P62942 | 1 | 6  | 6  | 6  | 42 | 11.951 | 2211600000 | 1946700000 | 2592500000 | 2033600000  | 2223700000  | 2082700000 |
| sp P62979 | RPS27A   | sp P62979 | 4 | 8  | 8  | 8  | 51 | 17.965 | 4.1625E+10 | 4.0177E+10 | 3.5724E+10 | 44417000000 | 46107000000 | 5.5279E+10 |
| sp P62993 | GRB2     | sp P62993 | 1 | 7  | 7  | 7  | 45 | 25.206 | 373770000  | 340950000  | 531010000  | 472260000   | 614790000   | 428620000  |
| sp P62995 | TRA2B    | sp P62995 | 1 | 7  | 7  | 6  | 30 | 33.665 | 1221600000 | 1034700000 | 1166300000 | 1326200000  | 1476000000  | 1366800000 |
| sp P63000 | RAC1     | sp P63000 | 2 | 8  | 7  | 4  | 44 | 21.45  | 2916200000 | 2801900000 | 2467500000 | 2325400000  | 2274100000  | 2227900000 |
| sp P63010 | AP2B1    | sp P63010 | 1 | 27 | 27 | 17 | 42 | 104.55 | 3937100000 | 4220000000 | 3722800000 | 4143200000  | 4350300000  | 3860100000 |
| sp P63092 | GNAS     | sp P63092 | 3 | 9  | 8  | 8  | 34 | 45.664 | 666070000  | 565650000  | 465340000  | 612090000   | 596460000   | 565700000  |
| sp P63096 | GNAI1    | sp P63096 | 5 | 10 | 5  | 5  | 40 | 40.361 | 331510000  | 343920000  | 278590000  | 320870000   | 374060000   | 364440000  |
| sp P63098 | PPP3R1   | sp P63098 | 1 | 5  | 5  | 5  | 49 | 19.3   | 118510000  | 187470000  | 156400000  | 99870000    | 118790000   | 115790000  |
| sp P63104 | YWHAZ    | sp P63104 | 1 | 17 | 15 | 13 | 70 | 27.745 | 4.5409E+10 | 4.1377E+10 | 4.1346E+10 | 45431000000 | 52732000000 | 4.3723E+10 |
| sp P63151 | PPP2R2A  | sp P63151 | 4 | 12 | 12 | 12 | 36 | 51.691 | 1184300000 | 1238100000 | 1549000000 | 1427000000  | 1140600000  | 1193600000 |
| sp P63165 | SUMO1    | sp P63165 | 1 | 4  | 4  | 4  | 43 | 11.557 | 798910000  | 637300000  | 962700000  | 782590000   | 967190000   | 565770000  |
| sp P63167 | DYNLL1   | sp P63167 | 1 | 4  | 4  | 2  | 57 | 10.366 | 2127800000 | 3084500000 | 2011200000 | 2024000000  | 2385800000  | 3084900000 |
| sp P63172 | DYNLT1   | sp P63172 | 1 | 3  | 3  | 3  | 50 | 12.452 | 77058000   | 0          | 250510000  | 285150000   | 385130000   | 294610000  |
| sp P63173 | RPL38    | sp P63173 | 1 | 6  | 6  | 6  | 50 | 8.2178 | 2265100000 | 2583700000 | 1857500000 | 2232300000  | 1888100000  | 1954700000 |

|                    |           |   |    |     |    |     |        |            |            |            |             |             |            |
|--------------------|-----------|---|----|-----|----|-----|--------|------------|------------|------------|-------------|-------------|------------|
| sp P63208 SKP1     | sp P63208 | 1 | 10 | 10  | 10 | 62  | 18.658 | 3271100000 | 2750800000 | 3097200000 | 2917100000  | 3406300000  | 3061300000 |
| sp P63218 GNG5     | sp P63218 | 1 | 2  | 2   | 2  | 53  | 7.3184 | 651020000  | 448540000  | 0          | 499180000   | 0           | 0          |
| sp P63220 RPS21    | sp P63220 | 1 | 5  | 5   | 5  | 59  | 9.1113 | 3960500000 | 3138300000 | 3261400000 | 3641200000  | 5608500000  | 4065400000 |
| sp P63241 EIF5A    | sp P63241 | 3 | 14 | 14  | 14 | 88  | 16.832 | 2.0551E+10 | 2.7881E+10 | 2.6782E+10 | 23835000000 | 29832000000 | 2.6463E+10 |
| sp P63244 RACK1    | sp P63244 | 1 | 19 | 19  | 19 | 75  | 35.076 | 2.9095E+10 | 2.3788E+10 | 2.2997E+10 | 23137000000 | 21900000000 | 2.2763E+10 |
| sp P63261 ACTG1    | sp P63261 | 1 | 25 | 25  | 2  | 77  | 41.792 | 4.7639E+11 | 4.798E+11  | 4.5833E+11 | 4.9364E+11  | 4.5277E+11  | 4.5344E+11 |
| sp P63272 SUPT4H1  | sp P63272 | 1 | 3  | 3   | 3  | 26  | 13.193 | 192240000  | 0          | 0          | 176720000   | 373510000   | 0          |
| sp P63279 UBE2I    | sp P63279 | 1 | 8  | 8   | 8  | 59  | 18.007 | 2449200000 | 3200900000 | 2509800000 | 2114600000  | 2676200000  | 2315800000 |
| sp P63313 TMSB10   | sp P63313 | 1 | 1  | 1   | 1  | 32  | 5.0256 | 0          | 0          | 0          | 0           | 0           | 3396000000 |
| sp P67775 PPP2CA   | sp P67775 | 2 | 11 | 11  | 10 | 52  | 35.594 | 3971300000 | 3846000000 | 3828800000 | 3951000000  | 4030800000  | 4174900000 |
| sp P67809 YBX1     | sp P67809 | 2 | 14 | 14  | 10 | 66  | 35.924 | 1.445E+10  | 1.2048E+10 | 1.1093E+10 | 12220000000 | 12837000000 | 1.4205E+10 |
| sp P67812 SEC11A   | sp P67812 | 1 | 4  | 4   | 4  | 20  | 20.625 | 277620000  | 460360000  | 310040000  | 408390000   | 313390000   | 370820000  |
| sp P67870 CSNK2B   | sp P67870 | 1 | 7  | 7   | 7  | 41  | 24.942 | 1618300000 | 1923400000 | 1732000000 | 1518000000  | 1866800000  | 1729100000 |
| sp P67936 TPM4     | sp P67936 | 2 | 17 | 17  | 9  | 51  | 28.521 | 2.9632E+10 | 2.5656E+10 | 2.8136E+10 | 22862000000 | 26765000000 | 2.6199E+10 |
| sp P68032 ACTC1    | sp P68032 | 4 | 20 | 7   | 7  | 68  | 42.019 | 5.663E+10  | 8.4529E+10 | 7.2001E+10 | 62548000000 | 72128000000 | 5.3062E+10 |
| sp P68036 UBE2L3   | sp P68036 | 2 | 9  | 9   | 9  | 70  | 17.861 | 2151700000 | 2321400000 | 3038300000 | 2704800000  | 2479600000  | 3282300000 |
| sp P68104 EEF1A1   | sp P68104 | 2 | 29 | 29  | 18 | 70  | 50.14  | 1.27E+11   | 1.4078E+11 | 1.4961E+11 | 1.3089E+11  | 1.0613E+11  | 1.2766E+11 |
| sp P68363 TUBA1B   | sp P68363 | 1 | 20 | 4   | 0  | 61  | 50.151 | 1.9071E+10 | 1.62E+10   | 1.3236E+10 | 16111000000 | 10682000000 | 1.2465E+10 |
| sp P68366 TUBA4A   | sp P68366 | 1 | 19 | 4   | 4  | 57  | 49.924 | 5411900000 | 6344400000 | 6436400000 | 8933300000  | 5445600000  | 6588900000 |
| sp P68371 TUBB4B   | sp P68371 | 1 | 23 | 23  | 1  | 74  | 49.83  | 1.0327E+11 | 1.0727E+11 | 1.1066E+11 | 97510000000 | 90013000000 | 9.3756E+10 |
| sp P68400 CSNK2A1  | sp P68400 | 2 | 14 | 14  | 14 | 54  | 45.143 | 1097700000 | 1081500000 | 1017800000 | 850300000   | 843900000   | 1033500000 |
| sp P68402 PAFAH1B  | sp P68402 | 1 | 3  | 3   | 3  | 22  | 25.569 | 402090000  | 401630000  | 500340000  | 385060000   | 238620000   | 268300000  |
| sp P68431 HIST1H3A | sp P68431 | 3 | 5  | 5   | 1  | 46  | 15.404 | 3.2676E+10 | 5.6493E+10 | 4.7194E+10 | 52270000000 | 56705000000 | 5.8558E+10 |
| sp P78310 CXADR    | sp P78310 | 1 | 2  | 2   | 2  | 9.3 | 40.029 | 102630000  | 121550000  | 206050000  | 239470000   | 81384000    | 72007000   |
| sp P78316 NOP14    | sp P78316 | 1 | 9  | 9   | 9  | 14  | 97.667 | 377800000  | 470820000  | 516850000  | 0           | 0           | 368930000  |
| sp P78318 IGBP1    | sp P78318 | 1 | 8  | 8   | 8  | 31  | 39.221 | 299750000  | 162340000  | 391660000  | 242360000   | 280040000   | 222010000  |
| sp P78330 PSPH     | sp P78330 | 1 | 7  | 7   | 7  | 33  | 25.007 | 1359100000 | 1339900000 | 1214200000 | 1289300000  | 1372100000  | 1213400000 |
| sp P78344 EIF4G2   | sp P78344 | 1 | 27 | 27  | 27 | 35  | 102.36 | 3906800000 | 3649700000 | 3719000000 | 4524300000  | 3715200000  | 4389700000 |
| sp P78346 RPP30    | sp P78346 | 1 | 8  | 8   | 8  | 43  | 29.321 | 690840000  | 572870000  | 546580000  | 557840000   | 592160000   | 576780000  |
| sp P78347 GTF2I    | sp P78347 | 3 | 24 | 24  | 24 | 32  | 112.42 | 3208900000 | 3111800000 | 2906700000 | 2726600000  | 2861000000  | 2837900000 |
| sp P78357 CNTNAP1  | sp P78357 | 1 | 2  | 2   | 2  | 2.8 | 156.26 | 0          | 0          | 0          | 0           | 0           | 104930000  |
| sp P78362 SRPK2    | sp P78362 | 1 | 4  | 3   | 3  | 9.4 | 77.526 | 0          | 0          | 0          | 0           | 58913000    | 0          |
| sp P78371 CCT2     | sp P78371 | 1 | 34 | 34  | 34 | 71  | 57.488 | 2.1415E+10 | 2.6209E+10 | 2.0747E+10 | 21275000000 | 20974000000 | 2.1106E+10 |
| sp P78381 SLC35A2  | sp P78381 | 1 | 3  | 3   | 3  | 19  | 41.307 | 0          | 0          | 0          | 112130000   | 0           | 0          |
| sp P78406 RAE1     | sp P78406 | 1 | 12 | 12  | 12 | 56  | 40.968 | 960750000  | 1004100000 | 863240000  | 1205300000  | 1173500000  | 945040000  |
| sp P78417 GSTO1    | sp P78417 | 1 | 14 | 14  | 14 | 60  | 27.566 | 2569300000 | 3523000000 | 2982200000 | 2435700000  | 2733400000  | 2978600000 |
| sp P78527 PRKDC    | sp P78527 | 1 | ## | 135 | ## | 37  | 469.08 | 2.6474E+10 | 2.6105E+10 | 2.6624E+10 | 25656000000 | 25089000000 | 2.6518E+10 |
| sp P78537 BLOC1S1  | sp P78537 | 1 | 3  | 3   | 3  | 21  | 17.262 | 0          | 31122000   | 0          | 0           | 0           | 0          |
| sp P80217 IFI35    | sp P80217 | 1 | 2  | 2   | 2  | 8.7 | 31.546 | 65602000   | 59215000   | 68341000   | 80467000    | 81043000    | 85936000   |

|                  |           |   |    |    |    |     |        |           |           |            |             |             |            |
|------------------|-----------|---|----|----|----|-----|--------|-----------|-----------|------------|-------------|-------------|------------|
| sp P80297 MT1X   | sp P80297 | 1 | 3  | 1  | 1  | 54  | 6.0683 | 0         | 0         | 0          | 0           | 0           | 0          |
| sp P80303 NUCB2  | sp P80303 | 1 | 6  | 6  | 6  | 18  | 50.222 | 325040000 | 327600000 | 345320000  | 425990000   | 408110000   | 378240000  |
| sp P80723 BASP1  | sp P80723 | 1 | 15 | 15 | 15 | 85  | 22.693 | 6.122E+10 | 5.717E+10 | 5.1724E+10 | 53602000000 | 55916000000 | 5.3041E+10 |
| sp P82094 TMF1   | sp P82094 | 1 | 2  | 2  | 2  | 2.3 | 122.84 | 0         | 0         | 0          | 0           | 0           | 48908000   |
| sp P82650 MRPS22 | sp P82650 | 1 | 7  | 7  | 7  | 26  | 41.28  | 303760000 | 272610000 | 212030000  | 277740000   | 255620000   | 241670000  |
| sp P82663 MRPS25 | sp P82663 | 1 | 1  | 1  | 1  | 12  | 20.116 | 0         | 0         | 0          | 0           | 0           | 43485000   |
| sp P82664 MRPS10 | sp P82664 | 1 | 1  | 1  | 1  | 9   | 22.999 | 165600000 | 92445000  | 0          | 165220000   | 156680000   | 0          |
| sp P82673 MRPS35 | sp P82673 | 1 | 6  | 6  | 6  | 30  | 36.844 | 289900000 | 240130000 | 261180000  | 256570000   | 245390000   | 175050000  |
| sp P82675 MRPS5  | sp P82675 | 1 | 5  | 5  | 5  | 12  | 48.006 | 166040000 | 201410000 | 240980000  | 198690000   | 263030000   | 0          |
| sp P82909 MRPS36 | sp P82909 | 1 | 5  | 5  | 5  | 69  | 11.466 | 195070000 | 347930000 | 0          | 102890000   | 196980000   | 152720000  |
| sp P82912 MRPS11 | sp P82912 | 1 | 1  | 1  | 1  | 15  | 20.616 | 0         | 0         | 0          | 0           | 0           | 75908000   |
| sp P82921 MRPS21 | sp P82921 | 1 | 1  | 1  | 1  | 16  | 10.688 | 0         | 0         | 0          | 0           | 0           | 42753000   |
| sp P82930 MRPS34 | sp P82930 | 1 | 6  | 6  | 6  | 43  | 25.65  | 336730000 | 411030000 | 283160000  | 256060000   | 338510000   | 339960000  |
| sp P82932 MRPS6  | sp P82932 | 1 | 3  | 3  | 3  | 23  | 14.226 | 209400000 | 198620000 | 198080000  | 187160000   | 0           | 199820000  |
| sp P82933 MRPS9  | sp P82933 | 1 | 9  | 9  | 9  | 31  | 45.834 | 562080000 | 555940000 | 465010000  | 429290000   | 439920000   | 495020000  |
| sp P82970 HMG5   | sp P82970 | 1 | 3  | 3  | 3  | 14  | 31.524 | 429730000 | 309820000 | 0          | 352930000   | 404600000   | 441150000  |
| sp P82979 SARNP  | sp P82979 | 1 | 8  | 8  | 8  | 42  | 23.671 | 399360000 | 279850000 | 384200000  | 352760000   | 327360000   | 384050000  |
| sp P83436 COG7   | sp P83436 | 1 | 4  | 4  | 4  | 6.8 | 86.343 | 0         | 0         | 0          | 0           | 177680000   | 0          |
| sp P83731 RPL24  | sp P83731 | 1 | 5  | 5  | 5  | 31  | 17.779 | 593900000 | 571700000 | 692130000  | 618440000   | 577560000   | 718790000  |
| sp P83876 TXNL4A | sp P83876 | 1 | 5  | 5  | 5  | 38  | 16.786 | 491930000 | 0         | 0          | 0           | 412810000   | 0          |
| sp P83916 CBX1   | sp P83916 | 1 | 4  | 3  | 3  | 40  | 21.418 | 219160000 | 435160000 | 312670000  | 221710000   | 185060000   | 170500000  |
| sp P84085 ARF5   | sp P84085 | 1 | 8  | 3  | 3  | 53  | 20.529 | 592540000 | 619140000 | 738790000  | 626200000   | 657130000   | 874360000  |
| sp P84090 ERH    | sp P84090 | 1 | 4  | 4  | 4  | 44  | 12.259 | 409260000 | 353060000 | 403600000  | 400480000   | 496380000   | 446800000  |
| sp P84095 RHOG   | sp P84095 | 1 | 9  | 9  | 8  | 61  | 21.308 | 125740000 | 108860000 | 116780000  | 123670000   | 118800000   | 123860000  |
| sp P84098 RPL19  | sp P84098 | 1 | 7  | 7  | 7  | 27  | 23.466 | 637550000 | 743760000 | 680710000  | 568190000   | 703020000   | 652420000  |
| sp P84101 SERF2  | sp P84101 | 1 | 3  | 3  | 3  | 31  | 6.8998 | 694640000 | 225460000 | 298150000  | 227450000   | 229150000   | 200360000  |
| sp P84103 SRSF3  | sp P84103 | 1 | 7  | 7  | 6  | 35  | 19.329 | 311780000 | 288820000 | 328580000  | 304880000   | 373780000   | 404100000  |
| sp P84243 H3F3A  | sp P84243 | 1 | 5  | 1  | 1  | 46  | 15.328 | 0         | 0         | 0          | 0           | 0           | 26539000   |
| sp P85037 FOCK1  | sp P85037 | 2 | 2  | 2  | 2  | 1.9 | 75.456 | 145110000 | 112150000 | 146180000  | 135210000   | 105820000   | 131610000  |
| sp P86791 CCZ1   | sp P86791 | 2 | 1  | 1  | 1  | 3.5 | 55.866 | 0         | 0         | 0          | 0           | 0           | 45881000   |
| sp P98082 DAB2   | sp P98082 | 1 | 7  | 7  | 7  | 12  | 82.447 | 542880000 | 463970000 | 547870000  | 333450000   | 364090000   | 563360000  |
| sp P98160 HSPG2  | sp P98160 | 1 | 1  | 1  | 1  | 0.3 | 468.83 | 0         | 0         | 0          | 0           | 0           | 30187000   |
| sp P98175 RBM10  | sp P98175 | 1 | 11 | 11 | 11 | 14  | 103.53 | 283760000 | 290520000 | 283700000  | 260600000   | 362450000   | 283710000  |
| sp P98179 RBM3   | sp P98179 | 1 | 4  | 4  | 4  | 27  | 17.17  | 938500000 | 110450000 | 116960000  | 868440000   | 538980000   | 945850000  |
| sp P98194 ATP2C1 | sp P98194 | 1 | 5  | 5  | 5  | 9.2 | 100.58 | 0         | 208180000 | 0          | 0           | 194130000   | 209260000  |
| sp P99999 CYCS   | sp P99999 | 2 | 7  | 7  | 7  | 56  | 11.749 | 226630000 | 247310000 | 191430000  | 173920000   | 169040000   | 188060000  |
| sp Q0005 TFAM    | sp Q0005  | 1 | 7  | 7  | 7  | 27  | 29.096 | 331230000 | 323390000 | 339940000  | 398080000   | 653190000   | 403810000  |
| sp Q0016 PITPNA  | sp Q0016  | 1 | 6  | 5  | 5  | 34  | 31.806 | 275880000 | 209870000 | 290750000  | 248930000   | 248020000   | 175130000  |
| sp Q0032 SLC25A3 | sp Q0032  | 1 | 12 | 12 | 12 | 32  | 40.094 | 819150000 | 963530000 | 673420000  | 866850000   | 688310000   | 673040000  |

|                  |          |   |    |     |    |     |        |            |            |            |             |             |            |
|------------------|----------|---|----|-----|----|-----|--------|------------|------------|------------|-------------|-------------|------------|
| sp Q0034 HDLBP   | sp Q0034 | 1 | 29 | 29  | 29 | 31  | 141.45 | 2847800000 | 3169500000 | 3139900000 | 3045000000  | 2903200000  | 2724400000 |
| sp Q0040 GTF2B   | sp Q0040 | 1 | 3  | 3   | 3  | 17  | 34.833 | 212630000  | 197610000  | 179060000  | 196910000   | 205780000   | 204080000  |
| sp Q0053 CDK6    | sp Q0053 | 1 | 10 | 10  | 10 | 38  | 36.938 | 829540000  | 623590000  | 648070000  | 584130000   | 494610000   | 527520000  |
| sp Q0053 CDK5    | sp Q0053 | 1 | 2  | 2   | 2  | 8.9 | 33.304 | 46523000   | 62835000   | 62323000   | 64265000    | 61741000    | 63787000   |
| sp Q0057 PURA    | sp Q0057 | 1 | 4  | 4   | 4  | 27  | 34.91  | 347050000  | 472520000  | 294170000  | 284350000   | 363270000   | 329590000  |
| sp Q0058 CDC42EP | sp Q0058 | 1 | 2  | 2   | 2  | 11  | 40.294 | 0          | 0          | 0          | 0           | 0           | 31017000   |
| sp Q0061 CLTC    | sp Q0061 | 2 | 72 | 72  | 72 | 50  | 191.61 | 4.9506E+10 | 4.6891E+10 | 4.6821E+10 | 49507000000 | 43032000000 | 4.6563E+10 |
| sp Q0061 HSF1    | sp Q0061 | 1 | 1  | 1   | 1  | 4   | 57.26  | 0          | 0          | 0          | 47391000    | 49427000    | 0          |
| sp Q0065 NFKB2   | sp Q0065 | 1 | 6  | 6   | 6  | 9.4 | 96.748 | 127020000  | 101770000  | 146450000  | 195410000   | 192640000   | 204170000  |
| sp Q0068 FKBP3   | sp Q0068 | 1 | 8  | 8   | 8  | 44  | 25.177 | 2331700000 | 1591800000 | 2008300000 | 1712500000  | 2217200000  | 2041700000 |
| sp Q0076 REEP5   | sp Q0076 | 1 | 5  | 5   | 5  | 20  | 21.493 | 2174600000 | 2179800000 | 1899600000 | 2128000000  | 2006100000  | 2279900000 |
| sp Q0079 SORD    | sp Q0079 | 1 | 14 | 14  | 14 | 58  | 38.324 | 2480600000 | 2485900000 | 2801300000 | 2536300000  | 2266100000  | 2157500000 |
| sp Q0083 HNRNPU  | sp Q0083 | 1 | 32 | 32  | 32 | 42  | 90.583 | 3.1116E+10 | 3.1115E+10 | 3.252E+10  | 29919000000 | 30156000000 | 3.2734E+10 |
| sp Q0108 SPTBN1  | sp Q0108 | 2 | ## | 107 | ## | 58  | 274.61 | 2.8994E+10 | 2.9165E+10 | 2.8172E+10 | 23424000000 | 22718000000 | 2.5606E+10 |
| sp Q0108 TIAL1   | sp Q0108 | 1 | 8  | 8   | 5  | 33  | 41.59  | 672440000  | 685330000  | 667570000  | 693220000   | 717570000   | 699220000  |
| sp Q0110 SET     | sp Q0110 | 2 | 8  | 8   | 8  | 33  | 33.488 | 1.8853E+10 | 1.7606E+10 | 1.5785E+10 | 16586000000 | 16862000000 | 1.601E+10  |
| sp Q0113 SRSF2   | sp Q0113 | 2 | 6  | 6   | 6  | 29  | 25.476 | 3998100000 | 3814300000 | 3357200000 | 3627700000  | 4458300000  | 3910200000 |
| sp Q0143 AMPD2   | sp Q0143 | 1 | 8  | 8   | 8  | 12  | 100.69 | 245260000  | 243190000  | 258250000  | 233680000   | 201890000   | 219010000  |
| sp Q0146 FABP5   | sp Q0146 | 2 | 10 | 10  | 10 | 72  | 15.164 | 8941700000 | 8540000000 | 6862300000 | 8060100000  | 9357500000  | 8388700000 |
| sp Q0151 CAP1    | sp Q0151 | 1 | 18 | 18  | 17 | 46  | 51.901 | 1.5861E+10 | 1.8562E+10 | 1.6225E+10 | 14792000000 | 15217000000 | 1.9951E+10 |
| sp Q0158 HMGCS1  | sp Q0158 | 2 | 11 | 11  | 11 | 26  | 57.293 | 782280000  | 788900000  | 586790000  | 426270000   | 561680000   | 502940000  |
| sp Q0162 IFITM3  | sp Q0162 | 4 | 3  | 3   | 3  | 49  | 14.632 | 1114100000 | 951350000  | 1347700000 | 1340000000  | 0           | 0          |
| sp Q0165 SLC7A5  | sp Q0165 | 2 | 7  | 7   | 6  | 14  | 55.01  | 4171800000 | 6971500000 | 3686500000 | 4572600000  | 5690800000  | 5252500000 |
| sp Q0165 DR1     | sp Q0165 | 1 | 3  | 3   | 3  | 25  | 19.443 | 409470000  | 426980000  | 373210000  | 286150000   | 447640000   | 458220000  |
| sp Q0166 TFAP4   | sp Q0166 | 1 | 2  | 2   | 2  | 7.4 | 38.725 | 0          | 68567000   | 0          | 0           | 0           | 0          |
| sp Q0178 EXOSC10 | sp Q0178 | 1 | 20 | 20  | 20 | 29  | 100.83 | 1038000000 | 1041000000 | 973990000  | 1067300000  | 1033600000  | 1063300000 |
| sp Q0180 OTUD4   | sp Q0180 | 1 | 3  | 3   | 3  | 4.4 | 124.04 | 0          | 0          | 0          | 0           | 0           | 50018000   |
| sp Q0181 PFKP    | sp Q0181 | 1 | 28 | 28  | 25 | 43  | 85.595 | 1.1414E+10 | 1.0028E+10 | 1.1647E+10 | 11679000000 | 9840200000  | 1.0636E+10 |
| sp Q0183 XPC     | sp Q0183 | 1 | 3  | 3   | 3  | 4.5 | 105.95 | 0          | 0          | 0          | 53071000    | 0           | 0          |
| sp Q0184 EWSR1   | sp Q0184 | 1 | 6  | 6   | 6  | 13  | 68.477 | 1883700000 | 1443400000 | 1636300000 | 1682100000  | 1644700000  | 1166200000 |
| sp Q0196 OCRL    | sp Q0196 | 1 | 1  | 1   | 1  | 2.3 | 104.2  | 0          | 0          | 0          | 0           | 0           | 30669000   |
| sp Q0197 PLCB3   | sp Q0197 | 1 | 12 | 12  | 12 | 15  | 138.8  | 334440000  | 393710000  | 476950000  | 446360000   | 394660000   | 496340000  |
| sp Q0199 TAGLN   | sp Q0199 | 1 | 13 | 13  | 13 | 69  | 22.611 | 4772900000 | 5685100000 | 4215500000 | 3373000000  | 4231100000  | 3768400000 |
| sp Q0641 MEF2C   | sp Q0641 | 3 | 1  | 1   | 1  | 2.3 | 51.221 | 0          | 45540000   | 0          | 0           | 0           | 0          |
| sp Q0212 DHODH   | sp Q0212 | 1 | 3  | 3   | 3  | 11  | 42.867 | 0          | 0          | 121780000  | 115150000   | 0           | 0          |
| sp Q0221 OGDH    | sp Q0221 | 2 | 31 | 31  | 31 | 40  | 115.93 | 2912200000 | 2881400000 | 2672400000 | 2832600000  | 2566100000  | 2571900000 |
| sp Q0224 KIF23   | sp Q0224 | 1 | 10 | 10  | 10 | 17  | 110.06 | 380830000  | 413940000  | 437670000  | 491830000   | 408340000   | 415170000  |
| sp Q0233 BDH1    | sp Q0233 | 1 | 1  | 1   | 1  | 7.6 | 38.157 | 0          | 0          | 0          | 0           | 0           | 23179000   |
| sp Q0238 COL7A1  | sp Q0238 | 1 | 4  | 4   | 4  | 2.7 | 295.22 | 128500000  | 217660000  | 232420000  | 158920000   | 140760000   | 202170000  |

|                   |          |   |    |    |    |     |        |            |            |            |             |             |            |
|-------------------|----------|---|----|----|----|-----|--------|------------|------------|------------|-------------|-------------|------------|
| sp Q0244 SP3      | sp Q0244 | 1 | 2  | 2  | 2  | 5.6 | 81.924 | 0          | 0          | 0          | 0           | 0           | 23296000   |
| sp Q0253 HIST1H1A | sp Q0253 | 1 | 4  | 2  | 2  | 24  | 21.842 | 0          | 0          | 0          | 0           | 186380000   | 0          |
| sp Q0254 RPL18A   | sp Q0254 | 1 | 7  | 7  | 7  | 35  | 20.762 | 7197400000 | 7319200000 | 6705100000 | 7828400000  | 7348600000  | 7899600000 |
| sp Q0275 MAP2K1   | sp Q0275 | 1 | 6  | 4  | 4  | 20  | 43.439 | 524180000  | 552260000  | 524190000  | 515190000   | 573680000   | 589300000  |
| sp Q0279 FKBP4    | sp Q0279 | 1 | 32 | 32 | 32 | 74  | 51.804 | 1.6134E+10 | 1.8775E+10 | 1.8083E+10 | 18458000000 | 18547000000 | 2.0097E+10 |
| sp Q0280 PLOD1    | sp Q0280 | 1 | 18 | 18 | 18 | 34  | 83.549 | 2907100000 | 3243800000 | 3260500000 | 3267700000  | 3064600000  | 2895800000 |
| sp Q0281 NUCB1    | sp Q0281 | 1 | 12 | 12 | 12 | 33  | 53.879 | 856390000  | 1026500000 | 900720000  | 674730000   | 721770000   | 803870000  |
| sp Q0287 RPL6     | sp Q0287 | 1 | 14 | 14 | 14 | 40  | 32.728 | 1.6436E+10 | 1.5707E+10 | 1.5905E+10 | 16765000000 | 16937000000 | 1.6449E+10 |
| sp Q0288 TOP2B    | sp Q0288 | 1 | 22 | 12 | 12 | 15  | 183.26 | 398260000  | 396290000  | 416280000  | 356780000   | 309100000   | 399980000  |
| sp Q0295 AKAP12   | sp Q0295 | 1 | 12 | 12 | 12 | 13  | 191.48 | 224440000  | 275440000  | 178780000  | 207140000   | 277230000   | 207410000  |
| sp Q0297 SLC25A1  | sp Q0297 | 1 | 9  | 9  | 9  | 32  | 34.061 | 1239300000 | 1324700000 | 1314000000 | 1532000000  | 1886000000  | 1774300000 |
| sp Q0300 DST      | sp Q0300 | 1 | 40 | 40 | 40 | 7   | 860.65 | 1806100000 | 1769600000 | 1778600000 | 1879500000  | 1576600000  | 1807100000 |
| sp Q0301 GSTM4    | sp Q0301 | 1 | 7  | 2  | 2  | 43  | 25.561 | 0          | 0          | 0          | 0           | 8165900     | 0          |
| sp Q0311 MLLT1    | sp Q0311 | 1 | 2  | 2  | 2  | 3.9 | 62.055 | 151750000  | 0          | 166600000  | 110600000   | 0           | 0          |
| sp Q0313 CAV1     | sp Q0313 | 2 | 7  | 7  | 7  | 41  | 20.471 | 3051000000 | 3681900000 | 3417900000 | 2797700000  | 3161300000  | 3361000000 |
| sp Q0316 TNFAIP2  | sp Q0316 | 1 | 2  | 2  | 2  | 5   | 72.66  | 0          | 82267000   | 0          | 89241000    | 53699000    | 38445000   |
| sp Q0325 LMNB2    | sp Q0325 | 1 | 17 | 15 | 15 | 29  | 69.948 | 1343700000 | 1361200000 | 1679600000 | 1519700000  | 1580400000  | 1455100000 |
| sp Q0340 PLAUR    | sp Q0340 | 1 | 2  | 2  | 2  | 8.4 | 36.978 | 0          | 0          | 0          | 0           | 0           | 99061000   |
| sp Q0370 CEBPZ    | sp Q0370 | 1 | 11 | 11 | 11 | 15  | 120.97 | 545410000  | 672970000  | 590270000  | 559560000   | 611950000   | 623860000  |
| sp Q0420 RELA     | sp Q0420 | 1 | 5  | 5  | 5  | 13  | 60.218 | 279160000  | 244750000  | 264380000  | 282610000   | 331310000   | 273780000  |
| sp Q0432 UBXN1    | sp Q0432 | 1 | 9  | 9  | 9  | 42  | 33.325 | 986050000  | 1388200000 | 1098100000 | 1268700000  | 1232600000  | 922290000  |
| sp Q0444 GBE1     | sp Q0444 | 1 | 18 | 18 | 18 | 33  | 80.473 | 2722800000 | 2207100000 | 2520200000 | 2372600000  | 2378400000  | 2641100000 |
| sp Q0463 EIF4G1   | sp Q0463 | 2 | 47 | 47 | 42 | 35  | 175.49 | 1.3364E+10 | 1.466E+10  | 1.2043E+10 | 12569000000 | 11741000000 | 1.2484E+10 |
| sp Q0472 TLE3     | sp Q0472 | 4 | 6  | 6  | 6  | 8.7 | 83.416 | 852640000  | 459010000  | 740200000  | 347370000   | 944110000   | 600990000  |
| sp Q0476 GLO1     | sp Q0476 | 1 | 8  | 8  | 8  | 35  | 20.777 | 2174000000 | 1733200000 | 1700700000 | 1765400000  | 2254400000  | 1712600000 |
| sp Q0482 AKR1C1   | sp Q0482 | 1 | 16 | 3  | 0  | 59  | 36.788 | 5649800000 | 5770100000 | 4290500000 | 3596600000  | 4209100000  | 4415800000 |
| sp Q0483 SSBP1    | sp Q0483 | 1 | 6  | 6  | 6  | 49  | 17.259 | 1966100000 | 2344100000 | 1991000000 | 2348800000  | 2573800000  | 2274600000 |
| sp Q0491 YWHAH    | sp Q0491 | 1 | 12 | 10 | 10 | 54  | 28.218 | 4403100000 | 4638500000 | 3538200000 | 3687000000  | 4196000000  | 3841400000 |
| sp Q0494 PLP2     | sp Q0494 | 1 | 2  | 2  | 2  | 18  | 16.691 | 1514600000 | 1281900000 | 0          | 1344800000  | 1357600000  | 0          |
| sp Q0504 CSTF1    | sp Q0504 | 1 | 10 | 10 | 10 | 39  | 48.357 | 857900000  | 646730000  | 625150000  | 672260000   | 775530000   | 633400000  |
| sp Q0520 PTPN12   | sp Q0520 | 1 | 6  | 6  | 6  | 14  | 88.105 | 0          | 0          | 0          | 0           | 0           | 97544000   |
| sp Q0539 PTK2     | sp Q0539 | 1 | 4  | 4  | 4  | 4.9 | 119.23 | 80452000   | 102150000  | 84935000   | 0           | 0           | 0          |
| sp Q0551 SRSF11   | sp Q0551 | 1 | 4  | 4  | 4  | 14  | 53.542 | 630770000  | 525390000  | 511310000  | 681840000   | 602700000   | 527860000  |
| sp Q0563 EEF1A2   | sp Q0563 | 1 | 20 | 9  | 9  | 68  | 50.47  | 706700000  | 694160000  | 645970000  | 562330000   | 482820000   | 393240000  |
| sp Q0568 CALD1    | sp Q0568 | 3 | 23 | 23 | 23 | 29  | 93.23  | 6048500000 | 4942100000 | 5004400000 | 4935000000  | 5069400000  | 4493300000 |
| sp Q0593 FPGS     | sp Q0593 | 1 | 4  | 4  | 4  | 11  | 64.608 | 75688000   | 19246000   | 53743000   | 107100000   | 45168000    | 0          |
| sp Q05D3 CTDSPL2  | sp Q05D3 | 1 | 3  | 3  | 3  | 6.7 | 52.998 | 86760000   | 0          | 0          | 76911000    | 81787000    | 80032000   |
| sp Q0612 PTPN11   | sp Q0612 | 1 | 7  | 7  | 7  | 14  | 68.436 | 471630000  | 429950000  | 443840000  | 342720000   | 383410000   | 451770000  |
| sp Q0613 KDSR     | sp Q0613 | 1 | 3  | 3  | 3  | 14  | 36.187 | 0          | 166920000  | 131600000  | 0           | 122130000   | 0          |

|                  |          |   |    |    |    |     |        |            |            |            |              |              |            |
|------------------|----------|---|----|----|----|-----|--------|------------|------------|------------|--------------|--------------|------------|
| sp Q0620 PPAT    | sp Q0620 | 1 | 7  | 7  | 7  | 21  | 57.398 | 352400000  | 344420000  | 376200000  | 383920000    | 474580000    | 392710000  |
| sp Q0621 GFPT1   | sp Q0621 | 1 | 20 | 20 | 17 | 38  | 78.806 | 1723800000 | 1711500000 | 1565800000 | 2025500000   | 2112000000   | 2034200000 |
| sp Q0626 EXOSC9  | sp Q0626 | 1 | 6  | 6  | 6  | 18  | 48.948 | 384800000  | 373070000  | 368260000  | 303080000    | 435920000    | 413920000  |
| sp Q0632 PSME1   | sp Q0632 | 1 | 12 | 12 | 12 | 43  | 28.723 | 955930000  | 982500000  | 1006500000 | 993410000    | 1002600000   | 662040000  |
| sp Q0654 GABPA   | sp Q0654 | 1 | 5  | 5  | 5  | 20  | 51.295 | 213840000  | 202590000  | 173090000  | 175140000    | 128600000    | 113880000  |
| sp Q0658 RING1   | sp Q0658 | 2 | 3  | 3  | 3  | 15  | 42.429 | 186650000  | 202650000  | 148720000  | 188090000    | 182350000    | 206080000  |
| sp Q0678 FMR1    | sp Q0678 | 1 | 8  | 6  | 6  | 16  | 71.174 | 151490000  | 135280000  | 178460000  | 163540000    | 167060000    | 223850000  |
| sp Q0683 PRDX1   | sp Q0683 | 1 | 16 | 16 | 12 | 73  | 22.11  | 1.0597E+11 | 9.412E+10  | 8.5051E+10 | 94321000000  | 1.0085E+11   | 9.3037E+10 |
| sp Q0702 RPL18   | sp Q0702 | 1 | 7  | 7  | 7  | 42  | 21.634 | 9177800000 | 1.1543E+10 | 1.0052E+10 | 118700000000 | 127780000000 | 1.3321E+10 |
| sp Q0702 C1QBP   | sp Q0702 | 1 | 6  | 6  | 6  | 32  | 31.362 | 7755300000 | 6181200000 | 7358000000 | 8822900000   | 8368900000   | 7548500000 |
| sp Q0706 CKAP4   | sp Q0706 | 1 | 30 | 30 | 29 | 56  | 66.022 | 7491800000 | 6885800000 | 6887900000 | 8256800000   | 8650900000   | 8880100000 |
| sp Q0715 TJP1    | sp Q0715 | 1 | 14 | 14 | 14 | 13  | 195.46 | 679410000  | 791550000  | 626420000  | 600390000    | 632280000    | 502850000  |
| sp Q0766 KHDRBS  | sp Q0766 | 2 | 7  | 7  | 6  | 24  | 48.227 | 3384000000 | 4014800000 | 5164500000 | 4309100000   | 4819500000   | 5451100000 |
| sp Q0781 BAX     | sp Q0781 | 1 | 5  | 5  | 5  | 37  | 21.184 | 392600000  | 428810000  | 192740000  | 337630000    | 372530000    | 408350000  |
| sp Q0782 MCL1    | sp Q0782 | 1 | 1  | 1  | 1  | 6   | 37.337 | 0          | 0          | 0          | 0            | 36191000     | 0          |
| sp Q0786 POLE    | sp Q0786 | 1 | 3  | 3  | 3  | 1.7 | 261.51 | 60705000   | 0          | 0          | 52538000     | 0            | 0          |
| sp Q0786 KLC1    | sp Q0786 | 2 | 16 | 16 | 11 | 29  | 65.309 | 760530000  | 802610000  | 1027000000 | 716420000    | 765460000    | 745580000  |
| sp Q0795 SRSF1   | sp Q0795 | 1 | 12 | 12 | 12 | 44  | 27.744 | 6490500000 | 7284200000 | 6395500000 | 7051000000   | 7595600000   | 6999100000 |
| sp Q0796 ARHGAP  | sp Q0796 | 1 | 12 | 12 | 12 | 39  | 50.435 | 2157100000 | 1802300000 | 1934400000 | 2080400000   | 1873200000   | 2195900000 |
| sp Q0817 SRSF4   | sp Q0817 | 1 | 5  | 2  | 2  | 11  | 56.678 | 137400000  | 0          | 148660000  | 108100000    | 0            | 170850000  |
| sp Q0820 PPP3CA  | sp Q0820 | 3 | 9  | 9  | 9  | 20  | 58.687 | 1031800000 | 1350600000 | 1043400000 | 957880000    | 971190000    | 854680000  |
| sp Q0821 DHX9    | sp Q0821 | 1 | 46 | 46 | 46 | 48  | 140.96 | 1.9682E+10 | 2.016E+10  | 2.0112E+10 | 18576000000  | 18174000000  | 1.9062E+10 |
| sp Q0825 CRYZ    | sp Q0825 | 1 | 12 | 12 | 12 | 47  | 35.206 | 1649400000 | 1561600000 | 1296100000 | 1451900000   | 1685400000   | 1544400000 |
| sp Q0837 GOLGA3  | sp Q0837 | 1 | 7  | 7  | 7  | 7   | 167.35 | 0          | 85663000   | 112300000  | 110520000    | 99095000     | 121120000  |
| sp Q0837 GOLGA2  | sp Q0837 | 1 | 12 | 12 | 12 | 19  | 113.08 | 683680000  | 681110000  | 423430000  | 585980000    | 446950000    | 652600000  |
| sp Q0838 LGALS3B | sp Q0838 | 1 | 10 | 10 | 10 | 27  | 65.33  | 826620000  | 907850000  | 665950000  | 978430000    | 1034800000   | 1135700000 |
| sp Q0849 PDE4D   | sp Q0849 | 1 | 3  | 3  | 3  | 4.4 | 91.114 | 0          | 0          | 0          | 0            | 0            | 121580000  |
| sp Q0872 CD47    | sp Q0872 | 1 | 2  | 2  | 2  | 5.9 | 35.213 | 201990000  | 279170000  | 213740000  | 262540000    | 308650000    | 212270000  |
| sp Q0875 PPID    | sp Q0875 | 1 | 9  | 9  | 9  | 26  | 40.763 | 653950000  | 834950000  | 828860000  | 858920000    | 807040000    | 831460000  |
| sp Q0894 SSRP1   | sp Q0894 | 1 | 20 | 20 | 20 | 36  | 81.074 | 3900900000 | 3929800000 | 3909200000 | 3729600000   | 4155000000   | 4382300000 |
| sp Q08AD CAMSAP2 | sp Q08AD | 1 | 4  | 4  | 4  | 5.2 | 168.09 | 719930000  | 676800000  | 0          | 0            | 0            | 0          |
| sp Q08AF SLFN5   | sp Q08AF | 1 | 3  | 3  | 3  | 3.9 | 101.05 | 0          | 0          | 0          | 0            | 139970000    | 0          |
| sp Q08AG MZT1    | sp Q08AG | 1 | 2  | 2  | 2  | 45  | 8.4787 | 152780000  | 0          | 0          | 0            | 162150000    | 121010000  |
| sp Q08AH ACSM1   | sp Q08AH | 1 | 1  | 1  | 1  | 1.6 | 65.272 | 0          | 0          | 0          | 0            | 0            | 139270000  |
| sp Q08AM VAC14   | sp Q08AM | 1 | 3  | 3  | 3  | 6.6 | 87.972 | 35777000   | 0          | 0          | 0            | 35472000     | 49478000   |
| sp Q08J2 NSUN2   | sp Q08J2 | 1 | 40 | 40 | 40 | 68  | 86.47  | 1.1315E+10 | 1.1067E+10 | 1.0122E+10 | 10735000000  | 11523000000  | 1.2967E+10 |
| sp Q0902 RBBP4   | sp Q0902 | 1 | 12 | 8  | 8  | 55  | 47.655 | 4438200000 | 5471700000 | 4159800000 | 3294000000   | 4142900000   | 3295900000 |
| sp Q0916 NCBP1   | sp Q0916 | 1 | 16 | 16 | 16 | 26  | 91.838 | 1549700000 | 1565200000 | 1442900000 | 1212100000   | 1269400000   | 1319200000 |
| sp Q0932 MGAT5   | sp Q0932 | 1 | 1  | 1  | 1  | 1.2 | 84.542 | 0          | 0          | 0          | 0            | 0            | 327510000  |



|                  |          |   |    |     |    |     |        |            |            |            |             |             |            |
|------------------|----------|---|----|-----|----|-----|--------|------------|------------|------------|-------------|-------------|------------|
| sp Q0966 AHNAK   | sp Q0966 | 2 | ## | 241 | ## | 69  | 629.09 | 1.0797E+11 | 1.0172E+11 | 1.0332E+11 | 92659000000 | 97008000000 | 9.3449E+10 |
| sp Q0P6D CCDC15  | sp Q0P6D | 1 | 1  | 1   | 1  | 0.8 | 110.48 | 125780000  | 0          | 0          | 0           | 0           | 0          |
| sp Q0VDF HSPA14  | sp Q0VDF | 1 | 7  | 7   | 7  | 27  | 54.794 | 199610000  | 215230000  | 307350000  | 206110000   | 197920000   | 156260000  |
| sp Q0VGL LAMTOR4 | sp Q0VGL | 1 | 1  | 1   | 1  | 10  | 10.741 | 0          | 0          | 0          | 0           | 61658000    | 0          |
| sp Q1046 MGAT2   | sp Q1046 | 1 | 2  | 2   | 2  | 7.2 | 51.55  | 0          | 0          | 0          | 0           | 115400000   | 0          |
| sp Q1047 GALNT2  | sp Q1047 | 2 | 23 | 23  | 23 | 50  | 64.732 | 545290000  | 520400000  | 524440000  | 644000000   | 503950000   | 642010000  |
| sp Q1047 GALNT1  | sp Q1047 | 2 | 8  | 8   | 8  | 16  | 64.218 | 445150000  | 412150000  | 482810000  | 365150000   | 447660000   | 497400000  |
| sp Q1056 AP1B1   | sp Q1056 | 1 | 19 | 9   | 9  | 25  | 104.64 | 839320000  | 777650000  | 972720000  | 847180000   | 644760000   | 649130000  |
| sp Q1057 CPSF1   | sp Q1057 | 1 | 11 | 11  | 11 | 9.5 | 160.88 | 455820000  | 762270000  | 603560000  | 367580000   | 376490000   | 496890000  |
| sp Q1058 BST2    | sp Q1058 | 1 | 3  | 3   | 3  | 19  | 19.769 | 104430000  | 145000000  | 110020000  | 113050000   | 962810000   | 856920000  |
| sp Q1071 PMPCA   | sp Q1071 | 1 | 14 | 14  | 14 | 31  | 58.252 | 117810000  | 150000000  | 117060000  | 129430000   | 128720000   | 141240000  |
| sp Q1276 SCRN1   | sp Q1276 | 1 | 4  | 4   | 4  | 12  | 46.382 | 276780000  | 0          | 234900000  | 0           | 0           | 280790000  |
| sp Q1276 WASHC5  | sp Q1276 | 1 | 6  | 6   | 6  | 7.4 | 134.28 | 189260000  | 251950000  | 155670000  | 118980000   | 0           | 0          |
| sp Q1276 NUP160  | sp Q1276 | 1 | 16 | 16  | 16 | 16  | 162.12 | 970730000  | 932370000  | 893690000  | 880050000   | 898150000   | 993400000  |
| sp Q1278 TBL3    | sp Q1278 | 1 | 15 | 15  | 15 | 29  | 89.034 | 135860000  | 115950000  | 131770000  | 138640000   | 177470000   | 146920000  |
| sp Q1278 GTF3C1  | sp Q1278 | 1 | 10 | 10  | 10 | 7.9 | 238.87 | 249900000  | 276630000  | 249270000  | 243060000   | 245780000   | 216240000  |
| sp Q1279 TWF1    | sp Q1279 | 1 | 12 | 9   | 9  | 35  | 40.282 | 111910000  | 127070000  | 119040000  | 863870000   | 998730000   | 130300000  |
| sp Q1279 ASPH    | sp Q1279 | 1 | 22 | 22  | 22 | 40  | 85.862 | 307570000  | 311770000  | 298480000  | 317450000   | 340250000   | 379560000  |
| sp Q1280 TFCP2   | sp Q1280 | 2 | 5  | 5   | 4  | 15  | 57.255 | 205570000  | 200710000  | 368780000  | 254080000   | 253190000   | 284770000  |
| sp Q1280 AKAP13  | sp Q1280 | 1 | 5  | 5   | 5  | 3.4 | 307.55 | 198400000  | 0          | 159040000  | 0           | 0           | 0          |
| sp Q1282 SMARCB1 | sp Q1282 | 1 | 8  | 8   | 8  | 38  | 44.141 | 342830000  | 290210000  | 350190000  | 492180000   | 403620000   | 241400000  |
| sp Q1284 FSTL1   | sp Q1284 | 1 | 1  | 1   | 1  | 3.9 | 34.985 | 0          | 0          | 0          | 0           | 30660000    | 0          |
| sp Q1284 STX4    | sp Q1284 | 1 | 5  | 5   | 5  | 28  | 34.18  | 281450000  | 335460000  | 246730000  | 303380000   | 291000000   | 362730000  |
| sp Q1284 GRSF1   | sp Q1284 | 1 | 13 | 13  | 13 | 36  | 53.126 | 862500000  | 789470000  | 839810000  | 787500000   | 897450000   | 793500000  |
| sp Q1287 CHD3    | sp Q1287 | 1 | 8  | 2   | 2  | 6.1 | 226.59 | 0          | 0          | 0          | 0           | 54697000    | 0          |
| sp Q1287 SF3A3   | sp Q1287 | 1 | 12 | 12  | 12 | 28  | 58.848 | 205500000  | 252670000  | 238780000  | 242630000   | 235590000   | 225870000  |
| sp Q1288 TP53BP1 | sp Q1288 | 1 | 30 | 30  | 30 | 26  | 213.57 | 158770000  | 150800000  | 194490000  | 132400000   | 154190000   | 150940000  |
| sp Q1289 TMEM115 | sp Q1289 | 1 | 1  | 1   | 1  | 6.6 | 38.197 | 0          | 0          | 0          | 0           | 0           | 37250000   |
| sp Q1290 AIMP1   | sp Q1290 | 1 | 13 | 13  | 13 | 61  | 34.352 | 366590000  | 340200000  | 388310000  | 400490000   | 349180000   | 434710000  |
| sp Q1290 ILF2    | sp Q1290 | 1 | 15 | 15  | 15 | 59  | 43.062 | 559550000  | 449600000  | 484340000  | 546470000   | 612410000   | 543710000  |
| sp Q1290 ILF3    | sp Q1290 | 1 | 27 | 27  | 24 | 43  | 95.337 | 1.0629E+10 | 1.1821E+10 | 1.1568E+10 | 10246000000 | 11390000000 | 1.0955E+10 |
| sp Q1290 LMAN2   | sp Q1290 | 1 | 12 | 12  | 12 | 47  | 40.228 | 247270000  | 216570000  | 227810000  | 219350000   | 312500000   | 255680000  |
| sp Q1291 PTPRJ   | sp Q1291 | 1 | 2  | 2   | 2  | 2.1 | 145.94 | 48565000   | 85305000   | 0          | 40798000    | 40570000    | 0          |
| sp Q1293 TRAP1   | sp Q1293 | 1 | 26 | 26  | 26 | 44  | 80.109 | 678700000  | 783650000  | 805220000  | 825870000   | 725350000   | 828630000  |
| sp Q1293 TRAF2   | sp Q1293 | 1 | 2  | 2   | 2  | 4   | 55.859 | 0          | 155230000  | 0          | 0           | 0           | 0          |
| sp Q1296 TAF10   | sp Q1296 | 1 | 1  | 1   | 1  | 12  | 21.711 | 0          | 0          | 0          | 0           | 0           | 36763000   |
| sp Q1296 MYO1E   | sp Q1296 | 2 | 22 | 22  | 22 | 25  | 127.06 | 181110000  | 182810000  | 152040000  | 171240000   | 174030000   | 169610000  |
| sp Q1297 PPP1R8  | sp Q1297 | 1 | 7  | 7   | 7  | 39  | 38.478 | 511010000  | 377540000  | 368800000  | 337960000   | 381870000   | 384440000  |
| sp Q1297 PTP4A2  | sp Q1297 | 1 | 4  | 1   | 1  | 29  | 19.127 | 0          | 0          | 0          | 0           | 0           | 69483000   |

|                  |          |   |    |    |    |     |        |            |            |            |            |            |            |
|------------------|----------|---|----|----|----|-----|--------|------------|------------|------------|------------|------------|------------|
| sp Q1297 ABR     | sp Q1297 | 1 | 2  | 2  | 2  | 2.6 | 97.597 | 0          | 0          | 0          | 0          | 0          | 61106000   |
| sp Q1299 CSTF3   | sp Q1299 | 1 | 8  | 8  | 8  | 15  | 82.921 | 0          | 0          | 174260000  | 176690000  | 177740000  | 195930000  |
| sp Q1301 ECH1    | sp Q1301 | 1 | 8  | 8  | 8  | 33  | 35.816 | 1234700000 | 1308800000 | 1319300000 | 1302600000 | 1539300000 | 1279200000 |
| sp Q1301 MLLT11  | sp Q1301 | 1 | 3  | 3  | 3  | 54  | 10.061 | 128270000  | 148900000  | 212250000  | 157990000  | 235100000  | 58223000   |
| sp Q1304 CDC16   | sp Q1304 | 1 | 6  | 6  | 6  | 13  | 71.655 | 190640000  | 220130000  | 221720000  | 140180000  | 208050000  | 236460000  |
| sp Q1304 STK4    | sp Q1304 | 1 | 1  | 1  | 1  | 3.3 | 55.63  | 0          | 0          | 0          | 0          | 0          | 19361000   |
| sp Q1304 FLII    | sp Q1304 | 1 | 24 | 24 | 24 | 26  | 144.75 | 2103600000 | 2212000000 | 1912200000 | 2076400000 | 2270100000 | 1951400000 |
| sp Q1304 TRIM32  | sp Q1304 | 1 | 3  | 3  | 3  | 5.7 | 71.988 | 0          | 0          | 41311000   | 0          | 44611000   | 0          |
| sp Q1305 COASY   | sp Q1305 | 1 | 13 | 13 | 13 | 38  | 62.328 | 936440000  | 879820000  | 1199100000 | 981640000  | 832250000  | 834900000  |
| sp Q1308 MRPL28  | sp Q1308 | 1 | 3  | 3  | 3  | 21  | 30.156 | 116630000  | 104410000  | 104990000  | 107650000  | 83149000   | 113210000  |
| sp Q1308 ACACA   | sp Q1308 | 1 | 36 | 36 | 32 | 23  | 265.55 | 1835100000 | 1959000000 | 2186300000 | 1829000000 | 1997300000 | 1847300000 |
| sp Q1309 GPS1    | sp Q1309 | 1 | 13 | 13 | 13 | 33  | 55.536 | 1531900000 | 1336600000 | 1497300000 | 1263200000 | 1185300000 | 1306400000 |
| sp Q1311 CHAF1A  | sp Q1311 | 1 | 1  | 1  | 1  | 2.1 | 106.91 | 0          | 0          | 0          | 0          | 41947000   | 0          |
| sp Q1311 CHAF1B  | sp Q1311 | 1 | 2  | 2  | 2  | 5.9 | 61.492 | 0          | 0          | 70174000   | 0          | 0          | 0          |
| sp Q1312 IK      | sp Q1312 | 1 | 11 | 11 | 11 | 27  | 65.601 | 733960000  | 777150000  | 751470000  | 580400000  | 701250000  | 751450000  |
| sp Q1312 MTAP    | sp Q1312 | 1 | 16 | 16 | 16 | 73  | 31.236 | 3168700000 | 3212300000 | 3563700000 | 2798500000 | 3139800000 | 2886700000 |
| sp Q1313 PRKAA1  | sp Q1313 | 2 | 4  | 4  | 4  | 11  | 64.009 | 110120000  | 111310000  | 104700000  | 84804000   | 104350000  | 102420000  |
| sp Q1313 PPFIA1  | sp Q1313 | 1 | 6  | 6  | 6  | 7.8 | 135.78 | 142630000  | 0          | 150610000  | 91573000   | 212770000  | 164310000  |
| sp Q1314 EIF2B5  | sp Q1314 | 1 | 7  | 7  | 7  | 16  | 80.379 | 497440000  | 616670000  | 540020000  | 549280000  | 547790000  | 680050000  |
| sp Q1314 TARDBP  | sp Q1314 | 1 | 11 | 11 | 11 | 39  | 44.739 | 2095800000 | 2234000000 | 1669000000 | 2255100000 | 2224000000 | 1891200000 |
| sp Q1315 HNRNPA  | sp Q1315 | 1 | 8  | 8  | 8  | 37  | 30.84  | 5289800000 | 6280100000 | 4873500000 | 4751400000 | 4626000000 | 4488900000 |
| sp Q1315 AIMP2   | sp Q1315 | 1 | 9  | 9  | 9  | 46  | 35.348 | 2193500000 | 2382700000 | 2102100000 | 2321200000 | 2576000000 | 2770300000 |
| sp Q1315 FADD    | sp Q1315 | 1 | 2  | 2  | 2  | 21  | 23.279 | 73328000   | 81268000   | 79562000   | 0          | 80806000   | 0          |
| sp Q1316 PRDX4   | sp Q1316 | 1 | 13 | 10 | 10 | 60  | 30.54  | 3762800000 | 3639800000 | 4562600000 | 4370100000 | 5788600000 | 5319900000 |
| sp Q1317 PAK2    | sp Q1317 | 3 | 12 | 12 | 12 | 36  | 58.042 | 1262700000 | 1032700000 | 1444400000 | 998790000  | 1001600000 | 1085000000 |
| sp Q1318 CBX3    | sp Q1318 | 1 | 6  | 6  | 5  | 52  | 20.811 | 4653500000 | 5645900000 | 4724800000 | 3972400000 | 4733500000 | 5115400000 |
| sp Q1318 STK3    | sp Q1318 | 1 | 2  | 2  | 2  | 4.5 | 56.3   | 0          | 0          | 0          | 0          | 0          | 26950000   |
| sp Q1319 STX5    | sp Q1319 | 1 | 5  | 5  | 5  | 23  | 39.672 | 268250000  | 202060000  | 0          | 214910000  | 231090000  | 214260000  |
| sp Q1320 PSMD2   | sp Q1320 | 1 | 33 | 33 | 33 | 49  | 100.2  | 6667000000 | 6713400000 | 7027400000 | 7289700000 | 6054500000 | 5624800000 |
| sp Q1320 DDX10   | sp Q1320 | 1 | 1  | 1  | 1  | 1.7 | 100.89 | 0          | 0          | 0          | 0          | 9287500    | 0          |
| sp Q1321 DNAJC3  | sp Q1321 | 1 | 4  | 4  | 4  | 9.1 | 57.579 | 153630000  | 121750000  | 0          | 0          | 160070000  | 327730000  |
| sp Q1322 SELENBP | sp Q1322 | 1 | 9  | 9  | 9  | 24  | 52.39  | 399770000  | 554860000  | 396330000  | 357930000  | 283090000  | 358950000  |
| sp Q1323 NME3    | sp Q1323 | 1 | 3  | 3  | 3  | 25  | 19.015 | 220350000  | 0          | 140620000  | 0          | 0          | 232870000  |
| sp Q1324 SRSF9   | sp Q1324 | 1 | 6  | 6  | 6  | 31  | 25.542 | 1151300000 | 1074400000 | 1427400000 | 967160000  | 1057700000 | 829990000  |
| sp Q1324 SRSF5   | sp Q1324 | 1 | 7  | 6  | 6  | 25  | 31.263 | 373240000  | 475120000  | 403950000  | 391720000  | 356240000  | 327120000  |
| sp Q1324 SRSF6   | sp Q1324 | 1 | 8  | 8  | 5  | 21  | 39.586 | 1733700000 | 2207900000 | 1910700000 | 2318600000 | 2281400000 | 2463200000 |
| sp Q1325 MAD2L1  | sp Q1325 | 1 | 7  | 7  | 7  | 32  | 23.51  | 431310000  | 432300000  | 485030000  | 389620000  | 343940000  | 361110000  |
| sp Q1326 TRIM28  | sp Q1326 | 1 | 27 | 27 | 27 | 61  | 88.549 | 8619300000 | 8315500000 | 8489300000 | 8778200000 | 8060500000 | 8391500000 |
| sp Q1326 DHRS2   | sp Q1326 | 1 | 1  | 1  | 1  | 2.5 | 29.926 | 0          | 0          | 0          | 0          | 0          | 0          |

|                   |          |   |    |    |    |     |        |            |            |            |            |            |            |
|-------------------|----------|---|----|----|----|-----|--------|------------|------------|------------|------------|------------|------------|
| sp Q1328 G3BP1    | sp Q1328 | 1 | 18 | 18 | 17 | 55  | 52.164 | 8516900000 | 7944400000 | 8566300000 | 7108100000 | 6896300000 | 8367000000 |
| sp Q1330 KCNA2    | sp Q1330 | 1 | 1  | 1  | 1  | 7.9 | 41     | 0          | 0          | 0          | 0          | 0          | 42564000   |
| sp Q1331 PABPC4   | sp Q1331 | 2 | 23 | 16 | 15 | 37  | 70.782 | 2098600000 | 1984500000 | 2298500000 | 2116500000 | 2586400000 | 2941000000 |
| sp Q1332 IFIT5    | sp Q1332 | 1 | 1  | 1  | 1  | 2.1 | 55.846 | 0          | 0          | 0          | 0          | 0          | 0          |
| sp Q1333 MTA1     | sp Q1333 | 1 | 5  | 4  | 3  | 9.2 | 80.785 | 185880000  | 139680000  | 0          | 122190000  | 137570000  | 143880000  |
| sp Q1334 EIF3I    | sp Q1334 | 1 | 12 | 12 | 12 | 53  | 36.501 | 4842400000 | 4884300000 | 4951900000 | 4570400000 | 4252800000 | 4862600000 |
| sp Q1336 CTBP1    | sp Q1336 | 1 | 9  | 5  | 5  | 29  | 47.535 | 635350000  | 401280000  | 182000000  | 319710000  | 442840000  | 375020000  |
| sp Q1340 UBE2V1   | sp Q1340 | 1 | 6  | 6  | 2  | 44  | 16.495 | 1665700000 | 1241600000 | 1375500000 | 1397900000 | 1457900000 | 1446300000 |
| sp Q1340 MRPL49   | sp Q1340 | 1 | 3  | 3  | 3  | 24  | 19.198 | 583790000  | 287990000  | 342470000  | 330660000  | 463290000  | 273560000  |
| sp Q1340 DYNC1I2  | sp Q1340 | 1 | 12 | 12 | 12 | 31  | 71.456 | 2068600000 | 2355300000 | 2298200000 | 1839400000 | 1639500000 | 2229500000 |
| sp Q1341 ORC2     | sp Q1341 | 1 | 2  | 2  | 2  | 5.2 | 65.971 | 0          | 0          | 0          | 23467000   | 0          | 0          |
| sp Q1341 ILK      | sp Q1341 | 1 | 15 | 15 | 15 | 38  | 51.419 | 1126100000 | 1307600000 | 1244100000 | 1170300000 | 1454400000 | 1399500000 |
| sp Q1342 NNT      | sp Q1342 | 1 | 33 | 33 | 33 | 38  | 113.89 | 5737000000 | 5682000000 | 5086900000 | 5844000000 | 5779100000 | 5917100000 |
| sp Q1342 SNTB2    | sp Q1342 | 1 | 5  | 5  | 5  | 14  | 57.949 | 139880000  | 136840000  | 133920000  | 0          | 147190000  | 135570000  |
| sp Q1342 PPIG     | sp Q1342 | 1 | 2  | 2  | 2  | 3.2 | 88.616 | 0          | 0          | 0          | 97456000   | 0          | 0          |
| sp Q1342 TCOF1    | sp Q1342 | 1 | 19 | 19 | 19 | 17  | 152.1  | 2490200000 | 2210000000 | 2138700000 | 2338400000 | 2374300000 | 2553900000 |
| sp Q1343 SF3B2    | sp Q1343 | 1 | 27 | 27 | 27 | 40  | 100.23 | 5556900000 | 4787400000 | 5664000000 | 4376400000 | 4745900000 | 4267700000 |
| sp Q1343 GOLGA4   | sp Q1343 | 1 | 6  | 6  | 6  | 3.7 | 261.14 | 0          | 0          | 0          | 2360000000 | 1869300000 | 0          |
| sp Q1344 PDAP1    | sp Q1344 | 1 | 7  | 7  | 7  | 38  | 20.63  | 2285300000 | 2479900000 | 1874100000 | 1995200000 | 2391200000 | 1768900000 |
| sp Q1344 ADAM9    | sp Q1344 | 1 | 5  | 5  | 5  | 9.8 | 90.555 | 303220000  | 405130000  | 231750000  | 366330000  | 269670000  | 292160000  |
| sp Q1344 TMED1    | sp Q1344 | 1 | 3  | 3  | 3  | 17  | 25.206 | 366010000  | 460630000  | 271070000  | 365240000  | 450350000  | 588030000  |
| sp Q1345 FKBP5    | sp Q1345 | 1 | 4  | 4  | 4  | 14  | 51.212 | 140850000  | 0          | 131950000  | 161750000  | 110320000  | 0          |
| sp Q1345 TUSC3    | sp Q1345 | 1 | 1  | 1  | 1  | 2.9 | 39.676 | 0          | 0          | 0          | 7535500    | 0          | 0          |
| sp Q1346 ROCK1    | sp Q1346 | 1 | 7  | 3  | 3  | 6.5 | 158.17 | 0          | 0          | 0          | 104090000  | 0          | 0          |
| sp Q1348 SMAD4    | sp Q1348 | 1 | 5  | 5  | 5  | 19  | 60.438 | 0          | 150570000  | 135900000  | 0          | 140210000  | 100420000  |
| sp Q1349 PICALM   | sp Q1349 | 2 | 10 | 10 | 10 | 24  | 70.754 | 912170000  | 743960000  | 745030000  | 1022600000 | 803870000  | 801530000  |
| sp Q1350 SQSTM1   | sp Q1350 | 1 | 15 | 15 | 15 | 58  | 47.687 | 3207000000 | 3476200000 | 2910500000 | 6421600000 | 6613600000 | 7259100000 |
| sp Q1350 MED21    | sp Q1350 | 1 | 1  | 1  | 1  | 17  | 15.564 | 13440000   | 11649000   | 0          | 13300000   | 19835000   | 0          |
| sp Q1350 MTX1     | sp Q1350 | 1 | 5  | 5  | 5  | 16  | 51.462 | 287380000  | 0          | 329510000  | 292500000  | 311850000  | 0          |
| sp Q1350 TUBB3    | sp Q1350 | 1 | 17 | 4  | 4  | 53  | 50.432 | 756750000  | 451070000  | 431070000  | 877920000  | 384960000  | 450950000  |
| sp Q1351 ASAHI    | sp Q1351 | 1 | 1  | 1  | 1  | 4.3 | 44.659 | 0          | 0          | 0          | 0          | 0          | 29619000   |
| sp Q1352 PRPF4B   | sp Q1352 | 1 | 6  | 6  | 6  | 6.2 | 116.99 | 154880000  | 186710000  | 159660000  | 131770000  | 163920000  | 111650000  |
| sp Q1352 PIN1     | sp Q1352 | 2 | 7  | 7  | 7  | 64  | 18.243 | 737260000  | 807300000  | 687120000  | 713220000  | 896770000  | 771400000  |
| sp Q1354 EIF4EBP1 | sp Q1354 | 1 | 1  | 1  | 1  | 10  | 12.58  | 0          | 0          | 0          | 0          | 0          | 71069000   |
| sp Q1354 EIF4EBP2 | sp Q1354 | 1 | 2  | 2  | 2  | 38  | 12.939 | 0          | 0          | 0          | 0          | 0          | 74730000   |
| sp Q1354 RIPK1    | sp Q1354 | 1 | 1  | 1  | 1  | 1.5 | 75.93  | 0          | 0          | 0          | 0          | 0          | 28194000   |
| sp Q1354 HDAC1    | sp Q1354 | 1 | 8  | 5  | 5  | 24  | 55.102 | 898550000  | 567690000  | 800970000  | 625740000  | 755540000  | 811570000  |
| sp Q1355 CAMK2G   | sp Q1355 | 1 | 4  | 2  | 2  | 9.3 | 62.606 | 0          | 0          | 0          | 0          | 0          | 52888000   |
| sp Q1355 CAMK2D   | sp Q1355 | 1 | 5  | 5  | 3  | 16  | 56.369 | 294150000  | 348900000  | 208090000  | 501210000  | 273120000  | 354590000  |

|                  |          |   |    |     |    |     |        |            |            |            |             |             |            |
|------------------|----------|---|----|-----|----|-----|--------|------------|------------|------------|-------------|-------------|------------|
| sp Q1356 DCTN2   | sp Q1356 | 1 | 16 | 16  | 16 | 56  | 44.23  | 2014900000 | 2196700000 | 2025900000 | 1708500000  | 1755400000  | 1672100000 |
| sp Q1356 NAE1    | sp Q1356 | 1 | 9  | 9   | 9  | 28  | 60.246 | 687630000  | 728670000  | 663740000  | 645220000   | 797760000   | 560210000  |
| sp Q1357 SNW1    | sp Q1357 | 1 | 12 | 12  | 12 | 33  | 61.494 | 825240000  | 969170000  | 929900000  | 788380000   | 882650000   | 938210000  |
| sp Q1357 IQGAP2  | sp Q1357 | 1 | 26 | 24  | 24 | 25  | 180.58 | 928190000  | 940240000  | 882510000  | 889050000   | 990310000   | 994400000  |
| sp Q1358 STIM1   | sp Q1358 | 1 | 3  | 3   | 3  | 6.3 | 77.422 | 48820000   | 50855000   | 65658000   | 62281000    | 61688000    | 77954000   |
| sp Q1359 TRA2A   | sp Q1359 | 1 | 6  | 5   | 5  | 25  | 32.688 | 576770000  | 738530000  | 551800000  | 846120000   | 587500000   | 587460000  |
| sp Q1359 SNX1    | sp Q1359 | 1 | 9  | 7   | 7  | 19  | 59.069 | 653730000  | 737320000  | 533650000  | 628040000   | 816600000   | 721640000  |
| sp Q1360 KRR1    | sp Q1360 | 1 | 3  | 3   | 3  | 6.6 | 43.664 | 0          | 100990000  | 126820000  | 106790000   | 0           | 0          |
| sp Q1361 PWP1    | sp Q1361 | 1 | 7  | 7   | 7  | 17  | 55.827 | 247080000  | 259130000  | 293580000  | 235130000   | 204560000   | 223480000  |
| sp Q1361 MTMR2   | sp Q1361 | 2 | 4  | 4   | 4  | 7.6 | 73.38  | 211360000  | 208610000  | 200630000  | 206540000   | 139660000   | 183480000  |
| sp Q1361 CUL1    | sp Q1361 | 1 | 10 | 10  | 10 | 18  | 89.677 | 346930000  | 389550000  | 349180000  | 327310000   | 315880000   | 387080000  |
| sp Q1361 CUL2    | sp Q1361 | 1 | 11 | 11  | 11 | 20  | 86.982 | 437860000  | 402680000  | 499250000  | 341000000   | 353510000   | 329820000  |
| sp Q1361 CUL3    | sp Q1361 | 1 | 6  | 6   | 6  | 10  | 88.929 | 180020000  | 225780000  | 208610000  | 270580000   | 148510000   | 168760000  |
| sp Q1361 CUL4A   | sp Q1361 | 1 | 20 | 20  | 14 | 31  | 87.679 | 1337900000 | 1339100000 | 1355700000 | 1119500000  | 1294800000  | 1099400000 |
| sp Q1362 CUL4B   | sp Q1362 | 1 | 15 | 9   | 9  | 16  | 103.98 | 539260000  | 680500000  | 546060000  | 535910000   | 506120000   | 520780000  |
| sp Q1363 TSTA3   | sp Q1363 | 1 | 5  | 5   | 5  | 19  | 35.892 | 672520000  | 763130000  | 665420000  | 622990000   | 705460000   | 549080000  |
| sp Q1363 RAB31   | sp Q1363 | 1 | 7  | 7   | 6  | 47  | 21.569 | 661400000  | 457920000  | 504080000  | 561950000   | 510390000   | 586250000  |
| sp Q1363 RAB32   | sp Q1363 | 3 | 10 | 10  | 10 | 53  | 24.997 | 1640700000 | 1417400000 | 1410600000 | 1482000000  | 1434200000  | 1618600000 |
| sp Q1364 TPBG    | sp Q1364 | 1 | 2  | 2   | 2  | 6.9 | 46.031 | 0          | 0          | 0          | 0           | 0           | 36088000   |
| sp Q1364 FHL1    | sp Q1364 | 1 | 4  | 4   | 4  | 14  | 36.263 | 339200000  | 283890000  | 0          | 207280000   | 218760000   | 176430000  |
| sp Q1364 FHL3    | sp Q1364 | 1 | 8  | 8   | 8  | 44  | 31.192 | 436490000  | 584450000  | 733600000  | 522750000   | 587710000   | 466230000  |
| sp Q1368 AAMP    | sp Q1368 | 1 | 4  | 4   | 4  | 12  | 46.75  | 259830000  | 166820000  | 206950000  | 177810000   | 232220000   | 0          |
| sp Q1372 MOGS    | sp Q1372 | 1 | 6  | 6   | 6  | 10  | 91.916 | 283020000  | 366110000  | 322890000  | 320280000   | 388890000   | 336160000  |
| sp Q1374 ALCAM   | sp Q1374 | 1 | 9  | 9   | 9  | 24  | 65.102 | 1025600000 | 1002000000 | 1240500000 | 759070000   | 1018100000  | 1151200000 |
| sp Q1375 LAMB3   | sp Q1375 | 1 | 4  | 4   | 4  | 7.7 | 129.57 | 107940000  | 155420000  | 116830000  | 173920000   | 94156000    | 96680000   |
| sp Q1376 THOC5   | sp Q1376 | 1 | 9  | 9   | 9  | 24  | 78.507 | 268890000  | 0          | 260130000  | 308970000   | 207160000   | 283180000  |
| sp Q1381 SPTAN1  | sp Q1381 | 2 | ## | 126 | ## | 65  | 284.54 | 3.5328E+10 | 3.6439E+10 | 3.5611E+10 | 30218000000 | 30396000000 | 3.2155E+10 |
| sp Q1382 GNL2    | sp Q1382 | 1 | 9  | 9   | 9  | 15  | 83.654 | 182060000  | 157890000  | 198800000  | 153000000   | 184800000   | 209980000  |
| sp Q1383 DDX39B  | sp Q1383 | 1 | 21 | 21  | 10 | 60  | 48.991 | 9949800000 | 1.1378E+10 | 1.1567E+10 | 10792000000 | 10238000000 | 1.173E+10  |
| sp Q1386 BLMH    | sp Q1386 | 1 | 12 | 12  | 12 | 36  | 52.562 | 1037300000 | 992440000  | 1161500000 | 1117500000  | 862550000   | 919700000  |
| sp Q1386 EXOSC2  | sp Q1386 | 1 | 7  | 7   | 7  | 32  | 32.789 | 733210000  | 661120000  | 804050000  | 762740000   | 810360000   | 764860000  |
| sp Q1388 TUBB2A  | sp Q1388 | 1 | 22 | 6   | 1  | 67  | 49.906 | 951150000  | 2517100000 | 658930000  | 1151900000  | 1281000000  | 584460000  |
| sp Q6P1K GTF2H2C | sp Q6P1K | 2 | 3  | 3   | 3  | 8.4 | 44.452 | 85115000   | 70936000   | 85288000   | 78610000    | 90311000    | 69876000   |
| sp Q1389 BYSL    | sp Q1389 | 1 | 11 | 11  | 11 | 31  | 49.601 | 425590000  | 446950000  | 442580000  | 425080000   | 353710000   | 329100000  |
| sp Q1390 IDI1    | sp Q1390 | 2 | 5  | 5   | 5  | 33  | 26.319 | 503270000  | 465660000  | 414230000  | 279070000   | 445230000   | 367190000  |
| sp Q1395 CBFB    | sp Q1395 | 1 | 3  | 3   | 3  | 18  | 21.508 | 255540000  | 226190000  | 236290000  | 284500000   | 360730000   | 312990000  |
| sp Q1395 NFYC    | sp Q1395 | 1 | 1  | 1   | 1  | 2.6 | 50.302 | 0          | 0          | 0          | 0           | 0           | 38834000   |
| sp Q1400 CKAP5   | sp Q1400 | 1 | 28 | 28  | 28 | 20  | 225.49 | 1751200000 | 1599500000 | 1405100000 | 1628500000  | 1665200000  | 1519200000 |
| sp Q1401 CIRBP   | sp Q1401 | 1 | 1  | 1   | 1  | 6.4 | 18.648 | 0          | 0          | 0          | 0           | 0           | 44629000   |

|                  |           |   |    |     |    |     |        |            |            |            |             |             |            |
|------------------|-----------|---|----|-----|----|-----|--------|------------|------------|------------|-------------|-------------|------------|
| sp Q14019 COTL1  | sp Q14019 | 1 | 9  | 9   | 9  | 63  | 15.945 | 3691800000 | 4183600000 | 3333100000 | 3476000000  | 3707400000  | 3284400000 |
| sp Q1406 COX17   | sp Q1406  | 1 | 3  | 3   | 3  | 57  | 6.9151 | 356200000  | 272170000  | 296690000  | 262890000   | 0           | 0          |
| sp Q1410 HNRNPD  | sp Q1410  | 1 | 12 | 12  | 11 | 30  | 38.434 | 8652400000 | 7743400000 | 7170300000 | 8998100000  | 7693400000  | 8154500000 |
| sp Q1410 SCARB2  | sp Q1410  | 1 | 6  | 6   | 6  | 18  | 54.29  | 439590000  | 701970000  | 510420000  | 599310000   | 495030000   | 500660000  |
| sp Q14114 LRP8   | sp Q14114 | 1 | 1  | 1   | 1  | 1.8 | 105.63 | 0          | 0          | 0          | 0           | 0           | 32750000   |
| sp Q14116 IL18   | sp Q14116 | 1 | 5  | 5   | 5  | 35  | 22.326 | 1098400000 | 1038700000 | 767270000  | 771280000   | 828920000   | 858290000  |
| sp Q14118 DAG1   | sp Q14118 | 1 | 3  | 3   | 3  | 6   | 97.44  | 0          | 0          | 0          | 0           | 234560000   | 0          |
| sp Q14126 DSG2   | sp Q14126 | 1 | 17 | 17  | 17 | 26  | 122.29 | 1394900000 | 1476600000 | 1326100000 | 1471300000  | 1481100000  | 1500000000 |
| sp Q1413 BOP1    | sp Q1413  | 1 | 19 | 19  | 19 | 38  | 83.629 | 1149600000 | 1495600000 | 972320000  | 1421300000  | 1670300000  | 1434900000 |
| sp Q14139 UBE4A  | sp Q14139 | 1 | 2  | 2   | 2  | 2.8 | 122.56 | 0          | 0          | 0          | 0           | 0           | 69452000   |
| sp Q1414 SEPT6   | sp Q1414  | 1 | 8  | 3   | 3  | 28  | 49.716 | 241410000  | 161850000  | 201860000  | 223930000   | 206470000   | 230410000  |
| sp Q14146 URB2   | sp Q14146 | 1 | 5  | 5   | 5  | 5   | 170.54 | 0          | 128320000  | 0          | 0           | 76794000    | 0          |
| sp Q1415 SAFB2   | sp Q1415  | 1 | 15 | 7   | 7  | 17  | 107.47 | 153710000  | 115500000  | 0          | 0           | 0           | 0          |
| sp Q1415 EIF3A   | sp Q1415  | 1 | 53 | 53  | 53 | 40  | 166.57 | 8405500000 | 9229000000 | 8422400000 | 7926800000  | 8313700000  | 9192300000 |
| sp Q1415 UBAP2L  | sp Q1415  | 1 | 20 | 20  | 20 | 34  | 114.53 | 2526100000 | 2520400000 | 2446900000 | 1924300000  | 2026800000  | 2060400000 |
| sp Q14166 SCRIB  | sp Q14166 | 2 | 10 | 10  | 10 | 12  | 174.88 | 411520000  | 315380000  | 404220000  | 402970000   | 472520000   | 251340000  |
| sp Q14166 GIT2   | sp Q14166 | 1 | 4  | 4   | 3  | 12  | 84.542 | 0          | 138520000  | 137890000  | 91468000    | 0           | 0          |
| sp Q14166 MLEC   | sp Q14166 | 1 | 7  | 7   | 7  | 30  | 32.233 | 391420000  | 402610000  | 401190000  | 381560000   | 444140000   | 550720000  |
| sp Q14166 TTLL12 | sp Q14166 | 1 | 25 | 25  | 25 | 52  | 74.403 | 3366000000 | 3773000000 | 3489300000 | 3390000000  | 3341200000  | 3534500000 |
| sp Q1418 POLA2   | sp Q1418  | 1 | 8  | 8   | 8  | 26  | 65.947 | 316170000  | 447570000  | 404690000  | 349960000   | 304460000   | 394450000  |
| sp Q1419 FHL2    | sp Q1419  | 1 | 11 | 11  | 11 | 56  | 32.193 | 1495200000 | 1277100000 | 1555300000 | 1317900000  | 1693900000  | 1352100000 |
| sp Q1419 DPYSL3  | sp Q1419  | 1 | 21 | 21  | 17 | 55  | 61.963 | 5628300000 | 4779400000 | 5421200000 | 4956500000  | 4546900000  | 5246200000 |
| sp Q1419 MRPL58  | sp Q1419  | 1 | 3  | 3   | 3  | 19  | 23.63  | 151320000  | 128850000  | 0          | 0           | 120760000   | 115260000  |
| sp Q1420 ZMYM3   | sp Q1420  | 1 | 2  | 2   | 2  | 4.3 | 152.38 | 0          | 0          | 0          | 0           | 0           | 7288500    |
| sp Q1420 DCTN1   | sp Q1420  | 1 | 28 | 28  | 28 | 31  | 141.69 | 1836600000 | 1488500000 | 1752300000 | 1402000000  | 1685600000  | 1550300000 |
| sp Q1420 DYNC1H1 | sp Q1420  | 1 | ## | 164 | ## | 42  | 532.4  | 2.4479E+10 | 2.483E+10  | 2.463E+10  | 25350000000 | 26183000000 | 2.5929E+10 |
| sp Q1423 EIF2B1  | sp Q1423  | 1 | 12 | 12  | 12 | 47  | 33.712 | 1040600000 | 1125800000 | 1060800000 | 1222600000  | 964210000   | 680970000  |
| sp Q1424 EIF4A2  | sp Q1424  | 1 | 15 | 3   | 3  | 43  | 46.402 | 145100000  | 64665000   | 240470000  | 0           | 134540000   | 161920000  |
| sp Q1424 ELOA    | sp Q1424  | 1 | 3  | 3   | 3  | 5.6 | 89.908 | 165030000  | 0          | 125860000  | 126510000   | 0           | 0          |
| sp Q1424 MAP7    | sp Q1424  | 1 | 7  | 7   | 7  | 12  | 84.051 | 0          | 391730000  | 398540000  | 0           | 397440000   | 354700000  |
| sp Q1424 CTTN    | sp Q1424  | 1 | 23 | 23  | 23 | 48  | 61.585 | 7109500000 | 5862300000 | 6915000000 | 4547400000  | 5302500000  | 5107900000 |
| sp Q1424 ENDOG   | sp Q1424  | 1 | 2  | 2   | 2  | 13  | 32.62  | 56501000   | 0          | 0          | 0           | 0           | 0          |
| sp Q1425 FLOT2   | sp Q1425  | 1 | 9  | 9   | 9  | 27  | 47.064 | 380470000  | 450350000  | 413120000  | 428000000   | 326060000   | 314100000  |
| sp Q1425 RCN2    | sp Q1425  | 1 | 9  | 9   | 9  | 47  | 36.876 | 682340000  | 569290000  | 638150000  | 726880000   | 1057100000  | 836640000  |
| sp Q1425 TRIM25  | sp Q1425  | 1 | 19 | 19  | 19 | 45  | 70.973 | 1645500000 | 1255600000 | 1651600000 | 1701300000  | 1445200000  | 1322800000 |
| sp Q1431 FLNC    | sp Q1431  | 1 | 57 | 44  | 44 | 33  | 291.02 | 3237000000 | 3167000000 | 3341000000 | 3891200000  | 3779600000  | 3842100000 |
| sp Q1431 FKBP8   | sp Q1431  | 1 | 6  | 6   | 6  | 19  | 44.561 | 556710000  | 594100000  | 461280000  | 540020000   | 615530000   | 0          |
| sp Q1432 FAM50A  | sp Q1432  | 2 | 8  | 8   | 8  | 31  | 40.241 | 1056800000 | 1159600000 | 1075400000 | 1020000000  | 1094900000  | 1090500000 |
| sp Q1433 FRG1    | sp Q1433  | 1 | 5  | 5   | 5  | 19  | 29.172 | 290670000  | 345980000  | 0          | 305150000   | 367520000   | 0          |

|                  |          |   |    |    |    |     |        |            |            |            |             |             |            |
|------------------|----------|---|----|----|----|-----|--------|------------|------------|------------|-------------|-------------|------------|
| sp Q1434 GNA13   | sp Q1434 | 1 | 3  | 3  | 3  | 10  | 44.049 | 131110000  | 130170000  | 134080000  | 124510000   | 144400000   | 116840000  |
| sp Q1435 GAMT    | sp Q1435 | 1 | 3  | 3  | 3  | 26  | 26.318 | 50151000   | 0          | 0          | 0           | 0           | 0          |
| sp Q1437 GALE    | sp Q1437 | 1 | 10 | 10 | 10 | 50  | 38.281 | 615790000  | 637270000  | 642870000  | 666890000   | 536820000   | 711930000  |
| sp Q1443 PDE3A   | sp Q1443 | 1 | 14 | 14 | 14 | 22  | 124.98 | 1427400000 | 1448400000 | 1419400000 | 1330000000  | 1272500000  | 1334400000 |
| sp Q1444 CAPRIN1 | sp Q1444 | 1 | 15 | 15 | 15 | 30  | 78.365 | 5255600000 | 5558300000 | 5461500000 | 4149600000  | 3986600000  | 4149700000 |
| sp Q1449 RBM39   | sp Q1449 | 1 | 12 | 12 | 12 | 29  | 59.379 | 1806600000 | 1983600000 | 2070800000 | 1795200000  | 1922400000  | 1777800000 |
| sp Q1452 HLTF    | sp Q1452 | 1 | 5  | 5  | 5  | 8.8 | 113.93 | 111010000  | 0          | 0          | 0           | 0           | 76279000   |
| sp Q1455 PDIA5   | sp Q1455 | 1 | 1  | 1  | 1  | 6.6 | 59.594 | 0          | 0          | 0          | 0           | 0           | 42712000   |
| sp Q1455 PRPSAP1 | sp Q1455 | 1 | 8  | 8  | 7  | 34  | 39.393 | 519290000  | 639230000  | 540900000  | 624350000   | 387240000   | 510370000  |
| sp Q1456 DHX8    | sp Q1456 | 1 | 8  | 7  | 7  | 11  | 139.31 | 179770000  | 240020000  | 157030000  | 174640000   | 141490000   | 153540000  |
| sp Q1456 MCM6    | sp Q1456 | 1 | 29 | 29 | 29 | 40  | 92.888 | 5619700000 | 6406400000 | 5263300000 | 5315300000  | 5522700000  | 4974300000 |
| sp Q1457 ITPR3   | sp Q1457 | 2 | 29 | 29 | 24 | 17  | 304.1  | 1299700000 | 1475200000 | 1486400000 | 1472700000  | 1533700000  | 1725600000 |
| sp Q1464 ITPR1   | sp Q1464 | 1 | 14 | 9  | 9  | 7.9 | 313.93 | 242050000  | 259900000  | 189250000  | 258370000   | 276240000   | 273540000  |
| sp Q1465 PLS1    | sp Q1465 | 1 | 6  | 3  | 3  | 14  | 70.253 | 60733000   | 76098000   | 0          | 70846000    | 43841000    | 73624000   |
| sp Q1465 IRF3    | sp Q1465 | 1 | 2  | 2  | 2  | 7.7 | 47.219 | 0          | 0          | 0          | 71337000    | 81429000    | 71642000   |
| sp Q1466 TRIP12  | sp Q1466 | 1 | 8  | 8  | 8  | 5.6 | 220.43 | 256150000  | 348250000  | 270160000  | 227060000   | 234170000   | 271310000  |
| sp Q1467 PUM1    | sp Q1467 | 2 | 14 | 14 | 14 | 16  | 126.47 | 465210000  | 422900000  | 449060000  | 403740000   | 433290000   | 431140000  |
| sp Q1467 MDC1    | sp Q1467 | 1 | 16 | 16 | 16 | 15  | 226.66 | 582100000  | 546670000  | 568850000  | 374700000   | 567260000   | 579020000  |
| sp Q1467 CLINT1  | sp Q1467 | 1 | 12 | 12 | 12 | 24  | 68.259 | 1698300000 | 1465500000 | 1192600000 | 1316800000  | 1576400000  | 1521100000 |
| sp Q1468 MELK    | sp Q1468 | 1 | 3  | 3  | 3  | 9.1 | 74.641 | 76909000   | 83080000   | 0          | 0           | 70941000    | 80704000   |
| sp Q1468 SMC1A   | sp Q1468 | 1 | 29 | 29 | 29 | 29  | 143.23 | 2063000000 | 2711300000 | 1995500000 | 1830000000  | 1999100000  | 2535400000 |
| sp Q1468 RRP1B   | sp Q1468 | 1 | 12 | 12 | 12 | 23  | 84.427 | 704450000  | 633620000  | 652490000  | 563740000   | 687470000   | 690980000  |
| sp Q1469 PDCD11  | sp Q1469 | 1 | 18 | 18 | 18 | 14  | 208.7  | 767060000  | 847360000  | 760930000  | 844110000   | 797800000   | 818610000  |
| sp Q1469 GINS1   | sp Q1469 | 1 | 2  | 2  | 2  | 15  | 22.988 | 0          | 91644000   | 0          | 0           | 0           | 0          |
| sp Q1469 BMS1    | sp Q1469 | 1 | 13 | 13 | 13 | 14  | 145.81 | 932460000  | 784510000  | 885800000  | 637950000   | 829580000   | 599790000  |
| sp Q1469 USP10   | sp Q1469 | 1 | 10 | 10 | 10 | 23  | 87.133 | 473350000  | 402720000  | 357160000  | 284590000   | 417850000   | 350080000  |
| sp Q1469 MESD    | sp Q1469 | 1 | 8  | 8  | 8  | 43  | 26.076 | 945910000  | 720390000  | 791060000  | 1035000000  | 1142000000  | 1467000000 |
| sp Q1469 GANAB   | sp Q1469 | 1 | 40 | 40 | 40 | 47  | 106.87 | 1.7962E+10 | 1.8981E+10 | 1.7638E+10 | 20766000000 | 18690000000 | 2.1429E+10 |
| sp Q1472 MFSD10  | sp Q1472 | 1 | 1  | 1  | 1  | 2.9 | 48.339 | 0          | 0          | 0          | 0           | 0           | 54598000   |
| sp Q1473 PPP2R5D | sp Q1473 | 2 | 10 | 10 | 7  | 23  | 69.991 | 616960000  | 752810000  | 496120000  | 531500000   | 632150000   | 470480000  |
| sp Q1473 LBR     | sp Q1473 | 1 | 7  | 7  | 7  | 12  | 70.702 | 710030000  | 711100000  | 660290000  | 474820000   | 767140000   | 767910000  |
| sp Q1476 MVP     | sp Q1476 | 1 | 28 | 28 | 28 | 40  | 99.326 | 2885900000 | 2764700000 | 2813700000 | 2579200000  | 2547900000  | 2619300000 |
| sp Q1478 GOLGB1  | sp Q1478 | 1 | 16 | 16 | 16 | 7.6 | 376.01 | 625460000  | 789570000  | 845530000  | 664660000   | 618870000   | 687830000  |
| sp Q1479 CASP8   | sp Q1479 | 1 | 5  | 5  | 5  | 14  | 55.391 | 693930000  | 1138300000 | 1249000000 | 1026900000  | 1045200000  | 1295900000 |
| sp Q1480 KIF22   | sp Q1480 | 1 | 6  | 6  | 6  | 13  | 73.261 | 92878000   | 63083000   | 108560000  | 117780000   | 75278000    | 93178000   |
| sp Q1483 CHD4    | sp Q1483 | 2 | 38 | 38 | 32 | 30  | 218    | 2957800000 | 2863300000 | 3102000000 | 2897400000  | 2988300000  | 2905400000 |
| sp Q1484 LASP1   | sp Q1484 | 1 | 14 | 14 | 14 | 59  | 29.717 | 5426900000 | 5894800000 | 6219400000 | 4646800000  | 6026500000  | 4007900000 |
| sp Q1491 PTGR1   | sp Q1491 | 1 | 13 | 13 | 13 | 45  | 35.869 | 2728400000 | 2242300000 | 1981400000 | 1872100000  | 2332100000  | 2382100000 |
| sp Q1491 DRAP1   | sp Q1491 | 1 | 3  | 3  | 3  | 22  | 22.35  | 210950000  | 186490000  | 284430000  | 179360000   | 193790000   | 228200000  |

|                  |          |   |    |    |    |     |        |            |            |            |             |             |            |
|------------------|----------|---|----|----|----|-----|--------|------------|------------|------------|-------------|-------------|------------|
| sp Q1496 ZNF638  | sp Q1496 | 1 | 6  | 6  | 6  | 3   | 220.62 | 1551300000 | 1398200000 | 1584000000 | 1770200000  | 1975800000  | 1419500000 |
| sp Q1497 KPNB1   | sp Q1497 | 1 | 30 | 30 | 30 | 41  | 97.169 | 1.2228E+10 | 1.3841E+10 | 1.2216E+10 | 13000000000 | 11867000000 | 1.2574E+10 |
| sp Q1497 NOLC1   | sp Q1497 | 1 | 9  | 9  | 9  | 15  | 73.602 | 2078700000 | 1908400000 | 2315100000 | 1781900000  | 1985500000  | 2071900000 |
| sp Q1498 NUMA1   | sp Q1498 | 1 | 71 | 71 | 71 | 47  | 238.26 | 8597700000 | 7875900000 | 8324500000 | 8284100000  | 7682100000  | 7274000000 |
| sp Q1499 PSME4   | sp Q1499 | 1 | 7  | 7  | 7  | 5.3 | 211.33 | 0          | 126120000  | 121090000  | 127900000   | 115690000   | 101870000  |
| sp Q14C8 GAPVD1  | sp Q14C8 | 1 | 22 | 22 | 22 | 23  | 164.98 | 1435300000 | 1553300000 | 1630000000 | 1727000000  | 1688700000  | 1637200000 |
| sp Q14CX NAA25   | sp Q14CX | 1 | 11 | 11 | 11 | 14  | 112.29 | 317260000  | 342650000  | 311270000  | 297980000   | 307380000   | 305360000  |
| sp Q1500 NCAPH   | sp Q1500 | 1 | 15 | 15 | 15 | 31  | 82.562 | 889110000  | 623750000  | 1167500000 | 885080000   | 912400000   | 787740000  |
| sp Q1500 PCLAF   | sp Q1500 | 1 | 1  | 1  | 1  | 16  | 11.986 | 0          | 0          | 24310000   | 0           | 0           | 0          |
| sp Q1500 SPCS2   | sp Q1500 | 1 | 7  | 7  | 7  | 39  | 25.003 | 1014900000 | 1108100000 | 947170000  | 1189500000  | 1342000000  | 1786800000 |
| sp Q1500 EMC2    | sp Q1500 | 1 | 5  | 5  | 5  | 23  | 34.833 | 221040000  | 659010000  | 367720000  | 579310000   | 633180000   | 548100000  |
| sp Q1500 WTAP    | sp Q1500 | 1 | 4  | 4  | 4  | 16  | 44.243 | 198400000  | 216760000  | 220380000  | 177020000   | 225690000   | 209410000  |
| sp Q1500 PSMD6   | sp Q1500 | 1 | 17 | 17 | 17 | 41  | 45.531 | 2587900000 | 2464600000 | 3307100000 | 2633900000  | 2476800000  | 2953400000 |
| sp Q1501 MORF4L2 | sp Q1501 | 1 | 6  | 5  | 5  | 26  | 32.307 | 198270000  | 224160000  | 233510000  | 146530000   | 96786000    | 107780000  |
| sp Q1501 ABRAXAS | sp Q1501 | 1 | 6  | 6  | 6  | 20  | 46.9   | 0          | 141110000  | 185660000  | 0           | 0           | 0          |
| sp Q1501 SEPT2   | sp Q1501 | 1 | 13 | 13 | 13 | 52  | 41.487 | 4062700000 | 4557900000 | 3935400000 | 3789400000  | 4646400000  | 3630600000 |
| sp Q1502 SART3   | sp Q1502 | 1 | 7  | 7  | 7  | 10  | 109.93 | 437440000  | 390120000  | 489140000  | 381410000   | 439280000   | 576220000  |
| sp Q1502 NCAPD2  | sp Q1502 | 1 | 24 | 24 | 24 | 27  | 157.18 | 1969700000 | 1825600000 | 1860800000 | 1681600000  | 1740000000  | 1778700000 |
| sp Q1502 SUZ12   | sp Q1502 | 1 | 2  | 2  | 2  | 6.4 | 83.054 | 77827000   | 0          | 67991000   | 0           | 0           | 53537000   |
| sp Q1502 EXOSC7  | sp Q1502 | 1 | 9  | 9  | 9  | 43  | 31.821 | 1097100000 | 990960000  | 1167100000 | 1160300000  | 1286700000  | 1189600000 |
| sp Q1502 EFTUD2  | sp Q1502 | 1 | 40 | 39 | 39 | 59  | 109.43 | 7607500000 | 7054400000 | 7263200000 | 6844200000  | 6371200000  | 6566600000 |
| sp Q1503 LARS2   | sp Q1503 | 1 | 11 | 11 | 11 | 20  | 101.97 | 272940000  | 403440000  | 355140000  | 412250000   | 467060000   | 353710000  |
| sp Q1503 SNX17   | sp Q1503 | 1 | 4  | 4  | 4  | 15  | 52.901 | 0          | 0          | 0          | 0           | 0           | 69607000   |
| sp Q1504 ARL6IP1 | sp Q1504 | 1 | 2  | 2  | 2  | 8.9 | 23.362 | 0          | 0          | 0          | 0           | 0           | 720140000  |
| sp Q1504 RAB3GAP | sp Q1504 | 1 | 10 | 10 | 10 | 14  | 110.52 | 431630000  | 178790000  | 484340000  | 289130000   | 586090000   | 358430000  |
| sp Q1504 SLC39A1 | sp Q1504 | 1 | 3  | 3  | 3  | 9.1 | 54.212 | 331390000  | 478600000  | 351780000  | 331620000   | 409330000   | 452610000  |
| sp Q1504 KARS    | sp Q1504 | 1 | 20 | 20 | 20 | 43  | 68.047 | 4857600000 | 5420200000 | 4593500000 | 4894800000  | 4151200000  | 5138000000 |
| sp Q1505 RRS1    | sp Q1505 | 1 | 9  | 9  | 9  | 33  | 41.193 | 474370000  | 919070000  | 627750000  | 720880000   | 665290000   | 842520000  |
| sp Q1505 POLDD3  | sp Q1505 | 1 | 3  | 3  | 3  | 9.7 | 51.4   | 182960000  | 203520000  | 233230000  | 157620000   | 202350000   | 226610000  |
| sp Q1505 EIF4H   | sp Q1505 | 1 | 10 | 10 | 10 | 50  | 27.385 | 4759200000 | 4507000000 | 4827800000 | 3430800000  | 4959700000  | 3315500000 |
| sp Q1505 ACAP2   | sp Q1505 | 1 | 1  | 1  | 1  | 2.4 | 88.028 | 0          | 0          | 0          | 0           | 23525000    | 0          |
| sp Q1505 KIF14   | sp Q1505 | 1 | 2  | 2  | 2  | 2.7 | 186.49 | 27820000   | 0          | 30848000   | 20725000    | 54849000    | 24665000   |
| sp Q1506 WDR43   | sp Q1506 | 1 | 11 | 11 | 11 | 26  | 74.89  | 1104800000 | 975270000  | 836180000  | 950180000   | 1202700000  | 791000000  |
| sp Q1506 ACOX1   | sp Q1506 | 1 | 11 | 11 | 11 | 32  | 74.423 | 629470000  | 736180000  | 688320000  | 752930000   | 887770000   | 728750000  |
| sp Q1507 OXA1L   | sp Q1507 | 1 | 3  | 3  | 3  | 7.4 | 48.547 | 127690000  | 332770000  | 266830000  | 136510000   | 198250000   | 223620000  |
| sp Q1507 EEA1    | sp Q1507 | 1 | 9  | 9  | 9  | 9.1 | 162.46 | 208230000  | 225210000  | 188740000  | 183530000   | 227740000   | 0          |
| sp Q1508 PDIA6   | sp Q1508 | 1 | 14 | 14 | 14 | 43  | 48.121 | 5647900000 | 6249200000 | 7077800000 | 7426300000  | 7706000000  | 6647800000 |
| sp Q1510 PAFAH1B | sp Q1510 | 1 | 3  | 3  | 3  | 20  | 25.734 | 347630000  | 161160000  | 317060000  | 326500000   | 220630000   | 338230000  |
| sp Q1512 PEA15   | sp Q1512 | 1 | 5  | 5  | 5  | 62  | 15.04  | 240820000  | 350760000  | 258680000  | 239480000   | 205480000   | 231210000  |

|                  |          |   |    |     |    |     |        |            |            |            |             |             |            |
|------------------|----------|---|----|-----|----|-----|--------|------------|------------|------------|-------------|-------------|------------|
| sp Q1512 EBP     | sp Q1512 | 1 | 3  | 3   | 3  | 17  | 26.352 | 2858100000 | 2846900000 | 2521100000 | 2487200000  | 2697700000  | 2224700000 |
| sp Q1512 PMVK    | sp Q1512 | 1 | 9  | 9   | 9  | 46  | 21.995 | 726690000  | 854130000  | 725180000  | 619560000   | 680010000   | 848450000  |
| sp Q1514 PLEC    | sp Q1514 | 1 | ## | 262 | ## | 58  | 531.78 | 1.1136E+11 | 1.254E+11  | 1.1758E+11 | 1.2391E+11  | 1.271E+11   | 1.2998E+11 |
| sp Q1515 PCM1    | sp Q1515 | 1 | 2  | 2   | 2  | 1.4 | 228.54 | 0          | 0          | 62506000   | 0           | 0           | 73868000   |
| sp Q1515 NOMO1   | sp Q1515 | 1 | 19 | 2   | 2  | 24  | 134.32 | 0          | 0          | 0          | 0           | 0           | 34001000   |
| sp Q1516 PON2    | sp Q1516 | 1 | 4  | 4   | 4  | 20  | 39.38  | 441340000  | 587470000  | 498690000  | 448100000   | 601040000   | 562700000  |
| sp Q1518 PPA1    | sp Q1518 | 1 | 18 | 18  | 18 | 70  | 32.66  | 6199700000 | 6557800000 | 6652300000 | 5676100000  | 5850100000  | 5454700000 |
| sp Q1518 PTGES3  | sp Q1518 | 1 | 7  | 7   | 7  | 51  | 18.697 | 7149400000 | 6792400000 | 7871600000 | 7023100000  | 7297100000  | 7272300000 |
| sp Q1520 STK38   | sp Q1520 | 2 | 4  | 4   | 4  | 10  | 54.19  | 124900000  | 110580000  | 107220000  | 102900000   | 97170000    | 113700000  |
| sp Q1523 NONO    | sp Q1523 | 1 | 25 | 24  | 23 | 60  | 54.231 | 1.8766E+10 | 1.8096E+10 | 1.7436E+10 | 17651000000 | 17992000000 | 2.0657E+10 |
| sp Q1525 PTPA    | sp Q1525 | 1 | 10 | 10  | 10 | 44  | 40.667 | 1008300000 | 969220000  | 690940000  | 898880000   | 819790000   | 465540000  |
| sp Q1526 PTPRK   | sp Q1526 | 1 | 1  | 1   | 1  | 1   | 162.1  | 0          | 0          | 0          | 0           | 30331000    | 0          |
| sp Q1526 PWP2    | sp Q1526 | 1 | 13 | 13  | 13 | 21  | 102.45 | 611490000  | 728700000  | 538160000  | 512700000   | 612830000   | 623250000  |
| sp Q1527 RABEP1  | sp Q1527 | 1 | 4  | 4   | 4  | 6.7 | 99.289 | 97771000   | 154150000  | 0          | 146850000   | 214250000   | 0          |
| sp Q1528 RAB35   | sp Q1528 | 1 | 4  | 4   | 4  | 24  | 23.025 | 617400000  | 672520000  | 511130000  | 1101900000  | 484750000   | 440800000  |
| sp Q1528 RNPS1   | sp Q1528 | 1 | 6  | 6   | 6  | 26  | 34.208 | 887520000  | 826370000  | 768080000  | 860650000   | 839720000   | 872640000  |
| sp Q1529 RBBP5   | sp Q1529 | 1 | 3  | 3   | 3  | 10  | 59.152 | 184240000  | 162450000  | 127150000  | 117280000   | 0           | 116430000  |
| sp Q1529 RCN1    | sp Q1529 | 1 | 15 | 15  | 15 | 65  | 38.89  | 3709400000 | 4903200000 | 4117600000 | 4988900000  | 5148800000  | 4758100000 |
| sp Q1536 TMED2   | sp Q1536 | 1 | 4  | 4   | 4  | 18  | 22.761 | 1036700000 | 628540000  | 1099000000 | 1227200000  | 887700000   | 1348600000 |
| sp Q1536 PCBP1   | sp Q1536 | 2 | 13 | 13  | 9  | 60  | 37.497 | 1.4357E+10 | 1.6546E+10 | 1.4434E+10 | 14598000000 | 16036000000 | 1.7989E+10 |
| sp Q1536 PCBP2   | sp Q1536 | 2 | 12 | 8   | 8  | 47  | 38.58  | 8167800000 | 6987800000 | 7629400000 | 7808600000  | 8200600000  | 8306100000 |
| sp Q1536 ELOC    | sp Q1536 | 1 | 7  | 7   | 7  | 66  | 12.473 | 3005700000 | 2968600000 | 1940300000 | 2379500000  | 3360500000  | 2818000000 |
| sp Q1537 ELOB    | sp Q1537 | 1 | 7  | 7   | 7  | 83  | 13.133 | 2346300000 | 1745800000 | 2677100000 | 2105300000  | 3231200000  | 1852200000 |
| sp Q1538 RHEB    | sp Q1538 | 1 | 7  | 7   | 7  | 36  | 20.497 | 545620000  | 589770000  | 591120000  | 577140000   | 635850000   | 530780000  |
| sp Q1538 UBE3C   | sp Q1538 | 1 | 6  | 6   | 6  | 8.5 | 123.92 | 100850000  | 85109000   | 82554000   | 80026000    | 79848000    | 82333000   |
| sp Q1538 TOMM20  | sp Q1538 | 1 | 1  | 1   | 1  | 9   | 16.298 | 0          | 0          | 0          | 0           | 0           | 282350000  |
| sp Q1539 DHCR24  | sp Q1539 | 1 | 6  | 6   | 6  | 13  | 60.101 | 851110000  | 1006000000 | 908970000  | 961230000   | 791050000   | 700660000  |
| sp Q1539 SF3B3   | sp Q1539 | 1 | 31 | 31  | 31 | 36  | 135.58 | 3993900000 | 3468500000 | 3906100000 | 4096500000  | 3816300000  | 3638500000 |
| sp Q1539 PUM3    | sp Q1539 | 1 | 14 | 14  | 14 | 30  | 73.584 | 659890000  | 701660000  | 617070000  | 596990000   | 370380000   | 608900000  |
| sp Q1540 RSU1    | sp Q1540 | 1 | 8  | 8   | 8  | 37  | 31.54  | 581380000  | 722660000  | 601100000  | 637870000   | 659890000   | 636740000  |
| sp Q1541 CNN3    | sp Q1541 | 1 | 11 | 10  | 10 | 48  | 36.413 | 947440000  | 727660000  | 458220000  | 508740000   | 755100000   | 317610000  |
| sp Q1541 RPS6KA1 | sp Q1541 | 1 | 12 | 8   | 7  | 22  | 82.722 | 338730000  | 233670000  | 471200000  | 333790000   | 257590000   | 379860000  |
| sp Q1542 SAFB    | sp Q1542 | 1 | 19 | 19  | 11 | 22  | 102.64 | 2397600000 | 2310000000 | 2699200000 | 2489600000  | 2599600000  | 2326600000 |
| sp Q1542 SF3B4   | sp Q1542 | 1 | 1  | 1   | 1  | 3.3 | 44.385 | 0          | 0          | 0          | 264590000   | 0           | 0          |
| sp Q1542 SF3A2   | sp Q1542 | 1 | 7  | 7   | 7  | 23  | 49.255 | 1551100000 | 1803900000 | 1231800000 | 1306100000  | 1510900000  | 2052300000 |
| sp Q1543 PPP1R7  | sp Q1543 | 1 | 8  | 8   | 8  | 30  | 41.564 | 242490000  | 334180000  | 249640000  | 446900000   | 255900000   | 265840000  |
| sp Q1543 SEC23A  | sp Q1543 | 1 | 18 | 18  | 16 | 33  | 86.16  | 2079600000 | 2397900000 | 2095900000 | 2300700000  | 2153300000  | 2175700000 |
| sp Q1543 SEC23B  | sp Q1543 | 1 | 13 | 11  | 11 | 24  | 86.478 | 556740000  | 536900000  | 589780000  | 463060000   | 469550000   | 477240000  |
| sp Q1545 SF3A1   | sp Q1545 | 1 | 24 | 24  | 24 | 36  | 88.885 | 3932400000 | 3432500000 | 3775500000 | 3875300000  | 4023100000  | 3879400000 |



|                  |          |   |    |    |    |     |        |            |            |            |            |            |            |
|------------------|----------|---|----|----|----|-----|--------|------------|------------|------------|------------|------------|------------|
| sp Q1547 SKIV2L  | sp Q1547 | 1 | 7  | 7  | 7  | 11  | 137.75 | 152720000  | 257300000  | 309940000  | 384400000  | 315700000  | 195880000  |
| sp Q1552 SURF1   | sp Q1552 | 1 | 4  | 4  | 4  | 21  | 33.331 | 208800000  | 275550000  | 396540000  | 148460000  | 83683000   | 151750000  |
| sp Q1553 SS18    | sp Q1553 | 1 | 1  | 1  | 1  | 1.9 | 45.929 | 0          | 0          | 17549000   | 0          | 0          | 0          |
| sp Q1555 MAPRE2  | sp Q1555 | 1 | 4  | 4  | 4  | 18  | 37.031 | 302630000  | 272960000  | 275060000  | 255820000  | 358910000  | 278170000  |
| sp Q1558 TGFB1   | sp Q1558 | 1 | 7  | 7  | 7  | 16  | 74.68  | 322480000  | 366130000  | 455410000  | 278580000  | 289670000  | 243250000  |
| sp Q1559 SLC9A3R | sp Q1559 | 1 | 6  | 6  | 6  | 22  | 37.413 | 236330000  | 185590000  | 197580000  | 183230000  | 248370000  | 276280000  |
| sp Q1563 TSN     | sp Q1563 | 1 | 8  | 8  | 8  | 42  | 26.183 | 1284900000 | 1343400000 | 990610000  | 1118800000 | 1135200000 | 1091000000 |
| sp Q1563 SF1     | sp Q1563 | 1 | 13 | 13 | 13 | 31  | 68.329 | 2074000000 | 2095300000 | 2262500000 | 2077100000 | 2299900000 | 2144600000 |
| sp Q1564 TRIP10  | sp Q1564 | 1 | 8  | 8  | 8  | 21  | 68.351 | 374550000  | 378210000  | 335350000  | 453100000  | 411710000  | 281540000  |
| sp Q1564 TRIP11  | sp Q1564 | 1 | 3  | 3  | 3  | 1.7 | 227.58 | 0          | 0          | 0          | 0          | 0          | 161980000  |
| sp Q1564 TRIP13  | sp Q1564 | 1 | 16 | 16 | 16 | 40  | 48.55  | 4718600000 | 3503400000 | 4522300000 | 4639800000 | 4777000000 | 4780300000 |
| sp Q1564 OASL    | sp Q1564 | 1 | 4  | 4  | 4  | 12  | 59.225 | 0          | 84126000   | 0          | 79637000   | 0          | 0          |
| sp Q1565 TRIP4   | sp Q1565 | 1 | 6  | 6  | 6  | 15  | 66.145 | 91270000   | 0          | 106870000  | 0          | 103860000  | 97237000   |
| sp Q1565 TRIP6   | sp Q1565 | 1 | 15 | 15 | 15 | 59  | 50.287 | 1835800000 | 2088500000 | 1797200000 | 1798400000 | 1836200000 | 1943300000 |
| sp Q1569 MAPRE1  | sp Q1569 | 2 | 14 | 14 | 14 | 56  | 29.999 | 3952700000 | 3283100000 | 3940100000 | 3590900000 | 3548900000 | 4272000000 |
| sp Q1571 TSC22D1 | sp Q1571 | 1 | 1  | 1  | 1  | 1.1 | 109.68 | 0          | 0          | 0          | 0          | 0          | 17695000   |
| sp Q1571 ELAVL1  | sp Q1571 | 1 | 9  | 9  | 9  | 33  | 36.091 | 2868500000 | 2560000000 | 2705800000 | 2961000000 | 2998500000 | 2723200000 |
| sp Q1573 NSDHL   | sp Q1573 | 1 | 8  | 8  | 8  | 31  | 41.9   | 890090000  | 934900000  | 838140000  | 851520000  | 800900000  | 870310000  |
| sp Q1574 MYLK    | sp Q1574 | 1 | 1  | 1  | 1  | 0.4 | 210.71 | 0          | 0          | 0          | 0          | 0          | 43787000   |
| sp Q1575 TAB1    | sp Q1575 | 1 | 1  | 1  | 1  | 2.2 | 54.643 | 0          | 0          | 0          | 0          | 0          | 32282000   |
| sp Q1575 SLC1A5  | sp Q1575 | 1 | 11 | 11 | 11 | 31  | 56.598 | 1942600000 | 2197900000 | 2425200000 | 2534100000 | 2925600000 | 2607300000 |
| sp Q1577 MLF2    | sp Q1577 | 1 | 3  | 3  | 3  | 16  | 28.147 | 0          | 0          | 0          | 0          | 0          | 115370000  |
| sp Q1578 TOMM34  | sp Q1578 | 1 | 15 | 15 | 15 | 58  | 34.559 | 1464800000 | 1499600000 | 1575200000 | 1633000000 | 1769900000 | 1589900000 |
| sp Q1579 SMAD2   | sp Q1579 | 1 | 4  | 4  | 2  | 11  | 52.306 | 147830000  | 145790000  | 160890000  | 152130000  | 183420000  | 169090000  |
| sp Q1580 MSMO1   | sp Q1580 | 1 | 1  | 1  | 1  | 4.8 | 35.215 | 0          | 0          | 0          | 19500000   | 0          | 0          |
| sp Q1581 TBCE    | sp Q1581 | 1 | 6  | 6  | 6  | 17  | 59.345 | 97647000   | 227480000  | 170450000  | 126430000  | 0          | 0          |
| sp Q1581 TBCC    | sp Q1581 | 1 | 4  | 4  | 4  | 27  | 39.248 | 0          | 92821000   | 0          | 91091000   | 83380000   | 77929000   |
| sp Q1583 STXBP2  | sp Q1583 | 1 | 3  | 3  | 3  | 8.1 | 66.452 | 0          | 0          | 0          | 130780000  | 0          | 0          |
| sp Q1583 VAMP3   | sp Q1583 | 3 | 4  | 4  | 4  | 52  | 11.309 | 1441800000 | 924540000  | 900520000  | 1065100000 | 1448700000 | 1496100000 |
| sp Q1584 NEDD8   | sp Q1584 | 1 | 2  | 2  | 2  | 17  | 9.0714 | 0          | 711680000  | 740240000  | 0          | 417150000  | 0          |
| sp Q1590 ATP6AP1 | sp Q1590 | 1 | 6  | 6  | 6  | 16  | 52.025 | 241820000  | 145500000  | 188020000  | 130240000  | 188990000  | 197590000  |
| sp Q1590 RAB11B  | sp Q1590 | 2 | 13 | 13 | 13 | 61  | 24.488 | 3023000000 | 2997300000 | 3214000000 | 4008600000 | 3794500000 | 2842100000 |
| sp Q1594 ZYX     | sp Q1594 | 1 | 19 | 19 | 19 | 56  | 61.277 | 5669900000 | 5296300000 | 5034900000 | 5038500000 | 4560100000 | 4203500000 |
| sp Q1613 ETFDH   | sp Q1613 | 1 | 2  | 2  | 2  | 3.9 | 68.495 | 0          | 0          | 0          | 0          | 0          | 72583000   |
| sp Q1618 SEPT7   | sp Q1618 | 2 | 13 | 13 | 13 | 33  | 50.679 | 4454400000 | 4436000000 | 4212300000 | 3481200000 | 3449500000 | 3432000000 |
| sp Q1618 ADRM1   | sp Q1618 | 1 | 6  | 6  | 6  | 20  | 42.153 | 770390000  | 662720000  | 650940000  | 614900000  | 695820000  | 564160000  |
| sp Q1620 CCDC6   | sp Q1620 | 1 | 12 | 12 | 12 | 34  | 53.29  | 692720000  | 670870000  | 720270000  | 579510000  | 734720000  | 663700000  |
| sp Q1622 UAP1    | sp Q1622 | 1 | 9  | 9  | 8  | 23  | 58.768 | 693090000  | 611710000  | 866760000  | 609740000  | 729710000  | 736280000  |
| sp Q1627 IGFBP7  | sp Q1627 | 1 | 3  | 3  | 3  | 18  | 29.13  | 201220000  | 261790000  | 215000000  | 162280000  | 212200000  | 215780000  |

|                  |          |   |    |    |    |     |        |            |            |            |             |             |            |
|------------------|----------|---|----|----|----|-----|--------|------------|------------|------------|-------------|-------------|------------|
| sp Q1640 PSMD5   | sp Q1640 | 1 | 20 | 20 | 20 | 56  | 56.195 | 3184600000 | 3663500000 | 4364700000 | 3606200000  | 3784300000  | 3486100000 |
| sp Q1651 PKN2    | sp Q1651 | 1 | 13 | 13 | 13 | 23  | 112.03 | 636110000  | 592300000  | 577400000  | 597820000   | 642650000   | 525650000  |
| sp Q1652 CSRP2   | sp Q1652 | 1 | 3  | 3  | 3  | 18  | 20.954 | 156360000  | 233590000  | 160390000  | 135340000   | 0           | 151500000  |
| sp Q1653 DDB1    | sp Q1653 | 1 | 36 | 36 | 36 | 38  | 126.97 | 4485000000 | 4132400000 | 4129000000 | 3441800000  | 3053300000  | 3857800000 |
| sp Q1653 PPP2R5E | sp Q1653 | 1 | 4  | 3  | 3  | 11  | 54.699 | 307140000  | 191510000  | 249040000  | 161800000   | 187550000   | 168850000  |
| sp Q1653 MAPK14  | sp Q1653 | 1 | 6  | 6  | 6  | 23  | 41.293 | 197390000  | 201480000  | 207360000  | 182860000   | 216270000   | 230620000  |
| sp Q1654 CDC37   | sp Q1654 | 1 | 11 | 11 | 11 | 33  | 44.468 | 3733600000 | 3352000000 | 3185500000 | 3340900000  | 3629500000  | 3239700000 |
| sp Q1655 DPYSL2  | sp Q1655 | 1 | 19 | 16 | 15 | 45  | 62.293 | 3751000000 | 2987700000 | 3852200000 | 3125300000  | 3168600000  | 2811100000 |
| sp Q1656 SYPL1   | sp Q1656 | 1 | 3  | 3  | 3  | 20  | 28.565 | 441240000  | 556880000  | 511120000  | 424250000   | 548320000   | 482840000  |
| sp Q1657 RBBP7   | sp Q1657 | 1 | 14 | 14 | 10 | 45  | 47.82  | 5557800000 | 6506900000 | 5549600000 | 4711000000  | 5449600000  | 5219000000 |
| sp Q1659 FXN     | sp Q1659 | 1 | 2  | 2  | 2  | 13  | 23.135 | 0          | 0          | 0          | 0           | 0           | 91802000   |
| sp Q1661 BAK1    | sp Q1661 | 1 | 1  | 1  | 1  | 16  | 23.408 | 0          | 0          | 0          | 0           | 0           | 36470000   |
| sp Q1662 MEA1    | sp Q1662 | 1 | 2  | 2  | 2  | 16  | 19.904 | 0          | 0          | 0          | 0           | 0           | 138130000  |
| sp Q1662 SRSF7   | sp Q1662 | 1 | 6  | 5  | 5  | 25  | 27.366 | 2310300000 | 1363300000 | 2362300000 | 2805300000  | 3009200000  | 2552100000 |
| sp Q1663 CPSF6   | sp Q1663 | 1 | 9  | 9  | 9  | 23  | 59.209 | 1361200000 | 1510500000 | 1386500000 | 1400700000  | 1249800000  | 1654700000 |
| sp Q1663 SMN1    | sp Q1663 | 1 | 5  | 5  | 5  | 31  | 31.848 | 247550000  | 364430000  | 363430000  | 238870000   | 314960000   | 321710000  |
| sp Q1664 DBN1    | sp Q1664 | 1 | 16 | 16 | 16 | 38  | 71.428 | 3905900000 | 3444600000 | 3380000000 | 2786100000  | 3471700000  | 3168700000 |
| sp Q1664 MAPKAPK | sp Q1664 | 2 | 2  | 2  | 2  | 8.1 | 42.987 | 0          | 108260000  | 0          | 0           | 107860000   | 125930000  |
| sp Q1665 FSCN1   | sp Q1665 | 1 | 27 | 27 | 27 | 62  | 54.529 | 2.3897E+10 | 2.6226E+10 | 2.3974E+10 | 24355000000 | 21623000000 | 2.3893E+10 |
| sp Q1666 IFI16   | sp Q1666 | 2 | 15 | 15 | 15 | 26  | 88.255 | 1251300000 | 1229400000 | 1114500000 | 1696100000  | 1109300000  | 1418600000 |
| sp Q1669 DECR1   | sp Q1669 | 1 | 6  | 6  | 6  | 23  | 36.067 | 671580000  | 470270000  | 576350000  | 672810000   | 634800000   | 589910000  |
| sp Q1670 MAN2A1  | sp Q1670 | 1 | 3  | 3  | 3  | 3.1 | 131.14 | 102670000  | 0          | 0          | 0           | 0           | 0          |
| sp Q1671 NDUFA5  | sp Q1671 | 1 | 5  | 5  | 5  | 66  | 13.459 | 431740000  | 538920000  | 416940000  | 425400000   | 536240000   | 475570000  |
| sp Q1671 KYNU    | sp Q1671 | 1 | 20 | 20 | 20 | 50  | 52.351 | 5689900000 | 6661200000 | 6348000000 | 5869000000  | 5506400000  | 6121500000 |
| sp Q1674 CLPP    | sp Q1674 | 1 | 5  | 5  | 5  | 27  | 30.18  | 379030000  | 298560000  | 351880000  | 317490000   | 498210000   | 491280000  |
| sp Q1676 TST     | sp Q1676 | 1 | 3  | 3  | 3  | 15  | 33.429 | 0          | 0          | 113690000  | 0           | 0           | 0          |
| sp Q1676 UBE2S   | sp Q1676 | 1 | 7  | 7  | 7  | 45  | 23.845 | 354490000  | 302530000  | 217080000  | 211240000   | 230240000   | 404150000  |
| sp Q1677 GUK1    | sp Q1677 | 1 | 5  | 5  | 5  | 33  | 21.725 | 0          | 294580000  | 172500000  | 0           | 427820000   | 161480000  |
| sp Q1677 HAGH    | sp Q1677 | 1 | 3  | 3  | 3  | 9.4 | 33.805 | 0          | 0          | 0          | 77083000    | 0           | 0          |
| sp Q1679 NDUFA9  | sp Q1679 | 1 | 7  | 7  | 7  | 25  | 42.509 | 498360000  | 655350000  | 619430000  | 359160000   | 300670000   | 299820000  |
| sp Q1679 ME3     | sp Q1679 | 1 | 2  | 2  | 2  | 6   | 67.068 | 0          | 25432000   | 0          | 33162000    | 23515000    | 21258000   |
| sp Q1682 PCK2    | sp Q1682 | 2 | 9  | 9  | 9  | 23  | 70.698 | 226240000  | 186300000  | 261830000  | 340140000   | 352210000   | 342520000  |
| sp Q1683 UPP1    | sp Q1683 | 1 | 1  | 1  | 1  | 3.2 | 33.934 | 0          | 0          | 0          | 0           | 0           | 27968000   |
| sp Q1683 HADH    | sp Q1683 | 1 | 10 | 10 | 10 | 40  | 34.293 | 1138100000 | 1962300000 | 1065800000 | 1243400000  | 1237500000  | 1545500000 |
| sp Q1685 CYP51A1 | sp Q1685 | 1 | 8  | 8  | 8  | 19  | 56.805 | 402590000  | 340070000  | 474110000  | 311690000   | 326160000   | 294150000  |
| sp Q1685 UGP2    | sp Q1685 | 1 | 12 | 12 | 12 | 30  | 56.94  | 1461500000 | 1508000000 | 1684400000 | 1601100000  | 1817700000  | 1605400000 |
| sp Q1688 UGT8    | sp Q1688 | 1 | 2  | 2  | 2  | 4.6 | 61.437 | 72588000   | 57474000   | 84832000   | 58270000    | 0           | 0          |
| sp Q1688 TXNRD1  | sp Q1688 | 1 | 27 | 27 | 26 | 50  | 70.905 | 1.3338E+10 | 1.3386E+10 | 1.3355E+10 | 15066000000 | 13286000000 | 1.2877E+10 |
| sp Q1689 TPD52L1 | sp Q1689 | 1 | 3  | 3  | 3  | 27  | 22.449 | 242960000  | 140850000  | 150460000  | 0           | 0           | 0          |

|                  |          |   |    |    |    |     |        |            |            |            |             |             |            |
|------------------|----------|---|----|----|----|-----|--------|------------|------------|------------|-------------|-------------|------------|
| sp Q1689 IMMT    | sp Q1689 | 1 | 26 | 26 | 26 | 49  | 83.677 | 5125600000 | 4736100000 | 4028000000 | 5330600000  | 6021100000  | 5848600000 |
| sp Q17RY LY6K    | sp Q17RY | 1 | 2  | 2  | 2  | 13  | 18.673 | 124730000  | 159610000  | 0          | 0           | 0           | 0          |
| sp Q1ED3 KNOP1   | sp Q1ED3 | 1 | 2  | 2  | 2  | 5.5 | 51.588 | 0          | 0          | 0          | 0           | 0           | 115230000  |
| sp Q1KMT HNRNPU  | sp Q1KMT | 1 | 23 | 23 | 23 | 36  | 85.104 | 4177200000 | 4308200000 | 4072200000 | 4583500000  | 4275600000  | 3934500000 |
| sp Q27J8 INF2    | sp Q27J8 | 1 | 21 | 21 | 21 | 30  | 135.62 | 1095200000 | 986090000  | 974490000  | 877940000   | 1035700000  | 1013700000 |
| sp Q2996 HLA-C   | sp Q2996 | 4 | 12 | 9  | 0  | 46  | 40.968 | 1705500000 | 1473100000 | 1526400000 | 1573600000  | 1692100000  | 2128700000 |
| sp Q29RF PDS5A   | sp Q29RF | 1 | 22 | 22 | 20 | 23  | 150.83 | 951380000  | 1298300000 | 1165400000 | 1058200000  | 1130100000  | 883760000  |
| sp Q2KHF QSER1   | sp Q2KHF | 1 | 2  | 2  | 2  | 2.3 | 189.97 | 0          | 0          | 0          | 14429000    | 13751000    | 14539000   |
| sp Q2M2I AAK1    | sp Q2M2I | 1 | 3  | 3  | 3  | 7.5 | 103.88 | 0          | 108120000  | 180230000  | 0           | 0           | 242370000  |
| sp Q2M38 WASHC4  | sp Q2M38 | 1 | 6  | 6  | 6  | 7.1 | 136.4  | 83266000   | 63548000   | 85578000   | 102850000   | 87881000    | 94390000   |
| sp Q2NL8 TSR1    | sp Q2NL8 | 1 | 15 | 15 | 15 | 27  | 91.809 | 896600000  | 904580000  | 838290000  | 845800000   | 663510000   | 838030000  |
| sp Q2PZI DPY19L1 | sp Q2PZI | 2 | 3  | 3  | 3  | 6.7 | 77.318 | 0          | 0          | 0          | 102890000   | 102430000   | 0          |
| sp Q2TAA IAH1    | sp Q2TAA | 1 | 1  | 1  | 1  | 6.5 | 27.598 | 0          | 0          | 0          | 0           | 0           | 10880000   |
| sp Q2TAL QRICH1  | sp Q2TAL | 1 | 9  | 9  | 9  | 18  | 86.435 | 239650000  | 398450000  | 267570000  | 557370000   | 405340000   | 377840000  |
| sp Q2TAY SMU1    | sp Q2TAY | 1 | 15 | 15 | 15 | 44  | 57.543 | 1723200000 | 1997900000 | 1882400000 | 1350100000  | 1157900000  | 1446600000 |
| sp Q2VPK CTU2    | sp Q2VPK | 1 | 2  | 2  | 2  | 6.4 | 56.107 | 0          | 0          | 0          | 0           | 38485000    | 0          |
| sp Q32MZ LRRFIP1 | sp Q32MZ | 1 | 12 | 12 | 11 | 22  | 89.252 | 1823700000 | 1452900000 | 1393400000 | 1511000000  | 1568400000  | 1751400000 |
| sp Q32P2 P3H1    | sp Q32P2 | 1 | 17 | 17 | 16 | 33  | 83.393 | 1247800000 | 1226100000 | 1012100000 | 1090400000  | 1103700000  | 1159600000 |
| sp Q32P4 TRMT5   | sp Q32P4 | 1 | 1  | 1  | 1  | 2.9 | 58.246 | 0          | 0          | 0          | 0           | 0           | 55699000   |
| sp Q3B72 TWISTNB | sp Q3B72 | 1 | 1  | 1  | 1  | 4.7 | 37.432 | 0          | 0          | 0          | 0           | 0           | 137960000  |
| sp Q3KQL MAP7D1  | sp Q3KQL | 1 | 8  | 8  | 8  | 16  | 92.819 | 478070000  | 404350000  | 442650000  | 431890000   | 499580000   | 380220000  |
| sp Q3LXA TKFC    | sp Q3LXA | 1 | 5  | 5  | 5  | 17  | 58.946 | 215100000  | 180520000  | 154170000  | 200930000   | 188490000   | 157560000  |
| sp Q3MHI LSM12   | sp Q3MHI | 1 | 2  | 2  | 2  | 12  | 21.701 | 269480000  | 354650000  | 303110000  | 339770000   | 401600000   | 345550000  |
| sp Q3SXM HSDL1   | sp Q3SXM | 1 | 1  | 1  | 1  | 3.3 | 37.001 | 0          | 0          | 0          | 0           | 0           | 33231000   |
| sp Q3V6T CCDC88A | sp Q3V6T | 1 | 3  | 3  | 3  | 1.7 | 216.04 | 126830000  | 0          | 0          | 0           | 0           | 144490000  |
| sp Q3YEC RABL6   | sp Q3YEC | 1 | 4  | 4  | 4  | 7.3 | 79.548 | 0          | 0          | 0          | 0           | 209790000   | 0          |
| sp Q3ZAC VMA21   | sp Q3ZAC | 1 | 1  | 1  | 1  | 12  | 11.354 | 0          | 125360000  | 0          | 0           | 0           | 0          |
| sp Q3ZCN TUBB8   | sp Q3ZCN | 1 | 10 | 2  | 2  | 25  | 49.775 | 1.3874E+10 | 1.5187E+10 | 9164300000 | 13379000000 | 13805000000 | 1.0997E+10 |
| sp Q3ZCC TIMM50  | sp Q3ZCC | 1 | 7  | 7  | 7  | 27  | 39.646 | 628120000  | 778510000  | 640540000  | 623080000   | 771110000   | 595320000  |
| sp Q49A2 GLYR1   | sp Q49A2 | 1 | 6  | 6  | 6  | 16  | 60.556 | 181860000  | 199780000  | 248390000  | 170570000   | 259510000   | 221850000  |
| sp Q49AR C5orf22 | sp Q49AR | 1 | 2  | 2  | 2  | 12  | 49.967 | 0          | 0          | 25183000   | 0           | 0           | 0          |
| sp Q4G0F VPS26B  | sp Q4G0F | 1 | 1  | 1  | 1  | 3.3 | 39.154 | 0          | 0          | 0          | 0           | 20308000    | 0          |
| sp Q4G0J LARP7   | sp Q4G0J | 1 | 6  | 6  | 6  | 13  | 66.898 | 223690000  | 153340000  | 177320000  | 197280000   | 248800000   | 216570000  |
| sp Q4G0N NADK2   | sp Q4G0N | 1 | 7  | 7  | 7  | 24  | 49.432 | 702140000  | 568040000  | 708390000  | 631830000   | 618390000   | 889240000  |
| sp Q4J6C PREPL   | sp Q4J6C | 1 | 5  | 5  | 5  | 12  | 83.926 | 132340000  | 121470000  | 210910000  | 103340000   | 109160000   | 0          |
| sp Q4KMF TBC1D10 | sp Q4KMF | 1 | 2  | 2  | 2  | 5.7 | 87.198 | 110900000  | 209650000  | 0          | 0           | 0           | 0          |
| sp Q4KMC ANO6    | sp Q4KMC | 1 | 1  | 1  | 1  | 2.4 | 106.16 | 0          | 0          | 0          | 0           | 0           | 47713000   |
| sp Q4KWI PLCH1   | sp Q4KWI | 1 | 2  | 2  | 2  | 2.6 | 189.22 | 0          | 371370000  | 0          | 0           | 0           | 0          |
| sp Q4V32 GRIPAP1 | sp Q4V32 | 1 | 9  | 9  | 9  | 21  | 95.988 | 161630000  | 121120000  | 124800000  | 170530000   | 199120000   | 113480000  |

|           |         |           |   |    |    |    |     |        |            |            |            |            |            |            |
|-----------|---------|-----------|---|----|----|----|-----|--------|------------|------------|------------|------------|------------|------------|
| sp Q4VC3  | CCDC58  | sp Q4VC3  | 1 | 4  | 4  | 4  | 37  | 16.62  | 364620000  | 280410000  | 182730000  | 323630000  | 441810000  | 206030000  |
| sp Q52LJ0 | FAM98B  | sp Q52LJ0 | 1 | 6  | 6  | 6  | 30  | 37.19  | 740640000  | 666530000  | 613080000  | 992250000  | 1118900000 | 710820000  |
| sp Q53EL  | PDCD4   | sp Q53EL  | 1 | 11 | 11 | 11 | 33  | 51.735 | 1445700000 | 1604300000 | 1474800000 | 540070000  | 570580000  | 534590000  |
| sp Q53EP  | FNDC3B  | sp Q53EP  | 1 | 5  | 5  | 5  | 6.6 | 132.89 | 294490000  | 252520000  | 326420000  | 237970000  | 211570000  | 270540000  |
| sp Q53F1  | NCBP3   | sp Q53F1  | 1 | 1  | 1  | 1  | 2.1 | 70.592 | 0          | 0          | 49910000   | 0          | 0          | 0          |
| sp Q53FT  | HIKESHI | sp Q53FT  | 1 | 2  | 2  | 2  | 15  | 21.627 | 0          | 0          | 0          | 108770000  | 0          | 0          |
| sp Q9P0S  | ORMDL1  | sp Q9P0S  | 3 | 2  | 2  | 2  | 17  | 17.371 | 270660000  | 302310000  | 291340000  | 398350000  | 330170000  | 376540000  |
| sp Q53G4  | IFI44L  | sp Q53G4  | 1 | 2  | 2  | 2  | 6.2 | 51.322 | 0          | 0          | 0          | 0          | 492810000  | 0          |
| sp Q53GC  | HSD17B1 | sp Q53GC  | 1 | 6  | 6  | 6  | 25  | 34.324 | 641000000  | 678100000  | 598870000  | 602720000  | 661830000  | 815970000  |
| sp Q53GS  | GLE1    | sp Q53GS  | 1 | 3  | 3  | 3  | 7.4 | 79.835 | 0          | 0          | 0          | 0          | 0          | 47206000   |
| sp Q53GS  | USP39   | sp Q53GS  | 1 | 9  | 9  | 9  | 23  | 65.38  | 838410000  | 655920000  | 830280000  | 718850000  | 797750000  | 693540000  |
| sp Q53H1  | AGK     | sp Q53H1  | 1 | 7  | 7  | 7  | 26  | 47.137 | 294610000  | 404130000  | 279640000  | 358230000  | 359760000  | 182100000  |
| sp Q53H8  | LACTB2  | sp Q53H8  | 1 | 2  | 2  | 2  | 6.9 | 32.805 | 0          | 0          | 0          | 0          | 0          | 38573000   |
| sp Q53H9  | PYCR3   | sp Q53H9  | 1 | 6  | 6  | 6  | 33  | 28.663 | 0          | 0          | 0          | 0          | 0          | 194000000  |
| sp Q53HC  | EIPR1   | sp Q53HC  | 1 | 3  | 3  | 3  | 11  | 43.603 | 0          | 0          | 0          | 0          | 136300000  | 0          |
| sp Q53HL  | CDCA8   | sp Q53HL  | 1 | 2  | 2  | 2  | 9.6 | 31.323 | 62654000   | 79071000   | 74838000   | 92178000   | 88249000   | 909300000  |
| sp Q53QV  | LBH     | sp Q53QV  | 1 | 1  | 1  | 1  | 16  | 12.217 | 0          | 0          | 0          | 0          | 0          | 17812000   |
| sp Q53S0  | RAB6D   | sp Q53S0  | 2 | 2  | 1  | 1  | 12  | 28.242 | 0          | 0          | 0          | 0          | 31640000   | 0          |
| sp Q53T5  | HS1BP3  | sp Q53T5  | 1 | 1  | 1  | 1  | 4.3 | 42.78  | 0          | 0          | 0          | 0          | 0          | 10673000   |
| sp Q562R  | ACTBL2  | sp Q562R  | 1 | 6  | 1  | 1  | 18  | 42.003 | 0          | 0          | 0          | 0          | 0          | 187390000  |
| sp Q567V  | MPV17L2 | sp Q567V  | 1 | 1  | 1  | 1  | 7.8 | 23.18  | 0          | 0          | 0          | 0          | 0          | 61045000   |
| sp Q56VL  | OCIAD2  | sp Q56VL  | 1 | 4  | 4  | 4  | 23  | 16.953 | 320520000  | 428140000  | 322530000  | 293570000  | 342870000  | 399300000  |
| sp Q58FF  | HSP90AB | sp Q58FF  | 1 | 6  | 1  | 1  | 11  | 58.264 | 0          | 0          | 0          | 0          | 440770000  | 0          |
| sp Q58FF  | HSP90AB | sp Q58FF  | 1 | 14 | 1  | 1  | 27  | 44.348 | 1533900000 | 2268900000 | 1943400000 | 1709600000 | 1124800000 | 1667200000 |
| sp Q5BJD  | TMEM41E | sp Q5BJD  | 1 | 1  | 1  | 1  | 6.5 | 32.513 | 0          | 251590000  | 198250000  | 216790000  | 294040000  | 155000000  |
| sp Q5BJF  | TMEM97  | sp Q5BJF  | 1 | 2  | 2  | 2  | 13  | 20.848 | 166640000  | 0          | 0          | 166620000  | 142150000  | 0          |
| sp Q5BJH  | YIF1B   | sp Q5BJH  | 1 | 2  | 2  | 2  | 17  | 34.435 | 0          | 0          | 0          | 0          | 51790000   | 0          |
| sp Q5BKZ  | ZNF326  | sp Q5BKZ  | 1 | 11 | 11 | 11 | 25  | 65.653 | 1064100000 | 989730000  | 989840000  | 916080000  | 1085300000 | 1157200000 |
| sp Q5EBL  | PDZD11  | sp Q5EBL  | 1 | 1  | 1  | 1  | 19  | 16.131 | 0          | 0          | 0          | 30474000   | 0          | 0          |
| sp Q5F1R  | DNAJC21 | sp Q5F1R  | 1 | 7  | 7  | 7  | 17  | 62.027 | 269560000  | 342830000  | 328550000  | 322370000  | 290510000  | 249210000  |
| sp Q5GLZ  | HERC4   | sp Q5GLZ  | 1 | 4  | 4  | 4  | 6.1 | 118.56 | 116250000  | 114540000  | 150740000  | 144560000  | 116040000  | 113000000  |
| sp Q5H9R  | PPP6R3  | sp Q5H9R  | 1 | 15 | 15 | 15 | 22  | 97.668 | 1908200000 | 1962200000 | 2241700000 | 1778700000 | 1884800000 | 2191800000 |
| sp Q5HYI  | RABL3   | sp Q5HYI  | 1 | 1  | 1  | 1  | 8.9 | 26.422 | 0          | 54713000   | 0          | 0          | 66551000   | 0          |
| sp Q5JPE  | NOMO2   | sp Q5JPE  | 2 | 19 | 19 | 2  | 24  | 139.44 | 1436500000 | 1413700000 | 1365200000 | 1556700000 | 1433700000 | 1508100000 |
| sp Q5JRA  | MIA3    | sp Q5JRA  | 1 | 4  | 4  | 4  | 2.8 | 213.7  | 0          | 0          | 0          | 138050000  | 0          | 0          |
| sp Q5JRX  | PITRM1  | sp Q5JRX  | 1 | 14 | 14 | 14 | 19  | 117.41 | 876060000  | 975600000  | 945420000  | 1074600000 | 1342200000 | 1099300000 |
| sp Q5JS5  | PSMG4   | sp Q5JS5  | 1 | 1  | 1  | 1  | 20  | 13.775 | 124650000  | 0          | 0          | 0          | 144710000  | 106650000  |
| sp Q5JSH  | WDR44   | sp Q5JSH  | 1 | 5  | 5  | 5  | 8.7 | 101.37 | 92411000   | 252420000  | 315890000  | 191810000  | 256640000  | 207120000  |
| sp Q5JSL  | DOCK11  | sp Q5JSL  | 1 | 1  | 1  | 1  | 0.7 | 237.67 | 0          | 0          | 0          | 0          | 0          | 53570000   |

|                   |           |   |    |    |    |     |        |            |            |            |            |            |            |
|-------------------|-----------|---|----|----|----|-----|--------|------------|------------|------------|------------|------------|------------|
| sp Q5JSZ PRRC2B   | sp Q5JSZ  | 1 | 2  | 1  | 1  | 1.2 | 242.96 | 0          | 0          | 0          | 0          | 0          | 15103000   |
| sp Q5JTH RRP12    | sp Q5JTH  | 1 | 18 | 18 | 18 | 17  | 143.7  | 917650000  | 751810000  | 725660000  | 892120000  | 920370000  | 797100000  |
| sp Q5JTJ COA6     | sp Q5JTJ  | 1 | 4  | 4  | 4  | 34  | 14.116 | 629840000  | 609050000  | 767240000  | 450030000  | 604050000  | 0          |
| sp Q5JTV TOR1AIP  | sp Q5JTV  | 1 | 11 | 11 | 10 | 24  | 66.248 | 1323500000 | 1093500000 | 1327100000 | 1206200000 | 1377200000 | 1867200000 |
| sp Q5JTZ AARS2    | sp Q5JTZ  | 1 | 2  | 2  | 2  | 3.8 | 107.34 | 102190000  | 37813000   | 0          | 0          | 0          | 129600000  |
| sp Q5JUR TEX30    | sp Q5JUR  | 1 | 1  | 1  | 1  | 4.8 | 25.585 | 0          | 0          | 0          | 0          | 62148000   | 0          |
| sp Q5JVF PCID2    | sp Q5JVF  | 1 | 5  | 5  | 5  | 16  | 46.029 | 342340000  | 361750000  | 376260000  | 373830000  | 256250000  | 428250000  |
| sp Q5K65 SAMD9    | sp Q5K65  | 1 | 10 | 10 | 10 | 9.8 | 184.28 | 439410000  | 374340000  | 394780000  | 339530000  | 517830000  | 325380000  |
| sp Q5M77 SPECC1   | sp Q5M77  | 1 | 8  | 8  | 8  | 11  | 118.58 | 221190000  | 371130000  | 177890000  | 265240000  | 241390000  | 216700000  |
| sp Q5MIZ PPP4R3B  | sp Q5MIZ  | 1 | 5  | 2  | 2  | 6.7 | 97.457 | 293760000  | 290880000  | 417390000  | 286830000  | 233940000  | 267830000  |
| sp Q5QJE DNTTIP2  | sp Q5QJE  | 1 | 9  | 9  | 9  | 16  | 84.468 | 428400000  | 477930000  | 303060000  | 428660000  | 480230000  | 408270000  |
| sp Q5R3I4 TTC38   | sp Q5R3I4 | 1 | 1  | 1  | 1  | 4.3 | 52.787 | 0          | 0          | 0          | 0          | 0          | 32002000   |
| sp Q5RI15 COX20   | sp Q5RI15 | 1 | 3  | 3  | 3  | 32  | 13.291 | 270580000  | 333190000  | 293390000  | 367540000  | 292110000  | 421330000  |
| sp Q5RKV EXOSC6   | sp Q5RKV  | 1 | 6  | 6  | 6  | 27  | 28.235 | 535050000  | 426310000  | 384770000  | 400160000  | 451730000  | 465310000  |
| sp Q5SNT TMEM201  | sp Q5SNT  | 1 | 3  | 3  | 3  | 5.1 | 72.235 | 0          | 0          | 0          | 114790000  | 0          | 0          |
| sp Q5SRE NUP188   | sp Q5SRE  | 1 | 14 | 14 | 14 | 11  | 196.04 | 337150000  | 398250000  | 355730000  | 315700000  | 275040000  | 244310000  |
| sp Q5SSJ HP1BP3   | sp Q5SSJ  | 1 | 12 | 12 | 12 | 23  | 61.206 | 1134300000 | 1259600000 | 1234500000 | 1237200000 | 1379000000 | 1343400000 |
| sp Q5SW7 CEP170   | sp Q5SW7  | 2 | 6  | 6  | 6  | 5.7 | 175.29 | 195700000  | 252570000  | 195190000  | 229620000  | 301590000  | 0          |
| sp Q5SWX ODR4     | sp Q5SWX  | 1 | 3  | 3  | 3  | 11  | 51.103 | 116380000  | 0          | 0          | 0          | 127520000  | 0          |
| sp Q5SY1 NOL9     | sp Q5SY1  | 1 | 6  | 6  | 6  | 13  | 79.322 | 381480000  | 367270000  | 382840000  | 269320000  | 256660000  | 297570000  |
| sp Q5T0F CC2D1B   | sp Q5T0F  | 1 | 3  | 3  | 3  | 7.1 | 94.223 | 0          | 0          | 0          | 77223000   | 0          | 0          |
| sp Q5T0N FNBP1L   | sp Q5T0N  | 1 | 2  | 2  | 2  | 5.8 | 70.065 | 0          | 0          | 0          | 0          | 0          | 25814000   |
| sp Q5T1C THEM4    | sp Q5T1C  | 1 | 1  | 1  | 1  | 5   | 27.129 | 0          | 0          | 0          | 0          | 15164000   | 0          |
| sp Q5T1M FKBP15   | sp Q5T1M  | 1 | 6  | 6  | 6  | 7.8 | 133.63 | 143470000  | 106660000  | 93316000   | 170740000  | 125620000  | 137970000  |
| sp Q5T20 ZC3H13   | sp Q5T20  | 1 | 3  | 3  | 3  | 2.5 | 196.63 | 333420000  | 166380000  | 385680000  | 289050000  | 376470000  | 358840000  |
| sp Q5T28 SPOUT1   | sp Q5T28  | 1 | 4  | 4  | 4  | 17  | 42.008 | 0          | 303310000  | 0          | 245220000  | 0          | 0          |
| sp Q5T3I0 GPATCH4 | sp Q5T3I0 | 1 | 4  | 4  | 4  | 16  | 50.381 | 82850000   | 67807000   | 0          | 0          | 84955000   | 81880000   |
| sp Q5T4S UBR4     | sp Q5T4S  | 1 | 49 | 49 | 49 | 14  | 573.83 | 1980200000 | 1916000000 | 1821500000 | 1803100000 | 1851900000 | 1988700000 |
| sp Q5T5C STXBP5   | sp Q5T5C  | 1 | 2  | 2  | 2  | 2.3 | 127.57 | 0          | 0          | 0          | 0          | 0          | 46456000   |
| sp Q5T5P KIAA1217 | sp Q5T5P  | 1 | 3  | 3  | 3  | 1.7 | 214.11 | 0          | 54125000   | 47162000   | 0          | 0          | 0          |
| sp Q5T65 MRPL2    | sp Q5T65  | 1 | 3  | 3  | 3  | 18  | 33.3   | 334430000  | 319780000  | 0          | 331830000  | 342450000  | 0          |
| sp Q5T6F UBAP2    | sp Q5T6F  | 1 | 12 | 12 | 12 | 22  | 117.11 | 1038400000 | 926080000  | 943030000  | 886840000  | 1054300000 | 986870000  |
| sp Q5T6V C9orf64  | sp Q5T6V  | 1 | 5  | 5  | 5  | 12  | 39.028 | 175770000  | 224260000  | 150840000  | 197330000  | 153350000  | 107050000  |
| sp Q5T8D ACBD5    | sp Q5T8D  | 2 | 2  | 2  | 2  | 3.6 | 60.091 | 386030000  | 380200000  | 255480000  | 408440000  | 0          | 0          |
| sp Q5T8P RBM26    | sp Q5T8P  | 1 | 12 | 12 | 11 | 14  | 113.6  | 481730000  | 531220000  | 374760000  | 672690000  | 462290000  | 588300000  |
| sp Q5T9A ATAD3B   | sp Q5T9A  | 1 | 20 | 7  | 6  | 36  | 72.572 | 742950000  | 769250000  | 472800000  | 551900000  | 812610000  | 723580000  |
| sp Q5T9L WLS      | sp Q5T9L  | 1 | 2  | 2  | 2  | 5.9 | 62.253 | 128450000  | 0          | 0          | 0          | 104590000  | 0          |
| sp Q5TA5 CTPT     | sp Q5TA5  | 1 | 1  | 1  | 1  | 10  | 24.365 | 0          | 0          | 0          | 0          | 32844000   | 0          |
| sp Q5TAG DCAF8    | sp Q5TAG  | 1 | 1  | 1  | 1  | 1.8 | 66.851 | 0          | 0          | 0          | 0          | 36496000   | 0          |

|                   |          |   |    |    |    |     |        |            |            |            |            |            |            |
|-------------------|----------|---|----|----|----|-----|--------|------------|------------|------------|------------|------------|------------|
| sp Q5TC1 ATPAF1   | sp Q5TC1 | 1 | 2  | 2  | 2  | 9.5 | 36.436 | 0          | 0          | 0          | 95371000   | 0          | 0          |
| sp Q5TDH DDI2     | sp Q5TDH | 1 | 5  | 5  | 5  | 21  | 44.522 | 431340000  | 253060000  | 393570000  | 363850000  | 328440000  | 287930000  |
| sp Q5TFE NT5DC1   | sp Q5TFE | 1 | 9  | 9  | 9  | 30  | 51.844 | 409500000  | 640520000  | 501780000  | 607120000  | 539370000  | 493440000  |
| sp Q5TGZ MINOS1   | sp Q5TGZ | 1 | 2  | 2  | 2  | 19  | 8.8081 | 0          | 0          | 0          | 743220000  | 0          | 0          |
| sp Q5THJ VPS13D   | sp Q5THJ | 1 | 1  | 1  | 1  | 0.4 | 491.91 | 0          | 0          | 0          | 0          | 1876500000 | 0          |
| sp Q5THK PRR14L   | sp Q5THK | 1 | 1  | 1  | 1  | 0.8 | 237.3  | 0          | 0          | 0          | 0          | 0          | 281830000  |
| sp Q5TZA CROCC    | sp Q5TZA | 1 | 1  | 1  | 1  | 0.4 | 228.52 | 0          | 0          | 0          | 0          | 0          | 874450000  |
| sp Q5U3C TMEM164  | sp Q5U3C | 1 | 1  | 1  | 1  | 6.1 | 33.507 | 0          | 0          | 0          | 0          | 0          | 0          |
| sp Q5U5X LYRM7    | sp Q5U5X | 1 | 3  | 3  | 3  | 40  | 11.955 | 249650000  | 244070000  | 276530000  | 249050000  | 0          | 0          |
| sp Q5U64 C12orf60 | sp Q5U64 | 1 | 1  | 1  | 1  | 3.3 | 27.626 | 0          | 0          | 0          | 0          | 0          | 107730000  |
| sp Q5UC0 EMC10    | sp Q5UC0 | 1 | 1  | 1  | 1  | 6.5 | 27.347 | 0          | 0          | 0          | 0          | 86965000   | 0          |
| sp Q5UIP RIF1     | sp Q5UIP | 1 | 9  | 9  | 9  | 5.5 | 274.46 | 198350000  | 315410000  | 288230000  | 240590000  | 279300000  | 284690000  |
| sp Q5VSL STRIP1   | sp Q5VSL | 1 | 4  | 4  | 4  | 8.4 | 95.575 | 75392000   | 0          | 0          | 0          | 87095000   | 60190000   |
| sp Q5VT2 CDC42BP  | sp Q5VT2 | 1 | 3  | 3  | 2  | 1.6 | 197.3  | 0          | 271750000  | 0          | 0          | 354980000  | 0          |
| sp Q5VT5 RPRD2    | sp Q5VT5 | 1 | 13 | 13 | 13 | 16  | 156.02 | 269890000  | 318210000  | 297230000  | 295510000  | 274120000  | 261150000  |
| sp Q5VT6 MARC1    | sp Q5VT6 | 2 | 3  | 3  | 3  | 17  | 37.499 | 105290000  | 101940000  | 83823000   | 141080000  | 79215000   | 109450000  |
| sp Q5VT7 ANXA8L1  | sp Q5VT7 | 2 | 9  | 9  | 9  | 39  | 36.879 | 771970000  | 938520000  | 517990000  | 751250000  | 798250000  | 667240000  |
| sp Q5VTL PRPF38B  | sp Q5VTL | 1 | 2  | 2  | 2  | 3.8 | 64.467 | 0          | 0          | 0          | 0          | 0          | 87961000   |
| sp Q5VTR RNF20    | sp Q5VTR | 1 | 8  | 8  | 6  | 10  | 113.66 | 362550000  | 345720000  | 381280000  | 363450000  | 418290000  | 436230000  |
| sp Q5VV4 CDKAL1   | sp Q5VV4 | 1 | 1  | 1  | 1  | 2.1 | 65.111 | 0          | 0          | 0          | 0          | 0          | 24205000   |
| sp Q5VW3 BROX     | sp Q5VW3 | 1 | 6  | 6  | 6  | 25  | 46.476 | 570270000  | 497210000  | 426180000  | 447730000  | 554980000  | 549050000  |
| sp Q5VW3 FOCAD    | sp Q5VW3 | 1 | 4  | 4  | 4  | 3.6 | 200.07 | 398800000  | 343270000  | 0          | 273650000  | 249070000  | 310760000  |
| sp Q5VYK ECPAS    | sp Q5VYK | 1 | 27 | 27 | 27 | 22  | 204.29 | 1682700000 | 1473800000 | 1619100000 | 1408400000 | 1476900000 | 1541100000 |
| sp Q5VZF MBNL2    | sp Q5VZF | 1 | 3  | 1  | 1  | 7.5 | 40.517 | 0          | 0          | 0          | 0          | 0          | 16310000   |
| sp Q5VZK CARMIL1  | sp Q5VZK | 1 | 3  | 3  | 3  | 3   | 151.56 | 293740000  | 211820000  | 304970000  | 0          | 185270000  | 255110000  |
| sp Q5VZL ZMYM4    | sp Q5VZL | 1 | 2  | 2  | 2  | 1.9 | 172.79 | 0          | 0          | 0          | 0          | 0          | 81062000   |
| sp Q5XKF MIC13    | sp Q5XKF | 1 | 2  | 2  | 2  | 33  | 13.087 | 114490000  | 56559000   | 0          | 0          | 0          | 61970000   |
| sp Q5ZPR CD276    | sp Q5ZPR | 1 | 3  | 3  | 3  | 12  | 57.235 | 401960000  | 388880000  | 258720000  | 502040000  | 388930000  | 418550000  |
| sp Q63HN RNF213   | sp Q63HN | 1 | 11 | 11 | 11 | 2.9 | 591.4  | 187830000  | 217660000  | 178370000  | 173690000  | 150670000  | 153500000  |
| sp Q63ZY KANK2    | sp Q63ZY | 1 | 8  | 8  | 8  | 14  | 91.173 | 166740000  | 187190000  | 187070000  | 207360000  | 210570000  | 242630000  |
| sp Q641Q WASHC2   | sp Q641Q | 2 | 10 | 10 | 1  | 14  | 147.18 | 249070000  | 295300000  | 328950000  | 224300000  | 256620000  | 238560000  |
| sp Q658Y FAM91A1  | sp Q658Y | 1 | 4  | 4  | 4  | 7.3 | 93.908 | 62449000   | 53287000   | 57212000   | 0          | 0          | 59403000   |
| sp Q66K1 TBC1D9B  | sp Q66K1 | 1 | 3  | 3  | 3  | 3.7 | 140.52 | 0          | 0          | 0          | 0          | 0          | 188280000  |
| sp Q66K7 MAP1S    | sp Q66K7 | 1 | 2  | 2  | 2  | 3   | 112.21 | 59764000   | 36354000   | 45651000   | 61336000   | 45279000   | 34645000   |
| sp Q66PJ ARL6IP4  | sp Q66PJ | 1 | 1  | 1  | 1  | 3.8 | 44.915 | 0          | 0          | 0          | 0          | 0          | 71006000   |
| sp Q68CF ARID2    | sp Q68CF | 1 | 3  | 3  | 3  | 2.1 | 197.39 | 0          | 0          | 0          | 0          | 0          | 114730000  |
| sp Q68CZ TNS3     | sp Q68CZ | 2 | 10 | 10 | 9  | 12  | 155.26 | 294500000  | 448070000  | 353740000  | 475190000  | 269690000  | 312480000  |
| sp Q68DH LMBRD2   | sp Q68DH | 1 | 1  | 1  | 1  | 3   | 81.171 | 0          | 0          | 0          | 0          | 0          | 19736000   |
| sp Q68E0 INTS3    | sp Q68E0 | 1 | 4  | 4  | 4  | 7.3 | 118.07 | 230870000  | 250940000  | 141560000  | 177990000  | 170980000  | 244060000  |

|                   |           |   |    |    |    |     |        |            |            |            |            |            |            |
|-------------------|-----------|---|----|----|----|-----|--------|------------|------------|------------|------------|------------|------------|
| sp Q68EM ARHGAP   | sp Q68EM  | 1 | 16 | 16 | 16 | 36  | 95.436 | 1386000000 | 986370000  | 1103100000 | 1222500000 | 1435000000 | 1093500000 |
| sp Q69YL NCBP2-A  | sp Q69YL  | 1 | 1  | 1  | 1  | 14  | 10.89  | 0          | 0          | 0          | 0          | 30496000   | 0          |
| sp Q69YN CWF19L1  | sp Q69YN  | 1 | 5  | 5  | 5  | 14  | 60.618 | 98930000   | 80037000   | 122710000  | 161560000  | 87364000   | 0          |
| sp Q69YN VIRMA    | sp Q69YN  | 1 | 3  | 3  | 3  | 2.6 | 202.02 | 0          | 0          | 42965000   | 36344000   | 39501000   | 0          |
| sp Q6DD8 ZNF787   | sp Q6DD8  | 1 | 2  | 2  | 2  | 8.1 | 40.428 | 0          | 0          | 0          | 0          | 0          | 16918000   |
| sp Q6DD8 ATL3     | sp Q6DD8  | 1 | 14 | 14 | 14 | 44  | 60.541 | 2237200000 | 2539700000 | 1868100000 | 2565200000 | 2210600000 | 2425400000 |
| sp Q6DKI RPL7L1   | sp Q6DKI  | 1 | 2  | 2  | 2  | 11  | 28.661 | 279130000  | 240000000  | 0          | 0          | 0          | 0          |
| sp Q6DKJ NXN      | sp Q6DKJ  | 1 | 5  | 5  | 5  | 15  | 48.392 | 108060000  | 126400000  | 98958000   | 134780000  | 147440000  | 135980000  |
| sp Q6EEV POLR2M   | sp Q6EEV  | 1 | 2  | 2  | 2  | 25  | 15.131 | 96313000   | 145010000  | 104240000  | 91462000   | 130710000  | 0          |
| sp Q6EMH VASN     | sp Q6EMH  | 1 | 2  | 2  | 2  | 6.5 | 71.712 | 0          | 84031000   | 0          | 0          | 0          | 0          |
| sp Q6FI8 CIAPIN1  | sp Q6FI8  | 1 | 6  | 6  | 6  | 26  | 33.582 | 317090000  | 272480000  | 273710000  | 201580000  | 310980000  | 331960000  |
| sp Q6GMV PTRHD1   | sp Q6GMV  | 1 | 4  | 4  | 4  | 42  | 15.805 | 285980000  | 267900000  | 299390000  | 258060000  | 275840000  | 226640000  |
| sp Q6I9Y2 THOC7   | sp Q6I9Y2 | 1 | 3  | 3  | 3  | 18  | 23.743 | 0          | 0          | 0          | 65495000   | 0          | 0          |
| sp Q6IA86 ELP2    | sp Q6IA86 | 1 | 8  | 8  | 8  | 10  | 92.499 | 537000000  | 577910000  | 480330000  | 628260000  | 538330000  | 544790000  |
| sp Q6IAA8 LAMTOR  | sp Q6IAA8 | 1 | 6  | 6  | 6  | 57  | 17.745 | 388560000  | 320900000  | 421020000  | 385020000  | 486810000  | 401790000  |
| sp Q6IAN0 DHRS7B  | sp Q6IAN0 | 1 | 4  | 4  | 4  | 16  | 35.119 | 94114000   | 0          | 0          | 89326000   | 110590000  | 128030000  |
| sp Q6IBS0 TWF2    | sp Q6IBS0 | 1 | 14 | 14 | 11 | 50  | 39.548 | 2229400000 | 2201900000 | 2251200000 | 1505000000 | 2091100000 | 1585600000 |
| sp Q6IBW NCAPH2   | sp Q6IBW  | 1 | 2  | 2  | 2  | 8.1 | 68.226 | 0          | 0          | 0          | 0          | 0          | 46677000   |
| sp Q6IN85 PPP4R3A | sp Q6IN85 | 1 | 6  | 6  | 3  | 8.8 | 95.367 | 0          | 213960000  | 186230000  | 164220000  | 0          | 150540000  |
| sp Q6IQ49 SDE2    | sp Q6IQ49 | 1 | 1  | 1  | 1  | 3.1 | 49.741 | 0          | 0          | 0          | 0          | 0          | 71693000   |
| sp Q6KC7 NIPBL    | sp Q6KC7  | 1 | 10 | 10 | 10 | 5.2 | 316.05 | 284520000  | 325050000  | 0          | 473200000  | 214460000  | 275460000  |
| sp Q6L8Q PDE12    | sp Q6L8Q  | 1 | 7  | 7  | 7  | 22  | 67.351 | 557820000  | 496690000  | 446620000  | 466190000  | 555990000  | 464260000  |
| sp Q6NUK SLC25A2  | sp Q6NUK  | 1 | 15 | 15 | 15 | 38  | 53.354 | 1183100000 | 1165300000 | 1034800000 | 1151900000 | 1067100000 | 1294400000 |
| sp Q6NUN RETSAT   | sp Q6NUN  | 1 | 3  | 3  | 3  | 6.7 | 66.819 | 0          | 0          | 63311000   | 0          | 0          | 0          |
| sp Q6NU0 TMEM214  | sp Q6NU0  | 1 | 3  | 3  | 3  | 5.5 | 77.15  | 0          | 0          | 0          | 0          | 0          | 124950000  |
| sp Q6NVY HIBCH    | sp Q6NVY  | 1 | 6  | 6  | 6  | 17  | 43.482 | 433630000  | 291010000  | 348930000  | 525110000  | 482070000  | 234330000  |
| sp Q6NXE ARMC6    | sp Q6NXE  | 1 | 5  | 5  | 5  | 11  | 54.141 | 260740000  | 240080000  | 229110000  | 273880000  | 193890000  | 212830000  |
| sp Q6NXF TTI2     | sp Q6NXF  | 1 | 2  | 2  | 2  | 5.9 | 56.914 | 0          | 0          | 0          | 0          | 0          | 24268000   |
| sp Q6NY0 JMJD6    | sp Q6NY0  | 1 | 6  | 6  | 6  | 23  | 46.461 | 235420000  | 239940000  | 239870000  | 226470000  | 219020000  | 217370000  |
| sp Q6NY0 PPP1R18  | sp Q6NY0  | 1 | 8  | 8  | 8  | 25  | 67.942 | 328700000  | 311900000  | 492150000  | 548590000  | 416320000  | 531750000  |
| sp Q6P58 MZT2A    | sp Q6P58  | 2 | 1  | 1  | 1  | 14  | 16.22  | 0          | 0          | 0          | 0          | 0          | 46431000   |
| sp Q6NZI2 CAVIN1  | sp Q6NZI2 | 1 | 10 | 10 | 10 | 37  | 43.476 | 2615600000 | 2927300000 | 2979000000 | 3562000000 | 3161100000 | 2905100000 |
| sp Q6P0Q MAST2    | sp Q6P0Q  | 1 | 2  | 1  | 1  | 1.7 | 196.43 | 0          | 0          | 0          | 0          | 0          | 90567000   |
| sp Q6P15 DHX57    | sp Q6P15  | 1 | 3  | 3  | 3  | 3.5 | 155.6  | 0          | 314050000  | 0          | 0          | 0          | 0          |
| sp Q6P16 MRPL54   | sp Q6P16  | 1 | 2  | 2  | 2  | 41  | 15.819 | 0          | 103780000  | 74647000   | 121020000  | 0          | 0          |
| sp Q6P1A LPCAT3   | sp Q6P1A  | 1 | 4  | 4  | 4  | 12  | 56.034 | 0          | 0          | 149580000  | 0          | 0          | 188230000  |
| sp Q6P1J CDC73    | sp Q6P1J  | 1 | 14 | 14 | 14 | 28  | 60.576 | 706380000  | 691250000  | 696710000  | 691660000  | 837050000  | 596410000  |
| sp Q6P1K PMF1     | sp Q6P1K  | 1 | 1  | 1  | 1  | 5.9 | 23.339 | 0          | 0          | 0          | 0          | 0          | 22896000   |
| sp Q6P1L MRPL14   | sp Q6P1L  | 1 | 3  | 3  | 3  | 23  | 15.947 | 128280000  | 154710000  | 128970000  | 162100000  | 187670000  | 168060000  |

|                   |           |   |    |    |    |     |        |            |            |            |            |            |            |
|-------------------|-----------|---|----|----|----|-----|--------|------------|------------|------------|------------|------------|------------|
| sp Q6P1M SLC27A4  | sp Q6P1M  | 1 | 6  | 6  | 6  | 14  | 72.063 | 184870000  | 146020000  | 203800000  | 195900000  | 196210000  | 151930000  |
| sp Q6P1N CC2D1A   | sp Q6P1N  | 1 | 6  | 6  | 6  | 9.4 | 104.06 | 0          | 79452000   | 140300000  | 93227000   | 142000000  | 154480000  |
| sp Q96IZ6 METTL2A | sp Q96IZ6 | 2 | 1  | 1  | 1  | 5.8 | 43.537 | 0          | 0          | 0          | 0          | 0          | 48886000   |
| sp Q6P1X TAF2     | sp Q6P1X  | 1 | 2  | 2  | 2  | 2   | 136.97 | 367850000  | 0          | 0          | 0          | 0          | 1044300000 |
| sp Q6P1X C8orf82  | sp Q6P1X  | 1 | 1  | 1  | 1  | 8.3 | 23.889 | 0          | 0          | 0          | 0          | 0          | 71965000   |
| sp Q6P2E EDC4     | sp Q6P2E  | 1 | 18 | 18 | 18 | 24  | 151.66 | 881700000  | 965630000  | 1000600000 | 900430000  | 1131100000 | 976230000  |
| sp Q96GK FAHD2A   | sp Q96GK  | 2 | 3  | 3  | 3  | 17  | 34.596 | 0          | 0          | 0          | 0          | 85629000   | 0          |
| sp Q6P2C PRPF8    | sp Q6P2C  | 1 | 63 | 63 | 63 | 35  | 273.6  | 8919700000 | 8805900000 | 9018600000 | 8500500000 | 8006700000 | 8391000000 |
| sp Q6P3V SCYL2    | sp Q6P3V  | 1 | 2  | 2  | 2  | 3.9 | 103.71 | 0          | 0          | 79993000   | 0          | 122630000  | 0          |
| sp Q6P3X TTC27    | sp Q6P3X  | 1 | 4  | 4  | 4  | 5.9 | 96.631 | 44877000   | 90812000   | 158620000  | 0          | 0          | 0          |
| sp Q6P58 FAHD1    | sp Q6P58  | 1 | 6  | 6  | 6  | 31  | 24.843 | 342880000  | 172000000  | 277980000  | 350200000  | 310500000  | 0          |
| sp Q6P6C ALKBH5   | sp Q6P6C  | 1 | 1  | 1  | 1  | 7.4 | 44.255 | 0          | 0          | 0          | 0          | 0          | 51360000   |
| sp Q6P99 PDXDC1   | sp Q6P99  | 2 | 14 | 14 | 14 | 22  | 86.706 | 521900000  | 607860000  | 655020000  | 611230000  | 770760000  | 515960000  |
| sp Q6PCE PGM2L1   | sp Q6PCE  | 1 | 3  | 3  | 3  | 8.4 | 70.441 | 65194000   | 65507000   | 0          | 85566000   | 63884000   | 58589000   |
| sp Q6PD6 CTR9     | sp Q6PD6  | 1 | 10 | 10 | 10 | 11  | 133.5  | 496760000  | 445790000  | 551120000  | 524200000  | 443540000  | 443830000  |
| sp Q6PGF TTC37    | sp Q6PGF  | 1 | 15 | 15 | 15 | 15  | 175.48 | 491800000  | 631910000  | 494870000  | 458240000  | 477990000  | 496730000  |
| sp Q6PI48 DARS2   | sp Q6PI48 | 1 | 11 | 11 | 11 | 23  | 73.562 | 457450000  | 322630000  | 412580000  | 404580000  | 388610000  | 380680000  |
| sp Q6PI78 TMEM65  | sp Q6PI78 | 1 | 2  | 2  | 2  | 9.2 | 25.498 | 0          | 0          | 0          | 0          | 0          | 77694000   |
| sp Q6PID6 TTC33   | sp Q6PID6 | 1 | 2  | 2  | 2  | 18  | 29.411 | 0          | 88754000   | 125420000  | 0          | 0          | 0          |
| sp Q6PIU2 NCEH1   | sp Q6PIU2 | 1 | 9  | 9  | 9  | 30  | 45.807 | 368650000  | 463550000  | 386370000  | 475160000  | 652080000  | 545330000  |
| sp Q6PJG ELMSAN1  | sp Q6PJG  | 1 | 2  | 2  | 2  | 3.5 | 114.99 | 0          | 0          | 0          | 0          | 0          | 13983000   |
| sp Q6PJG BRAT1    | sp Q6PJG  | 1 | 9  | 9  | 9  | 21  | 88.118 | 244050000  | 307580000  | 156240000  | 163350000  | 115920000  | 219540000  |
| sp Q6PJT ZC3H14   | sp Q6PJT  | 1 | 6  | 6  | 6  | 13  | 82.875 | 142780000  | 243480000  | 183890000  | 270870000  | 238150000  | 146180000  |
| sp Q6PKG LARP1    | sp Q6PKG  | 2 | 24 | 24 | 24 | 36  | 123.51 | 3265000000 | 3266100000 | 3075800000 | 2820400000 | 2925900000 | 3128800000 |
| sp Q6PL1 ATAD2    | sp Q6PL1  | 1 | 2  | 2  | 2  | 2   | 158.55 | 0          | 0          | 44609000   | 0          | 0          | 0          |
| sp Q6QNY BLOC1S3  | sp Q6QNY  | 1 | 1  | 1  | 1  | 9.4 | 21.255 | 0          | 0          | 0          | 0          | 0          | 0          |
| sp Q6QNY BLOC1S2  | sp Q6QNY  | 1 | 1  | 1  | 1  | 7.7 | 15.961 | 0          | 0          | 0          | 0          | 0          | 33219000   |
| sp Q6RFH WDR74    | sp Q6RFH  | 1 | 6  | 6  | 6  | 21  | 42.441 | 242240000  | 249170000  | 260500000  | 284530000  | 319380000  | 239170000  |
| sp Q6RW AGTRAP    | sp Q6RW   | 1 | 2  | 2  | 2  | 25  | 17.419 | 234860000  | 188830000  | 294590000  | 0          | 259630000  | 236360000  |
| sp Q6S8J POTEE    | sp Q6S8J  | 2 | 11 | 2  | 0  | 12  | 121.36 | 572230000  | 286080000  | 518030000  | 763040000  | 454180000  | 469850000  |
| sp Q6TFL CCDC171  | sp Q6TFL  | 1 | 1  | 1  | 1  | 1.4 | 152.81 | 0          | 0          | 0          | 0          | 0          | 129060000  |
| sp Q6UB3 MTHFD1L  | sp Q6UB3  | 1 | 20 | 19 | 19 | 25  | 105.79 | 1351300000 | 1181400000 | 1398800000 | 1557900000 | 1581400000 | 1225800000 |
| sp Q6UN1 FIP1L1   | sp Q6UN1  | 1 | 3  | 3  | 3  | 8.4 | 66.526 | 176570000  | 134030000  | 0          | 177950000  | 176720000  | 170190000  |
| sp Q6UW6 KDELC1   | sp Q6UW6  | 1 | 2  | 2  | 2  | 6.6 | 58.042 | 0          | 0          | 0          | 0          | 109000000  | 0          |
| sp Q6UW6 TMEM205  | sp Q6UW6  | 1 | 2  | 2  | 2  | 16  | 21.198 | 141430000  | 252080000  | 126280000  | 0          | 294500000  | 345850000  |
| sp Q6UW7 UQCC3    | sp Q6UW7  | 1 | 1  | 1  | 1  | 24  | 10.081 | 0          | 0          | 0          | 0          | 0          | 22967000   |
| sp Q6UW7 LRSAM1   | sp Q6UW7  | 1 | 4  | 4  | 4  | 7.7 | 83.593 | 118210000  | 170240000  | 160430000  | 118920000  | 0          | 168130000  |
| sp Q6UW7 SPINK6   | sp Q6UW7  | 1 | 1  | 1  | 1  | 20  | 8.5849 | 600770000  | 544960000  | 627970000  | 351020000  | 484430000  | 499840000  |
| sp Q6UW7 LCLAT1   | sp Q6UW7  | 1 | 2  | 2  | 2  | 8.2 | 48.92  | 0          | 0          | 0          | 0          | 0          | 125020000  |



|           |          |           |   |    |    |    |     |        |            |            |            |             |             |            |
|-----------|----------|-----------|---|----|----|----|-----|--------|------------|------------|------------|-------------|-------------|------------|
| sp Q6UX0  | CWC27    | sp Q6UX0  | 1 | 7  | 7  | 7  | 31  | 53.846 | 309170000  | 220120000  | 217650000  | 236310000   | 219750000   | 225090000  |
| sp Q6UX6  | DRAM2    | sp Q6UX6  | 1 | 1  | 1  | 1  | 8.3 | 29.766 | 0          | 0          | 0          | 0           | 0           | 41389000   |
| sp Q6UXH  | CRELD2   | sp Q6UXH  | 1 | 2  | 2  | 2  | 7.1 | 38.191 | 0          | 0          | 0          | 0           | 0           | 84008000   |
| sp Q6UXN  | WDR82    | sp Q6UXN  | 1 | 9  | 9  | 9  | 36  | 35.079 | 1007300000 | 840730000  | 1273500000 | 714140000   | 698530000   | 471250000  |
| sp Q6UXV  | APOOL    | sp Q6UXV  | 1 | 4  | 4  | 4  | 20  | 29.159 | 127500000  | 0          | 0          | 0           | 0           | 0          |
| sp Q6VN2  | RANBP10  | sp Q6VN2  | 1 | 1  | 1  | 1  | 2.3 | 67.256 | 0          | 0          | 0          | 0           | 0           | 119250000  |
| sp Q6WC0  | MPRIIP   | sp Q6WC0  | 1 | 17 | 17 | 17 | 26  | 116.53 | 669320000  | 670140000  | 680760000  | 702740000   | 600960000   | 602640000  |
| sp Q6WK2  | RAB11FIP | sp Q6WK2  | 1 | 2  | 2  | 1  | 1.6 | 137.17 | 357010000  | 370230000  | 341750000  | 0           | 0           | 324330000  |
| sp Q6XQN  | NAPRT    | sp Q6XQN  | 1 | 6  | 6  | 6  | 18  | 57.578 | 210380000  | 267720000  | 288830000  | 299320000   | 262770000   | 231030000  |
| sp Q6XZF  | DNMBP    | sp Q6XZF  | 1 | 2  | 2  | 2  | 1.4 | 177.35 | 0          | 0          | 0          | 54164000    | 0           | 0          |
| sp Q6Y1H  | HACD2    | sp Q6Y1H  | 1 | 1  | 1  | 1  | 3.9 | 28.368 | 0          | 0          | 0          | 0           | 0           | 46876000   |
| sp Q6Y7V  | GIGYF2   | sp Q6Y7V  | 1 | 9  | 9  | 9  | 12  | 150.07 | 398940000  | 342600000  | 389890000  | 336300000   | 383660000   | 348040000  |
| sp Q6YHK  | CD109    | sp Q6YHK  | 1 | 5  | 5  | 5  | 5.6 | 161.69 | 129930000  | 134810000  | 102440000  | 166130000   | 347880000   | 153150000  |
| sp Q6YN1  | HSDL2    | sp Q6YN1  | 1 | 15 | 15 | 15 | 42  | 45.394 | 1085000000 | 1051800000 | 1086000000 | 1052900000  | 1110000000  | 1119700000 |
| sp Q6YP2  | KYAT3    | sp Q6YP2  | 1 | 6  | 6  | 6  | 19  | 51.4   | 153010000  | 177810000  | 164040000  | 189800000   | 162880000   | 155460000  |
| sp Q6ZNE  | NFXL1    | sp Q6ZNE  | 1 | 1  | 1  | 1  | 2.6 | 101.34 | 0          | 0          | 0          | 67456000    | 0           | 0          |
| sp Q6ZRF  | QSOX2    | sp Q6ZRF  | 1 | 5  | 5  | 5  | 11  | 77.528 | 110050000  | 223480000  | 196420000  | 111160000   | 88479000    | 127580000  |
| sp Q6ZRS  | SRCAP    | sp Q6ZRS  | 1 | 6  | 6  | 6  | 2.1 | 343.55 | 0          | 1130400000 | 1279400000 | 0           | 1479800000  | 0          |
| sp Q6ZS1  | RIPOR1   | sp Q6ZS1  | 1 | 1  | 1  | 1  | 1.3 | 132.31 | 0          | 0          | 0          | 23861000    | 0           | 0          |
| sp Q6ZSJ  | C1orf122 | sp Q6ZSJ  | 1 | 1  | 1  | 1  | 11  | 11.471 | 0          | 0          | 0          | 0           | 0           | 200020000  |
| sp Q6ZUX  | LHFPL2   | sp Q6ZUX  | 1 | 1  | 1  | 1  | 6.6 | 24.486 | 0          | 0          | 0          | 0           | 102160000   | 0          |
| sp Q6ZVM  | TOM1L2   | sp Q6ZVM  | 1 | 4  | 4  | 4  | 14  | 55.556 | 59768000   | 89553000   | 68345000   | 112480000   | 82810000    | 56311000   |
| sp Q6ZW3  | SYDE1    | sp Q6ZW3  | 1 | 1  | 1  | 1  | 2.2 | 79.792 | 0          | 45213000   | 0          | 0           | 0           | 0          |
| sp Q6ZXV  | TMTC3    | sp Q6ZXV  | 1 | 4  | 4  | 4  | 5.8 | 104.01 | 0          | 0          | 497880000  | 0           | 0           | 617620000  |
| sp Q6ZYL  | GTF2H5   | sp Q6ZYL  | 1 | 1  | 1  | 1  | 21  | 8.0533 | 0          | 0          | 0          | 0           | 0           | 20840000   |
| sp Q70CC  | USP34    | sp Q70CC  | 1 | 3  | 3  | 3  | 1.6 | 404.23 | 0          | 104210000  | 0          | 0           | 0           | 0          |
| sp Q70E7  | RAPH1    | sp Q70E7  | 1 | 3  | 3  | 3  | 3.5 | 135.25 | 0          | 0          | 0          | 0           | 193600000   | 0          |
| sp Q70J9  | UNC13D   | sp Q70J9  | 1 | 9  | 9  | 9  | 13  | 123.28 | 504680000  | 348290000  | 419740000  | 334910000   | 393970000   | 342330000  |
| sp Q70UC  | IKBIP    | sp Q70UC  | 1 | 8  | 8  | 8  | 26  | 39.309 | 813760000  | 743670000  | 747970000  | 886720000   | 1029100000  | 878920000  |
| sp Q712K  | UBE2R2   | sp Q712K  | 1 | 3  | 3  | 2  | 12  | 27.166 | 0          | 0          | 0          | 0           | 0           | 16656000   |
| sp Q71DI3 | HIST2H3A | sp Q71DI3 | 1 | 5  | 1  | 1  | 46  | 15.388 | 17472000   | 26395000   | 62619000   | 105090000   | 0           | 12061000   |
| sp Q71RC  | LARP4    | sp Q71RC  | 1 | 6  | 6  | 6  | 13  | 80.595 | 333950000  | 442530000  | 348700000  | 334550000   | 280290000   | 335880000  |
| sp Q71UM  | RPS27L   | sp Q71UM  | 1 | 5  | 2  | 2  | 41  | 9.4771 | 577230000  | 548670000  | 719380000  | 564690000   | 813020000   | 976190000  |
| sp Q76FK  | NOL8     | sp Q76FK  | 1 | 2  | 2  | 2  | 3.3 | 131.61 | 0          | 80716000   | 0          | 0           | 42399000    | 0          |
| sp Q7KZ8  | SUPT6H   | sp Q7KZ8  | 1 | 16 | 16 | 16 | 14  | 199.07 | 694260000  | 631590000  | 739080000  | 648330000   | 633930000   | 625930000  |
| sp Q7KZF  | SND1     | sp Q7KZF  | 1 | 40 | 40 | 40 | 55  | 102    | 1.1107E+10 | 1.1435E+10 | 1.0058E+10 | 10868000000 | 11939000000 | 1.1942E+10 |
| sp Q7KZI7 | MARK2    | sp Q7KZI7 | 4 | 4  | 4  | 4  | 8.4 | 87.91  | 0          | 0          | 0          | 125290000   | 130690000   | 119490000  |
| sp Q7KZN  | COX15    | sp Q7KZN  | 1 | 4  | 4  | 4  | 13  | 46.03  | 251080000  | 180890000  | 226250000  | 321340000   | 198080000   | 241670000  |
| sp Q7L014 | DDX46    | sp Q7L014 | 1 | 26 | 26 | 26 | 31  | 117.36 | 2146900000 | 2280800000 | 2010600000 | 1966800000  | 2169300000  | 2007000000 |

|                   |           |   |    |    |    |     |        |            |            |            |            |            |            |
|-------------------|-----------|---|----|----|----|-----|--------|------------|------------|------------|------------|------------|------------|
| sp Q7L0Y TRMT10C  | sp Q7L0Y  | 1 | 16 | 16 | 16 | 51  | 47.346 | 740090000  | 737900000  | 708520000  | 825830000  | 656250000  | 758790000  |
| sp Q7L1Q BZW1     | sp Q7L1Q  | 1 | 16 | 15 | 15 | 38  | 48.043 | 5506000000 | 5651300000 | 5195600000 | 5554200000 | 5387500000 | 5946100000 |
| sp Q7L2E DHX30    | sp Q7L2E  | 1 | 27 | 27 | 27 | 28  | 133.94 | 1697800000 | 1523700000 | 1563400000 | 1416800000 | 1255400000 | 1498600000 |
| sp Q7L2H EIF3M    | sp Q7L2H  | 1 | 8  | 8  | 8  | 29  | 42.502 | 1875100000 | 1961400000 | 1552600000 | 1489000000 | 1900900000 | 1741600000 |
| sp Q7L2J MEPCE    | sp Q7L2J  | 1 | 3  | 3  | 3  | 9.1 | 74.354 | 67338000   | 79603000   | 85368000   | 92970000   | 94270000   | 132510000  |
| sp Q7L3B CDC37L1  | sp Q7L3B  | 1 | 1  | 1  | 1  | 4.5 | 38.834 | 0          | 0          | 0          | 0          | 24098000   | 0          |
| sp Q7L4I2 RSRC2   | sp Q7L4I2 | 1 | 2  | 2  | 2  | 8.8 | 50.559 | 0          | 74434000   | 49252000   | 0          | 73705000   | 74833000   |
| sp Q7L52 RRAGA    | sp Q7L52  | 2 | 4  | 4  | 4  | 17  | 36.566 | 0          | 0          | 0          | 0          | 0          | 315210000  |
| sp Q7L57 CYFIP1   | sp Q7L57  | 2 | 13 | 13 | 13 | 12  | 145.18 | 874240000  | 743350000  | 728560000  | 706110000  | 779300000  | 779640000  |
| sp Q7L5D GET4     | sp Q7L5D  | 1 | 2  | 2  | 2  | 8.6 | 36.504 | 0          | 0          | 0          | 0          | 0          | 61014000   |
| sp Q7L5N COPS6    | sp Q7L5N  | 1 | 8  | 8  | 8  | 35  | 36.163 | 1255600000 | 1514800000 | 1291500000 | 1038100000 | 1142000000 | 1055700000 |
| sp Q7L5N LPCAT2   | sp Q7L5N  | 1 | 8  | 8  | 8  | 22  | 60.207 | 250290000  | 233850000  | 226490000  | 177630000  | 185450000  | 251840000  |
| sp Q7L5Y ENOSF1   | sp Q7L5Y  | 1 | 1  | 1  | 1  | 3.8 | 49.786 | 0          | 0          | 0          | 0          | 18712000   | 0          |
| sp Q9H2K TAOK3    | sp Q9H2K  | 2 | 1  | 1  | 1  | 1.4 | 105.4  | 0          | 0          | 0          | 0          | 0          | 62086000   |
| sp Q7LBC KDM3B    | sp Q7LBC  | 1 | 6  | 6  | 6  | 7.2 | 191.58 | 198700000  | 251710000  | 211640000  | 148490000  | 231690000  | 161230000  |
| sp Q7LBR CHMP1B   | sp Q7LBR  | 1 | 2  | 2  | 2  | 7.5 | 22.109 | 133290000  | 0          | 121130000  | 155590000  | 0          | 125960000  |
| sp Q7LGA HS2ST1   | sp Q7LGA  | 1 | 4  | 4  | 4  | 15  | 41.881 | 123690000  | 0          | 0          | 325660000  | 119430000  | 0          |
| sp Q7RTV PHF5A    | sp Q7RTV  | 1 | 5  | 5  | 5  | 48  | 12.405 | 718070000  | 977540000  | 843280000  | 857800000  | 1102100000 | 751890000  |
| sp Q7Z2E APTX     | sp Q7Z2E  | 1 | 2  | 2  | 2  | 11  | 40.74  | 78807000   | 0          | 0          | 68663000   | 0          | 0          |
| sp Q7Z2K ERMP1    | sp Q7Z2K  | 1 | 5  | 5  | 5  | 6   | 100.23 | 124200000  | 0          | 0          | 0          | 0          | 0          |
| sp Q7Z2T TRMT1L   | sp Q7Z2T  | 1 | 4  | 4  | 4  | 10  | 81.746 | 0          | 0          | 0          | 201500000  | 0          | 0          |
| sp Q7Z2W ZC3HAV1  | sp Q7Z2W  | 1 | 26 | 26 | 26 | 41  | 101.43 | 2989500000 | 2993900000 | 2676100000 | 3133900000 | 3633300000 | 4062000000 |
| sp Q7Z2W MRPL21   | sp Q7Z2W  | 1 | 4  | 4  | 4  | 26  | 22.814 | 248270000  | 239650000  | 184610000  | 200320000  | 320490000  | 203900000  |
| sp Q7Z2Z EFL1     | sp Q7Z2Z  | 1 | 8  | 8  | 8  | 12  | 125.43 | 137360000  | 139620000  | 158320000  | 127130000  | 111610000  | 100380000  |
| sp Q7Z3B NUP54    | sp Q7Z3B  | 1 | 4  | 4  | 4  | 9.7 | 55.435 | 231950000  | 280450000  | 223890000  | 311890000  | 351130000  | 226180000  |
| sp Q7Z3C ATG9A    | sp Q7Z3C  | 1 | 3  | 3  | 3  | 4.8 | 94.446 | 0          | 0          | 0          | 0          | 127960000  | 83567000   |
| sp Q7Z3E ARMC9    | sp Q7Z3E  | 1 | 1  | 1  | 1  | 1.8 | 91.818 | 0          | 36970000   | 0          | 0          | 0          | 0          |
| sp Q7Z3J C16orf62 | sp Q7Z3J  | 1 | 6  | 6  | 6  | 9   | 109.56 | 122720000  | 100480000  | 97311000   | 114290000  | 0          | 0          |
| sp Q7Z3K POGZ     | sp Q7Z3K  | 1 | 5  | 5  | 5  | 5.5 | 155.34 | 135130000  | 144160000  | 177540000  | 113690000  | 147580000  | 185220000  |
| sp Q7Z3T ZFYVE16  | sp Q7Z3T  | 1 | 2  | 2  | 2  | 2   | 168.9  | 0          | 0          | 0          | 51578000   | 0          | 0          |
| sp Q7Z3U MON2     | sp Q7Z3U  | 1 | 2  | 2  | 2  | 1.6 | 190.36 | 0          | 41718000   | 34522000   | 39185000   | 0          | 35968000   |
| sp Q7Z40 MYH14    | sp Q7Z40  | 1 | 9  | 1  | 1  | 4.4 | 227.87 | 0          | 0          | 0          | 0          | 0          | 423730000  |
| sp Q7Z41 NUFIP2   | sp Q7Z41  | 1 | 8  | 8  | 8  | 22  | 76.12  | 501990000  | 464090000  | 431350000  | 459470000  | 627970000  | 618070000  |
| sp Q7Z42 SZRD1    | sp Q7Z42  | 1 | 1  | 1  | 1  | 14  | 16.997 | 0          | 0          | 0          | 0          | 0          | 403920000  |
| sp Q7Z43 MAVS     | sp Q7Z43  | 1 | 1  | 1  | 1  | 2.6 | 56.527 | 0          | 0          | 0          | 0          | 64839000   | 0          |
| sp Q7Z46 CLASP1   | sp Q7Z46  | 1 | 11 | 9  | 9  | 10  | 169.45 | 195700000  | 141730000  | 130930000  | 138980000  | 129730000  | 94464000   |
| sp Q7Z47 DHX29    | sp Q7Z47  | 1 | 5  | 5  | 5  | 5.5 | 155.23 | 221950000  | 134150000  | 169510000  | 174230000  | 152740000  | 0          |
| sp Q7Z4G COMMD6   | sp Q7Z4G  | 1 | 1  | 1  | 1  | 15  | 9.638  | 0          | 0          | 0          | 0          | 0          | 69940000   |
| sp Q7Z4G TRMT11   | sp Q7Z4G  | 1 | 1  | 1  | 1  | 2.6 | 53.42  | 0          | 0          | 0          | 0          | 0          | 22765000   |

|                  |           |   |    |    |    |     |        |            |            |            |            |            |            |
|------------------|-----------|---|----|----|----|-----|--------|------------|------------|------------|------------|------------|------------|
| sp Q7Z4H KDELC2  | sp Q7Z4H  | 1 | 2  | 2  | 2  | 6.5 | 58.572 | 75342000   | 54486000   | 0          | 75416000   | 0          | 86533000   |
| sp Q7Z4Q HEATR3  | sp Q7Z4Q  | 1 | 5  | 5  | 5  | 10  | 74.582 | 167010000  | 103470000  | 143290000  | 150870000  | 150670000  | 157900000  |
| sp Q7Z4S KIF21A  | sp Q7Z4S  | 4 | 12 | 12 | 12 | 11  | 187.18 | 326540000  | 219550000  | 393790000  | 496820000  | 411250000  | 202070000  |
| sp Q7Z4V HDGFL2  | sp Q7Z4V  | 1 | 4  | 3  | 3  | 7.6 | 74.316 | 0          | 0          | 368010000  | 0          | 200010000  | 171620000  |
| sp Q7Z4W DCXR    | sp Q7Z4W  | 1 | 7  | 7  | 7  | 42  | 25.913 | 248680000  | 181130000  | 253820000  | 230440000  | 379190000  | 218440000  |
| sp Q7Z5K WAPL    | sp Q7Z5K  | 1 | 4  | 4  | 4  | 5.4 | 132.94 | 195910000  | 174980000  | 131790000  | 82945000   | 0          | 0          |
| sp Q7Z5L IRF2BP2 | sp Q7Z5L  | 1 | 11 | 11 | 8  | 34  | 61.024 | 1089900000 | 937770000  | 919090000  | 918880000  | 1041600000 | 862120000  |
| sp Q7Z6B SRGAP1  | sp Q7Z6B  | 1 | 2  | 2  | 1  | 2   | 124.26 | 109740000  | 0          | 0          | 0          | 0          | 0          |
| sp Q7Z6E RBBP6   | sp Q7Z6E  | 1 | 3  | 3  | 3  | 2.1 | 201.56 | 87329000   | 0          | 0          | 0          | 0          | 0          |
| sp Q7Z6J SH3RF1  | sp Q7Z6J  | 1 | 3  | 3  | 3  | 5   | 93.128 | 0          | 210880000  | 205110000  | 192050000  | 280820000  | 0          |
| sp Q7Z6M RABEPK  | sp Q7Z6M  | 1 | 3  | 3  | 3  | 13  | 40.564 | 140590000  | 0          | 0          | 0          | 0          | 111660000  |
| sp Q7Z6Z HUWE1   | sp Q7Z6Z  | 1 | 55 | 55 | 55 | 20  | 481.89 | 4213000000 | 4356500000 | 4116300000 | 4057000000 | 4147700000 | 3912600000 |
| sp Q7Z73 YTHDF3  | sp Q7Z73  | 1 | 11 | 7  | 5  | 21  | 63.86  | 408350000  | 351410000  | 307610000  | 535920000  | 401500000  | 349190000  |
| sp Q7Z7A CNTRL   | sp Q7Z7A  | 1 | 2  | 2  | 2  | 0.9 | 268.88 | 0          | 0          | 1824000000 | 0          | 0          | 0          |
| sp Q7Z7E UBE2Q1  | sp Q7Z7E  | 1 | 2  | 2  | 2  | 9.2 | 46.126 | 225560000  | 122460000  | 195490000  | 317570000  | 192870000  | 191370000  |
| sp Q7Z7F MRPL55  | sp Q7Z7F  | 1 | 2  | 2  | 2  | 19  | 15.128 | 0          | 0          | 0          | 0          | 29472000   | 44987000   |
| sp Q7Z7H TMED4   | sp Q7Z7H  | 1 | 4  | 3  | 3  | 23  | 25.943 | 123800000  | 0          | 142660000  | 169680000  | 125280000  | 0          |
| sp Q7Z7H MRPL10  | sp Q7Z7H  | 1 | 1  | 1  | 1  | 7.3 | 29.282 | 33071000   | 39425000   | 109160000  | 39700000   | 28312000   | 42293000   |
| sp Q7Z7K CMC1    | sp Q7Z7K  | 1 | 1  | 1  | 1  | 16  | 12.49  | 54393000   | 0          | 0          | 0          | 0          | 0          |
| sp Q7Z7K CENPV   | sp Q7Z7K  | 1 | 2  | 2  | 2  | 9.8 | 29.946 | 0          | 0          | 0          | 93388000   | 0          | 0          |
| sp Q86SF GALNT7  | sp Q86SF  | 1 | 12 | 12 | 12 | 23  | 75.388 | 1005100000 | 756130000  | 1029900000 | 970900000  | 991230000  | 1159700000 |
| sp Q86SX GLRX5   | sp Q86SX  | 1 | 3  | 3  | 3  | 28  | 16.628 | 336680000  | 366000000  | 336530000  | 371940000  | 423260000  | 287880000  |
| sp Q86TB PATL1   | sp Q86TB  | 1 | 3  | 3  | 3  | 7.1 | 86.849 | 73819000   | 0          | 0          | 0          | 0          | 0          |
| sp Q86TG PEG10   | sp Q86TG  | 1 | 3  | 3  | 3  | 8.9 | 80.172 | 204900000  | 0          | 158100000  | 262920000  | 200890000  | 155680000  |
| sp Q86TI2 DPP9   | sp Q86TI2 | 1 | 5  | 5  | 5  | 7.6 | 98.262 | 83493000   | 91598000   | 0          | 0          | 0          | 103630000  |
| sp Q86TM SYVN1   | sp Q86TM  | 1 | 1  | 1  | 1  | 4.1 | 67.684 | 0          | 0          | 0          | 0          | 0          | 30425000   |
| sp Q86TS MRPL52  | sp Q86TS  | 1 | 2  | 2  | 2  | 27  | 13.664 | 118210000  | 100910000  | 90326000   | 77611000   | 126470000  | 99537000   |
| sp Q86TU SETD3   | sp Q86TU  | 1 | 6  | 6  | 6  | 14  | 67.256 | 230790000  | 238700000  | 250830000  | 245480000  | 272200000  | 234760000  |
| sp Q86TX ACOT1   | sp Q86TX  | 2 | 8  | 8  | 8  | 25  | 46.277 | 372050000  | 343500000  | 317930000  | 303370000  | 379770000  | 363470000  |
| sp Q86U0 RBM23   | sp Q86U0  | 1 | 1  | 1  | 1  | 2.5 | 48.73  | 0          | 0          | 0          | 0          | 2667200    | 0          |
| sp Q86U3 NOP9    | sp Q86U3  | 1 | 5  | 5  | 5  | 12  | 69.437 | 0          | 252580000  | 231330000  | 0          | 261310000  | 0          |
| sp Q86U4 PABPN1  | sp Q86U4  | 2 | 5  | 5  | 5  | 16  | 32.749 | 667530000  | 716670000  | 729470000  | 679870000  | 585160000  | 594600000  |
| sp Q86U4 METTLL3 | sp Q86U4  | 1 | 1  | 1  | 1  | 2.1 | 64.473 | 0          | 0          | 0          | 0          | 0          | 70627000   |
| sp Q86U8 PBRM1   | sp Q86U8  | 1 | 6  | 6  | 6  | 5.6 | 192.95 | 126130000  | 92057000   | 119400000  | 127570000  | 157900000  | 121380000  |
| sp Q86U9 YRDC    | sp Q86U9  | 1 | 3  | 3  | 3  | 14  | 29.328 | 193780000  | 177400000  | 0          | 0          | 130100000  | 0          |
| sp Q86UE MTDH    | sp Q86UE  | 1 | 17 | 17 | 17 | 41  | 63.836 | 1777000000 | 2000000000 | 1458200000 | 1599700000 | 1852600000 | 1483700000 |
| sp Q86UK ZNF598  | sp Q86UK  | 1 | 3  | 3  | 3  | 5.1 | 98.636 | 112510000  | 151700000  | 0          | 97627000   | 0          | 0          |
| sp Q86UL GPAT4   | sp Q86UL  | 1 | 1  | 1  | 1  | 2.6 | 52.07  | 0          | 0          | 0          | 0          | 0          | 34613000   |
| sp Q86UP KTN1    | sp Q86UP  | 2 | 51 | 51 | 51 | 44  | 156.27 | 6666800000 | 7116300000 | 5862900000 | 6043100000 | 6276700000 | 6196100000 |

|           |         |           |   |    |    |    |     |        |            |            |            |            |            |            |
|-----------|---------|-----------|---|----|----|----|-----|--------|------------|------------|------------|------------|------------|------------|
| sp Q86UP  | ZFHX4   | sp Q86UP  | 1 | 1  | 1  | 1  | 0.6 | 393.73 | 0          | 0          | 0          | 0          | 651400000  | 0          |
| sp Q86UV  | USP48   | sp Q86UV  | 1 | 6  | 6  | 6  | 9   | 119.03 | 332780000  | 467230000  | 296600000  | 404720000  | 295390000  | 154040000  |
| sp Q86UY  | NAA40   | sp Q86UY  | 1 | 1  | 1  | 1  | 5.1 | 27.194 | 0          | 0          | 0          | 0          | 0          | 50605000   |
| sp Q86V2  | AACS    | sp Q86V2  | 1 | 4  | 4  | 4  | 5.8 | 75.143 | 70636000   | 56172000   | 48048000   | 28958000   | 0          | 0          |
| sp Q86V4  | LUZP1   | sp Q86V4  | 1 | 9  | 9  | 9  | 10  | 120.27 | 318930000  | 180820000  | 199320000  | 172260000  | 236470000  | 0          |
| sp Q86V8  | ALYREF  | sp Q86V8  | 1 | 7  | 7  | 7  | 35  | 26.888 | 4419100000 | 4304500000 | 4485000000 | 3472800000 | 4122900000 | 4478300000 |
| sp Q86V8  | GPR180  | sp Q86V8  | 1 | 1  | 1  | 1  | 3.4 | 49.395 | 0          | 0          | 0          | 0          | 0          | 36503000   |
| sp Q86VI3 | IQGAP3  | sp Q86VI3 | 1 | 3  | 1  | 1  | 2.4 | 184.7  | 0          | 0          | 0          | 0          | 0          | 7928700    |
| sp Q86VM  | ZC3H18  | sp Q86VM  | 1 | 4  | 4  | 4  | 7.1 | 106.38 | 97790000   | 117940000  | 159820000  | 142960000  | 210550000  | 150990000  |
| sp Q86VN  | VPS36   | sp Q86VN  | 1 | 1  | 1  | 1  | 3.4 | 43.816 | 0          | 0          | 0          | 0          | 0          | 35048000   |
| sp Q86VP  | CAND1   | sp Q86VP  | 2 | 37 | 37 | 37 | 38  | 136.37 | 5914600000 | 5645600000 | 5528500000 | 5166600000 | 5346800000 | 5238500000 |
| sp Q86VS  | HOOK3   | sp Q86VS  | 1 | 2  | 2  | 2  | 5.2 | 83.125 | 0          | 0          | 0          | 0          | 0          | 413470000  |
| sp Q86VU  | COMTD1  | sp Q86VU  | 1 | 1  | 1  | 1  | 5.7 | 28.808 | 0          | 0          | 0          | 0          | 0          | 38934000   |
| sp Q86VV  | RTTN    | sp Q86VV  | 1 | 1  | 1  | 1  | 0.3 | 248.63 | 0          | 0          | 0          | 0          | 0          | 515810000  |
| sp Q86VV  | SESTD1  | sp Q86VV  | 1 | 2  | 2  | 2  | 4   | 79.347 | 0          | 0          | 0          | 35296000   | 0          | 0          |
| sp Q86VX  | COMMD7  | sp Q86VX  | 1 | 1  | 1  | 1  | 4.5 | 22.54  | 0          | 0          | 0          | 0          | 15940000   | 0          |
| sp Q86VZ  | SGMS1   | sp Q86VZ  | 1 | 2  | 2  | 2  | 6.1 | 48.616 | 0          | 0          | 0          | 58319000   | 152740000  | 0          |
| sp Q86W4  | THOC6   | sp Q86W4  | 1 | 7  | 7  | 7  | 33  | 37.535 | 372750000  | 380990000  | 337260000  | 374820000  | 337190000  | 322000000  |
| sp Q86W5  | METTL16 | sp Q86W5  | 1 | 4  | 4  | 4  | 7.3 | 63.62  | 91726000   | 70946000   | 108570000  | 106880000  | 83774000   | 132270000  |
| sp Q86W9  | PPFIBP1 | sp Q86W9  | 1 | 7  | 7  | 7  | 10  | 114.02 | 209910000  | 213560000  | 210210000  | 158020000  | 169410000  | 201390000  |
| sp Q86WE  | ZC3HC1  | sp Q86WE  | 1 | 2  | 2  | 2  | 6.6 | 55.261 | 0          | 0          | 59581000   | 0          | 0          | 0          |
| sp Q86WC  | OSTM1   | sp Q86WC  | 1 | 1  | 1  | 1  | 3.3 | 37.256 | 0          | 0          | 0          | 0          | 0          | 43693000   |
| sp Q86WC  | NR2C2AF | sp Q86WC  | 1 | 3  | 3  | 3  | 35  | 15.876 | 90617000   | 0          | 67015000   | 87499000   | 88248000   | 0          |
| sp Q86WF  | CCDC25  | sp Q86WF  | 1 | 3  | 3  | 3  | 19  | 24.479 | 0          | 0          | 0          | 0          | 101210000  | 0          |
| sp Q86X5  | CARM1   | sp Q86X5  | 1 | 3  | 3  | 3  | 9.7 | 65.853 | 181180000  | 200160000  | 0          | 170790000  | 181150000  | 0          |
| sp Q86X7  | NIT1    | sp Q86X7  | 1 | 3  | 3  | 3  | 9.5 | 35.896 | 207380000  | 0          | 0          | 0          | 257370000  | 0          |
| sp Q86X8  | COMMD2  | sp Q86X8  | 1 | 3  | 3  | 3  | 26  | 22.745 | 0          | 58022000   | 143990000  | 0          | 0          | 66863000   |
| sp Q86XA  | HEATR5A | sp Q86XA  | 1 | 2  | 2  | 2  | 1.6 | 222    | 0          | 0          | 55372000   | 0          | 0          | 0          |
| sp Q86XI2 | NCAPG2  | sp Q86XI2 | 1 | 5  | 5  | 5  | 6.1 | 130.96 | 106530000  | 158330000  | 109360000  | 105670000  | 142470000  | 80794000   |
| sp Q86XL  | ANKLE2  | sp Q86XL  | 1 | 8  | 8  | 8  | 14  | 104.11 | 1191900000 | 1093800000 | 1443900000 | 1237800000 | 1317000000 | 958960000  |
| sp Q86XP  | DDX42   | sp Q86XP  | 1 | 19 | 19 | 19 | 31  | 102.97 | 1541600000 | 1361500000 | 1458800000 | 1432900000 | 1343700000 | 1500800000 |
| sp Q86XZ  | SPATS2  | sp Q86XZ  | 1 | 2  | 2  | 2  | 6.4 | 59.544 | 0          | 84432000   | 0          | 0          | 0          | 0          |
| sp Q86Y3  | NDUFA11 | sp Q86Y3  | 1 | 4  | 4  | 4  | 47  | 14.852 | 226100000  | 235640000  | 256210000  | 192150000  | 274270000  | 240110000  |
| sp Q86Y5  | DNAAF5  | sp Q86Y5  | 1 | 13 | 13 | 13 | 23  | 93.52  | 783540000  | 791320000  | 725170000  | 591420000  | 686520000  | 601640000  |
| sp Q86Y8  | STX12   | sp Q86Y8  | 1 | 3  | 3  | 3  | 15  | 31.642 | 0          | 0          | 161120000  | 159550000  | 0          | 0          |
| sp Q86YC  | CPNE8   | sp Q86YC  | 3 | 4  | 3  | 3  | 9.2 | 63.107 | 0          | 179640000  | 0          | 97172000   | 143880000  | 121360000  |
| sp Q8IU8  | IRF2BP1 | sp Q8IU8  | 1 | 4  | 3  | 3  | 8.9 | 61.687 | 0          | 0          | 0          | 0          | 76319000   | 0          |
| sp Q8IU8  | CAMK1D  | sp Q8IU8  | 2 | 4  | 4  | 4  | 14  | 42.913 | 86232000   | 103130000  | 108830000  | 90999000   | 107830000  | 87460000   |
| sp Q8IUD  | ERC1    | sp Q8IUD  | 1 | 10 | 10 | 10 | 13  | 128.08 | 411270000  | 316340000  | 341630000  | 309790000  | 438080000  | 505140000  |

|                    |                    |   |    |    |    |     |        |            |            |            |            |            |            |
|--------------------|--------------------|---|----|----|----|-----|--------|------------|------------|------------|------------|------------|------------|
| sp Q8IUE6 HIST2H2A | sp Q8IUE6 HIST2H2A | 1 | 2  | 1  | 1  | 12  | 13.995 | 0          | 0          | 0          | 0          | 0          | 1362900000 |
| sp Q8IUF8 RIOX2    | sp Q8IUF8 RIOX2    | 1 | 2  | 2  | 2  | 8.8 | 52.8   | 0          | 0          | 0          | 0          | 22206000   | 0          |
| sp Q8IUI8 CRLF3    | sp Q8IUI8 CRLF3    | 1 | 1  | 1  | 1  | 5.7 | 49.765 | 0          | 0          | 0          | 0          | 50009000   | 0          |
| sp Q8IUR5 TRAPPC5  | sp Q8IUR5 TRAPPC5  | 1 | 3  | 3  | 3  | 27  | 20.783 | 0          | 133770000  | 0          | 0          | 0          | 0          |
| sp Q8IV08 PLD3     | sp Q8IV08 PLD3     | 1 | 4  | 4  | 4  | 11  | 54.705 | 203830000  | 172620000  | 180170000  | 164040000  | 141490000  | 153470000  |
| sp Q8IV48 ERI1     | sp Q8IV48 ERI1     | 1 | 1  | 1  | 1  | 4.3 | 40.063 | 0          | 0          | 0          | 0          | 0          | 166420000  |
| sp Q8IVD9 NUDCD3   | sp Q8IVD9 NUDCD3   | 1 | 3  | 3  | 3  | 12  | 40.822 | 0          | 111240000  | 93333000   | 0          | 74483000   | 0          |
| sp Q8IVF2 AHNAK2   | sp Q8IVF2 AHNAK2   | 1 | 61 | 59 | 59 | 29  | 616.62 | 5559200000 | 5515100000 | 5419300000 | 4804500000 | 4969800000 | 5295000000 |
| sp Q8IVL5 P3H2     | sp Q8IVL5 P3H2     | 1 | 2  | 1  | 1  | 3.5 | 80.984 | 0          | 0          | 0          | 0          | 21794000   | 0          |
| sp Q8IVL6 P3H3     | sp Q8IVL6 P3H3     | 1 | 7  | 7  | 7  | 17  | 81.836 | 95502000   | 153920000  | 150990000  | 190560000  | 182680000  | 149220000  |
| sp Q8IVM1 CCDC50   | sp Q8IVM1 CCDC50   | 1 | 4  | 4  | 4  | 17  | 35.822 | 0          | 294420000  | 151970000  | 155590000  | 187400000  | 175430000  |
| sp Q8IVP5 FUNDC1   | sp Q8IVP5 FUNDC1   | 1 | 1  | 1  | 1  | 11  | 17.177 | 14175000   | 0          | 0          | 18152000   | 15626000   | 0          |
| sp Q8IVS2 MCAT     | sp Q8IVS2 MCAT     | 1 | 6  | 6  | 6  | 30  | 42.961 | 299970000  | 311120000  | 0          | 201500000  | 265610000  | 0          |
| sp Q8IVT2 MISP     | sp Q8IVT2 MISP     | 1 | 16 | 16 | 16 | 38  | 75.356 | 1238700000 | 1040900000 | 1194200000 | 1122200000 | 1311200000 | 1119300000 |
| sp Q8IVV2 LOXHD1   | sp Q8IVV2 LOXHD1   | 1 | 1  | 1  | 1  | 0.4 | 221.94 | 0          | 0          | 0          | 0          | 0          | 29723000   |
| sp Q8IW11 APLF     | sp Q8IW11 APLF     | 1 | 1  | 1  | 1  | 3.9 | 56.955 | 0          | 0          | 0          | 0          | 0          | 134880000  |
| sp Q8IWA1 WDR75    | sp Q8IWA1 WDR75    | 1 | 7  | 7  | 7  | 12  | 94.498 | 183910000  | 141240000  | 147070000  | 117360000  | 124760000  | 228590000  |
| sp Q8IWA1 MFN1     | sp Q8IWA1 MFN1     | 1 | 2  | 2  | 2  | 4.9 | 84.159 | 103230000  | 0          | 0          | 0          | 0          | 0          |
| sp Q8IWB1 ITPRIP   | sp Q8IWB1 ITPRIP   | 2 | 8  | 8  | 8  | 25  | 62.059 | 130550000  | 141510000  | 133760000  | 287810000  | 213340000  | 229830000  |
| sp Q8IWB1 WDFY1    | sp Q8IWB1 WDFY1    | 1 | 7  | 7  | 7  | 23  | 46.323 | 359900000  | 323140000  | 366850000  | 333330000  | 386620000  | 362720000  |
| sp Q8IWE1 FAM114A  | sp Q8IWE1 FAM114A  | 1 | 6  | 6  | 6  | 15  | 60.741 | 344030000  | 368350000  | 401670000  | 323440000  | 461480000  | 335260000  |
| sp Q8IWJ1 GCC2     | sp Q8IWJ1 GCC2     | 1 | 3  | 3  | 3  | 2   | 195.91 | 0          | 0          | 0          | 0          | 0          | 80187000   |
| sp Q8IWR1 ZC3H7A   | sp Q8IWR1 ZC3H7A   | 1 | 3  | 3  | 3  | 5.9 | 110.54 | 43008000   | 0          | 0          | 0          | 0          | 0          |
| sp Q8IWS1 PHF6     | sp Q8IWS1 PHF6     | 1 | 9  | 9  | 9  | 32  | 41.29  | 947010000  | 1068900000 | 1028400000 | 792740000  | 860550000  | 967730000  |
| sp Q8IWT1 ZBTB80S  | sp Q8IWT1 ZBTB80S  | 1 | 1  | 1  | 1  | 10  | 19.491 | 0          | 0          | 0          | 0          | 29115000   | 0          |
| sp Q8IWT1 LRRC8A   | sp Q8IWT1 LRRC8A   | 1 | 6  | 6  | 5  | 8.6 | 94.198 | 78750000   | 95916000   | 0          | 107150000  | 50481000   | 0          |
| sp Q8IWW1 UBR1     | sp Q8IWW1 UBR1     | 1 | 2  | 2  | 2  | 2.1 | 200.21 | 0          | 0          | 0          | 0          | 23066000   | 0          |
| sp Q8IWX1 CHERP    | sp Q8IWX1 CHERP    | 1 | 9  | 9  | 9  | 20  | 103.7  | 399480000  | 475040000  | 440430000  | 419190000  | 403380000  | 520980000  |
| sp Q8IWZ1 ANKHD1   | sp Q8IWZ1 ANKHD1   | 1 | 11 | 11 | 7  | 7.1 | 269.45 | 316370000  | 340710000  | 268030000  | 294250000  | 340680000  | 267230000  |
| sp Q8IWZ1 SUGP1    | sp Q8IWZ1 SUGP1    | 1 | 1  | 1  | 1  | 2.8 | 72.47  | 0          | 0          | 0          | 0          | 45714000   | 0          |
| sp Q8IX01 SUGP2    | sp Q8IX01 SUGP2    | 1 | 5  | 5  | 5  | 6.5 | 120.21 | 76976000   | 105660000  | 0          | 99958000   | 72072000   | 97828000   |
| sp Q8IX03 WWC1     | sp Q8IX03 WWC1     | 1 | 1  | 1  | 1  | 3   | 125.3  | 0          | 0          | 0          | 0          | 0          | 6694700    |
| sp Q8IX12 CCAR1    | sp Q8IX12 CCAR1    | 1 | 8  | 8  | 8  | 11  | 132.82 | 432510000  | 511140000  | 432560000  | 477190000  | 559490000  | 653460000  |
| sp Q8IX18 DHX40    | sp Q8IX18 DHX40    | 1 | 1  | 1  | 1  | 1.7 | 88.559 | 0          | 0          | 0          | 0          | 13900000   | 0          |
| sp Q8IXB1 DNAJC10  | sp Q8IXB1 DNAJC10  | 1 | 8  | 8  | 8  | 14  | 91.079 | 370230000  | 467780000  | 344910000  | 450170000  | 471190000  | 414650000  |
| sp Q8IXH1 NELFCD   | sp Q8IXH1 NELFCD   | 1 | 8  | 8  | 8  | 17  | 66.246 | 217220000  | 191240000  | 406620000  | 180230000  | 209780000  | 344250000  |
| sp Q8IXI1 RHOT2    | sp Q8IXI1 RHOT2    | 1 | 6  | 6  | 5  | 19  | 68.117 | 317110000  | 401890000  | 384950000  | 475760000  | 522820000  | 508750000  |
| sp Q8IXI2 RHOT1    | sp Q8IXI2 RHOT1    | 1 | 2  | 1  | 1  | 4.4 | 70.783 | 0          | 0          | 0          | 0          | 0          | 28434000   |
| sp Q8IXM1 MRPL41   | sp Q8IXM1 MRPL41   | 1 | 3  | 3  | 3  | 42  | 15.383 | 198480000  | 142700000  | 199470000  | 256720000  | 297930000  | 250500000  |

|                    |                    |   |    |    |    |     |        |            |            |            |            |            |            |
|--------------------|--------------------|---|----|----|----|-----|--------|------------|------------|------------|------------|------------|------------|
| sp Q8IXQ3 C9orf40  | sp Q8IXQ3 C9orf40  | 1 | 1  | 1  | 1  | 14  | 21.063 | 0          | 0          | 0          | 0          | 0          | 14356000   |
| sp Q8IXS6 PALM2    | sp Q8IXS6 PALM2    | 1 | 3  | 3  | 3  | 12  | 42.185 | 0          | 0          | 0          | 105570000  | 137980000  | 109730000  |
| sp Q8IXT5 RBM12B   | sp Q8IXT5 RBM12B   | 1 | 2  | 2  | 2  | 2.3 | 118.1  | 0          | 0          | 0          | 0          | 23131000   | 0          |
| sp Q8IXU6 SLC35F2  | sp Q8IXU6 SLC35F2  | 1 | 2  | 2  | 2  | 14  | 41.211 | 0          | 0          | 0          | 39790000   | 52904000   | 0          |
| sp Q8IY17 PNPLA6   | sp Q8IY17 PNPLA6   | 1 | 2  | 2  | 2  | 2.4 | 149.99 | 0          | 0          | 0          | 0          | 0          | 23031000   |
| sp Q8IY21 DDX60    | sp Q8IY21 DDX60    | 1 | 3  | 3  | 3  | 2.2 | 197.85 | 33122000   | 38378000   | 0          | 0          | 0          | 0          |
| sp Q8IY37 DHX37    | sp Q8IY37 DHX37    | 1 | 4  | 4  | 4  | 5.5 | 129.54 | 0          | 0          | 0          | 0          | 93395000   | 0          |
| sp Q8IY50 SLC35F3  | sp Q8IY50 SLC35F3  | 1 | 1  | 1  | 1  | 1.7 | 46.817 | 0          | 0          | 0          | 0          | 0          | 1269500000 |
| sp Q8IY67 RAVER1   | sp Q8IY67 RAVER1   | 1 | 10 | 10 | 10 | 31  | 63.876 | 465760000  | 266550000  | 403930000  | 629470000  | 400980000  | 376840000  |
| sp Q8IY81 FTSJ3    | sp Q8IY81 FTSJ3    | 1 | 16 | 16 | 16 | 31  | 96.557 | 981760000  | 1214100000 | 1108100000 | 1177700000 | 1036900000 | 1040400000 |
| sp Q8IY95 TMEM192  | sp Q8IY95 TMEM192  | 1 | 2  | 2  | 2  | 11  | 30.922 | 0          | 0          | 106310000  | 115900000  | 0          | 0          |
| sp Q8IYB3 SRRM1    | sp Q8IYB3 SRRM1    | 1 | 7  | 7  | 7  | 11  | 102.33 | 973950000  | 1037900000 | 780430000  | 823780000  | 1031600000 | 1014100000 |
| sp Q8IYB5 SMAP1    | sp Q8IYB5 SMAP1    | 1 | 2  | 2  | 2  | 7.5 | 50.386 | 0          | 0          | 50395000   | 78465000   | 0          | 0          |
| sp Q8IYB8 SUPV3L1  | sp Q8IYB8 SUPV3L1  | 1 | 3  | 3  | 3  | 4.5 | 87.99  | 0          | 124180000  | 0          | 0          | 0          | 0          |
| sp Q8IYD1 GSPT2    | sp Q8IYD1 GSPT2    | 1 | 8  | 1  | 1  | 13  | 68.882 | 0          | 558740000  | 362540000  | 407850000  | 0          | 0          |
| sp Q8IYI6 EXOC8    | sp Q8IYI6 EXOC8    | 1 | 3  | 3  | 3  | 8.3 | 81.798 | 0          | 0          | 0          | 97466000   | 0          | 0          |
| sp Q8IYL3 C1orf174 | sp Q8IYL3 C1orf174 | 1 | 1  | 1  | 1  | 5.8 | 25.977 | 0          | 0          | 0          | 0          | 0          | 104560000  |
| sp Q8IYS2 KIAA2013 | sp Q8IYS2 KIAA2013 | 1 | 2  | 2  | 2  | 4.1 | 69.156 | 0          | 89954000   | 0          | 0          | 0          | 96466000   |
| sp Q8IYT4 KATNAL2  | sp Q8IYT4 KATNAL2  | 1 | 1  | 1  | 1  | 2.2 | 61.252 | 0          | 0          | 0          | 0          | 0          | 1164400000 |
| sp Q8IYU8 MICU2    | sp Q8IYU8 MICU2    | 1 | 1  | 1  | 1  | 3.9 | 49.666 | 0          | 0          | 0          | 0          | 0          | 48519000   |
| sp Q8IZ69 TRMT2A   | sp Q8IZ69 TRMT2A   | 1 | 4  | 4  | 4  | 10  | 68.725 | 91841000   | 84360000   | 81905000   | 86962000   | 98590000   | 102820000  |
| sp Q8IZ83 ALDH16A  | sp Q8IZ83 ALDH16A  | 1 | 2  | 2  | 2  | 6.7 | 85.126 | 0          | 0          | 0          | 0          | 0          | 59692000   |
| sp Q8IZH2 XRN1     | sp Q8IZH2 XRN1     | 1 | 2  | 2  | 2  | 1.5 | 194.1  | 0          | 52827000   | 0          | 0          | 0          | 42672000   |
| sp Q8IZL8 PELP1    | sp Q8IZL8 PELP1    | 1 | 13 | 13 | 13 | 18  | 119.7  | 1102800000 | 927710000  | 1168800000 | 1114200000 | 1158300000 | 1237800000 |
| sp Q8IZP0 ABI1     | sp Q8IZP0 ABI1     | 1 | 4  | 4  | 4  | 13  | 55.08  | 0          | 0          | 0          | 0          | 0          | 168680000  |
| sp Q8IZW3 TNS4     | sp Q8IZW3 TNS4     | 1 | 2  | 2  | 2  | 3.9 | 76.763 | 0          | 0          | 0          | 7691000    | 0          | 0          |
| sp Q8N0U1 VKORC1L  | sp Q8N0U1 VKORC1L  | 1 | 3  | 3  | 3  | 15  | 19.835 | 139410000  | 102420000  | 0          | 232250000  | 156610000  | 0          |
| sp Q8N0X1 SPART    | sp Q8N0X1 SPART    | 1 | 6  | 6  | 6  | 14  | 72.832 | 434340000  | 444360000  | 460420000  | 365420000  | 401460000  | 0          |
| sp Q8N101 MIER1    | sp Q8N101 MIER1    | 1 | 3  | 3  | 3  | 9.4 | 57.983 | 74117000   | 72643000   | 57749000   | 0          | 52593000   | 0          |
| sp Q8N121 RPTOR    | sp Q8N121 RPTOR    | 1 | 3  | 3  | 3  | 4   | 149.04 | 0          | 0          | 0          | 0          | 147150000  | 0          |
| sp Q8N122 CNPY4    | sp Q8N122 CNPY4    | 1 | 2  | 2  | 2  | 10  | 28.309 | 0          | 0          | 0          | 0          | 43667000   | 0          |
| sp Q8N161 CCAR2    | sp Q8N161 CCAR2    | 1 | 19 | 19 | 19 | 34  | 102.9  | 1481900000 | 1161500000 | 1580500000 | 1332900000 | 1617300000 | 1427000000 |
| sp Q8N181 NDUFAF2  | sp Q8N181 NDUFAF2  | 1 | 10 | 10 | 10 | 59  | 19.856 | 756370000  | 931470000  | 979920000  | 981550000  | 1094700000 | 966440000  |
| sp Q8N1B1 VPS52    | sp Q8N1B1 VPS52    | 1 | 4  | 4  | 4  | 7.6 | 82.22  | 0          | 1027000000 | 0          | 0          | 0          | 0          |
| sp Q8N1F1 NUP93    | sp Q8N1F1 NUP93    | 1 | 23 | 23 | 23 | 32  | 93.487 | 2446900000 | 2163700000 | 2298300000 | 2296400000 | 2695600000 | 2547400000 |
| sp Q8N1G1 CMTR1    | sp Q8N1G1 CMTR1    | 1 | 7  | 7  | 7  | 11  | 95.32  | 119970000  | 148730000  | 117570000  | 115670000  | 183640000  | 132100000  |
| sp Q8N1G1 LRRC47   | sp Q8N1G1 LRRC47   | 1 | 19 | 19 | 19 | 52  | 63.472 | 1884900000 | 1902400000 | 1771000000 | 1849300000 | 1884200000 | 1861900000 |
| sp Q8N201 INTS1    | sp Q8N201 INTS1    | 1 | 1  | 1  | 1  | 0.8 | 244.29 | 0          | 0          | 0          | 0          | 10453000   | 0          |
| sp Q8N251 HIST3H2B | sp Q8N251 HIST3H2B | 1 | 6  | 1  | 1  | 41  | 13.908 | 0          | 0          | 0          | 0          | 0          | 135960000  |

|          |         |          |   |    |    |    |     |        |            |            |            |            |            |            |
|----------|---------|----------|---|----|----|----|-----|--------|------------|------------|------------|------------|------------|------------|
| sp Q8N2F | ARMC10  | sp Q8N2F | 1 | 2  | 2  | 2  | 8.2 | 37.54  | 0          | 0          | 28597000   | 0          | 0          | 0          |
| sp Q8N2G | GHDC    | sp Q8N2G | 1 | 1  | 1  | 1  | 2.3 | 57.522 | 0          | 0          | 0          | 21173000   | 0          | 0          |
| sp Q8N2H | SYS1    | sp Q8N2H | 1 | 1  | 1  | 1  | 14  | 17.615 | 0          | 0          | 0          | 0          | 0          | 21508000   |
| sp Q8N2U | TMEM256 | sp Q8N2U | 1 | 1  | 1  | 1  | 7.1 | 11.741 | 0          | 0          | 0          | 0          | 124710000  | 0          |
| sp Q8N33 | GPD1L   | sp Q8N33 | 1 | 2  | 2  | 2  | 6   | 38.418 | 0          | 151820000  | 95201000   | 110200000  | 0          | 176360000  |
| sp Q8N35 | SLC35F6 | sp Q8N35 | 1 | 2  | 2  | 2  | 7   | 40.214 | 0          | 0          | 0          | 0          | 0          | 184410000  |
| sp Q8N39 | ARHGAP  | sp Q8N39 | 1 | 6  | 6  | 6  | 14  | 74.976 | 119800000  | 159360000  | 171700000  | 146290000  | 150410000  | 121000000  |
| sp Q8N3C | ASCC3   | sp Q8N3C | 1 | 18 | 18 | 18 | 14  | 251.46 | 400560000  | 401530000  | 527650000  | 371150000  | 316250000  | 387180000  |
| sp Q8N3D | EHBP1L1 | sp Q8N3D | 1 | 7  | 7  | 7  | 7.5 | 161.85 | 264850000  | 284810000  | 314190000  | 221600000  | 186830000  | 198310000  |
| sp Q8N3E | PLCD3   | sp Q8N3E | 1 | 2  | 2  | 2  | 5.2 | 89.257 | 0          | 0          | 0          | 143670000  | 0          | 0          |
| sp Q8N3R | MPP5    | sp Q8N3R | 1 | 2  | 2  | 2  | 3.9 | 77.293 | 0          | 0          | 0          | 0          | 0          | 16224000   |
| sp Q8N3U | STAG2   | sp Q8N3U | 3 | 12 | 12 | 12 | 15  | 141.32 | 490220000  | 524940000  | 759650000  | 604000000  | 701120000  | 573910000  |
| sp Q8N3V | SYNPO   | sp Q8N3V | 1 | 5  | 5  | 5  | 9.4 | 99.462 | 0          | 248560000  | 0          | 0          | 0          | 0          |
| sp Q8N3X | FNBP4   | sp Q8N3X | 1 | 4  | 4  | 4  | 5.7 | 110.26 | 123260000  | 135440000  | 142510000  | 121170000  | 154520000  | 107600000  |
| sp Q8N4C | MINK1   | sp Q8N4C | 1 | 2  | 1  | 1  | 1.5 | 149.82 | 0          | 0          | 0          | 0          | 27255000   | 0          |
| sp Q8N4H | TOMM5   | sp Q8N4H | 1 | 3  | 3  | 3  | 29  | 6.0352 | 364300000  | 414060000  | 364280000  | 389380000  | 396340000  | 452170000  |
| sp Q8N4G | ZADH2   | sp Q8N4G | 1 | 1  | 1  | 1  | 2.4 | 40.14  | 0          | 0          | 0          | 0          | 0          | 23459000   |
| sp Q8N4G | CHCHD4  | sp Q8N4G | 1 | 5  | 5  | 5  | 46  | 15.996 | 366480000  | 247630000  | 318710000  | 282820000  | 500180000  | 443150000  |
| sp Q8N4V | MMGT1   | sp Q8N4V | 1 | 3  | 3  | 3  | 25  | 14.686 | 196350000  | 154830000  | 96449000   | 119550000  | 141950000  | 117730000  |
| sp Q8N54 | OGFOD1  | sp Q8N54 | 1 | 8  | 8  | 8  | 19  | 63.245 | 393820000  | 327640000  | 392330000  | 416650000  | 347620000  | 384470000  |
| sp Q8N55 | AFAP1   | sp Q8N55 | 1 | 3  | 3  | 3  | 4.7 | 80.724 | 0          | 49471000   | 28640000   | 78229000   | 69629000   | 0          |
| sp Q8N58 | TTC39C  | sp Q8N58 | 1 | 1  | 1  | 1  | 2.9 | 65.869 | 0          | 0          | 34350000   | 0          | 0          | 0          |
| sp Q8N5A | ZGPAT   | sp Q8N5A | 1 | 2  | 2  | 2  | 5.6 | 57.358 | 460140000  | 497890000  | 0          | 349230000  | 280990000  | 472630000  |
| sp Q8N5G | SMIM20  | sp Q8N5G | 1 | 1  | 1  | 1  | 21  | 7.7019 | 0          | 0          | 0          | 0          | 0          | 39058000   |
| sp Q8N5K | CISD2   | sp Q8N5K | 1 | 4  | 4  | 4  | 39  | 15.278 | 397390000  | 387620000  | 364320000  | 506540000  | 391700000  | 468120000  |
| sp Q8N5L | RPP25L  | sp Q8N5L | 1 | 1  | 1  | 1  | 14  | 17.631 | 0          | 0          | 0          | 0          | 0          | 13640000   |
| sp Q8N5M | TTC9C   | sp Q8N5M | 1 | 4  | 4  | 4  | 27  | 20.012 | 580800000  | 371290000  | 466230000  | 0          | 397560000  | 455740000  |
| sp Q8N5M | JAGN1   | sp Q8N5M | 1 | 2  | 2  | 2  | 13  | 21.125 | 308610000  | 346780000  | 0          | 342160000  | 331750000  | 413840000  |
| sp Q8N5N | MRPL50  | sp Q8N5N | 1 | 3  | 3  | 3  | 28  | 18.325 | 0          | 114040000  | 0          | 207760000  | 508330000  | 0          |
| sp Q8N68 | CPSF7   | sp Q8N68 | 1 | 8  | 8  | 8  | 22  | 52.049 | 378280000  | 469650000  | 379690000  | 545590000  | 454230000  | 418620000  |
| sp Q8N6H | ARFGAP2 | sp Q8N6H | 1 | 9  | 9  | 9  | 23  | 56.72  | 306120000  | 277820000  | 270510000  | 272580000  | 240920000  | 311350000  |
| sp Q8N6L | KRTCAP2 | sp Q8N6L | 1 | 1  | 1  | 1  | 13  | 14.678 | 0          | 0          | 0          | 0          | 0          | 189590000  |
| sp Q8N6M | OTUD6B  | sp Q8N6M | 1 | 3  | 3  | 3  | 17  | 33.812 | 117180000  | 163570000  | 87284000   | 177490000  | 172380000  | 116070000  |
| sp Q8N6R | METT13  | sp Q8N6R | 1 | 2  | 2  | 2  | 5.4 | 78.767 | 0          | 0          | 0          | 0          | 0          | 51654000   |
| sp Q8N6T | ARFGAP1 | sp Q8N6T | 1 | 8  | 8  | 8  | 31  | 44.667 | 686950000  | 649260000  | 631850000  | 736200000  | 803720000  | 662810000  |
| sp Q8N72 | CDKN2A  | sp Q8N72 | 1 | 4  | 4  | 4  | 39  | 13.903 | 2798800000 | 3856700000 | 2610200000 | 1900100000 | 2298200000 | 1740500000 |
| sp Q8N76 | EMC1    | sp Q8N76 | 1 | 9  | 9  | 9  | 13  | 111.76 | 600560000  | 520710000  | 632360000  | 704590000  | 621570000  | 671260000  |
| sp Q8N7H | PAF1    | sp Q8N7H | 1 | 11 | 11 | 11 | 24  | 59.975 | 497680000  | 411160000  | 357310000  | 521540000  | 597700000  | 450510000  |
| sp Q8N80 | UBR7    | sp Q8N80 | 1 | 5  | 5  | 5  | 16  | 47.998 | 162990000  | 209360000  | 130630000  | 139560000  | 142450000  | 153840000  |

|          |          |          |   |    |    |    |     |        |            |            |            |             |             |            |
|----------|----------|----------|---|----|----|----|-----|--------|------------|------------|------------|-------------|-------------|------------|
| sp Q8N8S | ENAH     | sp Q8N8S | 2 | 13 | 13 | 13 | 21  | 66.509 | 812010000  | 1081300000 | 923120000  | 855360000   | 877400000   | 978830000  |
| sp Q8N98 | MRPL43   | sp Q8N98 | 1 | 3  | 3  | 3  | 14  | 23.431 | 205980000  | 225790000  | 215030000  | 244850000   | 0           | 138650000  |
| sp Q8N99 | C12orf29 | sp Q8N99 | 1 | 3  | 3  | 3  | 15  | 37.49  | 818270000  | 539740000  | 522020000  | 956820000   | 540290000   | 448460000  |
| sp Q8N9A | CNEP1R1  | sp Q8N9A | 1 | 1  | 1  | 1  | 8.8 | 14.267 | 0          | 0          | 0          | 0           | 182710000   | 0          |
| sp Q8N9N | LRRC57   | sp Q8N9N | 1 | 2  | 2  | 2  | 8.4 | 26.754 | 0          | 0          | 0          | 85961000    | 0           | 117860000  |
| sp Q8N9C | SREK1IP  | sp Q8N9C | 1 | 1  | 1  | 1  | 7.7 | 18.177 | 0          | 0          | 0          | 0           | 0           | 52945000   |
| sp Q8N9T | KRI1     | sp Q8N9T | 1 | 4  | 4  | 4  | 7   | 82.597 | 0          | 0          | 0          | 0           | 85400000    | 0          |
| sp Q8NAV | PRPF38A  | sp Q8NAV | 1 | 5  | 5  | 5  | 21  | 37.476 | 398100000  | 0          | 0          | 0           | 383770000   | 0          |
| sp Q8NB1 | MLKL     | sp Q8NB1 | 1 | 5  | 5  | 5  | 18  | 54.478 | 225780000  | 200380000  | 163070000  | 179310000   | 195930000   | 189810000  |
| sp Q8NB3 | GATD1    | sp Q8NB3 | 1 | 1  | 1  | 1  | 4.5 | 23.297 | 0          | 0          | 0          | 0           | 18920000    | 0          |
| sp Q8NB4 | ATP11C   | sp Q8NB4 | 1 | 1  | 1  | 1  | 1.6 | 129.48 | 0          | 0          | 0          | 0           | 44041000    | 0          |
| sp Q8NB9 | SPATA5   | sp Q8NB9 | 1 | 8  | 7  | 7  | 13  | 97.903 | 324780000  | 252950000  | 309160000  | 400240000   | 294120000   | 295410000  |
| sp Q8NBF | NHLRC2   | sp Q8NBF | 1 | 4  | 4  | 4  | 14  | 79.443 | 89553000   | 110910000  | 96724000   | 91877000    | 86179000    | 65651000   |
| sp Q8NBI | XXYL1T1  | sp Q8NBI | 1 | 1  | 1  | 1  | 3.3 | 43.806 | 0          | 0          | 0          | 0           | 38172000    | 0          |
| sp Q8NBJ | GOLM1    | sp Q8NBJ | 1 | 5  | 5  | 5  | 17  | 45.333 | 199470000  | 244840000  | 280180000  | 194770000   | 0           | 287450000  |
| sp Q8NBJ | COLGALT  | sp Q8NBJ | 1 | 19 | 19 | 19 | 29  | 71.635 | 2704300000 | 2519800000 | 2523600000 | 2959800000  | 2929300000  | 2854400000 |
| sp Q8NBJ | SUMF2    | sp Q8NBJ | 1 | 4  | 4  | 4  | 17  | 33.843 | 325550000  | 462370000  | 396790000  | 317800000   | 442130000   | 279110000  |
| sp Q8NBK | SUMF1    | sp Q8NBK | 1 | 1  | 1  | 1  | 4   | 40.556 | 0          | 0          | 0          | 0           | 0           | 55050000   |
| sp Q8NBL | POGLUT1  | sp Q8NBL | 1 | 2  | 2  | 2  | 5.6 | 46.189 | 0          | 0          | 0          | 0           | 0           | 77358000   |
| sp Q8NBN | UBAC2    | sp Q8NBN | 1 | 1  | 1  | 1  | 5.2 | 38.963 | 0          | 0          | 0          | 0           | 0           | 0          |
| sp Q8NBN | TMEM87A  | sp Q8NBN | 1 | 3  | 3  | 3  | 7.9 | 63.429 | 0          | 0          | 0          | 307320000   | 0           | 0          |
| sp Q8NBN | RDH13    | sp Q8NBN | 1 | 3  | 3  | 3  | 15  | 35.932 | 110830000  | 92140000   | 0          | 128930000   | 120310000   | 77301000   |
| sp Q8NBC | HSD17B1  | sp Q8NBC | 1 | 3  | 3  | 3  | 14  | 32.935 | 174890000  | 186390000  | 232930000  | 202190000   | 212930000   | 241570000  |
| sp Q8NBS | TXNDC5   | sp Q8NBS | 1 | 18 | 18 | 18 | 47  | 47.628 | 6475000000 | 8025500000 | 8291000000 | 6820800000  | 8091000000  | 8851300000 |
| sp Q8NBT | SPC24    | sp Q8NBT | 1 | 6  | 6  | 6  | 59  | 22.478 | 420130000  | 476450000  | 431120000  | 473130000   | 314310000   | 220810000  |
| sp Q8NBU | ATAD1    | sp Q8NBU | 1 | 5  | 5  | 5  | 17  | 40.744 | 285640000  | 45994000   | 223130000  | 0           | 229250000   | 282110000  |
| sp Q8NBX | SCCPDH   | sp Q8NBX | 1 | 2  | 2  | 2  | 5.1 | 47.151 | 132120000  | 113210000  | 115860000  | 183240000   | 150540000   | 62786000   |
| sp Q8NC5 | SERBP1   | sp Q8NC5 | 1 | 20 | 20 | 20 | 51  | 44.965 | 2.5927E+10 | 2.5124E+10 | 2.493E+10  | 21056000000 | 24755000000 | 2.1848E+10 |
| sp Q8NC5 | LEMD2    | sp Q8NC5 | 1 | 4  | 4  | 4  | 15  | 56.974 | 154200000  | 0          | 139020000  | 154200000   | 175300000   | 166090000  |
| sp Q8NC6 | NOA1     | sp Q8NC6 | 1 | 1  | 1  | 1  | 2.3 | 78.457 | 0          | 0          | 0          | 0           | 19034000    | 0          |
| sp Q8NCA | FAM98A   | sp Q8NCA | 1 | 8  | 8  | 8  | 26  | 55.4   | 636230000  | 815660000  | 688810000  | 759460000   | 664090000   | 797360000  |
| sp Q8NCC | DAGLB    | sp Q8NCC | 1 | 6  | 6  | 6  | 13  | 73.731 | 0          | 94455000   | 0          | 90519000    | 53786000    | 100910000  |
| sp Q8NCN | PDPR     | sp Q8NCN | 1 | 4  | 4  | 4  | 6.7 | 99.363 | 78353000   | 51963000   | 94920000   | 71668000    | 0           | 57391000   |
| sp Q8NCU | C2CD4A   | sp Q8NCU | 2 | 2  | 2  | 2  | 5.1 | 39.743 | 646640000  | 472190000  | 510020000  | 0           | 0           | 0          |
| sp Q8NCV | NAXE     | sp Q8NCV | 1 | 7  | 7  | 7  | 37  | 31.674 | 514410000  | 621330000  | 678550000  | 576030000   | 724020000   | 765230000  |
| sp Q8ND2 | RNF214   | sp Q8ND2 | 1 | 1  | 1  | 1  | 2   | 77.667 | 0          | 0          | 0          | 0           | 0           | 11992000   |
| sp Q8ND5 | LSM14A   | sp Q8ND5 | 1 | 4  | 4  | 4  | 9.9 | 50.529 | 220460000  | 0          | 210700000  | 191880000   | 203480000   | 0          |
| sp Q8NDC | MAPK1IP  | sp Q8NDC | 1 | 1  | 1  | 1  | 6.9 | 24.269 | 0          | 0          | 0          | 0           | 0           | 181760000  |
| sp Q8NDX | PHC3     | sp Q8NDX | 2 | 3  | 3  | 3  | 6.4 | 106.16 | 0          | 0          | 0          | 48103000    | 0           | 0          |



|          |          |          |   |    |    |    |     |        |            |            |            |            |            |            |
|----------|----------|----------|---|----|----|----|-----|--------|------------|------------|------------|------------|------------|------------|
| sp Q8NDX | ZNF740   | sp Q8NDX | 1 | 1  | 1  | 1  | 12  | 21.857 | 0          | 0          | 0          | 0          | 20011000   | 0          |
| sp Q8NE0 | CNNM3    | sp Q8NE0 | 1 | 2  | 2  | 2  | 3.8 | 76.118 | 0          | 418920000  | 0          | 0          | 0          | 0          |
| sp Q8NE7 | ABCF1    | sp Q8NE7 | 1 | 20 | 20 | 20 | 31  | 95.925 | 2503500000 | 1966900000 | 2416800000 | 2239800000 | 2856700000 | 2518800000 |
| sp Q8NE8 | MCU      | sp Q8NE8 | 1 | 2  | 2  | 2  | 8   | 39.866 | 0          | 0          | 0          | 0          | 0          | 166750000  |
| sp Q8NEE | PIK3C3   | sp Q8NEE | 1 | 3  | 3  | 3  | 5.2 | 101.55 | 0          | 50741000   | 0          | 41139000   | 0          | 34626000   |
| sp Q8NEJ | NGDN     | sp Q8NEJ | 1 | 4  | 4  | 4  | 18  | 35.894 | 221170000  | 155580000  | 0          | 247280000  | 263620000  | 0          |
| sp Q8NEN | SHCBP1   | sp Q8NEN | 1 | 6  | 6  | 6  | 9.2 | 75.69  | 0          | 113660000  | 0          | 0          | 0          | 0          |
| sp Q8NEV | SLC30A7  | sp Q8NEV | 1 | 1  | 1  | 1  | 4   | 41.625 | 0          | 0          | 0          | 0          | 0          | 266720000  |
| sp Q8NEX | WFDC11   | sp Q8NEX | 1 | 1  | 1  | 1  | 12  | 10.34  | 0          | 0          | 0          | 0          | 0          | 257620000  |
| sp Q8NEY | NAV1     | sp Q8NEY | 1 | 2  | 2  | 2  | 1.7 | 202.47 | 0          | 0          | 0          | 0          | 50189000   | 53571000   |
| sp Q8NEY | PPHLN1   | sp Q8NEY | 1 | 3  | 3  | 3  | 7.4 | 52.736 | 0          | 0          | 0          | 0          | 0          | 79578000   |
| sp Q8NEZ | VPS37A   | sp Q8NEZ | 1 | 2  | 2  | 2  | 8.3 | 44.314 | 0          | 0          | 0          | 0          | 83733000   | 0          |
| sp Q8NEZ | FBXO22   | sp Q8NEZ | 1 | 4  | 4  | 4  | 12  | 44.508 | 239440000  | 205270000  | 152740000  | 326720000  | 311620000  | 318710000  |
| sp Q8NF3 | LPCAT1   | sp Q8NF3 | 1 | 12 | 12 | 12 | 27  | 59.151 | 1789900000 | 1900800000 | 1502600000 | 1814700000 | 1782300000 | 1916200000 |
| sp Q8NF6 | ZMIZ2    | sp Q8NF6 | 1 | 2  | 2  | 2  | 4.9 | 96.536 | 0          | 0          | 39550000   | 45655000   | 0          | 0          |
| sp Q8NF9 | SYNE1    | sp Q8NF9 | 1 | 4  | 4  | 4  | 0.6 | 1011.1 | 1606100000 | 2247800000 | 1500000000 | 2164000000 | 2091200000 | 0          |
| sp Q8NFC | BOD1L1   | sp Q8NFC | 2 | 3  | 3  | 3  | 1.5 | 330.46 | 162500000  | 65247000   | 0          | 0          | 0          | 47436000   |
| sp Q8NFD | ARID1B   | sp Q8NFD | 1 | 5  | 4  | 4  | 4.6 | 236.12 | 0          | 51259000   | 0          | 0          | 0          | 33802000   |
| sp Q8NFF | FLAD1    | sp Q8NFF | 1 | 3  | 3  | 3  | 9.7 | 65.265 | 138210000  | 147500000  | 91882000   | 169550000  | 178630000  | 216970000  |
| sp Q8NFH | NUP43    | sp Q8NFH | 1 | 5  | 5  | 5  | 19  | 42.15  | 424920000  | 332520000  | 442920000  | 390800000  | 457880000  | 453480000  |
| sp Q8NFH | NUP37    | sp Q8NFH | 1 | 8  | 8  | 8  | 31  | 36.707 | 693440000  | 554000000  | 786940000  | 510020000  | 671330000  | 576700000  |
| sp Q8NFH | NUP35    | sp Q8NFH | 1 | 5  | 5  | 5  | 25  | 34.773 | 453160000  | 549240000  | 759420000  | 832570000  | 804370000  | 676170000  |
| sp Q8NFJ | GPRC5A   | sp Q8NFJ | 1 | 5  | 5  | 5  | 24  | 40.251 | 1287300000 | 1381500000 | 1213500000 | 971460000  | 1235100000 | 1102500000 |
| sp Q8NFC | TOR1AIP2 | sp Q8NFC | 1 | 7  | 6  | 6  | 21  | 51.263 | 242610000  | 346960000  | 0          | 277960000  | 331310000  | 408660000  |
| sp Q8NFI | IPMK     | sp Q8NFI | 1 | 1  | 1  | 1  | 2.2 | 47.221 | 0          | 0          | 0          | 0          | 0          | 123220000  |
| sp Q8NFV | ABHD11   | sp Q8NFV | 1 | 3  | 3  | 3  | 9.2 | 34.69  | 0          | 56161000   | 0          | 192240000  | 51144000   | 0          |
| sp Q8NFV | CMAS     | sp Q8NFV | 1 | 2  | 2  | 2  | 5.5 | 48.379 | 0          | 0          | 0          | 0          | 151420000  | 0          |
| sp Q8NHH | ATL2     | sp Q8NHH | 1 | 5  | 5  | 5  | 12  | 66.228 | 0          | 99708000   | 117440000  | 123790000  | 145880000  | 164130000  |
| sp Q8NHC | DDX55    | sp Q8NHC | 1 | 2  | 2  | 2  | 7   | 68.546 | 0          | 112890000  | 108940000  | 64343000   | 0          | 94511000   |
| sp Q8NI2 | MCFD2    | sp Q8NI2 | 1 | 1  | 1  | 1  | 12  | 16.39  | 0          | 0          | 0          | 0          | 0          | 79103000   |
| sp Q8NI2 | THOC2    | sp Q8NI2 | 1 | 9  | 9  | 9  | 7.2 | 182.77 | 329850000  | 345520000  | 335510000  | 340560000  | 411850000  | 259410000  |
| sp Q8NI3 | WDR36    | sp Q8NI3 | 1 | 13 | 13 | 13 | 18  | 105.32 | 483590000  | 405720000  | 709930000  | 630340000  | 556050000  | 521830000  |
| sp Q8NI6 | COQ8A    | sp Q8NI6 | 1 | 1  | 1  | 1  | 1.9 | 71.949 | 0          | 0          | 0          | 0          | 0          | 7095000    |
| sp Q8TAA | VANGL1   | sp Q8TAA | 1 | 2  | 2  | 2  | 9   | 59.974 | 126460000  | 0          | 0          | 0          | 97739000   | 0          |
| sp Q8TAD | SLC30A5  | sp Q8TAD | 1 | 1  | 1  | 1  | 3.1 | 84.046 | 0          | 63483000   | 0          | 0          | 0          | 0          |
| sp Q8TAE | GADD45C  | sp Q8TAE | 1 | 5  | 5  | 5  | 28  | 25.384 | 252980000  | 238180000  | 0          | 0          | 208650000  | 248670000  |
| sp Q8TAF | WDR48    | sp Q8TAF | 1 | 3  | 3  | 3  | 8.3 | 76.21  | 0          | 82604000   | 0          | 0          | 73646000   | 0          |
| sp Q8TAG | EXOC6    | sp Q8TAG | 1 | 2  | 2  | 2  | 5.1 | 93.721 | 0          | 0          | 48281000   | 0          | 33330000   | 0          |
| sp Q8TAP | MPLKIP   | sp Q8TAP | 1 | 1  | 1  | 1  | 14  | 19.147 | 0          | 0          | 0          | 0          | 34206000   | 0          |

|                  |          |   |    |    |    |     |        |            |            |            |            |            |            |
|------------------|----------|---|----|----|----|-----|--------|------------|------------|------------|------------|------------|------------|
| sp Q8TAC SMARCC  | sp Q8TAC | 1 | 12 | 6  | 6  | 14  | 132.88 | 272960000  | 287730000  | 254270000  | 306390000  | 260150000  | 243020000  |
| sp Q8TAT NPLOC4  | sp Q8TAT | 1 | 15 | 15 | 15 | 42  | 68.119 | 1143300000 | 1110400000 | 1169800000 | 1228400000 | 1087400000 | 1227400000 |
| sp Q8TB3 NUBPL   | sp Q8TB3 | 1 | 1  | 1  | 1  | 6.3 | 34.082 | 0          | 0          | 0          | 0          | 0          | 20691000   |
| sp Q8TB6 SLC35B2 | sp Q8TB6 | 1 | 2  | 2  | 2  | 4.9 | 47.514 | 0          | 200430000  | 164490000  | 190760000  | 0          | 202890000  |
| sp Q8TBB KLHDC4  | sp Q8TBB | 1 | 1  | 1  | 1  | 3.1 | 57.891 | 0          | 0          | 52294000   | 0          | 0          | 0          |
| sp Q8TBC UBA3    | sp Q8TBC | 1 | 12 | 12 | 12 | 43  | 51.852 | 533750000  | 493360000  | 507020000  | 456540000  | 532150000  | 546810000  |
| sp Q8TBC TMEM167 | sp Q8TBC | 1 | 1  | 1  | 1  | 13  | 8.0598 | 0          | 0          | 0          | 0          | 0          | 302620000  |
| sp Q8TBX PIP4K2C | sp Q8TBX | 1 | 1  | 1  | 1  | 5.5 | 47.299 | 0          | 0          | 0          | 0          | 0          | 72501000   |
| sp Q8TC0 TBC1D15 | sp Q8TC0 | 1 | 7  | 7  | 7  | 11  | 79.49  | 0          | 317060000  | 0          | 0          | 0          | 0          |
| sp Q8TC1 RDH11   | sp Q8TC1 | 1 | 6  | 6  | 6  | 26  | 35.386 | 793020000  | 372070000  | 556080000  | 723160000  | 820060000  | 956420000  |
| sp Q8TCE IFI44   | sp Q8TCE | 1 | 1  | 1  | 1  | 2.7 | 50.49  | 0          | 0          | 0          | 0          | 0          | 0          |
| sp Q8TCD NT5C    | sp Q8TCD | 1 | 3  | 3  | 3  | 25  | 23.382 | 0          | 0          | 0          | 0          | 89475000   | 0          |
| sp Q8TCF ZFAND1  | sp Q8TCF | 1 | 1  | 1  | 1  | 5.6 | 30.787 | 0          | 0          | 0          | 0          | 0          | 27171000   |
| sp Q8TCJ STT3B   | sp Q8TCJ | 1 | 11 | 11 | 11 | 15  | 93.673 | 1422200000 | 1492100000 | 1444800000 | 1514200000 | 1262300000 | 1273100000 |
| sp Q8TCS PNPT1   | sp Q8TCS | 1 | 20 | 20 | 20 | 33  | 85.95  | 1477700000 | 1731500000 | 1272400000 | 1527400000 | 1495900000 | 1484200000 |
| sp Q8CTI HM13    | sp Q8CTI | 1 | 7  | 7  | 7  | 21  | 41.488 | 1095900000 | 991930000  | 711030000  | 1217800000 | 1144000000 | 1100300000 |
| sp Q8TD0 MAPK15  | sp Q8TD0 | 1 | 1  | 1  | 1  | 1.5 | 59.831 | 0          | 0          | 0          | 0          | 0          | 224750000  |
| sp Q8TD1 BICD2   | sp Q8TD1 | 1 | 4  | 4  | 4  | 6.7 | 93.532 | 0          | 0          | 0          | 0          | 0          | 90351000   |
| sp Q8TD3 GPT2    | sp Q8TD3 | 1 | 2  | 2  | 2  | 5.9 | 57.903 | 0          | 0          | 0          | 0          | 533980000  | 0          |
| sp Q8TDB DTX3L   | sp Q8TDB | 1 | 1  | 1  | 1  | 2   | 83.553 | 0          | 0          | 0          | 0          | 0          | 16160000   |
| sp Q8TDD DDX54   | sp Q8TDD | 1 | 5  | 5  | 5  | 7.6 | 98.594 | 0          | 89306000   | 0          | 74391000   | 49091000   | 0          |
| sp Q8TDN BRIX1   | sp Q8TDN | 1 | 12 | 12 | 12 | 43  | 41.401 | 2478500000 | 3354400000 | 2122400000 | 3187100000 | 2385500000 | 2967500000 |
| sp Q8TDF RNASEH2 | sp Q8TDF | 1 | 2  | 2  | 2  | 24  | 17.84  | 104570000  | 103210000  | 0          | 76020000   | 93270000   | 94272000   |
| sp Q8TDC GNPDA2  | sp Q8TDC | 1 | 6  | 3  | 3  | 36  | 31.084 | 125620000  | 191790000  | 0          | 0          | 0          | 181610000  |
| sp Q8TDX NEK7    | sp Q8TDX | 1 | 10 | 10 | 9  | 38  | 34.551 | 828200000  | 741850000  | 769590000  | 907890000  | 863410000  | 650720000  |
| sp Q8TED UTP15   | sp Q8TED | 1 | 9  | 9  | 9  | 28  | 58.414 | 396240000  | 350550000  | 448730000  | 393730000  | 401030000  | 373520000  |
| sp Q8TED GPX8    | sp Q8TED | 1 | 6  | 6  | 6  | 33  | 23.881 | 718760000  | 528450000  | 601460000  | 626470000  | 553630000  | 719710000  |
| sp Q8TEM NUP210  | sp Q8TEM | 1 | 15 | 15 | 15 | 14  | 205.11 | 877230000  | 724310000  | 1002800000 | 1055500000 | 913440000  | 1046300000 |
| sp Q8TEG GEMIN5  | sp Q8TEG | 1 | 25 | 25 | 25 | 23  | 168.59 | 1387400000 | 1548100000 | 1338400000 | 1232100000 | 1421100000 | 1331000000 |
| sp Q9Y4G RAPGEF2 | sp Q9Y4G | 2 | 1  | 1  | 1  | 0.9 | 167.41 | 0          | 0          | 0          | 0          | 0          | 30393000   |
| sp Q8TEX IPO4    | sp Q8TEX | 1 | 21 | 21 | 21 | 26  | 118.71 | 1205700000 | 1316000000 | 1269300000 | 1234800000 | 1493000000 | 1213200000 |
| sp Q8TF6 ZNF384  | sp Q8TF6 | 1 | 3  | 3  | 3  | 12  | 63.218 | 0          | 74171000   | 0          | 0          | 0          | 0          |
| sp Q8WTS ABHD5   | sp Q8WTS | 1 | 1  | 1  | 1  | 5.7 | 39.095 | 0          | 0          | 0          | 0          | 10188000   | 0          |
| sp Q8WTS SETD7   | sp Q8WTS | 1 | 4  | 4  | 4  | 14  | 40.72  | 206790000  | 0          | 217050000  | 0          | 258460000  | 148930000  |
| sp Q8WTI NOC3L   | sp Q8WTI | 1 | 8  | 8  | 8  | 13  | 92.547 | 326470000  | 420660000  | 504090000  | 372560000  | 300920000  | 252740000  |
| sp Q8WTV SCARB1  | sp Q8WTV | 1 | 4  | 4  | 4  | 7.6 | 60.877 | 310430000  | 278200000  | 396040000  | 321500000  | 0          | 502900000  |
| sp Q8WTV COG1    | sp Q8WTV | 1 | 3  | 3  | 3  | 6   | 108.98 | 0          | 0          | 0          | 22939000   | 21218000   | 0          |
| sp Q8WU PYROXD   | sp Q8WU  | 1 | 2  | 2  | 2  | 10  | 55.792 | 0          | 0          | 0          | 0          | 0          | 21796000   |
| sp Q8WU SMAP2    | sp Q8WU  | 1 | 2  | 2  | 2  | 6.5 | 46.785 | 0          | 0          | 0          | 0          | 30062000   | 0          |

|                 |         |   |    |    |    |     |        |            |            |            |            |            |            |
|-----------------|---------|---|----|----|----|-----|--------|------------|------------|------------|------------|------------|------------|
| sp Q8WU ZC3H15  | sp Q8WU | 1 | 14 | 14 | 14 | 37  | 48.602 | 1429400000 | 1513500000 | 1400700000 | 1335400000 | 1451100000 | 1400400000 |
| sp Q8WU PPIL4   | sp Q8WU | 1 | 2  | 2  | 2  | 6.3 | 57.224 | 0          | 0          | 0          | 131440000  | 0          | 0          |
| sp Q8WU PHF10   | sp Q8WU | 1 | 1  | 1  | 1  | 3.6 | 56.05  | 0          | 0          | 0          | 0          | 34048000   | 0          |
| sp Q8WU PPP1R13 | sp Q8WU | 1 | 8  | 8  | 8  | 16  | 89.09  | 351390000  | 475670000  | 420530000  | 276240000  | 374130000  | 407690000  |
| sp Q8WU TMEM263 | sp Q8WU | 1 | 1  | 1  | 1  | 13  | 11.748 | 0          | 0          | 0          | 0          | 0          | 60642000   |
| sp Q8WU PTPMT1  | sp Q8WU | 1 | 3  | 3  | 3  | 21  | 22.843 | 60024000   | 0          | 52603000   | 68726000   | 47338000   | 0          |
| sp Q8WU NUP133  | sp Q8WU | 1 | 20 | 20 | 20 | 25  | 128.98 | 998440000  | 1199700000 | 986980000  | 1040900000 | 1032400000 | 1039500000 |
| sp Q8WU PDCD6IP | sp Q8WU | 1 | 39 | 39 | 39 | 57  | 96.022 | 8288000000 | 8366800000 | 8068500000 | 7357800000 | 7657000000 | 8386700000 |
| sp Q8WU SLC38A5 | sp Q8WU | 1 | 5  | 5  | 5  | 12  | 51.457 | 299760000  | 278880000  | 186740000  | 0          | 0          | 0          |
| sp Q8WU CHAC2   | sp Q8WU | 1 | 2  | 2  | 2  | 19  | 20.874 | 0          | 0          | 165560000  | 0          | 0          | 0          |
| sp Q8WU CHMP7   | sp Q8WU | 1 | 2  | 2  | 2  | 7.5 | 50.91  | 112040000  | 165580000  | 88023000   | 122400000  | 123550000  | 134160000  |
| sp Q8WU THEM6   | sp Q8WU | 1 | 4  | 4  | 4  | 28  | 23.865 | 0          | 66467000   | 0          | 0          | 0          | 0          |
| sp Q8WU NAT14   | sp Q8WU | 1 | 1  | 1  | 1  | 11  | 21.65  | 0          | 0          | 0          | 0          | 0          | 22813000   |
| sp Q8WV NSMCE1  | sp Q8WV | 1 | 1  | 1  | 1  | 5.3 | 30.855 | 0          | 0          | 0          | 0          | 0          | 15702000   |
| sp Q8WV LEO1    | sp Q8WV | 1 | 2  | 2  | 2  | 2.6 | 75.403 | 81446000   | 42351000   | 0          | 126710000  | 81449000   | 85631000   |
| sp Q8WV SMIM4   | sp Q8WV | 1 | 1  | 1  | 1  | 16  | 8.6961 | 0          | 0          | 0          | 0          | 51969000   | 0          |
| sp Q8WV NUDCD2  | sp Q8WV | 1 | 4  | 4  | 4  | 46  | 17.676 | 185330000  | 222610000  | 212480000  | 224590000  | 251870000  | 254280000  |
| sp Q8WV TFB1M   | sp Q8WV | 1 | 2  | 2  | 2  | 10  | 39.542 | 92926000   | 120470000  | 73153000   | 0          | 0          | 81398000   |
| sp Q8WV SCFD1   | sp Q8WV | 1 | 11 | 11 | 11 | 23  | 72.379 | 603080000  | 679350000  | 729450000  | 581150000  | 679110000  | 628990000  |
| sp Q8WV CANT1   | sp Q8WV | 1 | 1  | 1  | 1  | 4.5 | 44.839 | 0          | 0          | 0          | 0          | 0          | 40731000   |
| sp Q8WV HNRNPLL | sp Q8WV | 1 | 12 | 11 | 11 | 32  | 60.082 | 581460000  | 490400000  | 454700000  | 587500000  | 647790000  | 551450000  |
| sp Q8WV FAR1    | sp Q8WV | 1 | 3  | 3  | 3  | 7.4 | 59.356 | 0          | 0          | 0          | 0          | 0          | 167640000  |
| sp Q8WV UBLCP1  | sp Q8WV | 1 | 3  | 3  | 3  | 8.5 | 36.804 | 239960000  | 288500000  | 264490000  | 203160000  | 170120000  | 308680000  |
| sp Q8WW TSEN15  | sp Q8WW | 1 | 2  | 2  | 2  | 20  | 18.641 | 76423000   | 84037000   | 107890000  | 0          | 102360000  | 95562000   |
| sp Q8WW PCNP    | sp Q8WW | 1 | 5  | 5  | 5  | 36  | 18.925 | 1039900000 | 863080000  | 1290600000 | 1149200000 | 1389500000 | 1675600000 |
| sp Q8WW DNAJA4  | sp Q8WW | 1 | 2  | 2  | 2  | 4.8 | 44.797 | 0          | 0          | 0          | 403430000  | 0          | 0          |
| sp Q8WW SPRYD4  | sp Q8WW | 1 | 4  | 4  | 4  | 32  | 23.128 | 122160000  | 159770000  | 0          | 0          | 241540000  | 0          |
| sp Q8WW GLMP    | sp Q8WW | 1 | 1  | 1  | 1  | 6.4 | 43.864 | 0          | 0          | 0          | 0          | 0          | 50387000   |
| sp Q8WW MAIP1   | sp Q8WW | 1 | 3  | 3  | 3  | 11  | 32.544 | 245090000  | 240610000  | 251620000  | 214030000  | 210280000  | 232360000  |
| sp Q8WW LMO7    | sp Q8WW | 1 | 28 | 28 | 28 | 22  | 192.69 | 2662800000 | 2595900000 | 2392100000 | 1883900000 | 2319500000 | 2175700000 |
| sp Q8WW SLC44A1 | sp Q8WW | 1 | 2  | 2  | 2  | 4.4 | 73.301 | 0          | 48661000   | 66073000   | 0          | 0          | 0          |
| sp Q8WW CKAP2   | sp Q8WW | 1 | 3  | 3  | 3  | 5.6 | 76.986 | 121880000  | 112200000  | 61795000   | 126390000  | 128170000  | 133330000  |
| sp Q8WW ATXN2L  | sp Q8WW | 1 | 22 | 22 | 22 | 31  | 113.37 | 1798100000 | 1831200000 | 1993700000 | 2073600000 | 2007900000 | 2105600000 |
| sp Q8WW PHIP    | sp Q8WW | 1 | 4  | 4  | 4  | 4.3 | 206.69 | 74860000   | 0          | 0          | 0          | 0          | 0          |
| sp Q8WW PRPF31  | sp Q8WW | 1 | 8  | 8  | 8  | 28  | 55.455 | 503250000  | 487930000  | 554230000  | 411400000  | 376200000  | 532690000  |
| sp Q8WX NELFB   | sp Q8WX | 1 | 8  | 8  | 8  | 20  | 65.697 | 275750000  | 310680000  | 354620000  | 378500000  | 375100000  | 328790000  |
| sp Q8WX PALLD   | sp Q8WX | 2 | 28 | 28 | 28 | 30  | 150.56 | 3972700000 | 3770000000 | 3513700000 | 3202200000 | 3558100000 | 3562800000 |
| sp Q8WX METTL21 | sp Q8WX | 1 | 1  | 1  | 1  | 6.9 | 24.6   | 0          | 0          | 0          | 5872200    | 0          | 0          |
| sp Q8WX ATRIP   | sp Q8WX | 1 | 1  | 1  | 1  | 1.4 | 85.837 | 0          | 0          | 0          | 0          | 0          | 167530000  |

|                  |           |   |    |    |    |     |        |            |            |            |             |             |            |
|------------------|-----------|---|----|----|----|-----|--------|------------|------------|------------|-------------|-------------|------------|
| sp Q8WX1 STON2   | sp Q8WX1  | 1 | 1  | 1  | 1  | 1   | 101.16 | 0          | 0          | 0          | 0           | 0           | 82981000   |
| sp Q8WX1 PSPC1   | sp Q8WX1  | 1 | 10 | 9  | 9  | 23  | 58.743 | 648990000  | 709740000  | 665200000  | 720640000   | 805100000   | 763490000  |
| sp Q8WX1 GATAD2E | sp Q8WX1  | 1 | 12 | 12 | 10 | 28  | 65.26  | 755580000  | 652890000  | 641290000  | 549890000   | 591720000   | 749680000  |
| sp Q8WX2 DNAJC9  | sp Q8WX2  | 1 | 11 | 11 | 11 | 49  | 29.909 | 862190000  | 737730000  | 953640000  | 895370000   | 917720000   | 986820000  |
| sp Q8WY2 BRI3BP  | sp Q8WY2  | 1 | 2  | 2  | 2  | 14  | 27.835 | 250170000  | 245640000  | 216130000  | 224050000   | 180560000   | 332540000  |
| sp Q8WY7 CTNNBL1 | sp Q8WY7  | 1 | 5  | 5  | 5  | 9.1 | 65.173 | 166220000  | 214370000  | 192200000  | 148410000   | 169400000   | 169930000  |
| sp Q8WY7 AHCTF1  | sp Q8WY7  | 1 | 16 | 16 | 16 | 11  | 252.5  | 640190000  | 654620000  | 631480000  | 529500000   | 578170000   | 920210000  |
| sp Q8WY0 ZCCHC14 | sp Q8WY0  | 1 | 1  | 1  | 1  | 0.9 | 100.04 | 0          | 58622000   | 0          | 0           | 0           | 0          |
| sp Q8WZ8 OVCA2   | sp Q8WZ8  | 1 | 4  | 4  | 4  | 23  | 24.418 | 168100000  | 136310000  | 160000000  | 126510000   | 116430000   | 109910000  |
| sp Q8WZ7 LZIC    | sp Q8WZ7  | 1 | 5  | 5  | 5  | 37  | 21.494 | 292950000  | 310470000  | 286960000  | 310210000   | 335550000   | 155740000  |
| sp Q9246 DDB2    | sp Q9246  | 1 | 8  | 8  | 8  | 24  | 47.863 | 396190000  | 396760000  | 593490000  | 343750000   | 332320000   | 362510000  |
| sp Q9249 DDX1    | sp Q9249  | 1 | 31 | 31 | 31 | 49  | 82.431 | 5851100000 | 5893000000 | 5393500000 | 5559700000  | 5427500000  | 5114700000 |
| sp Q9250 SLC39A7 | sp Q9250  | 1 | 2  | 2  | 2  | 3   | 50.117 | 0          | 0          | 85205000   | 0           | 0           | 0          |
| sp Q9250 HSD17B8 | sp Q9250  | 1 | 1  | 1  | 1  | 5   | 26.973 | 0          | 0          | 0          | 0           | 0           | 30998000   |
| sp Q9252 FAM3C   | sp Q9252  | 1 | 2  | 2  | 2  | 12  | 24.68  | 249690000  | 184910000  | 0          | 0           | 0           | 0          |
| sp Q9252 H1FX    | sp Q9252  | 1 | 5  | 5  | 5  | 31  | 22.487 | 983670000  | 930920000  | 869160000  | 1069800000  | 1178400000  | 1334400000 |
| sp Q9253 PSMF1   | sp Q9253  | 1 | 2  | 2  | 2  | 12  | 29.816 | 176300000  | 236340000  | 173580000  | 183090000   | 228230000   | 202520000  |
| sp Q9253 SLC7A6  | sp Q9253  | 1 | 3  | 2  | 2  | 11  | 56.827 | 0          | 0          | 0          | 0           | 0           | 471530000  |
| sp Q9253 GBF1    | sp Q9253  | 1 | 16 | 16 | 16 | 12  | 206.44 | 694540000  | 669040000  | 650650000  | 616850000   | 715910000   | 636740000  |
| sp Q9254 RTF1    | sp Q9254  | 1 | 7  | 7  | 7  | 11  | 80.313 | 0          | 0          | 0          | 224910000   | 0           | 0          |
| sp Q9254 NCSTN   | sp Q9254  | 1 | 4  | 4  | 4  | 6.1 | 78.41  | 267580000  | 264520000  | 275540000  | 256240000   | 307100000   | 237590000  |
| sp Q9254 TM9SF4  | sp Q9254  | 1 | 7  | 7  | 7  | 18  | 74.518 | 472030000  | 456960000  | 369310000  | 438130000   | 334690000   | 427370000  |
| sp Q9255 MRPS27  | sp Q9255  | 1 | 8  | 8  | 8  | 22  | 47.611 | 555750000  | 610190000  | 462080000  | 398640000   | 476920000   | 458700000  |
| sp Q9257 AP3S1   | sp Q9257  | 1 | 4  | 4  | 4  | 28  | 21.732 | 226770000  | 122920000  | 259070000  | 202010000   | 281690000   | 222720000  |
| sp Q9257 TSC1    | sp Q9257  | 1 | 1  | 1  | 1  | 1.4 | 129.77 | 0          | 0          | 0          | 0           | 0           | 17428000   |
| sp Q9257 UBXN4   | sp Q9257  | 1 | 3  | 3  | 3  | 14  | 56.777 | 280610000  | 250650000  | 217070000  | 297320000   | 288960000   | 312080000  |
| sp Q9259 NDRG1   | sp Q9259  | 1 | 4  | 4  | 4  | 20  | 42.835 | 332460000  | 198060000  | 262980000  | 318920000   | 329600000   | 253670000  |
| sp Q9259 HSPH1   | sp Q9259  | 1 | 40 | 39 | 37 | 57  | 96.864 | 9558800000 | 1.0267E+10 | 9690700000 | 10504000000 | 10207000000 | 1.1486E+10 |
| sp Q9260 CNOT9   | sp Q9260  | 1 | 6  | 6  | 6  | 25  | 33.631 | 409260000  | 327120000  | 455840000  | 246190000   | 0           | 0          |
| sp Q9260 LPGAT1  | sp Q9260  | 1 | 3  | 3  | 3  | 12  | 43.089 | 0          | 0          | 0          | 0           | 0           | 109010000  |
| sp Q92614 MYO18A | sp Q92614 | 1 | 2  | 2  | 2  | 1.2 | 233.11 | 0          | 0          | 0          | 0           | 0           | 36100000   |
| sp Q92613 LARP4B | sp Q92613 | 1 | 9  | 9  | 9  | 18  | 80.551 | 320630000  | 464830000  | 476660000  | 582190000   | 442560000   | 282460000  |
| sp Q92616 GCN1   | sp Q92616 | 1 | 72 | 72 | 72 | 34  | 292.75 | 5023100000 | 4793700000 | 4675600000 | 4747600000  | 4494400000  | 4731600000 |
| sp Q92620 DHX38  | sp Q92620 | 1 | 8  | 8  | 8  | 9.1 | 140.5  | 230250000  | 248960000  | 250190000  | 176340000   | 305130000   | 252740000  |
| sp Q92620 NUP205 | sp Q92620 | 1 | 26 | 26 | 26 | 16  | 227.92 | 1502100000 | 1585200000 | 1503100000 | 1712800000  | 1668600000  | 1592300000 |
| sp Q92620 PXDN   | sp Q92620 | 1 | 5  | 5  | 5  | 5.9 | 165.27 | 192430000  | 185110000  | 208160000  | 228710000   | 215640000   | 212910000  |
| sp Q92643 PIGK   | sp Q92643 | 1 | 3  | 3  | 3  | 12  | 45.251 | 103400000  | 0          | 118970000  | 184520000   | 89609000    | 47764000   |
| sp Q92663 MRPS31 | sp Q92663 | 1 | 7  | 7  | 7  | 26  | 45.318 | 318130000  | 280120000  | 319290000  | 303420000   | 419420000   | 412920000  |
| sp Q92663 AKAP1  | sp Q92663 | 1 | 4  | 4  | 4  | 7.1 | 97.34  | 145760000  | 122570000  | 100220000  | 122440000   | 135700000   | 129410000  |

|                  |          |   |    |    |    |     |        |            |            |            |            |            |            |
|------------------|----------|---|----|----|----|-----|--------|------------|------------|------------|------------|------------|------------|
| sp Q9268 ALG3    | sp Q9268 | 1 | 1  | 1  | 1  | 2.3 | 50.126 | 0          | 0          | 0          | 0          | 0          | 48592000   |
| sp Q9268 ANP32B  | sp Q9268 | 1 | 9  | 7  | 7  | 32  | 28.787 | 2287200000 | 3357700000 | 2691300000 | 2683500000 | 3018000000 | 2667000000 |
| sp Q9269 NECTIN2 | sp Q9269 | 1 | 1  | 1  | 1  | 3.5 | 57.741 | 0          | 0          | 0          | 0          | 0          | 31372000   |
| sp Q9269 RABGGT  | sp Q9269 | 1 | 7  | 7  | 7  | 15  | 65.071 | 201400000  | 163140000  | 162070000  | 219440000  | 272480000  | 221480000  |
| sp Q9273 PRCC    | sp Q9273 | 1 | 5  | 5  | 5  | 15  | 52.417 | 0          | 137070000  | 204390000  | 127510000  | 176530000  | 144090000  |
| sp Q9273 TFG     | sp Q9273 | 1 | 10 | 10 | 10 | 35  | 43.447 | 1913300000 | 1631100000 | 1705800000 | 1367300000 | 1349100000 | 1404400000 |
| sp Q9274 ARPC1A  | sp Q9274 | 1 | 10 | 9  | 9  | 39  | 41.569 | 1014000000 | 1041800000 | 866990000  | 917080000  | 942850000  | 1085700000 |
| sp Q9275 GTF2H4  | sp Q9275 | 1 | 1  | 1  | 1  | 2.8 | 52.186 | 0          | 0          | 0          | 0          | 0          | 66459000   |
| sp Q9276 HDAC2   | sp Q9276 | 1 | 10 | 10 | 7  | 30  | 55.364 | 2661400000 | 2928800000 | 3173200000 | 2296600000 | 2584200000 | 2654300000 |
| sp Q9278 STAM    | sp Q9278 | 1 | 3  | 3  | 3  | 8.7 | 59.179 | 0          | 90835000   | 146640000  | 0          | 0          | 0          |
| sp Q9278 DPF2    | sp Q9278 | 1 | 5  | 5  | 5  | 16  | 44.155 | 258970000  | 243940000  | 325010000  | 193920000  | 211120000  | 227940000  |
| sp Q9279 P3H4    | sp Q9279 | 1 | 3  | 3  | 3  | 9.2 | 50.381 | 0          | 104120000  | 136650000  | 0          | 71859000   | 0          |
| sp Q9279 CREBBP  | sp Q9279 | 2 | 4  | 4  | 4  | 2.8 | 265.35 | 126640000  | 0          | 0          | 165530000  | 239900000  | 139330000  |
| sp Q9279 SYMPK   | sp Q9279 | 1 | 8  | 8  | 8  | 12  | 141.15 | 279250000  | 357250000  | 339930000  | 331540000  | 388670000  | 318030000  |
| sp Q9280 TAF15   | sp Q9280 | 1 | 7  | 5  | 5  | 21  | 61.829 | 834050000  | 1079100000 | 1023200000 | 783060000  | 879440000  | 755430000  |
| sp Q9282 GGH     | sp Q9282 | 1 | 2  | 2  | 2  | 8.2 | 35.964 | 65319000   | 84785000   | 70487000   | 83718000   | 79004000   | 94415000   |
| sp Q9284 DDX17   | sp Q9284 | 1 | 26 | 17 | 17 | 41  | 80.272 | 5089700000 | 6012900000 | 5593700000 | 5124800000 | 4899300000 | 4752000000 |
| sp Q9287 RAD50   | sp Q9287 | 1 | 24 | 24 | 24 | 23  | 153.89 | 1113200000 | 1214700000 | 1028000000 | 1242600000 | 1305900000 | 1352800000 |
| sp Q9287 CELF1   | sp Q9287 | 2 | 7  | 7  | 7  | 15  | 52.063 | 728710000  | 792790000  | 555290000  | 588130000  | 833790000  | 789090000  |
| sp Q9288 OSTF1   | sp Q9288 | 1 | 4  | 4  | 4  | 24  | 23.787 | 0          | 0          | 0          | 0          | 0          | 206570000  |
| sp Q9288 ARHGEF  | sp Q9288 | 1 | 3  | 3  | 3  | 4.4 | 102.43 | 0          | 148190000  | 142740000  | 0          | 0          | 104670000  |
| sp Q9288 ERCC4   | sp Q9288 | 1 | 2  | 2  | 2  | 4.8 | 104.48 | 101860000  | 0          | 0          | 0          | 0          | 211260000  |
| sp Q9289 UFD1    | sp Q9289 | 1 | 7  | 7  | 7  | 33  | 34.5   | 730370000  | 694030000  | 620100000  | 598170000  | 698430000  | 414280000  |
| sp Q9289 GLG1    | sp Q9289 | 1 | 12 | 12 | 12 | 16  | 134.55 | 489010000  | 755540000  | 631020000  | 594840000  | 562510000  | 543020000  |
| sp Q9290 UPF1    | sp Q9290 | 1 | 27 | 27 | 27 | 31  | 124.34 | 1979000000 | 1873700000 | 2293700000 | 2135200000 | 2218800000 | 1981400000 |
| sp Q9290 COPS5   | sp Q9290 | 1 | 12 | 12 | 12 | 42  | 37.578 | 804760000  | 909510000  | 922980000  | 688630000  | 686740000  | 784010000  |
| sp Q9291 GPKOW   | sp Q9291 | 1 | 8  | 8  | 8  | 27  | 52.228 | 483670000  | 366510000  | 442880000  | 502820000  | 504830000  | 345680000  |
| sp Q9292 SMARCC  | sp Q9292 | 1 | 16 | 16 | 10 | 21  | 122.87 | 2442200000 | 2014000000 | 2057700000 | 1997000000 | 1660700000 | 2486900000 |
| sp Q9293 BAD     | sp Q9293 | 1 | 2  | 2  | 2  | 16  | 18.392 | 0          | 0          | 0          | 0          | 0          | 26945000   |
| sp Q9294 KHSRP   | sp Q9294 | 1 | 22 | 20 | 20 | 40  | 73.114 | 5167900000 | 4796100000 | 5590000000 | 4979600000 | 5517400000 | 4585900000 |
| sp Q9294 GCDH    | sp Q9294 | 1 | 5  | 5  | 5  | 27  | 48.127 | 149940000  | 0          | 0          | 0          | 148010000  | 134510000  |
| sp Q9297 TNPO1   | sp Q9297 | 1 | 20 | 20 | 17 | 33  | 102.35 | 6971700000 | 6621600000 | 7118400000 | 7047000000 | 6868100000 | 6249100000 |
| sp Q9297 ARHGEF2 | sp Q9297 | 1 | 10 | 10 | 10 | 15  | 111.54 | 636060000  | 557580000  | 443910000  | 550580000  | 527240000  | 506450000  |
| sp Q9297 EMG1    | sp Q9297 | 1 | 9  | 9  | 9  | 52  | 26.72  | 996490000  | 887480000  | 830350000  | 977720000  | 863480000  | 1128300000 |
| sp Q9299 GLMN    | sp Q9299 | 1 | 7  | 7  | 7  | 15  | 68.207 | 250760000  | 358450000  | 314060000  | 288150000  | 308770000  | 254130000  |
| sp Q9299 USP13   | sp Q9299 | 1 | 3  | 3  | 3  | 8.2 | 97.326 | 115910000  | 0          | 0          | 88804000   | 103860000  | 95652000   |
| sp Q9300 USP9X   | sp Q9300 | 1 | 25 | 25 | 15 | 13  | 292.28 | 1058000000 | 1064000000 | 1098100000 | 964160000  | 847080000  | 957790000  |
| sp Q9300 USP7    | sp Q9300 | 1 | 18 | 18 | 18 | 25  | 128.3  | 924280000  | 983170000  | 1090900000 | 862370000  | 816590000  | 1184400000 |
| sp Q9304 STMN2   | sp Q9304 | 1 | 2  | 1  | 1  | 11  | 20.828 | 0          | 0          | 0          | 0          | 0          | 1381900000 |

|                   |           |   |    |    |    |     |        |            |            |            |            |            |            |
|-------------------|-----------|---|----|----|----|-----|--------|------------|------------|------------|------------|------------|------------|
| sp Q93050 ATP6V0A | sp Q93050 | 2 | 7  | 7  | 7  | 10  | 96.412 | 0          | 287240000  | 307460000  | 288960000  | 260320000  | 238490000  |
| sp Q93050 LPP     | sp Q93050 | 1 | 15 | 15 | 15 | 37  | 65.746 | 933600000  | 860230000  | 959870000  | 789630000  | 857440000  | 931150000  |
| sp Q93074 MED12   | sp Q93074 | 1 | 1  | 1  | 1  | 1.4 | 243.08 | 0          | 0          | 0          | 0          | 18164000   | 0          |
| sp Q93090 PTP4A1  | sp Q93090 | 1 | 6  | 6  | 3  | 39  | 19.815 | 363450000  | 481460000  | 354250000  | 616950000  | 601830000  | 673670000  |
| sp Q969E SCAMP4   | sp Q969E  | 1 | 1  | 1  | 1  | 4.8 | 25.728 | 0          | 0          | 0          | 0          | 108270000  | 0          |
| sp Q969E TSR2     | sp Q969E  | 1 | 1  | 1  | 1  | 4.7 | 20.894 | 0          | 0          | 0          | 0          | 0          | 108320000  |
| sp Q969G SMARCE   | sp Q969G  | 1 | 8  | 8  | 8  | 29  | 46.649 | 449820000  | 589870000  | 672150000  | 531690000  | 510750000  | 578990000  |
| sp Q969G CAVIN3   | sp Q969G  | 1 | 2  | 2  | 2  | 10  | 27.701 | 0          | 0          | 0          | 0          | 351660000  | 0          |
| sp Q969H MYDGF    | sp Q969H  | 1 | 5  | 5  | 5  | 37  | 18.795 | 2110300000 | 1709400000 | 3236800000 | 2307600000 | 2432800000 | 2708400000 |
| sp Q969J BORCS5   | sp Q969J  | 1 | 2  | 2  | 2  | 13  | 22.222 | 0          | 0          | 0          | 0          | 43485000   | 0          |
| sp Q969M YIPF5    | sp Q969M  | 1 | 1  | 1  | 1  | 4.7 | 27.989 | 0          | 0          | 0          | 0          | 0          | 140250000  |
| sp Q969N PIGT     | sp Q969N  | 1 | 2  | 2  | 2  | 5   | 65.699 | 0          | 0          | 0          | 0          | 269620000  | 0          |
| sp Q969Q RPL36AL  | sp Q969Q  | 1 | 4  | 4  | 1  | 32  | 12.469 | 4420000000 | 5402200000 | 4812600000 | 4663700000 | 4402000000 | 4472600000 |
| sp Q969S ZNF622   | sp Q969S  | 1 | 6  | 6  | 6  | 17  | 54.271 | 358080000  | 240550000  | 306690000  | 321390000  | 273250000  | 227680000  |
| sp Q969S GFM2     | sp Q969S  | 1 | 3  | 3  | 3  | 5.4 | 86.6   | 141710000  | 99803000   | 81861000   | 88744000   | 106480000  | 113240000  |
| sp Q969T WBP2     | sp Q969T  | 1 | 1  | 1  | 1  | 3.8 | 28.087 | 0          | 0          | 0          | 0          | 88114000   | 0          |
| sp Q969U PSMG2    | sp Q969U  | 1 | 7  | 7  | 7  | 26  | 29.396 | 367920000  | 141920000  | 284820000  | 207010000  | 252490000  | 265270000  |
| sp Q969V NCLN     | sp Q969V  | 1 | 11 | 11 | 11 | 23  | 62.974 | 738130000  | 805930000  | 681810000  | 829080000  | 735580000  | 694900000  |
| sp Q969V MKL1     | sp Q969V  | 1 | 1  | 1  | 1  | 3.1 | 98.918 | 0          | 0          | 0          | 0          | 0          | 11371000   |
| sp Q969X TMBIM1   | sp Q969X  | 1 | 1  | 1  | 1  | 4.5 | 34.607 | 0          | 0          | 0          | 0          | 0          | 37363000   |
| sp Q969X ERGIC1   | sp Q969X  | 1 | 6  | 6  | 6  | 27  | 32.592 | 1338000000 | 1368800000 | 1016300000 | 1067600000 | 1052700000 | 1613600000 |
| sp Q969X UTP4     | sp Q969X  | 1 | 6  | 6  | 6  | 14  | 76.889 | 329060000  | 425540000  | 380700000  | 407440000  | 283720000  | 294000000  |
| sp Q969Y GTPBP3   | sp Q969Y  | 1 | 1  | 1  | 1  | 4.7 | 52.058 | 16481000   | 23143000   | 8561500    | 17623000   | 27722000   | 27122000   |
| sp Q969Z TBRG4    | sp Q969Z  | 1 | 9  | 9  | 9  | 19  | 70.737 | 663220000  | 789430000  | 765200000  | 611910000  | 876410000  | 1093900000 |
| sp Q96A2 FAM162A  | sp Q96A2  | 1 | 4  | 4  | 4  | 30  | 17.342 | 786330000  | 231050000  | 898950000  | 549240000  | 822660000  | 1019500000 |
| sp Q96A3 CCDC47   | sp Q96A3  | 1 | 17 | 17 | 17 | 37  | 55.873 | 1294000000 | 1447800000 | 1347700000 | 1636500000 | 1544300000 | 1971700000 |
| sp Q96A3 MRPL24   | sp Q96A3  | 1 | 3  | 3  | 3  | 16  | 24.915 | 0          | 0          | 0          | 0          | 0          | 81780000   |
| sp Q96A4 SYAP1    | sp Q96A4  | 1 | 9  | 9  | 9  | 30  | 39.933 | 687610000  | 456540000  | 560780000  | 433350000  | 505170000  | 501600000  |
| sp Q96A6 EXOC4    | sp Q96A6  | 1 | 9  | 9  | 9  | 14  | 110.5  | 296380000  | 292470000  | 290980000  | 244300000  | 201860000  | 230540000  |
| sp Q96A7 MAGOHB   | sp Q96A7  | 1 | 4  | 4  | 1  | 31  | 17.276 | 1249800000 | 1486000000 | 1587000000 | 1336400000 | 1598900000 | 1171900000 |
| sp Q96AB ISOC2    | sp Q96AB  | 1 | 2  | 2  | 2  | 24  | 22.337 | 107280000  | 75088000   | 72565000   | 0          | 0          | 119220000  |
| sp Q96AC FERMT2   | sp Q96AC  | 1 | 31 | 31 | 29 | 53  | 77.86  | 5613900000 | 6394900000 | 5526300000 | 5506500000 | 6017400000 | 5062100000 |
| sp Q96AE FUBP1    | sp Q96AE  | 1 | 23 | 23 | 21 | 47  | 67.56  | 9296600000 | 8325400000 | 7712600000 | 7773800000 | 9684700000 | 9379700000 |
| sp Q96AG LRRC59   | sp Q96AG  | 1 | 12 | 12 | 12 | 45  | 34.93  | 8670000000 | 8449300000 | 7354000000 | 9119800000 | 8869300000 | 8628900000 |
| sp Q96AC PBXIP1   | sp Q96AC  | 1 | 3  | 3  | 3  | 6.8 | 80.642 | 0          | 0          | 90974000   | 0          | 0          | 0          |
| sp Q96AT KIAA1143 | sp Q96AT  | 1 | 2  | 2  | 2  | 16  | 17.465 | 0          | 103400000  | 86311000   | 0          | 0          | 0          |
| sp Q96AT RPE      | sp Q96AT  | 2 | 4  | 4  | 4  | 24  | 24.927 | 796440000  | 776610000  | 994680000  | 651710000  | 850540000  | 815450000  |
| sp Q96AY FKBP10   | sp Q96AY  | 1 | 13 | 13 | 13 | 27  | 64.244 | 1812700000 | 1302700000 | 1251200000 | 1433700000 | 1394200000 | 1436800000 |
| sp Q96B0 RAD51AP  | sp Q96B0  | 1 | 1  | 1  | 1  | 4.3 | 38.457 | 0          | 0          | 0          | 0          | 0          | 0          |

|                   |           |   |    |    |    |     |        |            |            |            |            |            |            |
|-------------------|-----------|---|----|----|----|-----|--------|------------|------------|------------|------------|------------|------------|
| sp Q96B2 EXOSC8   | sp Q96B2  | 1 | 5  | 5  | 5  | 30  | 30.039 | 211290000  | 265930000  | 220370000  | 265230000  | 247650000  | 238370000  |
| sp Q96B3 AKT1S1   | sp Q96B3  | 1 | 4  | 4  | 4  | 13  | 27.383 | 0          | 0          | 255560000  | 0          | 0          | 0          |
| sp Q96B4 TOMM6    | sp Q96B4  | 1 | 2  | 2  | 2  | 57  | 8.0019 | 710200000  | 609630000  | 533900000  | 789620000  | 1271200000 | 851390000  |
| sp Q96B5 ZNF428   | sp Q96B5  | 1 | 4  | 4  | 4  | 30  | 20.48  | 185330000  | 225520000  | 131200000  | 179520000  | 209040000  | 127210000  |
| sp Q96B9 SH3KBP1  | sp Q96B9  | 1 | 3  | 3  | 3  | 6.8 | 73.125 | 74507000   | 117460000  | 152490000  | 125170000  | 114490000  | 0          |
| sp Q96BH RNF25    | sp Q96BH  | 1 | 2  | 2  | 2  | 9.2 | 51.218 | 0          | 0          | 0          | 55397000   | 0          | 0          |
| sp Q96BN OTULIN   | sp Q96BN  | 1 | 10 | 10 | 10 | 36  | 40.262 | 612610000  | 476570000  | 411580000  | 649900000  | 536330000  | 605360000  |
| sp Q96BP PPWD1    | sp Q96BP  | 1 | 7  | 7  | 7  | 18  | 73.574 | 234690000  | 177160000  | 150250000  | 156600000  | 225790000  | 134060000  |
| sp Q96BR COA7     | sp Q96BR  | 1 | 4  | 4  | 4  | 30  | 25.709 | 243470000  | 147230000  | 313610000  | 0          | 183160000  | 154430000  |
| sp Q96BV TAMM41   | sp Q96BV  | 1 | 1  | 1  | 1  | 4.4 | 51.066 | 0          | 0          | 0          | 0          | 0          | 55289000   |
| sp Q96BY DOCK10   | sp Q96BY  | 1 | 1  | 1  | 1  | 0.7 | 249.53 | 0          | 0          | 0          | 0          | 0          | 5328100    |
| sp Q96C0 FAM136A  | sp Q96C0  | 1 | 1  | 1  | 1  | 10  | 15.641 | 0          | 0          | 26457000   | 0          | 0          | 0          |
| sp Q96C1 EFHD2    | sp Q96C1  | 2 | 5  | 5  | 5  | 23  | 26.697 | 341510000  | 231940000  | 223890000  | 285680000  | 275740000  | 235930000  |
| sp Q96C2 GALM     | sp Q96C2  | 1 | 2  | 2  | 2  | 6.7 | 37.765 | 0          | 0          | 0          | 0          | 91778000   | 0          |
| sp Q96C3 PYCR2    | sp Q96C3  | 1 | 10 | 9  | 9  | 40  | 33.637 | 464810000  | 381360000  | 504620000  | 540460000  | 442060000  | 461530000  |
| sp Q96C5 CUSTOS   | sp Q96C5  | 1 | 1  | 1  | 1  | 8   | 28.17  | 0          | 0          | 0          | 0          | 0          | 0          |
| sp Q96C8 DCPS     | sp Q96C8  | 1 | 6  | 6  | 6  | 24  | 38.608 | 214770000  | 226060000  | 173590000  | 226930000  | 208620000  | 208530000  |
| sp Q96C9 PPP1R14  | sp Q96C9  | 1 | 4  | 4  | 4  | 48  | 15.911 | 1286800000 | 1101800000 | 1082300000 | 888870000  | 737110000  | 802670000  |
| sp Q96CB INTS12   | sp Q96CB  | 1 | 1  | 1  | 1  | 3   | 48.807 | 0          | 0          | 0          | 0          | 0          | 0          |
| sp Q96CN ISOC1    | sp Q96CN  | 1 | 7  | 7  | 7  | 32  | 32.236 | 426350000  | 595390000  | 489400000  | 422150000  | 361270000  | 388970000  |
| sp Q96CN GCC1     | sp Q96CN  | 1 | 1  | 1  | 1  | 1.3 | 87.81  | 0          | 0          | 0          | 0          | 0          | 491920000  |
| sp Q96CP FLYWCH2  | sp Q96CP  | 2 | 4  | 4  | 4  | 46  | 14.563 | 142030000  | 0          | 154100000  | 110120000  | 165080000  | 0          |
| sp Q96CS FAF2     | sp Q96CS  | 1 | 9  | 9  | 9  | 34  | 52.623 | 1105700000 | 1303800000 | 1305300000 | 1293300000 | 1242200000 | 1233300000 |
| sp Q96CT CCDC124  | sp Q96CT  | 1 | 7  | 7  | 7  | 34  | 25.835 | 469600000  | 459740000  | 559180000  | 458560000  | 519830000  | 609720000  |
| sp Q96CU FOXRED1  | sp Q96CU  | 1 | 2  | 2  | 2  | 6.6 | 53.811 | 0          | 0          | 0          | 0          | 47262000   | 0          |
| sp Q96CV OPTN     | sp Q96CV  | 1 | 1  | 1  | 1  | 2.3 | 65.921 | 0          | 0          | 0          | 0          | 0          | 12537000   |
| sp Q96CV AP2M1    | sp Q96CV  | 1 | 5  | 5  | 5  | 12  | 49.654 | 321510000  | 326420000  | 332180000  | 341390000  | 310170000  | 0          |
| sp Q96CV TUBGCP3  | sp Q96CV  | 1 | 4  | 4  | 4  | 6.6 | 103.57 | 69851000   | 0          | 124710000  | 0          | 0          | 57874000   |
| sp Q96CX KCTD12   | sp Q96CX  | 1 | 7  | 7  | 7  | 37  | 35.7   | 503090000  | 458580000  | 490930000  | 315680000  | 451510000  | 474400000  |
| sp Q96D4 NMD3     | sp Q96D4  | 1 | 8  | 8  | 8  | 22  | 57.603 | 419940000  | 610990000  | 413360000  | 460630000  | 555420000  | 473730000  |
| sp Q96DB RMDN1    | sp Q96DB  | 1 | 2  | 2  | 2  | 7.3 | 35.808 | 139330000  | 126300000  | 0          | 92409000   | 0          | 0          |
| sp Q96DE NUDT16   | sp Q96DE  | 1 | 3  | 3  | 2  | 27  | 21.273 | 21315000   | 72806000   | 49906000   | 51976000   | 52685000   | 29534000   |
| sp Q96DG CMBL     | sp Q96DG  | 1 | 8  | 8  | 8  | 37  | 28.048 | 1701600000 | 1635500000 | 1573300000 | 1297700000 | 1445600000 | 1616200000 |
| sp Q96DH MSI2     | sp Q96DH  | 2 | 4  | 4  | 4  | 17  | 35.196 | 0          | 252980000  | 0          | 0          | 206480000  | 274780000  |
| sp Q96DI7 SNRNP40 | sp Q96DI7 | 1 | 12 | 12 | 12 | 46  | 39.31  | 1668100000 | 1815300000 | 1599300000 | 1528300000 | 1637000000 | 1268000000 |
| sp Q96DV MRPL38   | sp Q96DV  | 1 | 7  | 7  | 7  | 24  | 44.596 | 546690000  | 403980000  | 351350000  | 447710000  | 391620000  | 364960000  |
| sp Q96DZ ERLEC1   | sp Q96DZ  | 1 | 2  | 2  | 2  | 6.4 | 54.858 | 0          | 0          | 0          | 0          | 0          | 22853000   |
| sp Q96E1 MRRF     | sp Q96E1  | 1 | 7  | 7  | 7  | 35  | 29.277 | 849810000  | 1088600000 | 767860000  | 896240000  | 988420000  | 966230000  |
| sp Q96E2 MTERF3   | sp Q96E2  | 1 | 1  | 1  | 1  | 3.1 | 47.971 | 0          | 0          | 0          | 0          | 43760000   | 0          |

|          |          |          |   |    |    |    |     |        |            |            |            |            |            |            |
|----------|----------|----------|---|----|----|----|-----|--------|------------|------------|------------|------------|------------|------------|
| sp Q96EA | SPDL1    | sp Q96EA | 1 | 4  | 4  | 4  | 9.6 | 70.171 | 140110000  | 127690000  | 116960000  | 117310000  | 125940000  | 0          |
| sp Q96EB | ELP4     | sp Q96EB | 1 | 3  | 3  | 3  | 12  | 46.587 | 0          | 0          | 0          | 0          | 31230000   | 0          |
| sp Q96EC | YIPF6    | sp Q96EC | 1 | 1  | 1  | 1  | 5.1 | 26.256 | 0          | 0          | 0          | 0          | 0          | 37400000   |
| sp Q96EE | SEH1L    | sp Q96EE | 1 | 11 | 11 | 11 | 49  | 39.648 | 1261800000 | 1313800000 | 1252500000 | 1465100000 | 1246700000 | 1370900000 |
| sp Q96EI | TCEAL4   | sp Q96EI | 1 | 3  | 3  | 3  | 21  | 24.647 | 163640000  | 141500000  | 0          | 133540000  | 140480000  | 118140000  |
| sp Q96EK | KIF1BP   | sp Q96EK | 1 | 8  | 8  | 8  | 16  | 71.813 | 404390000  | 317710000  | 256980000  | 327900000  | 340800000  | 442440000  |
| sp Q96EK | GNPNAT1  | sp Q96EK | 1 | 7  | 7  | 7  | 59  | 20.749 | 1427800000 | 1185600000 | 1308600000 | 1239300000 | 1679000000 | 1221000000 |
| sp Q96EL | MRPL53   | sp Q96EL | 1 | 4  | 4  | 4  | 49  | 12.107 | 0          | 291540000  | 478730000  | 425780000  | 407630000  | 0          |
| sp Q96EM | L3HYPDH  | sp Q96EM | 1 | 2  | 2  | 2  | 7.3 | 38.137 | 0          | 0          | 0          | 0          | 0          | 26914000   |
| sp Q96EP | DAZAP1   | sp Q96EP | 1 | 5  | 5  | 5  | 19  | 43.383 | 1766100000 | 1292400000 | 1774600000 | 1611500000 | 1424000000 | 1915000000 |
| sp Q96EQ | SGTB     | sp Q96EQ | 1 | 1  | 1  | 1  | 7.9 | 33.429 | 0          | 0          | 0          | 0          | 0          | 16306000   |
| sp Q96ER | SAAL1    | sp Q96ER | 1 | 1  | 1  | 1  | 2.1 | 53.557 | 0          | 0          | 0          | 0          | 0          | 39830000   |
| sp Q96ER | CCDC51   | sp Q96ER | 1 | 8  | 8  | 8  | 24  | 45.811 | 409090000  | 397540000  | 315480000  | 301010000  | 354140000  | 392770000  |
| sp Q96EU | RRP36    | sp Q96EU | 1 | 1  | 1  | 1  | 4.2 | 29.823 | 0          | 0          | 27704000   | 0          | 0          | 0          |
| sp Q96EX | SMIM12   | sp Q96EX | 1 | 1  | 1  | 1  | 12  | 10.799 | 0          | 0          | 95581000   | 0          | 0          | 0          |
| sp Q96EY | DNAJA3   | sp Q96EY | 1 | 8  | 8  | 8  | 24  | 52.488 | 581860000  | 843870000  | 684120000  | 899530000  | 965600000  | 927590000  |
| sp Q96EY | TMA16    | sp Q96EY | 1 | 2  | 2  | 2  | 17  | 23.864 | 0          | 206020000  | 0          | 0          | 0          | 0          |
| sp Q96EY | MVB12A   | sp Q96EY | 1 | 1  | 1  | 1  | 9.5 | 28.783 | 0          | 0          | 0          | 0          | 0          | 7626200    |
| sp Q96EY | PTCD3    | sp Q96EY | 1 | 3  | 3  | 3  | 6   | 78.549 | 105160000  | 94282000   | 160160000  | 141960000  | 167520000  | 146860000  |
| sp Q96EY | MMAB     | sp Q96EY | 1 | 2  | 2  | 2  | 12  | 27.388 | 74710000   | 71748000   | 82952000   | 0          | 109870000  | 0          |
| sp Q96EZ | MCRS1    | sp Q96EZ | 1 | 1  | 1  | 1  | 3.9 | 51.803 | 0          | 0          | 0          | 0          | 0          | 119860000  |
| sp Q96F8 | EDC3     | sp Q96F8 | 1 | 6  | 6  | 6  | 17  | 56.077 | 148320000  | 239750000  | 142210000  | 294770000  | 186190000  | 182420000  |
| sp Q96FJ | STAMBPL1 | sp Q96FJ | 1 | 2  | 2  | 2  | 8.5 | 49.783 | 0          | 107190000  | 0          | 125430000  | 0          | 0          |
| sp Q96FJ | DYNLL2   | sp Q96FJ | 1 | 4  | 2  | 2  | 57  | 10.35  | 119080000  | 130280000  | 121070000  | 139200000  | 141430000  | 162490000  |
| sp Q96FQ | S100A16  | sp Q96FQ | 1 | 5  | 5  | 5  | 53  | 11.801 | 2612600000 | 2556000000 | 2421900000 | 2123400000 | 2614300000 | 2358200000 |
| sp Q96FV | SCRN2    | sp Q96FV | 1 | 2  | 2  | 2  | 11  | 46.596 | 293100000  | 0          | 0          | 0          | 246340000  | 0          |
| sp Q96FV | THOC1    | sp Q96FV | 1 | 9  | 9  | 9  | 15  | 75.665 | 286060000  | 256520000  | 286030000  | 249780000  | 264460000  | 310230000  |
| sp Q96FW | OTUB1    | sp Q96FW | 1 | 10 | 10 | 10 | 49  | 31.284 | 2338100000 | 2524100000 | 2641700000 | 2516900000 | 2497400000 | 2296400000 |
| sp Q96FX | TRMT61A  | sp Q96FX | 1 | 2  | 2  | 2  | 9.7 | 31.381 | 81893000   | 77832000   | 69329000   | 72437000   | 81791000   | 76341000   |
| sp Q96FX | PERP     | sp Q96FX | 1 | 1  | 1  | 1  | 8.8 | 21.386 | 0          | 0          | 0          | 16244000   | 0          | 0          |
| sp Q96FZ | CHMP6    | sp Q96FZ | 1 | 1  | 1  | 1  | 6.5 | 23.485 | 0          | 0          | 0          | 0          | 0          | 42222000   |
| sp Q96G0 | PGM2     | sp Q96G0 | 1 | 8  | 8  | 8  | 18  | 68.283 | 390830000  | 342980000  | 335090000  | 352470000  | 310590000  | 331070000  |
| sp Q96G2 | IMP4     | sp Q96G2 | 1 | 3  | 3  | 3  | 11  | 33.756 | 115790000  | 98055000   | 91924000   | 100210000  | 117510000  | 0          |
| sp Q96G2 | CERS2    | sp Q96G2 | 1 | 4  | 4  | 4  | 14  | 44.876 | 568610000  | 1124200000 | 897230000  | 871700000  | 907830000  | 796540000  |
| sp Q96G4 | DUS3L    | sp Q96G4 | 1 | 6  | 6  | 6  | 15  | 72.593 | 141180000  | 213590000  | 161550000  | 174520000  | 191270000  | 182610000  |
| sp Q96GA | LTV1     | sp Q96GA | 1 | 1  | 1  | 1  | 4   | 54.854 | 0          | 0          | 0          | 51389000   | 0          | 0          |
| sp Q96GC | MRPL48   | sp Q96GC | 1 | 4  | 4  | 4  | 22  | 23.934 | 0          | 300840000  | 245180000  | 228090000  | 296200000  | 282230000  |
| sp Q96GC | VMP1     | sp Q96GC | 1 | 2  | 2  | 2  | 9.1 | 46.237 | 0          | 0          | 91920000   | 199730000  | 188320000  | 0          |
| sp Q96GD | PDXP     | sp Q96GD | 1 | 2  | 2  | 2  | 13  | 31.698 | 113490000  | 0          | 0          | 0          | 0          | 0          |



|                   |           |   |    |    |    |     |        |            |            |            |            |            |            |
|-------------------|-----------|---|----|----|----|-----|--------|------------|------------|------------|------------|------------|------------|
| sp Q96GD AURKB    | sp Q96GD  | 2 | 5  | 5  | 5  | 22  | 39.31  | 107790000  | 99238000   | 127940000  | 109770000  | 103000000  | 122860000  |
| sp Q96GE DMAC1    | sp Q96GE  | 1 | 2  | 2  | 2  | 33  | 12.257 | 0          | 0          | 147250000  | 0          | 0          | 0          |
| sp Q96GG DCUN1D1  | sp Q96GG  | 1 | 4  | 4  | 4  | 21  | 30.124 | 317960000  | 313590000  | 0          | 0          | 382510000  | 252660000  |
| sp Q96GM SMARCD   | sp Q96GM  | 3 | 5  | 5  | 5  | 13  | 58.232 | 203190000  | 177610000  | 215600000  | 196260000  | 199520000  | 293420000  |
| sp Q96GM TOE1     | sp Q96GM  | 1 | 5  | 5  | 5  | 18  | 56.547 | 278460000  | 0          | 214220000  | 222710000  | 265210000  | 0          |
| sp Q96GC DDX27    | sp Q96GC  | 1 | 15 | 15 | 15 | 21  | 89.834 | 1084800000 | 1030100000 | 1088300000 | 1169200000 | 949670000  | 1082100000 |
| sp Q96GV MARS2    | sp Q96GV  | 1 | 2  | 2  | 2  | 7.4 | 66.59  | 0          | 0          | 0          | 76803000   | 0          | 0          |
| sp Q96GX APIP     | sp Q96GX  | 1 | 1  | 1  | 1  | 7   | 27.125 | 0          | 0          | 0          | 0          | 0          | 94002000   |
| sp Q96H2 SNF8     | sp Q96H2  | 1 | 1  | 1  | 1  | 4.7 | 28.864 | 0          | 0          | 0          | 0          | 0          | 84416000   |
| sp Q96H7 ZC3HAV1  | sp Q96H7  | 1 | 3  | 3  | 3  | 15  | 32.962 | 197090000  | 0          | 0          | 0          | 0          | 0          |
| sp Q96HC PDLIM5   | sp Q96HC  | 1 | 22 | 22 | 22 | 51  | 63.944 | 4031000000 | 4452500000 | 3712700000 | 4915400000 | 5132600000 | 4985500000 |
| sp Q96HE ERO1A    | sp Q96HE  | 2 | 12 | 12 | 12 | 36  | 54.392 | 1298000000 | 1125900000 | 1114100000 | 1167400000 | 1256400000 | 1148400000 |
| sp Q96HP OXNAD1   | sp Q96HP  | 1 | 1  | 1  | 1  | 3.8 | 34.854 | 0          | 0          | 0          | 0          | 0          | 16944000   |
| sp Q96HC CDKN2A1  | sp Q96HC  | 1 | 1  | 1  | 1  | 16  | 13.196 | 0          | 0          | 0          | 0          | 0          | 13484000   |
| sp Q96HR NAF1     | sp Q96HR  | 1 | 1  | 1  | 1  | 3   | 53.716 | 0          | 0          | 0          | 0          | 0          | 104330000  |
| sp Q96HS PGAM5    | sp Q96HS  | 1 | 12 | 12 | 12 | 50  | 32.004 | 966600000  | 972850000  | 999430000  | 796340000  | 863630000  | 1138600000 |
| sp Q96HY DDR GK1  | sp Q96HY  | 1 | 3  | 3  | 3  | 15  | 35.61  | 129580000  | 178740000  | 168580000  | 201360000  | 212850000  | 174290000  |
| sp Q96I24 FUBP3   | sp Q96I24 | 1 | 21 | 20 | 20 | 52  | 61.64  | 2887200000 | 2968800000 | 2954500000 | 2509500000 | 2933700000 | 2711400000 |
| sp Q96I25 RBM17   | sp Q96I25 | 1 | 7  | 7  | 7  | 21  | 44.961 | 285630000  | 337640000  | 337810000  | 325830000  | 474620000  | 305650000  |
| sp Q96I51 RCC1L   | sp Q96I51 | 1 | 2  | 2  | 2  | 6.7 | 49.996 | 0          | 0          | 0          | 0          | 0          | 110280000  |
| sp Q96I99 SUCLG2  | sp Q96I99 | 1 | 14 | 14 | 14 | 39  | 46.51  | 1466400000 | 1618800000 | 1573700000 | 1695200000 | 1655500000 | 1623600000 |
| sp Q96IJ6 GMPPA   | sp Q96IJ6 | 1 | 6  | 6  | 6  | 23  | 46.291 | 304810000  | 342680000  | 254280000  | 295320000  | 260770000  | 228870000  |
| sp Q96IR7 HPDL    | sp Q96IR7 | 1 | 2  | 2  | 2  | 14  | 39.385 | 147400000  | 48558000   | 60893000   | 261520000  | 148640000  | 155600000  |
| sp Q96IU4 ABHD14B | sp Q96IU4 | 1 | 5  | 5  | 5  | 33  | 22.345 | 421980000  | 385440000  | 376590000  | 481830000  | 436890000  | 356780000  |
| sp Q96IX5 USMG5   | sp Q96IX5 | 1 | 3  | 3  | 3  | 45  | 6.4575 | 0          | 2160900000 | 1806300000 | 0          | 0          | 2263000000 |
| sp Q96IY1 NSL1    | sp Q96IY1 | 1 | 1  | 1  | 1  | 5.3 | 32.162 | 0          | 0          | 0          | 0          | 39689000   | 0          |
| sp Q96IZ0 PAWR    | sp Q96IZ0 | 1 | 8  | 8  | 8  | 46  | 36.567 | 786180000  | 841680000  | 830540000  | 748350000  | 934640000  | 718760000  |
| sp Q96J0 THOC3    | sp Q96J0  | 1 | 5  | 5  | 5  | 18  | 38.771 | 424110000  | 459320000  | 517220000  | 459040000  | 435830000  | 418580000  |
| sp Q96J0 ITCH     | sp Q96J0  | 1 | 3  | 3  | 3  | 4.3 | 102.8  | 59894000   | 0          | 0          | 88629000   | 0          | 0          |
| sp Q96J4 TXNDC15  | sp Q96J4  | 1 | 1  | 1  | 1  | 5.3 | 39.885 | 0          | 0          | 0          | 22057000   | 0          | 0          |
| sp Q96JB DNAH8    | sp Q96JB  | 1 | 4  | 4  | 4  | 1.2 | 514.66 | 1698800000 | 1932300000 | 922310000  | 1546600000 | 1959900000 | 1834500000 |
| sp Q96JB COG3     | sp Q96JB  | 1 | 3  | 3  | 3  | 4.7 | 94.095 | 22657000   | 0          | 48201000   | 43751000   | 42297000   | 61220000   |
| sp Q96JB CDK5RAP  | sp Q96JB  | 1 | 5  | 5  | 5  | 12  | 56.92  | 0          | 113590000  | 93419000   | 104800000  | 110060000  | 118270000  |
| sp Q96JC VPS39    | sp Q96JC  | 1 | 2  | 2  | 2  | 4.2 | 101.81 | 0          | 0          | 0          | 0          | 54259000   | 0          |
| sp Q96JG VPS50    | sp Q96JG  | 1 | 5  | 5  | 5  | 7.9 | 111.17 | 197770000  | 273420000  | 248400000  | 244000000  | 203190000  | 222030000  |
| sp Q96JH VCPIP1   | sp Q96JH  | 1 | 3  | 3  | 3  | 4.1 | 134.32 | 0          | 0          | 0          | 0          | 0          | 88298000   |
| sp Q96JI7 SPG11   | sp Q96JI7 | 1 | 2  | 2  | 2  | 2.1 | 278.86 | 172500000  | 0          | 0          | 0          | 0          | 0          |
| sp Q96JJ3 ELMO2   | sp Q96JJ3 | 2 | 5  | 5  | 5  | 12  | 82.614 | 116170000  | 120830000  | 0          | 143480000  | 171240000  | 0          |
| sp Q96JJ7 TMX3    | sp Q96JJ7 | 1 | 9  | 9  | 9  | 21  | 51.871 | 558610000  | 476790000  | 531650000  | 568630000  | 643160000  | 584000000  |

|                  |          |   |    |    |    |     |        |            |            |            |             |             |            |
|------------------|----------|---|----|----|----|-----|--------|------------|------------|------------|-------------|-------------|------------|
| sp Q96JM CHAMP1  | sp Q96JM | 1 | 3  | 3  | 3  | 4.1 | 89.098 | 59837000   | 45807000   | 63620000   | 50413000    | 48063000    | 37626000   |
| sp Q96JX SERAC1  | sp Q96JX | 1 | 1  | 1  | 1  | 1.4 | 74.147 | 0          | 0          | 0          | 0           | 246850000   | 0          |
| sp Q96JY PDLIM2  | sp Q96JY | 1 | 1  | 1  | 1  | 3.1 | 37.458 | 0          | 0          | 0          | 0           | 0           | 20454000   |
| sp Q96K1 BTF3L4  | sp Q96K1 | 1 | 5  | 5  | 5  | 41  | 17.27  | 363500000  | 467630000  | 375410000  | 453560000   | 478880000   | 356230000  |
| sp Q96K1 RNF170  | sp Q96K1 | 1 | 1  | 1  | 1  | 5.4 | 29.814 | 0          | 0          | 0          | 22407000    | 0           | 0          |
| sp Q96K3 SLC35E1 | sp Q96K3 | 1 | 1  | 1  | 1  | 5.9 | 44.772 | 0          | 0          | 0          | 0           | 0           | 53081000   |
| sp Q96K7 USP47   | sp Q96K7 | 1 | 10 | 10 | 10 | 12  | 157.31 | 296390000  | 268770000  | 211260000  | 225890000   | 211720000   | 257880000  |
| sp Q96KA CLPTM1L | sp Q96KA | 1 | 9  | 9  | 9  | 24  | 62.228 | 979580000  | 794570000  | 916160000  | 1188400000  | 711970000   | 946770000  |
| sp Q96KB PBK     | sp Q96KB | 1 | 8  | 8  | 8  | 35  | 36.085 | 735750000  | 864580000  | 703830000  | 760860000   | 723430000   | 693530000  |
| sp Q96KG SCYL1   | sp Q96KG | 1 | 5  | 5  | 5  | 7.8 | 89.63  | 205480000  | 194150000  | 192250000  | 223530000   | 189560000   | 229660000  |
| sp Q96KP EXOC2   | sp Q96KP | 1 | 3  | 3  | 3  | 5   | 104.07 | 0          | 0          | 120440000  | 0           | 0           | 0          |
| sp Q96KP CNDP2   | sp Q96KP | 1 | 15 | 15 | 15 | 43  | 52.878 | 1785500000 | 1645900000 | 1605000000 | 1723300000  | 1689800000  | 1936000000 |
| sp Q96KC EHMT2   | sp Q96KC | 1 | 2  | 2  | 2  | 3.1 | 132.37 | 27990000   | 0          | 27841000   | 43453000    | 79487000    | 0          |
| sp Q96KR ZFR     | sp Q96KR | 1 | 20 | 20 | 20 | 29  | 117.01 | 1.2539E+10 | 1.0824E+10 | 1.3084E+10 | 10140000000 | 11699000000 | 1.1214E+10 |
| sp Q96L9 SNX27   | sp Q96L9 | 1 | 3  | 3  | 3  | 6.7 | 61.264 | 0          | 53128000   | 72294000   | 77988000    | 85240000    | 62620000   |
| sp Q96LD TRIM47  | sp Q96LD | 1 | 7  | 7  | 7  | 15  | 69.531 | 0          | 0          | 0          | 240010000   | 235840000   | 215500000  |
| sp Q96LJ DHRS1   | sp Q96LJ | 1 | 3  | 3  | 3  | 11  | 33.909 | 63817000   | 76688000   | 0          | 0           | 44838000    | 92404000   |
| sp Q96LR UBE2E2  | sp Q96LR | 1 | 3  | 3  | 2  | 22  | 22.255 | 0          | 0          | 0          | 0           | 82623000    | 0          |
| sp Q96M2 PRRC1   | sp Q96M2 | 1 | 6  | 6  | 6  | 17  | 46.701 | 455380000  | 452760000  | 464020000  | 553430000   | 320590000   | 469910000  |
| sp Q96ME FBXL18  | sp Q96ME | 1 | 2  | 2  | 2  | 3   | 88.34  | 0          | 0          | 0          | 41800000    | 0           | 0          |
| sp Q96ME ZNF512  | sp Q96ME | 1 | 2  | 2  | 2  | 9.3 | 64.681 | 112660000  | 97252000   | 107210000  | 110480000   | 117500000   | 118250000  |
| sp Q96MC NSMCE3  | sp Q96MC | 1 | 1  | 1  | 1  | 5.3 | 34.308 | 0          | 0          | 0          | 0           | 0           | 0          |
| sp Q96ML YTHDC1  | sp Q96ML | 1 | 2  | 2  | 2  | 2.5 | 84.699 | 0          | 0          | 0          | 0           | 34476000    | 0          |
| sp Q96MV CCDC43  | sp Q96MV | 1 | 1  | 1  | 1  | 13  | 25.248 | 49188000   | 20128000   | 66237000   | 0           | 0           | 0          |
| sp Q96MX WDR92   | sp Q96MX | 1 | 3  | 3  | 3  | 14  | 39.74  | 64088000   | 88196000   | 0          | 68069000    | 77900000    | 102770000  |
| sp Q96N6 MBOAT7  | sp Q96N6 | 1 | 5  | 5  | 5  | 15  | 52.764 | 745390000  | 852890000  | 952290000  | 828510000   | 629590000   | 770540000  |
| sp Q96N6 DOCK7   | sp Q96N6 | 1 | 3  | 3  | 3  | 2.8 | 242.56 | 87937000   | 101180000  | 0          | 106350000   | 110750000   | 89159000   |
| sp Q96NC ZMAT2   | sp Q96NC | 1 | 1  | 1  | 1  | 10  | 23.612 | 0          | 0          | 0          | 0           | 0           | 109760000  |
| sp Q96NH TBC1D32 | sp Q96NH | 1 | 1  | 1  | 1  | 1.4 | 144.75 | 0          | 0          | 0          | 0           | 134720000   | 0          |
| sp Q96NU SAMMD11 | sp Q96NU | 1 | 2  | 2  | 2  | 6   | 72.707 | 0          | 76549000   | 91376000   | 0           | 119060000   | 0          |
| sp Q96P1 NSUN5   | sp Q96P1 | 2 | 2  | 2  | 2  | 5.8 | 46.691 | 103830000  | 141820000  | 0          | 94401000    | 74227000    | 0          |
| sp Q96P1 RPRD1A  | sp Q96P1 | 1 | 6  | 6  | 5  | 28  | 35.719 | 328270000  | 375430000  | 334360000  | 420060000   | 428690000   | 446430000  |
| sp Q96P4 ARAP1   | sp Q96P4 | 1 | 2  | 2  | 2  | 1.7 | 162.19 | 0          | 0          | 0          | 0           | 32863000    | 0          |
| sp Q96P7 IPO9    | sp Q96P7 | 1 | 14 | 14 | 14 | 20  | 115.96 | 2057700000 | 2040300000 | 2211500000 | 2361700000  | 1841700000  | 1672700000 |
| sp Q96PC MIA2    | sp Q96PC | 3 | 4  | 4  | 4  | 4.2 | 159.83 | 0          | 267650000  | 0          | 235730000   | 245340000   | 224480000  |
| sp Q96PK RBM14   | sp Q96PK | 1 | 17 | 17 | 17 | 32  | 69.491 | 3866900000 | 3855200000 | 3843100000 | 4371200000  | 4131600000  | 5096000000 |
| sp Q96PU UHRF2   | sp Q96PU | 1 | 2  | 2  | 2  | 3   | 89.984 | 0          | 0          | 0          | 46957000    | 0           | 0          |
| sp Q96PU QKI     | sp Q96PU | 1 | 2  | 2  | 2  | 7   | 37.67  | 116340000  | 91436000   | 110510000  | 0           | 104970000   | 79267000   |
| sp Q96PZ PUS7    | sp Q96PZ | 1 | 12 | 12 | 12 | 29  | 75.035 | 560520000  | 521310000  | 642330000  | 593380000   | 613510000   | 538090000  |

|           |         |           |   |    |    |    |     |        |            |            |            |            |            |            |
|-----------|---------|-----------|---|----|----|----|-----|--------|------------|------------|------------|------------|------------|------------|
| sp Q96Q1  | TRNT1   | sp Q96Q1  | 2 | 7  | 7  | 7  | 20  | 50.127 | 336380000  | 413390000  | 371820000  | 372870000  | 406480000  | 388810000  |
| sp Q96Q1  | SMG1    | sp Q96Q1  | 1 | 1  | 1  | 1  | 0.6 | 410.5  | 0          | 0          | 0          | 12533000   | 0          | 0          |
| sp Q96QC  | PPP1R10 | sp Q96QC  | 1 | 6  | 6  | 6  | 9.7 | 99.057 | 159310000  | 0          | 0          | 166620000  | 201280000  | 0          |
| sp Q96QL  | SLC38A2 | sp Q96QL  | 1 | 3  | 3  | 3  | 11  | 56.025 | 352780000  | 415850000  | 442100000  | 291820000  | 301440000  | 348270000  |
| sp Q96QK  | VPS35   | sp Q96QK  | 1 | 19 | 19 | 19 | 28  | 91.706 | 3063800000 | 3283500000 | 3441900000 | 3138700000 | 2944700000 | 2965800000 |
| sp Q96QF  | PURB    | sp Q96QF  | 1 | 4  | 4  | 4  | 28  | 33.24  | 275980000  | 267700000  | 293990000  | 312990000  | 286410000  | 328980000  |
| sp Q96QU  | XPO6    | sp Q96QU  | 1 | 2  | 2  | 2  | 2.1 | 128.88 | 0          | 0          | 25497000   | 32359000   | 0          | 0          |
| sp Q96R0  | SPAG5   | sp Q96R0  | 1 | 4  | 4  | 4  | 5.4 | 134.42 | 165090000  | 306320000  | 146650000  | 185800000  | 148210000  | 204780000  |
| sp Q96RD  | PANX1   | sp Q96RD  | 1 | 1  | 1  | 1  | 3.3 | 48.05  | 0          | 0          | 0          | 0          | 0          | 9832500    |
| sp Q96RE  | NACC1   | sp Q96RE  | 2 | 5  | 5  | 5  | 15  | 57.258 | 136860000  | 139770000  | 144730000  | 127310000  | 0          | 0          |
| sp Q96RN  | MED15   | sp Q96RN  | 1 | 1  | 1  | 1  | 1.4 | 86.753 | 0          | 0          | 0          | 0          | 0          | 15828000   |
| sp Q96RF  | GFM1    | sp Q96RF  | 1 | 18 | 18 | 18 | 28  | 83.471 | 990020000  | 1154500000 | 1061500000 | 1063200000 | 1211700000 | 1099200000 |
| sp Q96RC  | ERGIC2  | sp Q96RC  | 1 | 5  | 5  | 5  | 18  | 42.548 | 235260000  | 280570000  | 316400000  | 291230000  | 405750000  | 307040000  |
| sp Q96RC  | MCCC1   | sp Q96RC  | 1 | 3  | 3  | 3  | 8.4 | 80.472 | 0          | 0          | 0          | 37742000   | 42899000   | 0          |
| sp Q96RS  | NUDCD1  | sp Q96RS  | 1 | 9  | 9  | 9  | 18  | 66.755 | 429050000  | 491520000  | 430710000  | 397620000  | 435780000  | 442420000  |
| sp Q96RT  | ERBIN   | sp Q96RT  | 1 | 2  | 2  | 2  | 3.5 | 158.3  | 0          | 45742000   | 0          | 34048000   | 0          | 0          |
| sp Q96RU  | FNBP1   | sp Q96RU  | 1 | 2  | 2  | 2  | 6.2 | 71.306 | 0          | 0          | 0          | 0          | 26393000   | 0          |
| sp Q96S4  | TP53RK  | sp Q96S4  | 1 | 4  | 4  | 4  | 23  | 28.16  | 206840000  | 187390000  | 162480000  | 201420000  | 172230000  | 151150000  |
| sp Q96S5  | PIGS    | sp Q96S5  | 1 | 8  | 8  | 8  | 22  | 61.655 | 289950000  | 361430000  | 355560000  | 363340000  | 332920000  | 429590000  |
| sp Q96S5  | WRNIP1  | sp Q96S5  | 1 | 4  | 4  | 4  | 9.2 | 72.132 | 0          | 0          | 0          | 0          | 136570000  | 0          |
| sp Q96S5  | RANBP9  | sp Q96S5  | 1 | 2  | 2  | 2  | 4.7 | 77.846 | 0          | 32375000   | 0          | 0          | 38211000   | 0          |
| sp Q96S6  | CLCC1   | sp Q96S6  | 1 | 1  | 1  | 1  | 3.1 | 62.022 | 0          | 0          | 0          | 0          | 0          | 30112000   |
| sp Q96S8  | UBL7    | sp Q96S8  | 1 | 5  | 5  | 5  | 19  | 40.51  | 228910000  | 315260000  | 233580000  | 237950000  | 0          | 211500000  |
| sp Q96S9  | MYADM   | sp Q96S9  | 1 | 3  | 3  | 3  | 14  | 35.273 | 289350000  | 307220000  | 272770000  | 355000000  | 357180000  | 332310000  |
| sp Q96SB  | SRPK1   | sp Q96SB  | 2 | 7  | 7  | 6  | 14  | 74.324 | 636670000  | 527180000  | 643010000  | 420880000  | 417840000  | 491570000  |
| sp Q96SI9 | STRBP   | sp Q96SI9 | 1 | 6  | 3  | 3  | 11  | 73.652 | 0          | 0          | 0          | 0          | 0          | 37928000   |
| sp Q96SK  | TMEM209 | sp Q96SK  | 1 | 5  | 5  | 5  | 17  | 62.921 | 148430000  | 149730000  | 0          | 147020000  | 134780000  | 0          |
| sp Q96ST  | IWS1    | sp Q96ST  | 1 | 4  | 4  | 4  | 6.8 | 91.954 | 216830000  | 110320000  | 127930000  | 155600000  | 189970000  | 110740000  |
| sp Q96ST  | SIN3A   | sp Q96ST  | 1 | 9  | 9  | 9  | 12  | 145.17 | 234410000  | 252470000  | 340100000  | 304820000  | 295860000  | 298690000  |
| sp Q96SU  | OSBPL9  | sp Q96SU  | 1 | 5  | 5  | 5  | 9.8 | 83.184 | 188800000  | 190650000  | 0          | 0          | 237600000  | 196700000  |
| sp Q96SV  | CRBN    | sp Q96SV  | 1 | 1  | 1  | 1  | 4.8 | 50.545 | 0          | 0          | 0          | 19575000   | 0          | 0          |
| sp Q96SY  | INTS14  | sp Q96SY  | 1 | 2  | 2  | 2  | 7.7 | 57.47  | 0          | 0          | 0          | 0          | 0          | 76651000   |
| sp Q96SZ  | ADO     | sp Q96SZ  | 1 | 2  | 2  | 2  | 10  | 29.751 | 0          | 0          | 0          | 0          | 0          | 35891000   |
| sp Q96SZ  | CDK5RAP | sp Q96SZ  | 1 | 3  | 3  | 3  | 9.7 | 67.688 | 0          | 0          | 42236000   | 0          | 0          | 0          |
| sp Q96T2  | RSF1    | sp Q96T2  | 1 | 5  | 5  | 5  | 4.9 | 163.82 | 131470000  | 189550000  | 170130000  | 140740000  | 129960000  | 112160000  |
| sp Q96T3  | RBM15   | sp Q96T3  | 1 | 8  | 8  | 8  | 14  | 107.19 | 310060000  | 268970000  | 287400000  | 263440000  | 331560000  | 269640000  |
| sp Q96T5  | RUFY1   | sp Q96T5  | 1 | 7  | 7  | 7  | 15  | 79.817 | 326450000  | 351440000  | 339190000  | 318520000  | 298760000  | 346850000  |
| sp Q96T7  | MMS19   | sp Q96T7  | 1 | 6  | 6  | 6  | 11  | 113.29 | 0          | 268050000  | 193550000  | 171670000  | 125430000  | 143160000  |
| sp Q96T8  | UHRF1   | sp Q96T8  | 1 | 11 | 11 | 11 | 18  | 89.813 | 385040000  | 356040000  | 299190000  | 228440000  | 220090000  | 256260000  |

|                   |          |   |    |    |    |     |        |            |            |            |             |             |            |
|-------------------|----------|---|----|----|----|-----|--------|------------|------------|------------|-------------|-------------|------------|
| sp Q96TA FAM129B  | sp Q96TA | 1 | 22 | 22 | 22 | 40  | 84.137 | 3119300000 | 3721900000 | 3536400000 | 2802700000  | 2212100000  | 2791300000 |
| sp Q96TA YME1L1   | sp Q96TA | 1 | 7  | 7  | 7  | 12  | 86.454 | 246470000  | 225340000  | 309580000  | 230450000   | 188360000   | 249820000  |
| sp Q96TC RMDN3    | sp Q96TC | 1 | 8  | 8  | 8  | 23  | 52.118 | 293380000  | 167890000  | 306320000  | 539100000   | 283170000   | 322220000  |
| sp Q9941 MYCBP    | sp Q9941 | 1 | 5  | 5  | 5  | 52  | 11.967 | 668260000  | 580260000  | 598260000  | 458890000   | 586600000   | 556850000  |
| sp Q9942 TCB      | sp Q9942 | 1 | 6  | 6  | 6  | 30  | 27.325 | 977340000  | 1014200000 | 772390000  | 915340000   | 905590000   | 954430000  |
| sp Q9943 PSMB7    | sp Q9943 | 1 | 6  | 6  | 6  | 26  | 29.965 | 1918300000 | 2494700000 | 2159600000 | 2008800000  | 2311500000  | 1937600000 |
| sp Q9943 CNN2     | sp Q9943 | 1 | 11 | 11 | 10 | 54  | 33.697 | 3244000000 | 3198300000 | 3273600000 | 3147800000  | 2884200000  | 2580500000 |
| sp Q9944 SEC62    | sp Q9944 | 1 | 1  | 1  | 1  | 2.3 | 45.861 | 0          | 0          | 0          | 0           | 0           | 94620000   |
| sp Q9944 PCYT2    | sp Q9944 | 1 | 3  | 3  | 3  | 13  | 43.835 | 245070000  | 276330000  | 264540000  | 228870000   | 301320000   | 351980000  |
| sp Q9945 CDC5L    | sp Q9945 | 1 | 20 | 20 | 20 | 36  | 92.25  | 1658300000 | 1872400000 | 1515100000 | 1664600000  | 1900300000  | 1800600000 |
| sp Q9946 PSMD1    | sp Q9946 | 1 | 37 | 37 | 37 | 49  | 105.84 | 5338500000 | 5224200000 | 4998500000 | 4829100000  | 6157100000  | 5810600000 |
| sp Q9947 SDF2     | sp Q9947 | 1 | 5  | 5  | 5  | 33  | 23.026 | 83222000   | 116230000  | 135810000  | 129400000   | 138530000   | 166410000  |
| sp Q9947 PFDN5    | sp Q9947 | 1 | 9  | 9  | 9  | 71  | 17.328 | 2083700000 | 1455200000 | 1897700000 | 1948800000  | 2797900000  | 1927400000 |
| sp Q9949 PARK7    | sp Q9949 | 1 | 12 | 12 | 12 | 74  | 19.891 | 1.1139E+10 | 1.4358E+10 | 1.046E+10  | 11741000000 | 14105000000 | 1.1584E+10 |
| sp Q9950 EYA3     | sp Q9950 | 1 | 2  | 2  | 2  | 5.8 | 62.662 | 70416000   | 0          | 0          | 0           | 0           | 0          |
| sp Q9953 VAT1     | sp Q9953 | 1 | 11 | 11 | 11 | 47  | 41.92  | 1732200000 | 2590400000 | 2154800000 | 2114200000  | 2137500000  | 1898800000 |
| sp Q9953 LGMN     | sp Q9953 | 1 | 3  | 3  | 3  | 18  | 49.411 | 110700000  | 250390000  | 0          | 56852000    | 0           | 0          |
| sp Q9954 DNAJC2   | sp Q9954 | 1 | 8  | 8  | 8  | 16  | 71.996 | 287270000  | 232950000  | 245430000  | 213180000   | 224570000   | 226700000  |
| sp Q9954 MPHOSP   | sp Q9954 | 1 | 2  | 2  | 2  | 18  | 19.024 | 0          | 0          | 99471000   | 0           | 0           | 122950000  |
| sp Q9955 MAP3K14  | sp Q9955 | 1 | 2  | 2  | 2  | 1.7 | 104.04 | 273300000  | 179980000  | 0          | 274210000   | 243920000   | 282380000  |
| sp Q9956 NUP88    | sp Q9956 | 1 | 13 | 13 | 13 | 26  | 83.541 | 934090000  | 992410000  | 685350000  | 1010300000  | 873180000   | 926910000  |
| sp Q9957 PIK3R4   | sp Q9957 | 1 | 3  | 3  | 3  | 3.1 | 153.1  | 0          | 0          | 0          | 0           | 0           | 59228000   |
| sp Q9957 POP1     | sp Q9957 | 1 | 13 | 13 | 13 | 24  | 114.71 | 514130000  | 438840000  | 516490000  | 548810000   | 404590000   | 458190000  |
| sp Q9958 S100A13  | sp Q9958 | 1 | 6  | 6  | 6  | 49  | 11.471 | 1958300000 | 1951300000 | 1869100000 | 1670500000  | 2265100000  | 1819000000 |
| sp Q9959 SCAF11   | sp Q9959 | 1 | 10 | 10 | 10 | 11  | 164.65 | 546100000  | 547550000  | 438380000  | 0           | 522770000   | 522910000  |
| sp Q9959 TIMM17A  | sp Q9959 | 1 | 1  | 1  | 1  | 13  | 18.023 | 0          | 0          | 0          | 0           | 38539000    | 0          |
| sp Q9959 TSNAX    | sp Q9959 | 1 | 6  | 6  | 6  | 30  | 33.112 | 429620000  | 362190000  | 416460000  | 554880000   | 452420000   | 367490000  |
| sp Q9961 EIF3C    | sp Q9961 | 2 | 29 | 29 | 29 | 38  | 105.34 | 4210500000 | 4884800000 | 4797600000 | 4312300000  | 4483000000  | 4578500000 |
| sp Q9961 TTC1     | sp Q9961 | 1 | 9  | 9  | 9  | 39  | 33.526 | 1110300000 | 874430000  | 1031600000 | 1015800000  | 899840000   | 998950000  |
| sp Q9961 DNAJC7   | sp Q9961 | 1 | 20 | 20 | 20 | 45  | 56.44  | 2222500000 | 2277800000 | 2221200000 | 2115100000  | 2024800000  | 2433300000 |
| sp Q9961 CDCA3    | sp Q9961 | 1 | 2  | 2  | 2  | 13  | 28.998 | 0          | 0          | 68928000   | 47822000    | 0           | 102530000  |
| sp Q9962 C12orf57 | sp Q9962 | 1 | 3  | 3  | 3  | 37  | 13.178 | 198300000  | 191790000  | 321240000  | 188670000   | 174530000   | 157180000  |
| sp Q9962 PHB2     | sp Q9962 | 1 | 14 | 14 | 14 | 53  | 33.296 | 6808500000 | 7739000000 | 8491600000 | 8566700000  | 7989000000  | 7614400000 |
| sp Q9962 COPS8    | sp Q9962 | 1 | 5  | 5  | 5  | 41  | 23.225 | 790860000  | 1001400000 | 837520000  | 787810000   | 890800000   | 930800000  |
| sp Q9963 PRPF18   | sp Q9963 | 1 | 1  | 1  | 1  | 5.8 | 39.859 | 0          | 0          | 0          | 0           | 0           | 0          |
| sp Q9964 SDHC     | sp Q9964 | 1 | 2  | 2  | 2  | 12  | 18.61  | 153300000  | 167860000  | 159160000  | 170400000   | 170010000   | 173960000  |
| sp Q9965 CHP1     | sp Q9965 | 1 | 3  | 3  | 3  | 24  | 22.456 | 78204000   | 0          | 83750000   | 89902000    | 88641000    | 0          |
| sp Q9966 KIF2C    | sp Q9966 | 1 | 10 | 10 | 9  | 25  | 81.312 | 373750000  | 299430000  | 390130000  | 421600000   | 473230000   | 464180000  |
| sp Q9970 ATXN2    | sp Q9970 | 1 | 5  | 5  | 5  | 5   | 140.28 | 0          | 188170000  | 0          | 0           | 0           | 134710000  |

|                  |          |   |    |    |    |     |        |            |            |            |             |             |            |
|------------------|----------|---|----|----|----|-----|--------|------------|------------|------------|-------------|-------------|------------|
| sp Q9970 MTR     | sp Q9970 | 1 | 3  | 3  | 3  | 4   | 140.53 | 0          | 81586000   | 0          | 0           | 0           | 0          |
| sp Q9971 HSD17B1 | sp Q9971 | 1 | 15 | 15 | 15 | 79  | 26.923 | 6172800000 | 6468500000 | 6224700000 | 7035500000  | 7033900000  | 5760600000 |
| sp Q9971 COL12A1 | sp Q9971 | 1 | 15 | 15 | 15 | 7.5 | 333.14 | 498770000  | 615060000  | 554910000  | 396670000   | 328510000   | 440460000  |
| sp Q9972 SIGMAR1 | sp Q9972 | 1 | 3  | 3  | 3  | 24  | 25.127 | 658530000  | 520610000  | 597840000  | 564000000   | 650060000   | 557210000  |
| sp Q9972 HNRNPAB | sp Q9972 | 1 | 6  | 6  | 6  | 19  | 36.224 | 2636700000 | 2429900000 | 2651100000 | 2091200000  | 1931200000  | 1772300000 |
| sp Q9973 NAP1L4  | sp Q9973 | 1 | 13 | 13 | 12 | 46  | 42.823 | 3810400000 | 4811500000 | 3994900000 | 4108000000  | 4044000000  | 4180600000 |
| sp Q9973 MGST2   | sp Q9973 | 1 | 1  | 1  | 1  | 9.5 | 16.62  | 0          | 0          | 0          | 0           | 0           | 692700000  |
| sp Q9974 NAPG    | sp Q9974 | 1 | 5  | 5  | 5  | 21  | 34.746 | 191350000  | 216960000  | 219600000  | 223090000   | 209260000   | 0          |
| sp Q9975 TXN2    | sp Q9975 | 1 | 3  | 3  | 3  | 37  | 18.383 | 311640000  | 293510000  | 384380000  | 489720000   | 432460000   | 306100000  |
| sp Q9979 ACO2    | sp Q9979 | 1 | 24 | 24 | 24 | 43  | 85.424 | 2903400000 | 2827800000 | 3062500000 | 3343600000  | 3177800000  | 3422200000 |
| sp Q9980 TM9SF2  | sp Q9980 | 1 | 9  | 9  | 9  | 19  | 75.775 | 2330100000 | 2064200000 | 2296100000 | 2616300000  | 2685300000  | 2489800000 |
| sp Q9980 COQ7    | sp Q9980 | 1 | 1  | 1  | 1  | 8.3 | 24.277 | 0          | 0          | 0          | 0           | 0           | 30634000   |
| sp Q9980 SLC29A1 | sp Q9980 | 1 | 4  | 4  | 4  | 9.4 | 50.219 | 225840000  | 273410000  | 197040000  | 158970000   | 130380000   | 123090000  |
| sp Q9981 TSG101  | sp Q9981 | 1 | 6  | 6  | 6  | 23  | 43.944 | 316580000  | 280620000  | 199120000  | 252420000   | 477200000   | 304410000  |
| sp Q9982 CPNE1   | sp Q9982 | 1 | 9  | 9  | 9  | 21  | 59.058 | 903740000  | 913370000  | 924980000  | 966310000   | 878340000   | 800300000  |
| sp Q9983 CCT7    | sp Q9983 | 1 | 29 | 29 | 29 | 61  | 59.366 | 1.3389E+10 | 1.3546E+10 | 1.2675E+10 | 11845000000 | 12414000000 | 1.3665E+10 |
| sp Q9983 MYD88   | sp Q9983 | 1 | 2  | 2  | 2  | 13  | 33.233 | 0          | 0          | 0          | 0           | 0           | 88734000   |
| sp Q9984 EBNA1BP | sp Q9984 | 1 | 11 | 11 | 11 | 36  | 34.852 | 1684200000 | 1832100000 | 1771900000 | 1655900000  | 1778300000  | 1864600000 |
| sp Q9987 HAUS7   | sp Q9987 | 1 | 1  | 1  | 1  | 4.3 | 40.778 | 0          | 0          | 0          | 0           | 0           | 19146000   |
| sp Q9987 PRMT1   | sp Q9987 | 2 | 14 | 14 | 14 | 38  | 42.461 | 4500600000 | 4646100000 | 4885500000 | 4567400000  | 4752000000  | 5073000000 |
| sp Q9993 BAG1    | sp Q9993 | 1 | 5  | 5  | 5  | 16  | 38.778 | 532490000  | 373520000  | 450100000  | 422280000   | 536490000   | 423030000  |
| sp Q9994 ATF6B   | sp Q9994 | 1 | 1  | 1  | 1  | 2   | 76.708 | 0          | 0          | 0          | 0           | 0           | 2958000    |
| sp Q9994 RNF5    | sp Q9994 | 1 | 1  | 1  | 1  | 8.3 | 19.881 | 0          | 0          | 0          | 0           | 0           | 48053000   |
| sp Q9994 AGPAT1  | sp Q9994 | 1 | 1  | 1  | 1  | 7.4 | 31.716 | 14345000   | 0          | 24060000   | 42163000    | 29022000    | 44616000   |
| sp Q9996 SH3GL1  | sp Q9996 | 2 | 8  | 8  | 8  | 27  | 41.489 | 919280000  | 967310000  | 906480000  | 976760000   | 1152300000  | 1155400000 |
| sp Q9998 VRK1    | sp Q9998 | 1 | 6  | 6  | 6  | 23  | 45.476 | 158310000  | 0          | 0          | 0           | 160230000   | 175990000  |
| sp Q9BPV NIPSNAP | sp Q9BPV | 1 | 4  | 4  | 4  | 16  | 33.31  | 179720000  | 256290000  | 211850000  | 164610000   | 214640000   | 233580000  |
| sp Q9BPX NCAPG   | sp Q9BPX | 1 | 19 | 19 | 19 | 27  | 114.33 | 974840000  | 1099200000 | 1191400000 | 926810000   | 932450000   | 810830000  |
| sp Q9BPX ARPC5L  | sp Q9BPX | 1 | 4  | 3  | 3  | 46  | 16.941 | 519310000  | 536200000  | 0          | 366380000   | 646330000   | 475480000  |
| sp Q9BPX MICU1   | sp Q9BPX | 1 | 1  | 1  | 1  | 4.4 | 54.351 | 0          | 0          | 0          | 0           | 37346000    | 0          |
| sp Q9BPZ PAIP2   | sp Q9BPZ | 1 | 2  | 2  | 2  | 35  | 14.984 | 0          | 0          | 0          | 85620000    | 58433000    | 124810000  |
| sp Q9BPZ MAPKAP  | sp Q9BPZ | 1 | 1  | 1  | 1  | 3.3 | 59.122 | 0          | 0          | 41220000   | 0           | 0           | 0          |
| sp Q9BQ0 RBM4B   | sp Q9BQ0 | 1 | 11 | 1  | 1  | 30  | 40.149 | 0          | 0          | 0          | 0           | 0           | 31010000   |
| sp Q9BQ1 NABP2   | sp Q9BQ1 | 1 | 1  | 1  | 1  | 3.3 | 22.338 | 0          | 0          | 0          | 0           | 46198000    | 0          |
| sp Q9BQ3 DDX50   | sp Q9BQ3 | 1 | 8  | 6  | 6  | 16  | 82.564 | 129990000  | 143880000  | 168890000  | 143260000   | 160900000   | 137740000  |
| sp Q9BQ4 MRPL34  | sp Q9BQ4 | 1 | 1  | 1  | 1  | 11  | 10.165 | 0          | 0          | 0          | 0           | 61002000    | 0          |
| sp Q9BQ5 ELAC2   | sp Q9BQ5 | 1 | 23 | 23 | 23 | 43  | 92.218 | 1715200000 | 1793100000 | 1360300000 | 1520400000  | 1505200000  | 1812000000 |
| sp Q9BQ6 TRIR    | sp Q9BQ6 | 1 | 5  | 5  | 5  | 35  | 18.419 | 310300000  | 0          | 99237000   | 117880000   | 288260000   | 189670000  |
| sp Q9BQ6 GRWD1   | sp Q9BQ6 | 1 | 7  | 7  | 7  | 30  | 49.419 | 1151100000 | 1127900000 | 1123400000 | 1260500000  | 1245800000  | 1306400000 |

|          |         |          |   |    |    |    |     |        |            |            |            |             |             |            |
|----------|---------|----------|---|----|----|----|-----|--------|------------|------------|------------|-------------|-------------|------------|
| sp Q9BQ6 | MACROD  | sp Q9BQ6 | 1 | 3  | 3  | 3  | 15  | 35.505 | 221360000  | 297950000  | 269350000  | 333170000   | 291920000   | 315750000  |
| sp Q9BQ7 | TCF25   | sp Q9BQ7 | 1 | 3  | 3  | 3  | 5.5 | 76.666 | 345110000  | 0          | 0          | 0           | 311730000   | 0          |
| sp Q9BQ7 | CMSS1   | sp Q9BQ7 | 1 | 3  | 3  | 3  | 12  | 31.884 | 0          | 0          | 0          | 0           | 118990000   | 0          |
| sp Q9BQ9 | ECSIT   | sp Q9BQ9 | 1 | 3  | 3  | 3  | 14  | 49.148 | 49228000   | 60598000   | 0          | 83986000    | 68107000    | 0          |
| sp Q9BQA | WDR77   | sp Q9BQA | 1 | 9  | 9  | 9  | 45  | 36.724 | 1374200000 | 1758700000 | 1343700000 | 1458400000  | 1395600000  | 1543600000 |
| sp Q9BQE | VKORC1  | sp Q9BQE | 1 | 1  | 1  | 1  | 8   | 18.234 | 0          | 0          | 0          | 0           | 0           | 534910000  |
| sp Q9BQC | DPH2    | sp Q9BQC | 1 | 1  | 1  | 1  | 3.9 | 52.082 | 0          | 0          | 0          | 0           | 15078000    | 0          |
| sp Q9BQC | MRPL57  | sp Q9BQC | 1 | 2  | 2  | 2  | 30  | 12.266 | 291860000  | 413070000  | 142070000  | 431430000   | 937920000   | 778250000  |
| sp Q9BQL | KXD1    | sp Q9BQL | 1 | 1  | 1  | 1  | 8.5 | 19.668 | 0          | 0          | 0          | 0           | 0           | 17530000   |
| sp Q9BQE | TUBA1C  | sp Q9BQE | 1 | 21 | 21 | 4  | 61  | 49.895 | 1.0735E+11 | 1.0725E+11 | 1.0515E+11 | 98960000000 | 90018000000 | 1.0601E+11 |
| sp Q9BQE | SELENOS | sp Q9BQE | 1 | 1  | 1  | 1  | 9   | 21.163 | 0          | 0          | 0          | 0           | 0           | 0          |
| sp Q9BQE | APOL2   | sp Q9BQE | 1 | 4  | 4  | 4  | 14  | 37.092 | 188250000  | 220390000  | 201420000  | 190790000   | 232460000   | 85456000   |
| sp Q9BQC | MYBBP1A | sp Q9BQC | 1 | 31 | 31 | 31 | 27  | 148.85 | 4222200000 | 5015700000 | 4510600000 | 4068600000  | 4621900000  | 4784500000 |
| sp Q9BQL | FERMT1  | sp Q9BQL | 1 | 3  | 1  | 1  | 4.7 | 77.436 | 0          | 0          | 0          | 0           | 0           | 32959000   |
| sp Q9BQF | MGME1   | sp Q9BQF | 1 | 5  | 5  | 5  | 20  | 39.42  | 0          | 105470000  | 0          | 0           | 0           | 0          |
| sp Q9BQC | GORASP  | sp Q9BQC | 1 | 1  | 1  | 1  | 4.8 | 46.482 | 0          | 0          | 0          | 0           | 0           | 30551000   |
| sp Q9BR6 | ACBD6   | sp Q9BR6 | 1 | 3  | 3  | 3  | 15  | 31.15  | 0          | 0          | 0          | 0           | 0           | 84154000   |
| sp Q9BR7 | CORO1B  | sp Q9BR7 | 1 | 11 | 11 | 10 | 30  | 54.234 | 1347600000 | 1194900000 | 1202700000 | 1154800000  | 1017900000  | 1281100000 |
| sp Q9BRA | TXNDC17 | sp Q9BRA | 1 | 5  | 5  | 5  | 44  | 13.941 | 1451500000 | 1550700000 | 1666900000 | 1832900000  | 1539900000  | 1626100000 |
| sp Q9BRF | CPPED1  | sp Q9BRF | 1 | 2  | 2  | 2  | 12  | 35.548 | 0          | 0          | 122360000  | 0           | 0           | 0          |
| sp Q9BRG | VPS25   | sp Q9BRG | 1 | 2  | 2  | 2  | 17  | 20.747 | 0          | 152200000  | 0          | 0           | 0           | 0          |
| sp Q9BRJ | MRPL45  | sp Q9BRJ | 1 | 6  | 6  | 6  | 31  | 35.351 | 296580000  | 528050000  | 441850000  | 233440000   | 372800000   | 130970000  |
| sp Q9BRJ | C7orf50 | sp Q9BRJ | 1 | 7  | 7  | 7  | 46  | 22.083 | 1210400000 | 1169700000 | 1076000000 | 1151500000  | 1255200000  | 1413300000 |
| sp Q9BRJ | NUDT16L | sp Q9BRJ | 1 | 2  | 1  | 1  | 13  | 23.338 | 0          | 0          | 0          | 0           | 0           | 15380000   |
| sp Q9BRK | SDF4    | sp Q9BRK | 1 | 4  | 4  | 4  | 11  | 41.806 | 161450000  | 164920000  | 139680000  | 228150000   | 210060000   | 0          |
| sp Q9BRF | PYM1    | sp Q9BRF | 1 | 3  | 3  | 3  | 25  | 22.655 | 0          | 215380000  | 270980000  | 0           | 0           | 0          |
| sp Q9BRG | AIFM2   | sp Q9BRG | 1 | 4  | 4  | 4  | 13  | 40.526 | 363480000  | 297210000  | 251650000  | 328000000   | 391210000   | 398060000  |
| sp Q9BRF | ADPGK   | sp Q9BRF | 1 | 3  | 3  | 3  | 12  | 54.088 | 95153000   | 109190000  | 95537000   | 78090000    | 51454000    | 73762000   |
| sp Q9BR9 | RIOK1   | sp Q9BR9 | 1 | 1  | 1  | 1  | 3   | 65.582 | 0          | 0          | 0          | 0           | 0           | 32226000   |
| sp Q9BRT | UQCC2   | sp Q9BRT | 1 | 2  | 2  | 2  | 23  | 14.875 | 0          | 0          | 0          | 90032000    | 0           | 0          |
| sp Q9BRT | LLPH    | sp Q9BRT | 1 | 2  | 2  | 2  | 22  | 15.225 | 162110000  | 152970000  | 161700000  | 0           | 0           | 143670000  |
| sp Q9BRT | GINS4   | sp Q9BRT | 1 | 3  | 3  | 3  | 21  | 26.047 | 169440000  | 168330000  | 146170000  | 124050000   | 203840000   | 120770000  |
| sp Q9BRX | PELO    | sp Q9BRX | 1 | 9  | 9  | 9  | 28  | 43.359 | 530820000  | 755590000  | 588580000  | 575700000   | 636110000   | 529780000  |
| sp Q9BRX | GINS3   | sp Q9BRX | 1 | 2  | 2  | 2  | 16  | 24.534 | 0          | 0          | 0          | 0           | 58421000    | 0          |
| sp Q9BRX | FAM213A | sp Q9BRX | 1 | 1  | 1  | 1  | 4.8 | 25.764 | 0          | 0          | 0          | 0           | 0           | 37816000   |
| sp Q9BRZ | TRIM56  | sp Q9BRZ | 1 | 3  | 3  | 3  | 6.2 | 81.487 | 59129000   | 0          | 55945000   | 59083000    | 65990000    | 64389000   |
| sp Q9BS2 | ERP44   | sp Q9BS2 | 1 | 7  | 7  | 7  | 21  | 46.971 | 1836000000 | 2064900000 | 2051800000 | 2310500000  | 1858700000  | 1709700000 |
| sp Q9BS4 | LXN     | sp Q9BS4 | 1 | 2  | 2  | 2  | 12  | 25.75  | 261170000  | 90201000   | 220110000  | 325450000   | 308870000   | 323850000  |
| sp Q9BSC | NOL10   | sp Q9BSC | 1 | 8  | 8  | 8  | 22  | 80.301 | 246760000  | 273420000  | 397770000  | 292180000   | 396800000   | 294260000  |

|                  |          |   |    |    |    |     |        |            |            |            |            |            |            |
|------------------|----------|---|----|----|----|-----|--------|------------|------------|------------|------------|------------|------------|
| sp Q9BSL NTPCR   | sp Q9BSL | 1 | 7  | 7  | 7  | 48  | 20.713 | 498340000  | 507580000  | 401210000  | 602900000  | 526510000  | 515910000  |
| sp Q9BSE AGMAT   | sp Q9BSE | 1 | 1  | 1  | 1  | 8.5 | 37.66  | 0          | 0          | 0          | 0          | 0          | 104350000  |
| sp Q9BSF TIMM29  | sp Q9BSF | 1 | 1  | 1  | 1  | 6.5 | 29.233 | 0          | 0          | 0          | 18983000   | 0          | 0          |
| sp Q9BSH TACO1   | sp Q9BSH | 1 | 4  | 4  | 4  | 24  | 32.477 | 389340000  | 310070000  | 282030000  | 392860000  | 442140000  | 307330000  |
| sp Q9BSJ TUBGCP2 | sp Q9BSJ | 1 | 4  | 4  | 4  | 6.1 | 102.53 | 0          | 0          | 0          | 77448000   | 0          | 0          |
| sp Q9BSJ ESYT1   | sp Q9BSJ | 1 | 23 | 23 | 23 | 31  | 122.85 | 1929400000 | 2398700000 | 1981900000 | 2304200000 | 2387800000 | 2243700000 |
| sp Q9BSL UBAC1   | sp Q9BSL | 1 | 1  | 1  | 1  | 4.2 | 45.338 | 0          | 0          | 0          | 0          | 0          | 22459000   |
| sp Q9BSF YIPF4   | sp Q9BSF | 1 | 1  | 1  | 1  | 3.7 | 27.082 | 0          | 0          | 0          | 0          | 0          | 82659000   |
| sp Q9BSV TSEN34  | sp Q9BSV | 1 | 2  | 2  | 2  | 8.4 | 33.652 | 0          | 0          | 0          | 0          | 0          | 45056000   |
| sp Q9BT0 CNPY3   | sp Q9BT0 | 1 | 3  | 3  | 3  | 17  | 30.748 | 120090000  | 0          | 121930000  | 144280000  | 194280000  | 307180000  |
| sp Q9BT2 ALG1    | sp Q9BT2 | 2 | 6  | 6  | 6  | 18  | 52.518 | 445540000  | 393160000  | 326160000  | 401290000  | 376360000  | 363740000  |
| sp Q9BT7 PSMG3   | sp Q9BT7 | 1 | 4  | 4  | 4  | 51  | 13.104 | 203630000  | 164320000  | 200840000  | 333780000  | 239000000  | 255570000  |
| sp Q9BT7 COPS4   | sp Q9BT7 | 1 | 16 | 16 | 16 | 52  | 46.268 | 1452100000 | 1510600000 | 1529600000 | 1449600000 | 1434200000 | 1481800000 |
| sp Q9BTC DIDO1   | sp Q9BTC | 1 | 11 | 11 | 11 | 10  | 243.87 | 482480000  | 514540000  | 419290000  | 591660000  | 515770000  | 568960000  |
| sp Q9BTC MTA3    | sp Q9BTC | 1 | 5  | 2  | 2  | 9.8 | 67.503 | 89017000   | 44268000   | 0          | 0          | 58560000   | 106600000  |
| sp Q9BTD RBM42   | sp Q9BTD | 1 | 4  | 4  | 4  | 19  | 50.413 | 0          | 0          | 163270000  | 0          | 220650000  | 313190000  |
| sp Q9BTE DCTN5   | sp Q9BTE | 1 | 2  | 2  | 2  | 12  | 20.126 | 126420000  | 0          | 17950000   | 0          | 173850000  | 74214000   |
| sp Q9BTE MCMBP   | sp Q9BTE | 1 | 10 | 10 | 10 | 22  | 72.979 | 447960000  | 454820000  | 490290000  | 367780000  | 420720000  | 305080000  |
| sp Q9BTE AARSD1  | sp Q9BTE | 1 | 5  | 5  | 5  | 21  | 45.479 | 160260000  | 209630000  | 192860000  | 219070000  | 199690000  | 180110000  |
| sp Q9BTE DCUN1D5 | sp Q9BTE | 2 | 3  | 3  | 3  | 12  | 27.508 | 136490000  | 121000000  | 139540000  | 136280000  | 165320000  | 122820000  |
| sp Q9BTT ANP32E  | sp Q9BTT | 1 | 5  | 5  | 5  | 23  | 30.692 | 1729100000 | 1730400000 | 1803600000 | 1677600000 | 1469700000 | 1722700000 |
| sp Q9BTU PI4K2A  | sp Q9BTU | 1 | 2  | 2  | 2  | 4   | 54.022 | 0          | 0          | 0          | 26491000   | 0          | 0          |
| sp Q9BTV TMEM43  | sp Q9BTV | 1 | 14 | 14 | 14 | 51  | 44.875 | 1866600000 | 1808500000 | 1335100000 | 1804100000 | 1889400000 | 1577700000 |
| sp Q9BTV TBCD    | sp Q9BTV | 1 | 12 | 12 | 12 | 17  | 132.6  | 554050000  | 582260000  | 589360000  | 538220000  | 508000000  | 493570000  |
| sp Q9BTX NDC1    | sp Q9BTX | 1 | 8  | 8  | 8  | 20  | 76.304 | 185640000  | 197710000  | 359880000  | 378130000  | 432020000  | 378080000  |
| sp Q9BTY HGH1    | sp Q9BTY | 1 | 7  | 7  | 7  | 30  | 42.129 | 156610000  | 155470000  | 240670000  | 174770000  | 218970000  | 138440000  |
| sp Q9BTZ DHRS4   | sp Q9BTZ | 2 | 4  | 4  | 4  | 14  | 29.537 | 0          | 0          | 98832000   | 0          | 133710000  | 163090000  |
| sp Q9BU2 LMF2    | sp Q9BU2 | 1 | 1  | 1  | 1  | 3   | 79.697 | 0          | 0          | 0          | 0          | 0          | 0          |
| sp Q9BU6 NDUFAF3 | sp Q9BU6 | 1 | 2  | 2  | 2  | 13  | 20.35  | 0          | 0          | 0          | 0          | 0          | 120480000  |
| sp Q9BU7 MMTAG2  | sp Q9BU7 | 1 | 2  | 2  | 2  | 9.1 | 29.411 | 161740000  | 158090000  | 91806000   | 0          | 166590000  | 0          |
| sp Q9BU8 DOHH    | sp Q9BU8 | 1 | 5  | 5  | 5  | 29  | 32.904 | 175440000  | 161320000  | 127840000  | 176710000  | 214650000  | 236930000  |
| sp Q9BUE TMEM70  | sp Q9BUE | 1 | 2  | 2  | 2  | 8.8 | 28.969 | 0          | 0          | 0          | 0          | 0          | 26183000   |
| sp Q9BUE ISCA1   | sp Q9BUE | 1 | 1  | 1  | 1  | 10  | 14.179 | 0          | 0          | 0          | 0          | 0          | 42604000   |
| sp Q9BUF TUBB6   | sp Q9BUF | 1 | 22 | 14 | 9  | 73  | 49.857 | 3907400000 | 3719800000 | 4087700000 | 4761400000 | 3396300000 | 4009800000 |
| sp Q9BUH PAXX    | sp Q9BUH | 1 | 2  | 2  | 2  | 15  | 21.639 | 0          | 0          | 0          | 0          | 0          | 76421000   |
| sp Q9BUI POLR3C  | sp Q9BUI | 1 | 3  | 3  | 3  | 9.4 | 60.611 | 0          | 0          | 0          | 0          | 0          | 110390000  |
| sp Q9BUJ HNRNPU1 | sp Q9BUJ | 1 | 22 | 22 | 22 | 35  | 95.737 | 2448500000 | 1885100000 | 2522500000 | 2783700000 | 2931700000 | 2909200000 |
| sp Q9BUK MSTO1   | sp Q9BUK | 1 | 5  | 5  | 4  | 7.5 | 61.835 | 405240000  | 220370000  | 348370000  | 311230000  | 284300000  | 415750000  |
| sp Q9BUL PDCD10  | sp Q9BUL | 1 | 4  | 4  | 4  | 26  | 24.701 | 432870000  | 366630000  | 422810000  | 336800000  | 345670000  | 399640000  |

|           |         |           |   |    |    |    |     |        |            |            |            |            |            |            |
|-----------|---------|-----------|---|----|----|----|-----|--------|------------|------------|------------|------------|------------|------------|
| sp Q9BUL  | RPP25   | sp Q9BUL  | 1 | 2  | 2  | 2  | 22  | 20.632 | 0          | 0          | 0          | 0          | 0          | 51703000   |
| sp Q9BUN  | G6PC3   | sp Q9BUN  | 1 | 1  | 1  | 1  | 6.1 | 38.734 | 0          | 18420000   | 0          | 0          | 0          | 0          |
| sp Q9BUN  | DERL1   | sp Q9BUN  | 1 | 4  | 4  | 4  | 14  | 28.8   | 207410000  | 234440000  | 239330000  | 261640000  | 187170000  | 221760000  |
| sp Q9BUF  | HTATIP2 | sp Q9BUF  | 1 | 7  | 7  | 7  | 34  | 27.049 | 901900000  | 655130000  | 832840000  | 973720000  | 758060000  | 706070000  |
| sp Q9BUC  | DDX23   | sp Q9BUC  | 1 | 17 | 17 | 17 | 24  | 95.581 | 719480000  | 712570000  | 633560000  | 698360000  | 719990000  | 850630000  |
| sp Q9BUF  | WRAP53  | sp Q9BUF  | 1 | 7  | 7  | 7  | 24  | 59.309 | 195690000  | 232510000  | 195990000  | 122200000  | 222680000  | 186310000  |
| sp Q9BUF  | APOO    | sp Q9BUF  | 1 | 5  | 5  | 5  | 33  | 22.284 | 0          | 191060000  | 303350000  | 0          | 274930000  | 322900000  |
| sp Q9BV2  | MRI1    | sp Q9BV2  | 1 | 4  | 4  | 4  | 15  | 39.149 | 0          | 237230000  | 171730000  | 0          | 0          | 0          |
| sp Q9BV3  | WDR18   | sp Q9BV3  | 1 | 6  | 6  | 6  | 17  | 47.405 | 324030000  | 296170000  | 372960000  | 401850000  | 436820000  | 0          |
| sp Q9BV4  | VAMP8   | sp Q9BV4  | 1 | 2  | 2  | 2  | 18  | 11.438 | 0          | 0          | 0          | 0          | 0          | 322130000  |
| sp Q9BV4  | THUMPD  | sp Q9BV4  | 1 | 8  | 8  | 8  | 25  | 57.002 | 278410000  | 381790000  | 201520000  | 262980000  | 181360000  | 247320000  |
| sp Q9BV5  | ADI1    | sp Q9BV5  | 1 | 4  | 4  | 4  | 28  | 21.498 | 219470000  | 148790000  | 0          | 199340000  | 168750000  | 159170000  |
| sp Q9BV6  | RNF126  | sp Q9BV6  | 1 | 1  | 1  | 1  | 7.4 | 35.584 | 0          | 0          | 0          | 0          | 0          | 165020000  |
| sp Q9BV8  | EMC6    | sp Q9BV8  | 1 | 1  | 1  | 1  | 9.1 | 12.017 | 0          | 0          | 0          | 0          | 0          | 0          |
| sp Q9BV8  | NTMT1   | sp Q9BV8  | 1 | 8  | 8  | 8  | 50  | 25.387 | 500180000  | 846210000  | 618880000  | 585150000  | 785770000  | 629610000  |
| sp Q9BVC  | MLST8   | sp Q9BVC  | 1 | 3  | 3  | 3  | 19  | 35.876 | 200820000  | 174520000  | 142830000  | 178880000  | 162440000  | 0          |
| sp Q9BVC  | TMEM109 | sp Q9BVC  | 1 | 2  | 2  | 2  | 9.1 | 26.21  | 676170000  | 746430000  | 675280000  | 805200000  | 972780000  | 1072300000 |
| sp Q9BVC  | PBDC1   | sp Q9BVC  | 1 | 4  | 4  | 4  | 23  | 26.056 | 370520000  | 305300000  | 349640000  | 345260000  | 436910000  | 303780000  |
| sp Q9BVC  | PTDSS2  | sp Q9BVC  | 1 | 2  | 2  | 2  | 6.2 | 56.252 | 0          | 51668000   | 34812000   | 0          | 0          | 55348000   |
| sp Q9BVI4 | NOC4L   | sp Q9BVI4 | 1 | 7  | 7  | 7  | 17  | 58.467 | 268360000  | 350170000  | 283590000  | 296670000  | 364280000  | 316630000  |
| sp Q9BVJ  | UTP14A  | sp Q9BVJ  | 2 | 8  | 8  | 8  | 16  | 87.977 | 315640000  | 365230000  | 355540000  | 351640000  | 410140000  | 263510000  |
| sp Q9BVJ  | DUSP23  | sp Q9BVJ  | 1 | 3  | 3  | 3  | 26  | 16.588 | 71325000   | 0          | 0          | 0          | 0          | 0          |
| sp Q9BVK  | TMED9   | sp Q9BVK  | 1 | 8  | 8  | 7  | 35  | 27.277 | 1270200000 | 1036600000 | 907730000  | 1340600000 | 1088200000 | 629220000  |
| sp Q9BVL  | NUP58   | sp Q9BVL  | 1 | 3  | 3  | 3  | 8.3 | 60.896 | 0          | 0          | 243250000  | 0          | 0          | 0          |
| sp Q9BVL  | SELENO  | sp Q9BVL  | 1 | 1  | 1  | 1  | 1.8 | 73.488 | 0          | 0          | 0          | 0          | 0          | 0          |
| sp Q9BVF  | GNL3    | sp Q9BVF  | 1 | 17 | 17 | 17 | 38  | 61.992 | 1186700000 | 1338300000 | 1169100000 | 1508200000 | 1148700000 | 1249800000 |
| sp Q9BVC  | SPATA5L | sp Q9BVC  | 1 | 5  | 5  | 5  | 11  | 80.709 | 50775000   | 0          | 43374000   | 0          | 0          | 0          |
| sp Q9BVS  | RIOK2   | sp Q9BVS  | 1 | 2  | 2  | 2  | 5.8 | 63.282 | 0          | 0          | 0          | 38247000   | 29046000   | 0          |
| sp Q9BVT  | TMUB1   | sp Q9BVT  | 1 | 2  | 2  | 2  | 16  | 26.261 | 0          | 148880000  | 160070000  | 0          | 0          | 0          |
| sp Q9BW1  | KIFC1   | sp Q9BW1  | 1 | 7  | 7  | 7  | 13  | 73.747 | 294740000  | 334370000  | 293390000  | 427910000  | 366090000  | 352880000  |
| sp Q9BW2  | NUP85   | sp Q9BW2  | 1 | 10 | 10 | 10 | 23  | 75.019 | 941800000  | 1058700000 | 976070000  | 985640000  | 1085100000 | 1046500000 |
| sp Q9BW6  | ELOVL1  | sp Q9BW6  | 1 | 2  | 2  | 2  | 9.7 | 32.662 | 252910000  | 241420000  | 236010000  | 315210000  | 171110000  | 120370000  |
| sp Q9BW7  | HIRIP3  | sp Q9BW7  | 1 | 2  | 2  | 2  | 5.4 | 61.956 | 0          | 0          | 0          | 0          | 93096000   | 0          |
| sp Q9BW7  | HIGD2A  | sp Q9BW7  | 1 | 1  | 1  | 1  | 27  | 11.528 | 637470000  | 166170000  | 197280000  | 866270000  | 605850000  | 0          |
| sp Q9BW9  | NUDT9   | sp Q9BW9  | 1 | 3  | 3  | 3  | 11  | 39.125 | 173890000  | 113320000  | 134550000  | 113190000  | 144610000  | 109460000  |
| sp Q9BW9  | TARS2   | sp Q9BW9  | 1 | 4  | 4  | 4  | 9.5 | 81.035 | 0          | 68290000   | 0          | 0          | 0          | 0          |
| sp Q9BWI  | ACAT2   | sp Q9BWI  | 1 | 13 | 13 | 13 | 57  | 41.35  | 3430000000 | 2798500000 | 2570200000 | 2876100000 | 2937800000 | 2580600000 |
| sp Q9BWI  | RBM4    | sp Q9BWI  | 1 | 13 | 13 | 3  | 41  | 40.313 | 1640400000 | 1344400000 | 1451800000 | 1446200000 | 1478900000 | 1594000000 |
| sp Q9BWI  | FUNDC2  | sp Q9BWI  | 1 | 2  | 2  | 2  | 13  | 20.675 | 0          | 0          | 0          | 0          | 872150000  | 0          |



|                  |          |   |    |    |    |     |        |            |            |            |            |            |            |
|------------------|----------|---|----|----|----|-----|--------|------------|------------|------------|------------|------------|------------|
| sp Q9BWJ SF3B5   | sp Q9BWJ | 1 | 4  | 4  | 4  | 56  | 10.135 | 1711000000 | 1530200000 | 1263900000 | 1256200000 | 1494400000 | 1696900000 |
| sp Q9BWJ SFXN3   | sp Q9BWJ | 1 | 10 | 9  | 9  | 42  | 35.503 | 924200000  | 922550000  | 813410000  | 1100600000 | 1305200000 | 1151900000 |
| sp Q9BWJ YIPF2   | sp Q9BWJ | 1 | 1  | 1  | 1  | 9.2 | 35.151 | 0          | 0          | 0          | 0          | 0          | 33804000   |
| sp Q9BWJ SLC4A1A | sp Q9BWJ | 1 | 3  | 3  | 3  | 5.9 | 88.813 | 0          | 0          | 0          | 146510000  | 0          | 0          |
| sp Q9BX4 LSM14B  | sp Q9BX4 | 1 | 5  | 5  | 5  | 27  | 42.07  | 122130000  | 134400000  | 100500000  | 0          | 161520000  | 167360000  |
| sp Q9BX6 SORBS1  | sp Q9BX6 | 1 | 1  | 1  | 1  | 0.8 | 142.51 | 0          | 190950000  | 527140000  | 223660000  | 0          | 0          |
| sp Q9BX6 HINT2   | sp Q9BX6 | 1 | 6  | 6  | 6  | 52  | 17.162 | 818640000  | 894980000  | 1060000000 | 1207200000 | 1232500000 | 985130000  |
| sp Q9BXE OSBPL11 | sp Q9BXE | 1 | 3  | 2  | 2  | 5.1 | 83.642 | 60256000   | 67684000   | 61077000   | 52921000   | 26748000   | 64086000   |
| sp Q9BXE OSBPL10 | sp Q9BXE | 1 | 5  | 5  | 4  | 8.5 | 83.969 | 213050000  | 350840000  | 312830000  | 228040000  | 206600000  | 254090000  |
| sp Q9BXJ NAA15   | sp Q9BXJ | 2 | 21 | 21 | 21 | 32  | 101.27 | 2519600000 | 2810800000 | 2441100000 | 2167300000 | 2283500000 | 2587900000 |
| sp Q9BXK BCL2L13 | sp Q9BXK | 1 | 4  | 4  | 4  | 16  | 52.723 | 0          | 160580000  | 146380000  | 0          | 123260000  | 0          |
| sp Q9BXF SRRT    | sp Q9BXF | 1 | 19 | 19 | 19 | 26  | 100.67 | 2827000000 | 3080900000 | 3110000000 | 3335800000 | 3261800000 | 2870200000 |
| sp Q9BXF QTRT1   | sp Q9BXF | 1 | 4  | 4  | 4  | 17  | 44.047 | 0          | 75456000   | 0          | 0          | 0          | 0          |
| sp Q9BXS AP1M1   | sp Q9BXS | 2 | 13 | 13 | 13 | 40  | 48.586 | 615250000  | 806100000  | 752500000  | 718630000  | 724050000  | 699370000  |
| sp Q9BXS NUSAP1  | sp Q9BXS | 1 | 3  | 3  | 3  | 8.2 | 49.451 | 0          | 145740000  | 0          | 0          | 0          | 90790000   |
| sp Q9BXT CACNG6  | sp Q9BXT | 1 | 1  | 1  | 1  | 2.7 | 28.129 | 0          | 0          | 0          | 0          | 0          | 383660000  |
| sp Q9BXL STK31   | sp Q9BXL | 1 | 1  | 1  | 1  | 0.8 | 115.69 | 0          | 0          | 0          | 0          | 0          | 30467000   |
| sp Q9BXV GON7    | sp Q9BXV | 1 | 2  | 2  | 2  | 41  | 10.859 | 0          | 0          | 0          | 0          | 136730000  | 0          |
| sp Q9BXV HDHD5   | sp Q9BXV | 1 | 5  | 5  | 5  | 19  | 46.321 | 160410000  | 282940000  | 158860000  | 174270000  | 178100000  | 139810000  |
| sp Q9BXV FANCD2  | sp Q9BXV | 1 | 6  | 6  | 6  | 5.7 | 164.13 | 0          | 392140000  | 346940000  | 0          | 188000000  | 0          |
| sp Q9BXY MAK16   | sp Q9BXY | 1 | 4  | 4  | 4  | 19  | 35.368 | 248310000  | 206100000  | 226040000  | 180830000  | 193990000  | 241710000  |
| sp Q9BY3 ITPA    | sp Q9BY3 | 1 | 5  | 5  | 5  | 44  | 21.445 | 585050000  | 537560000  | 472520000  | 412780000  | 563960000  | 528090000  |
| sp Q9BY4 RTFDC1  | sp Q9BY4 | 1 | 2  | 2  | 2  | 9.5 | 33.886 | 92449000   | 60653000   | 135080000  | 102160000  | 0          | 75735000   |
| sp Q9BY4 CHMP4A  | sp Q9BY4 | 1 | 6  | 6  | 6  | 42  | 25.098 | 245810000  | 445100000  | 216030000  | 343260000  | 330960000  | 381540000  |
| sp Q9BY4 EIF2A   | sp Q9BY4 | 1 | 19 | 19 | 19 | 45  | 64.989 | 2462500000 | 2416200000 | 2489000000 | 2042900000 | 1910800000 | 2091300000 |
| sp Q9BY7 POLDIP3 | sp Q9BY7 | 1 | 7  | 7  | 7  | 23  | 46.089 | 935440000  | 953700000  | 819040000  | 1052600000 | 1141400000 | 683770000  |
| sp Q9BYC MRPL32  | sp Q9BYC | 1 | 2  | 2  | 2  | 12  | 21.405 | 0          | 36842000   | 0          | 0          | 0          | 0          |
| sp Q9BYC MRPL20  | sp Q9BYC | 1 | 3  | 3  | 3  | 26  | 17.442 | 0          | 140130000  | 0          | 0          | 0          | 228060000  |
| sp Q9BYD MRPL13  | sp Q9BYD | 1 | 8  | 8  | 8  | 48  | 20.692 | 399500000  | 382780000  | 349710000  | 335220000  | 359650000  | 343600000  |
| sp Q9BYD MRPL9   | sp Q9BYD | 1 | 5  | 5  | 5  | 24  | 30.243 | 327420000  | 305720000  | 302450000  | 273670000  | 349810000  | 368010000  |
| sp Q9BYD MRPL4   | sp Q9BYD | 1 | 7  | 7  | 7  | 42  | 34.919 | 545710000  | 741530000  | 732890000  | 575760000  | 492390000  | 443940000  |
| sp Q9BYD MRPL1   | sp Q9BYD | 1 | 4  | 4  | 4  | 23  | 36.908 | 273580000  | 264160000  | 328470000  | 519150000  | 509230000  | 492230000  |
| sp Q9BYG NIFK    | sp Q9BYG | 1 | 9  | 9  | 9  | 44  | 34.222 | 977630000  | 909920000  | 911800000  | 1041500000 | 1084600000 | 1189100000 |
| sp Q9BYJ YTHDF1  | sp Q9BYJ | 1 | 7  | 2  | 2  | 14  | 60.873 | 58860000   | 0          | 0          | 70944000   | 84144000   | 75007000   |
| sp Q9BYN SRXN1   | sp Q9BYN | 1 | 3  | 3  | 3  | 34  | 14.259 | 134540000  | 121540000  | 128810000  | 137560000  | 196810000  | 126890000  |
| sp Q9BYN MRPS26  | sp Q9BYN | 1 | 3  | 3  | 3  | 15  | 24.211 | 0          | 253260000  | 250440000  | 0          | 223750000  | 324020000  |
| sp Q9BYT NLN     | sp Q9BYT | 1 | 11 | 11 | 11 | 19  | 80.651 | 640800000  | 582600000  | 489660000  | 608670000  | 598750000  | 474650000  |
| sp Q9BYX TBC1D2  | sp Q9BYX | 1 | 5  | 5  | 5  | 9.6 | 105.41 | 490130000  | 657640000  | 373830000  | 540630000  | 583350000  | 683150000  |
| sp Q9BZD NUF2    | sp Q9BZD | 1 | 2  | 2  | 2  | 3.9 | 54.303 | 0          | 0          | 42896000   | 0          | 0          | 0          |

|                   |          |   |    |    |    |     |        |            |            |            |            |            |            |
|-------------------|----------|---|----|----|----|-----|--------|------------|------------|------------|------------|------------|------------|
| sp Q9BZE MRPL37   | sp Q9BZE | 1 | 8  | 8  | 8  | 28  | 48.117 | 540060000  | 711140000  | 571630000  | 572320000  | 636400000  | 739490000  |
| sp Q9BZE GTPBP4   | sp Q9BZE | 1 | 19 | 19 | 19 | 38  | 73.964 | 2163900000 | 2145600000 | 2113800000 | 2683300000 | 2195400000 | 2406900000 |
| sp Q9BZF OSBPL8   | sp Q9BZF | 1 | 7  | 7  | 7  | 12  | 101.19 | 212710000  | 169100000  | 201070000  | 182600000  | 154340000  | 202620000  |
| sp Q9BZG RAB34    | sp Q9BZG | 1 | 3  | 3  | 3  | 13  | 29.044 | 172850000  | 192810000  | 198330000  | 179410000  | 214230000  | 158590000  |
| sp Q9BZH WDR11    | sp Q9BZH | 1 | 3  | 3  | 3  | 3.5 | 136.68 | 0          | 58859000   | 0          | 82249000   | 58515000   | 0          |
| sp Q9BZI UPF3B    | sp Q9BZI | 1 | 5  | 5  | 5  | 15  | 57.761 | 204010000  | 164430000  | 209040000  | 192070000  | 164270000  | 204240000  |
| sp Q9BZJ CRNKL1   | sp Q9BZJ | 1 | 4  | 4  | 4  | 5.7 | 100.45 | 0          | 133530000  | 109590000  | 168230000  | 0          | 128680000  |
| sp Q9BZK TBL1XR1  | sp Q9BZK | 1 | 10 | 10 | 4  | 33  | 55.594 | 601920000  | 693860000  | 483630000  | 430530000  | 545400000  | 489640000  |
| sp Q9BZL UBL5     | sp Q9BZL | 1 | 1  | 1  | 1  | 15  | 8.5468 | 0          | 0          | 0          | 0          | 20720000   | 0          |
| sp Q9BZV UBXN6    | sp Q9BZV | 1 | 4  | 4  | 4  | 18  | 49.753 | 66927000   | 113140000  | 77947000   | 100580000  | 152110000  | 73598000   |
| sp Q9BZX UCK2     | sp Q9BZX | 1 | 3  | 3  | 3  | 17  | 29.299 | 0          | 187300000  | 239290000  | 307310000  | 302560000  | 286160000  |
| sp Q9BZZ API5     | sp Q9BZZ | 1 | 8  | 8  | 8  | 17  | 59.004 | 1367900000 | 1349600000 | 896800000  | 1134000000 | 1295800000 | 1127000000 |
| sp Q9C00 DPY30    | sp Q9C00 | 1 | 2  | 2  | 2  | 38  | 11.25  | 215020000  | 249820000  | 0          | 162620000  | 233670000  | 186110000  |
| sp Q9C0B FTO      | sp Q9C0B | 1 | 7  | 7  | 7  | 20  | 58.281 | 159480000  | 166650000  | 217430000  | 114800000  | 98828000   | 139630000  |
| sp Q9C0B ZDHC5    | sp Q9C0B | 1 | 1  | 1  | 1  | 2.2 | 77.544 | 0          | 0          | 0          | 0          | 0          | 43864000   |
| sp Q9C0B TANGO6   | sp Q9C0B | 1 | 1  | 1  | 1  | 1.6 | 120.75 | 0          | 0          | 0          | 11575000   | 0          | 0          |
| sp Q9C0C TNKS1BP  | sp Q9C0C | 1 | 28 | 28 | 28 | 28  | 181.79 | 1052900000 | 1093400000 | 970610000  | 1123800000 | 1115200000 | 957140000  |
| sp Q9C0C UBE2O    | sp Q9C0C | 1 | 7  | 7  | 7  | 9.1 | 141.29 | 202950000  | 333450000  | 245520000  | 184480000  | 232490000  | 218680000  |
| sp Q9C0D SELENOI  | sp Q9C0D | 1 | 1  | 1  | 1  | 4   | 45.228 | 0          | 0          | 0          | 0          | 0          | 137030000  |
| sp Q9C0E XPO4     | sp Q9C0E | 1 | 3  | 3  | 3  | 4.1 | 130.14 | 129080000  | 101800000  | 106390000  | 100230000  | 0          | 76398000   |
| sp Q9C0E LNPK     | sp Q9C0E | 1 | 3  | 3  | 3  | 7.9 | 47.739 | 117590000  | 99308000   | 75839000   | 0          | 0          | 0          |
| sp Q9C0I MTMR12   | sp Q9C0I | 1 | 4  | 4  | 4  | 7.9 | 86.147 | 0          | 0          | 0          | 70059000   | 0          | 0          |
| sp Q9C0J WDR33    | sp Q9C0J | 1 | 4  | 4  | 4  | 6.6 | 145.89 | 83521000   | 77858000   | 74551000   | 79535000   | 90640000   | 69532000   |
| sp Q9GZL WDR12    | sp Q9GZL | 1 | 13 | 13 | 13 | 42  | 47.707 | 1758400000 | 1829200000 | 1755900000 | 1809400000 | 1782800000 | 1663900000 |
| sp Q9GZN YIPF3    | sp Q9GZN | 1 | 1  | 1  | 1  | 2.6 | 38.247 | 0          | 0          | 0          | 0          | 0          | 54964000   |
| sp Q9NXF NDE1     | sp Q9NXF | 2 | 1  | 1  | 1  | 3.3 | 37.72  | 0          | 0          | 0          | 0          | 0          | 0          |
| sp Q9GZN C20orf27 | sp Q9GZN | 1 | 2  | 2  | 2  | 19  | 19.291 | 0          | 0          | 138240000  | 137700000  | 0          | 125800000  |
| sp Q9GZF PITHD1   | sp Q9GZF | 1 | 6  | 6  | 6  | 41  | 24.178 | 273430000  | 108690000  | 109960000  | 287130000  | 293210000  | 183670000  |
| sp Q9GZF IMUP     | sp Q9GZF | 1 | 1  | 1  | 1  | 26  | 10.897 | 0          | 397760000  | 396420000  | 0          | 0          | 0          |
| sp Q9GZF DERL2    | sp Q9GZF | 2 | 4  | 4  | 4  | 21  | 27.567 | 114810000  | 128120000  | 0          | 87845000   | 146770000  | 89829000   |
| sp Q9GZF REXO4    | sp Q9GZF | 1 | 4  | 4  | 4  | 13  | 46.671 | 186060000  | 176860000  | 155600000  | 310110000  | 213930000  | 239090000  |
| sp Q9GZF DDX24    | sp Q9GZF | 1 | 11 | 11 | 11 | 19  | 96.331 | 459610000  | 294430000  | 388100000  | 473340000  | 413200000  | 345890000  |
| sp Q9GZS POLR1E   | sp Q9GZS | 1 | 2  | 2  | 2  | 7.3 | 53.961 | 223380000  | 146290000  | 207040000  | 204300000  | 217230000  | 204580000  |
| sp Q9GZS WDR61    | sp Q9GZS | 1 | 10 | 10 | 10 | 44  | 33.58  | 1323700000 | 1079800000 | 1035200000 | 1137700000 | 1327000000 | 1197900000 |
| sp Q9GZT SLIRP    | sp Q9GZT | 1 | 3  | 3  | 3  | 30  | 12.349 | 763390000  | 901200000  | 676230000  | 751380000  | 729040000  | 765510000  |
| sp Q9GZT NIF3L1   | sp Q9GZT | 1 | 8  | 8  | 8  | 29  | 41.968 | 544800000  | 426160000  | 551840000  | 535210000  | 271570000  | 349670000  |
| sp Q9GZL FAM192A  | sp Q9GZL | 1 | 3  | 3  | 3  | 16  | 28.912 | 0          | 172960000  | 0          | 0          | 0          | 0          |
| sp Q9GZY MFF      | sp Q9GZY | 1 | 8  | 8  | 8  | 30  | 38.464 | 687530000  | 718320000  | 440800000  | 700720000  | 462240000  | 642050000  |
| sp Q9GZZ NAA50    | sp Q9GZZ | 1 | 10 | 10 | 10 | 56  | 19.398 | 1644100000 | 1592000000 | 1152800000 | 1392700000 | 1482700000 | 1248600000 |

|                   |          |   |    |    |    |     |        |            |            |            |            |            |            |
|-------------------|----------|---|----|----|----|-----|--------|------------|------------|------------|------------|------------|------------|
| sp Q9GZZ UBA5     | sp Q9GZZ | 1 | 4  | 4  | 4  | 17  | 44.863 | 0          | 247850000  | 132420000  | 215980000  | 178950000  | 0          |
| sp Q9H01 MTFR1L   | sp Q9H01 | 1 | 2  | 2  | 2  | 13  | 31.957 | 0          | 0          | 0          | 0          | 0          | 31861000   |
| sp Q9H06 TMEM126  | sp Q9H06 | 1 | 2  | 2  | 2  | 21  | 21.527 | 0          | 67143000   | 0          | 88372000   | 120770000  | 93958000   |
| sp Q9H06 MAF1     | sp Q9H06 | 1 | 1  | 1  | 1  | 5.1 | 28.77  | 0          | 0          | 0          | 20371000   | 0          | 0          |
| sp Q9H07 PAIP1    | sp Q9H07 | 1 | 12 | 12 | 12 | 32  | 53.524 | 1846200000 | 1736400000 | 1383900000 | 1508200000 | 1866900000 | 1419100000 |
| sp Q9H07 CLPB     | sp Q9H07 | 1 | 9  | 9  | 9  | 18  | 78.728 | 288680000  | 386720000  | 289350000  | 222670000  | 247080000  | 344840000  |
| sp Q9H08 LSG1     | sp Q9H08 | 1 | 7  | 7  | 7  | 16  | 75.225 | 97505000   | 161260000  | 96732000   | 0          | 114840000  | 150160000  |
| sp Q9H09 FAM107B  | sp Q9H09 | 1 | 3  | 3  | 3  | 33  | 15.558 | 390150000  | 421000000  | 341920000  | 326330000  | 396760000  | 305340000  |
| sp Q9H0A NAT10    | sp Q9H0A | 1 | 24 | 24 | 24 | 31  | 115.73 | 2288300000 | 2441600000 | 2151300000 | 2779900000 | 2180100000 | 2050600000 |
| sp Q9H0A COMMD4   | sp Q9H0A | 1 | 3  | 3  | 3  | 26  | 21.764 | 114190000  | 137290000  | 142160000  | 117070000  | 0          | 113420000  |
| sp Q9H0B KLC2     | sp Q9H0B | 1 | 9  | 7  | 7  | 18  | 68.934 | 290010000  | 396730000  | 324260000  | 362040000  | 383690000  | 370270000  |
| sp Q9H0C ILKAP    | sp Q9H0C | 1 | 8  | 8  | 8  | 23  | 42.906 | 225920000  | 178170000  | 271060000  | 232550000  | 279850000  | 374590000  |
| sp Q9H0D XRN2     | sp Q9H0D | 1 | 12 | 12 | 12 | 18  | 108.58 | 583660000  | 731660000  | 667920000  | 611340000  | 519810000  | 606380000  |
| sp Q9H0E TOLLIP   | sp Q9H0E | 1 | 1  | 1  | 1  | 5.1 | 30.281 | 0          | 0          | 0          | 0          | 19913000   | 0          |
| sp Q9H0E SAP130   | sp Q9H0E | 1 | 1  | 1  | 1  | 1.1 | 110.32 | 0          | 0          | 0          | 0          | 11547000   | 0          |
| sp Q9H0F ARL6     | sp Q9H0F | 1 | 1  | 1  | 1  | 10  | 21.097 | 0          | 0          | 0          | 0          | 0          | 0          |
| sp Q9H0G NSRP1    | sp Q9H0G | 1 | 1  | 1  | 1  | 2.5 | 66.389 | 0          | 0          | 0          | 0          | 0          | 35848000   |
| sp Q9H0H RACGAP   | sp Q9H0H | 1 | 8  | 8  | 8  | 22  | 71.026 | 273240000  | 382120000  | 275890000  | 228700000  | 187380000  | 213410000  |
| sp Q9H0J PARP12   | sp Q9H0J | 1 | 2  | 2  | 2  | 6.3 | 79.063 | 0          | 0          | 31001000   | 39229000   | 0          | 0          |
| sp Q9H0L CSTF2T   | sp Q9H0L | 1 | 8  | 3  | 3  | 21  | 64.436 | 110790000  | 0          | 0          | 100990000  | 84368000   | 98017000   |
| sp Q9H0P NT5C3A   | sp Q9H0P | 1 | 6  | 6  | 6  | 21  | 37.948 | 254430000  | 264780000  | 230840000  | 278170000  | 314580000  | 248140000  |
| sp Q9H0R TMEM222  | sp Q9H0R | 1 | 2  | 2  | 2  | 21  | 23.23  | 70541000   | 79265000   | 0          | 66923000   | 79543000   | 60871000   |
| sp Q9H0S DDX47    | sp Q9H0S | 1 | 11 | 11 | 11 | 35  | 50.646 | 989920000  | 1009800000 | 934980000  | 643460000  | 1063500000 | 1018500000 |
| sp Q9H0U MAGT1    | sp Q9H0U | 1 | 9  | 9  | 9  | 24  | 38.036 | 739150000  | 1087900000 | 910670000  | 675040000  | 988230000  | 763380000  |
| sp Q9H0U RAB1B    | sp Q9H0U | 2 | 10 | 9  | 5  | 69  | 22.171 | 2780500000 | 3131300000 | 2655800000 | 3140200000 | 3867100000 | 2662800000 |
| sp Q9H0U MRPL18   | sp Q9H0U | 1 | 3  | 3  | 3  | 18  | 20.576 | 0          | 0          | 0          | 202150000  | 0          | 0          |
| sp Q9H0U TSPYL1   | sp Q9H0U | 1 | 1  | 1  | 1  | 4.6 | 49.192 | 0          | 0          | 0          | 0          | 0          | 37207000   |
| sp Q9H0V C11orf54 | sp Q9H0V | 1 | 3  | 3  | 3  | 17  | 35.117 | 0          | 0          | 0          | 0          | 121200000  | 0          |
| sp Q9H17 SIL1     | sp Q9H17 | 1 | 1  | 1  | 1  | 2.6 | 52.084 | 0          | 0          | 0          | 0          | 0          | 11185000   |
| sp Q9H1A ANAPC1   | sp Q9H1A | 1 | 3  | 3  | 3  | 1.9 | 216.5  | 0          | 0          | 0          | 0          | 0          | 43244000   |
| sp Q9H1B IRF2BPL  | sp Q9H1B | 1 | 7  | 4  | 4  | 11  | 82.658 | 152600000  | 231010000  | 0          | 156270000  | 141780000  | 0          |
| sp Q9H1C CYSTM1   | sp Q9H1C | 1 | 1  | 1  | 1  | 10  | 10.631 | 0          | 0          | 0          | 0          | 0          | 65510000   |
| sp Q9H1E NUCKS1   | sp Q9H1E | 1 | 5  | 5  | 5  | 28  | 27.296 | 1010500000 | 1072000000 | 1281100000 | 972700000  | 1028500000 | 1014900000 |
| sp Q9H1I ASCC2    | sp Q9H1I | 1 | 5  | 5  | 5  | 12  | 86.359 | 142340000  | 117290000  | 320210000  | 156010000  | 112390000  | 141370000  |
| sp Q9H1K ISCU     | sp Q9H1K | 1 | 2  | 2  | 2  | 22  | 17.999 | 0          | 0          | 0          | 0          | 0          | 96112000   |
| sp Q9H1Y ATG5     | sp Q9H1Y | 1 | 1  | 1  | 1  | 5.5 | 32.447 | 0          | 0          | 0          | 0          | 0          | 49660000   |
| sp Q9H22 EHD4     | sp Q9H22 | 1 | 12 | 11 | 10 | 31  | 61.174 | 674840000  | 531690000  | 460300000  | 582960000  | 599250000  | 502000000  |
| sp Q9H26 VPS33B   | sp Q9H26 | 1 | 3  | 3  | 3  | 8.1 | 70.584 | 60523000   | 0          | 91810000   | 0          | 0          | 0          |
| sp Q9H29 SH3BGR   | sp Q9H29 | 1 | 4  | 4  | 4  | 67  | 10.438 | 2057000000 | 2978100000 | 2126400000 | 1414600000 | 2849300000 | 1732100000 |

|                  |          |   |    |    |    |     |        |            |            |            |            |            |            |
|------------------|----------|---|----|----|----|-----|--------|------------|------------|------------|------------|------------|------------|
| sp Q9H2G SLK     | sp Q9H2G | 1 | 13 | 13 | 13 | 15  | 142.69 | 450500000  | 518840000  | 220880000  | 297360000  | 354030000  | 436000000  |
| sp Q9H2H PPIL3   | sp Q9H2H | 1 | 5  | 5  | 5  | 40  | 18.154 | 377200000  | 367720000  | 295870000  | 360600000  | 547010000  | 478840000  |
| sp Q9H2J PDCL3   | sp Q9H2J | 1 | 4  | 4  | 4  | 26  | 27.614 | 142300000  | 113620000  | 132880000  | 121550000  | 114200000  | 132050000  |
| sp Q9H2M RAB3GAF | sp Q9H2M | 1 | 12 | 12 | 12 | 12  | 155.98 | 349300000  | 576150000  | 279720000  | 514000000  | 382240000  | 482890000  |
| sp Q9H2P ADNP    | sp Q9H2P | 1 | 9  | 9  | 9  | 13  | 123.56 | 598150000  | 602790000  | 600200000  | 632680000  | 485220000  | 580480000  |
| sp Q9H2U DHX36   | sp Q9H2U | 1 | 13 | 13 | 13 | 20  | 114.76 | 661010000  | 636880000  | 639800000  | 501820000  | 441360000  | 519220000  |
| sp Q9H2U PPA2    | sp Q9H2U | 1 | 11 | 11 | 11 | 41  | 37.92  | 1346400000 | 1555100000 | 1392600000 | 1327900000 | 1622100000 | 1635400000 |
| sp Q9H2V SPNS1   | sp Q9H2V | 1 | 2  | 2  | 2  | 5.9 | 56.629 | 0          | 0          | 0          | 0          | 0          | 26313000   |
| sp Q9H2V MRPL46  | sp Q9H2V | 1 | 5  | 5  | 5  | 24  | 31.705 | 344470000  | 338780000  | 354540000  | 266470000  | 396270000  | 387460000  |
| sp Q9H30 PNN     | sp Q9H30 | 1 | 11 | 11 | 11 | 19  | 81.627 | 1550600000 | 1252000000 | 1419600000 | 1157700000 | 1621000000 | 1448100000 |
| sp Q9H33 TMEM245 | sp Q9H33 | 1 | 3  | 3  | 3  | 4.7 | 97.356 | 76556000   | 367140000  | 110220000  | 115030000  | 0          | 0          |
| sp Q9H3K GHITM   | sp Q9H3K | 1 | 3  | 3  | 3  | 6.7 | 37.205 | 383060000  | 290450000  | 245840000  | 0          | 0          | 309890000  |
| sp Q9H3K BOLA2   | sp Q9H3K | 1 | 6  | 6  | 6  | 80  | 10.116 | 2241000000 | 2237600000 | 2136600000 | 2125200000 | 2139400000 | 2245800000 |
| sp Q9H3N TMX1    | sp Q9H3N | 1 | 7  | 7  | 7  | 24  | 31.791 | 696460000  | 737910000  | 715000000  | 881280000  | 738840000  | 722780000  |
| sp Q9H3P NELFA   | sp Q9H3P | 1 | 8  | 8  | 8  | 28  | 57.276 | 181410000  | 467080000  | 0          | 201560000  | 278370000  | 266900000  |
| sp Q9H3P ACBD3   | sp Q9H3P | 1 | 10 | 10 | 10 | 28  | 60.593 | 725040000  | 848830000  | 527780000  | 779310000  | 930320000  | 705640000  |
| sp Q9H3Q CDC42EP | sp Q9H3Q | 1 | 5  | 5  | 5  | 27  | 37.979 | 165970000  | 142310000  | 0          | 0          | 123320000  | 115410000  |
| sp Q9H3R CENPH   | sp Q9H3R | 1 | 2  | 2  | 2  | 12  | 28.481 | 0          | 64141000   | 0          | 0          | 0          | 0          |
| sp Q9H3S PTPN23  | sp Q9H3S | 1 | 10 | 10 | 10 | 10  | 178.97 | 305070000  | 328170000  | 224590000  | 299350000  | 292930000  | 305300000  |
| sp Q9H3U UNC45A  | sp Q9H3U | 1 | 20 | 20 | 20 | 28  | 103.08 | 1403200000 | 1396100000 | 1218800000 | 1355600000 | 1316200000 | 1241400000 |
| sp Q9H3Y PPDPF   | sp Q9H3Y | 1 | 1  | 1  | 1  | 15  | 11.777 | 0          | 0          | 0          | 0          | 18689000   | 0          |
| sp Q9H3Z DNAJC5  | sp Q9H3Z | 1 | 2  | 2  | 2  | 20  | 22.149 | 0          | 0          | 44469000   | 0          | 0          | 0          |
| sp Q9H41 DSN1    | sp Q9H41 | 1 | 2  | 2  | 2  | 8.7 | 40.067 | 31205000   | 104890000  | 0          | 54080000   | 0          | 0          |
| sp Q9H44 CHMP4B  | sp Q9H44 | 2 | 9  | 9  | 8  | 46  | 24.95  | 1644800000 | 1578100000 | 1428900000 | 1496700000 | 1846700000 | 1564200000 |
| sp Q9H44 RWDD1   | sp Q9H44 | 1 | 3  | 3  | 3  | 18  | 27.939 | 72149000   | 70472000   | 64145000   | 67389000   | 0          | 65166000   |
| sp Q9H48 POFUT1  | sp Q9H48 | 1 | 8  | 8  | 8  | 34  | 43.955 | 836550000  | 841930000  | 687800000  | 886250000  | 730810000  | 934050000  |
| sp Q9H49 PIGU    | sp Q9H49 | 1 | 2  | 2  | 2  | 6.4 | 50.051 | 91789000   | 114290000  | 100400000  | 124900000  | 0          | 0          |
| sp Q9H4A WNK1    | sp Q9H4A | 4 | 14 | 14 | 14 | 9.2 | 250.79 | 478310000  | 508050000  | 458970000  | 532510000  | 631380000  | 469930000  |
| sp Q9H4A RNPEP   | sp Q9H4A | 1 | 16 | 16 | 16 | 32  | 72.595 | 1916900000 | 2236700000 | 1896400000 | 1910300000 | 1972900000 | 1815100000 |
| sp Q9H4A GOLPH3  | sp Q9H4A | 1 | 7  | 7  | 7  | 35  | 33.81  | 811710000  | 756120000  | 688540000  | 696880000  | 941470000  | 819280000  |
| sp Q9H4G EPB41L1 | sp Q9H4G | 1 | 8  | 8  | 7  | 15  | 98.502 | 472890000  | 551960000  | 488610000  | 428790000  | 392850000  | 449580000  |
| sp Q9H4G GLIPR2  | sp Q9H4G | 1 | 2  | 2  | 2  | 20  | 17.218 | 119940000  | 170290000  | 0          | 111500000  | 150000000  | 133450000  |
| sp Q9H4H FAM83D  | sp Q9H4H | 1 | 4  | 3  | 3  | 10  | 64.424 | 51031000   | 0          | 46702000   | 57847000   | 81154000   | 0          |
| sp Q9H4I TRABD   | sp Q9H4I | 1 | 1  | 1  | 1  | 5.9 | 42.321 | 0          | 0          | 0          | 0          | 0          | 29282000   |
| sp Q9H4L SENP3   | sp Q9H4L | 1 | 5  | 5  | 5  | 14  | 65.009 | 374330000  | 532780000  | 0          | 548140000  | 174260000  | 0          |
| sp Q9H4L OSBPL3  | sp Q9H4L | 1 | 1  | 1  | 1  | 1.5 | 101.22 | 0          | 0          | 0          | 0          | 0          | 0          |
| sp Q9H4M EHD1    | sp Q9H4M | 1 | 20 | 20 | 17 | 50  | 60.626 | 2128200000 | 2475200000 | 2145700000 | 2152300000 | 2260100000 | 2365500000 |
| sp Q9H4Z PCIF1   | sp Q9H4Z | 1 | 1  | 1  | 1  | 2.3 | 80.669 | 0          | 0          | 0          | 0          | 0          | 39896000   |
| sp Q9H55 ALG2    | sp Q9H55 | 1 | 2  | 2  | 2  | 7.7 | 47.091 | 0          | 0          | 0          | 0          | 67543000   | 0          |

|          |         |          |   |    |    |    |     |        |            |            |            |            |            |            |
|----------|---------|----------|---|----|----|----|-----|--------|------------|------------|------------|------------|------------|------------|
| sp Q9H58 | HEATR1  | sp Q9H58 | 1 | 22 | 22 | 22 | 13  | 242.37 | 140200000  | 117550000  | 151710000  | 133110000  | 102490000  | 100260000  |
| sp Q9H5C | TFB2M   | sp Q9H5C | 1 | 2  | 2  | 2  | 6.8 | 45.348 | 0          | 111940000  | 0          | 0          | 94739000   | 145880000  |
| sp Q9H5V | CDCP1   | sp Q9H5V | 1 | 3  | 3  | 3  | 3.2 | 92.931 | 53939000   | 56061000   | 64634000   | 62548000   | 65879000   | 79217000   |
| sp Q9H5V | CXorf56 | sp Q9H5V | 1 | 1  | 1  | 1  | 5.9 | 25.624 | 0          | 0          | 0          | 0          | 0          | 23207000   |
| sp Q9H6E | TUT1    | sp Q9H6E | 1 | 2  | 2  | 2  | 4.9 | 93.846 | 0          | 61333000   | 0          | 0          | 0          | 60618000   |
| sp Q9H6F | CCDC86  | sp Q9H6F | 1 | 6  | 6  | 6  | 26  | 40.235 | 448730000  | 347570000  | 373690000  | 0          | 0          | 408410000  |
| sp Q9H6R | NOL6    | sp Q9H6R | 1 | 17 | 17 | 17 | 21  | 127.59 | 576040000  | 707360000  | 723950000  | 642180000  | 888050000  | 699210000  |
| sp Q9H6S | YTHDC2  | sp Q9H6S | 1 | 11 | 11 | 11 | 13  | 160.25 | 167120000  | 255820000  | 220320000  | 249940000  | 239780000  | 168070000  |
| sp Q9H6S | EPS8L2  | sp Q9H6S | 1 | 2  | 2  | 2  | 4.3 | 80.62  | 161020000  | 123570000  | 168090000  | 121750000  | 148120000  | 114450000  |
| sp Q9H6T | RPAP3   | sp Q9H6T | 1 | 7  | 7  | 7  | 16  | 75.718 | 343100000  | 462120000  | 401140000  | 376250000  | 319830000  | 301440000  |
| sp Q9H6V | LDAH    | sp Q9H6V | 1 | 2  | 2  | 2  | 7.4 | 37.318 | 0          | 0          | 69872000   | 0          | 0          | 0          |
| sp Q9H6Y | WDR55   | sp Q9H6Y | 1 | 4  | 4  | 4  | 17  | 42.07  | 178580000  | 215250000  | 0          | 0          | 221610000  | 213770000  |
| sp Q9H6Z | RANBP3  | sp Q9H6Z | 1 | 5  | 5  | 5  | 12  | 60.209 | 548360000  | 408850000  | 408690000  | 398860000  | 268380000  | 470870000  |
| sp Q9H77 | DCTPP1  | sp Q9H77 | 1 | 9  | 9  | 9  | 58  | 18.681 | 1397600000 | 1529200000 | 1394700000 | 1296200000 | 1755000000 | 1495600000 |
| sp Q9H78 | SH2D4A  | sp Q9H78 | 1 | 8  | 8  | 8  | 23  | 52.726 | 413410000  | 129770000  | 0          | 158660000  | 0          | 239430000  |
| sp Q9H7B | RPF2    | sp Q9H7B | 1 | 5  | 5  | 5  | 21  | 35.582 | 375850000  | 461200000  | 392120000  | 458500000  | 427160000  | 334770000  |
| sp Q9H7B | SMYD3   | sp Q9H7B | 1 | 3  | 3  | 3  | 9.8 | 49.097 | 0          | 59094000   | 46547000   | 65898000   | 35046000   | 0          |
| sp Q9H7D | DOCK5   | sp Q9H7D | 1 | 3  | 3  | 3  | 1.9 | 215.31 | 0          | 93001000   | 92680000   | 0          | 0          | 0          |
| sp Q9H7D | WDR26   | sp Q9H7D | 1 | 1  | 1  | 1  | 3   | 72.123 | 0          | 0          | 0          | 0          | 30784000   | 0          |
| sp Q9H7E | C8orf33 | sp Q9H7E | 1 | 4  | 4  | 4  | 31  | 24.992 | 698430000  | 478890000  | 540850000  | 779620000  | 557260000  | 554430000  |
| sp Q9H7N | SCAF1   | sp Q9H7N | 1 | 2  | 2  | 2  | 2   | 139.27 | 0          | 0          | 0          | 0          | 29117000   | 0          |
| sp Q9H7Z | PTGES2  | sp Q9H7Z | 1 | 5  | 5  | 5  | 18  | 41.943 | 570540000  | 583210000  | 476900000  | 439740000  | 471080000  | 379340000  |
| sp Q9H81 | PHAX    | sp Q9H81 | 1 | 4  | 4  | 4  | 13  | 44.402 | 78115000   | 81547000   | 93989000   | 0          | 0          | 0          |
| sp Q9H83 | UBE2Z   | sp Q9H83 | 1 | 8  | 8  | 8  | 23  | 38.21  | 592980000  | 501310000  | 617160000  | 497620000  | 363550000  | 442070000  |
| sp Q9H84 | GEMIN7  | sp Q9H84 | 1 | 1  | 1  | 1  | 9.9 | 14.536 | 0          | 0          | 0          | 0          | 0          | 28538000   |
| sp Q9H84 | ACAD9   | sp Q9H84 | 1 | 11 | 11 | 11 | 24  | 68.76  | 823440000  | 1112000000 | 1114300000 | 1143100000 | 1134600000 | 1208600000 |
| sp Q9H85 | NT5DC2  | sp Q9H85 | 1 | 2  | 2  | 2  | 3.7 | 60.718 | 37433000   | 0          | 0          | 42919000   | 0          | 0          |
| sp Q9H87 | RMND5A  | sp Q9H87 | 1 | 1  | 1  | 1  | 3.3 | 43.992 | 0          | 0          | 24300000   | 0          | 0          | 0          |
| sp Q9H8H | NOL11   | sp Q9H8H | 1 | 8  | 8  | 8  | 18  | 81.123 | 307230000  | 328120000  | 324010000  | 284730000  | 322530000  | 292460000  |
| sp Q9H8H | DDX31   | sp Q9H8H | 1 | 4  | 4  | 4  | 6.2 | 94.086 | 136280000  | 110400000  | 92788000   | 0          | 0          | 0          |
| sp Q9H8H | METTL7A | sp Q9H8H | 1 | 2  | 2  | 2  | 11  | 28.319 | 0          | 0          | 0          | 0          | 0          | 65148000   |
| sp Q9H8M | MINDY3  | sp Q9H8M | 1 | 1  | 1  | 1  | 3.4 | 49.724 | 0          | 0          | 0          | 0          | 19322000   | 0          |
| sp Q9H8S | MOB1A   | sp Q9H8S | 2 | 6  | 6  | 6  | 29  | 25.079 | 422390000  | 614230000  | 437320000  | 368920000  | 503500000  | 385890000  |
| sp Q9H8Y | ANKZF1  | sp Q9H8Y | 1 | 4  | 4  | 4  | 8.4 | 80.926 | 66558000   | 0          | 0          | 93470000   | 104090000  | 0          |
| sp Q9H8Y | GORASP2 | sp Q9H8Y | 1 | 3  | 3  | 3  | 8   | 47.145 | 453800000  | 419970000  | 382010000  | 361030000  | 503930000  | 566900000  |
| sp Q9H91 | JPT2    | sp Q9H91 | 1 | 8  | 8  | 8  | 62  | 20.063 | 1233300000 | 1294600000 | 1398000000 | 1395600000 | 1489000000 | 1086900000 |
| sp Q9H93 | SP140L  | sp Q9H93 | 1 | 2  | 1  | 1  | 3.3 | 67.005 | 0          | 0          | 0          | 113150000  | 0          | 0          |
| sp Q9H93 | SLC25A2 | sp Q9H93 | 2 | 4  | 4  | 4  | 14  | 34.47  | 239140000  | 0          | 0          | 250450000  | 272750000  | 368020000  |
| sp Q9H94 | MED20   | sp Q9H94 | 1 | 2  | 2  | 2  | 12  | 23.222 | 0          | 0          | 0          | 0          | 0          | 96260000   |

|                   |          |   |    |    |    |     |        |            |            |            |            |            |            |
|-------------------|----------|---|----|----|----|-----|--------|------------|------------|------------|------------|------------|------------|
| sp Q9H97 QTRT2    | sp Q9H97 | 1 | 2  | 2  | 2  | 8.2 | 46.712 | 0          | 0          | 0          | 0          | 0          | 15721000   |
| sp Q9H99 ARMT1    | sp Q9H99 | 1 | 3  | 3  | 3  | 13  | 51.172 | 340280000  | 420350000  | 320050000  | 432770000  | 306050000  | 568790000  |
| sp Q9H9A CNOT10   | sp Q9H9A | 1 | 3  | 3  | 3  | 6   | 82.309 | 172790000  | 0          | 0          | 0          | 0          | 73574000   |
| sp Q9H9A LRRC40   | sp Q9H9A | 1 | 16 | 16 | 16 | 38  | 68.249 | 754780000  | 840890000  | 751370000  | 713540000  | 660050000  | 672970000  |
| sp Q9H9B SFXN1    | sp Q9H9B | 1 | 12 | 12 | 11 | 56  | 35.619 | 2477800000 | 2768700000 | 2229100000 | 3024700000 | 3240200000 | 3153000000 |
| sp Q9H9C VIPAS39  | sp Q9H9C | 1 | 1  | 1  | 1  | 4.3 | 57.005 | 0          | 0          | 0          | 0          | 0          | 11150000   |
| sp Q9H9F ACTR5    | sp Q9H9F | 1 | 2  | 2  | 2  | 4.8 | 68.297 | 0          | 0          | 0          | 0          | 0          | 54586000   |
| sp Q9H9H VPS37B   | sp Q9H9H | 1 | 4  | 4  | 4  | 25  | 31.307 | 129390000  | 129950000  | 0          | 140750000  | 117470000  | 108970000  |
| sp Q9H9J MRPL44   | sp Q9H9J | 1 | 8  | 8  | 8  | 39  | 37.535 | 450500000  | 389330000  | 376000000  | 421620000  | 368260000  | 370640000  |
| sp Q9H9F L2HGDH   | sp Q9H9F | 1 | 3  | 3  | 3  | 8.4 | 50.315 | 79207000   | 0          | 72136000   | 55597000   | 83471000   | 0          |
| sp Q9H9C COPS7B   | sp Q9H9C | 1 | 3  | 3  | 3  | 16  | 29.622 | 147410000  | 145220000  | 138280000  | 164220000  | 166130000  | 0          |
| sp Q9H9T ELP3     | sp Q9H9T | 1 | 4  | 4  | 4  | 12  | 62.258 | 117170000  | 135380000  | 127010000  | 125930000  | 98329000   | 107720000  |
| sp Q9H9Y POLR1B   | sp Q9H9Y | 1 | 3  | 3  | 3  | 3.1 | 128.23 | 71792000   | 75405000   | 65215000   | 65387000   | 64620000   | 0          |
| sp Q9HA7 CARS2    | sp Q9HA7 | 1 | 2  | 2  | 2  | 5.1 | 62.223 | 0          | 0          | 0          | 0          | 0          | 311350000  |
| sp Q9HAE PPCS     | sp Q9HAE | 1 | 2  | 2  | 2  | 6.8 | 34.005 | 145130000  | 0          | 104240000  | 110190000  | 0          | 0          |
| sp Q9HAI WDR41    | sp Q9HAI | 1 | 1  | 1  | 1  | 4.8 | 51.727 | 47726000   | 0          | 44431000   | 37572000   | 39303000   | 0          |
| sp Q9HAK EBF2     | sp Q9HAK | 1 | 1  | 1  | 1  | 1.9 | 62.649 | 0          | 0          | 0          | 0          | 0          | 748090000  |
| sp Q9HAU PLEKHA5  | sp Q9HAU | 1 | 3  | 3  | 3  | 3.6 | 127.46 | 0          | 0          | 0          | 0          | 0          | 46051000   |
| sp Q9HAU UPF2     | sp Q9HAU | 1 | 3  | 3  | 3  | 3.2 | 147.81 | 0          | 75386000   | 0          | 73080000   | 73462000   | 0          |
| sp Q9HAV GNB4     | sp Q9HAV | 2 | 8  | 3  | 3  | 34  | 37.567 | 0          | 0          | 216560000  | 245290000  | 0          | 0          |
| sp Q9HAV XPO5     | sp Q9HAV | 1 | 15 | 15 | 15 | 15  | 136.31 | 709460000  | 679500000  | 615380000  | 706580000  | 762840000  | 778050000  |
| sp Q9HAV GRPEL1   | sp Q9HAV | 1 | 7  | 7  | 7  | 38  | 24.279 | 1064800000 | 1455200000 | 1059700000 | 1200100000 | 1676000000 | 1750300000 |
| sp Q9HB0 C12orf10 | sp Q9HB0 | 1 | 11 | 11 | 11 | 40  | 42.449 | 1506600000 | 1622800000 | 1564300000 | 1578800000 | 1523600000 | 1327600000 |
| sp Q9HB1 PLEKHA2  | sp Q9HB1 | 1 | 6  | 6  | 6  | 21  | 47.254 | 168280000  | 209720000  | 146210000  | 169150000  | 185230000  | 231580000  |
| sp Q9HB4 SCPEP1   | sp Q9HB4 | 1 | 2  | 2  | 2  | 7.1 | 50.83  | 0          | 0          | 0          | 74864000   | 0          | 0          |
| sp Q9HB7 CACYPB   | sp Q9HB7 | 1 | 14 | 14 | 14 | 68  | 26.21  | 8399300000 | 8202800000 | 8555400000 | 8243900000 | 9057200000 | 8661400000 |
| sp Q9HBH RDH14    | sp Q9HBH | 1 | 2  | 2  | 2  | 8.6 | 36.864 | 0          | 0          | 76289000   | 0          | 0          | 0          |
| sp Q9HBI PARVB    | sp Q9HBI | 1 | 3  | 2  | 2  | 11  | 41.714 | 0          | 0          | 0          | 176810000  | 0          | 0          |
| sp Q9HBL PLGRKT   | sp Q9HBL | 1 | 2  | 2  | 2  | 16  | 17.201 | 55779000   | 0          | 0          | 71067000   | 101570000  | 0          |
| sp Q9HBN SPC25    | sp Q9HBN | 1 | 2  | 2  | 2  | 10  | 26.152 | 109530000  | 116850000  | 104270000  | 86739000   | 88680000   | 89274000   |
| sp Q9HC0 TMEM165  | sp Q9HC0 | 1 | 4  | 4  | 4  | 23  | 34.905 | 634030000  | 768470000  | 542270000  | 599870000  | 782810000  | 834590000  |
| sp Q9HC2 SLC25A1  | sp Q9HC2 | 1 | 2  | 2  | 2  | 6.2 | 35.511 | 52879000   | 48104000   | 36993000   | 62730000   | 58949000   | 52238000   |
| sp Q9HC3 EML4     | sp Q9HC3 | 1 | 9  | 9  | 9  | 12  | 108.91 | 326240000  | 309930000  | 327820000  | 326870000  | 285930000  | 380160000  |
| sp Q9HC3 MRM3     | sp Q9HC3 | 1 | 4  | 4  | 4  | 13  | 47.019 | 0          | 142020000  | 88012000   | 91004000   | 96683000   | 113580000  |
| sp Q9HC3 GLOD4    | sp Q9HC3 | 1 | 12 | 12 | 12 | 42  | 34.793 | 971880000  | 1371100000 | 1137100000 | 931120000  | 1157200000 | 949890000  |
| sp Q9HC5 CBX8     | sp Q9HC5 | 2 | 3  | 3  | 3  | 8.2 | 43.395 | 0          | 61422000   | 0          | 0          | 0          | 0          |
| sp Q9HC0 MCCC2    | sp Q9HC0 | 1 | 9  | 9  | 9  | 22  | 61.332 | 437350000  | 434120000  | 474340000  | 516440000  | 517610000  | 453560000  |
| sp Q9HCL NCOA5    | sp Q9HCL | 1 | 7  | 7  | 7  | 17  | 65.536 | 232860000  | 324660000  | 210260000  | 202410000  | 270500000  | 237180000  |
| sp Q9HCE MOV10    | sp Q9HCE | 1 | 9  | 9  | 9  | 12  | 113.67 | 263840000  | 252800000  | 235380000  | 232760000  | 237540000  | 333180000  |

|                  |          |   |    |    |    |     |        |            |            |            |            |            |            |
|------------------|----------|---|----|----|----|-----|--------|------------|------------|------------|------------|------------|------------|
| sp Q9HCN GPN1    | sp Q9HCN | 1 | 4  | 4  | 4  | 18  | 41.74  | 0          | 0          | 0          | 0          | 0          | 1010200000 |
| sp Q9HCN SDF2L1  | sp Q9HCN | 1 | 4  | 4  | 4  | 34  | 23.598 | 359850000  | 300340000  | 248380000  | 343040000  | 455260000  | 507980000  |
| sp Q9HCS XAB2    | sp Q9HCS | 1 | 8  | 8  | 8  | 11  | 100.01 | 253700000  | 299110000  | 215680000  | 283310000  | 0          | 268220000  |
| sp Q9HCU PREB    | sp Q9HCU | 1 | 3  | 3  | 3  | 15  | 45.468 | 123100000  | 0          | 0          | 0          | 87951000   | 141590000  |
| sp Q9HD1 SRA1    | sp Q9HD1 | 1 | 4  | 4  | 4  | 24  | 25.673 | 191460000  | 245480000  | 281440000  | 159180000  | 198810000  | 178630000  |
| sp Q9HD2 ATP13A1 | sp Q9HD2 | 1 | 8  | 8  | 8  | 9.1 | 132.95 | 265800000  | 249460000  | 162800000  | 269960000  | 214360000  | 286960000  |
| sp Q9HD2 GOPC    | sp Q9HD2 | 1 | 6  | 6  | 6  | 17  | 50.519 | 243940000  | 205720000  | 0          | 247700000  | 261900000  | 190430000  |
| sp Q9HD4 CHMP1A  | sp Q9HD4 | 1 | 2  | 2  | 2  | 8.7 | 21.703 | 0          | 68269000   | 77530000   | 61619000   | 0          | 0          |
| sp Q9HD4 TM9SF3  | sp Q9HD4 | 1 | 5  | 5  | 5  | 10  | 67.887 | 636890000  | 624500000  | 733320000  | 878810000  | 833930000  | 806700000  |
| sp Q9HD6 MYO10   | sp Q9HD6 | 1 | 4  | 4  | 4  | 3.2 | 237.34 | 206510000  | 161780000  | 178350000  | 147070000  | 154140000  | 159640000  |
| sp Q9HDC APMAP   | sp Q9HDC | 1 | 11 | 11 | 11 | 34  | 46.48  | 1509200000 | 1600800000 | 1564900000 | 1675800000 | 1343600000 | 1503500000 |
| sp Q9NNV WDR6    | sp Q9NNV | 1 | 4  | 4  | 4  | 7.4 | 121.72 | 107280000  | 101980000  | 120350000  | 121400000  | 94216000   | 108140000  |
| sp Q9NNV TXNRD2  | sp Q9NNV | 1 | 3  | 2  | 2  | 9.7 | 56.506 | 0          | 0          | 0          | 0          | 77248000   | 0          |
| sp Q9NP5 ABCB6   | sp Q9NP5 | 1 | 10 | 10 | 10 | 21  | 93.884 | 357550000  | 398980000  | 362010000  | 438620000  | 407780000  | 384100000  |
| sp Q9NP6 ARFGAP3 | sp Q9NP6 | 1 | 2  | 2  | 2  | 4.8 | 56.928 | 0          | 0          | 0          | 0          | 63104000   | 0          |
| sp Q9NP6 HMG20A  | sp Q9NP6 | 1 | 2  | 2  | 2  | 12  | 40.143 | 0          | 21307000   | 0          | 0          | 0          | 0          |
| sp Q9NP7 RAB18   | sp Q9NP7 | 1 | 8  | 8  | 8  | 52  | 22.977 | 1737300000 | 1214900000 | 1306400000 | 1520100000 | 1747200000 | 1440300000 |
| sp Q9NP7 ALG13   | sp Q9NP7 | 1 | 1  | 1  | 1  | 1.7 | 126.05 | 0          | 0          | 0          | 0          | 0          | 0          |
| sp Q9NP7 PALMD   | sp Q9NP7 | 1 | 4  | 4  | 4  | 14  | 62.757 | 152550000  | 193710000  | 157970000  | 140590000  | 167360000  | 149160000  |
| sp Q9NP7 SSU72   | sp Q9NP7 | 1 | 4  | 4  | 4  | 24  | 22.574 | 232550000  | 250520000  | 263220000  | 225820000  | 280720000  | 233560000  |
| sp Q9NP7 VTA1    | sp Q9NP7 | 1 | 7  | 7  | 7  | 31  | 33.879 | 1037300000 | 1127100000 | 1212500000 | 772530000  | 1178400000 | 987920000  |
| sp Q9NP8 SARS2   | sp Q9NP8 | 1 | 6  | 6  | 6  | 19  | 58.282 | 257690000  | 186280000  | 237480000  | 295420000  | 364160000  | 265970000  |
| sp Q9NP9 MRPS30  | sp Q9NP9 | 1 | 6  | 6  | 6  | 25  | 50.364 | 582950000  | 266500000  | 624860000  | 438010000  | 358410000  | 337880000  |
| sp Q9NP9 DYNLRB1 | sp Q9NP9 | 2 | 3  | 3  | 3  | 26  | 10.921 | 0          | 0          | 0          | 688600000  | 575150000  | 0          |
| sp Q9NPA EMC7    | sp Q9NPA | 1 | 6  | 6  | 6  | 48  | 26.47  | 209110000  | 265060000  | 328300000  | 349880000  | 202760000  | 176220000  |
| sp Q9NPA ENY2    | sp Q9NPA | 1 | 2  | 2  | 2  | 24  | 11.528 | 204820000  | 283460000  | 306280000  | 151660000  | 225350000  | 205850000  |
| sp Q9NPD EXOSC4  | sp Q9NPD | 1 | 6  | 6  | 6  | 29  | 26.383 | 324770000  | 196990000  | 0          | 419700000  | 559650000  | 334270000  |
| sp Q9NPD UBE2T   | sp Q9NPD | 1 | 5  | 5  | 5  | 37  | 22.521 | 366190000  | 409600000  | 412380000  | 209610000  | 285220000  | 289290000  |
| sp Q9NPE NOP10   | sp Q9NPE | 1 | 2  | 2  | 2  | 38  | 7.7059 | 288180000  | 243020000  | 199150000  | 190690000  | 0          | 224200000  |
| sp Q9NPF OSGEP   | sp Q9NPF | 1 | 4  | 4  | 4  | 19  | 36.426 | 291000000  | 0          | 365810000  | 316760000  | 289280000  | 340180000  |
| sp Q9NPF DMAP1   | sp Q9NPF | 1 | 2  | 2  | 2  | 6.4 | 52.992 | 0          | 25743000   | 0          | 0          | 0          | 0          |
| sp Q9NPI BRD7    | sp Q9NPI | 1 | 1  | 1  | 1  | 3.4 | 74.138 | 0          | 0          | 0          | 54957000   | 0          | 0          |
| sp Q9NPI DCP1A   | sp Q9NPI | 1 | 1  | 1  | 1  | 4.1 | 63.309 | 0          | 0          | 0          | 0          | 51935000   | 0          |
| sp Q9NPJ ACOT13  | sp Q9NPJ | 1 | 2  | 2  | 2  | 16  | 14.96  | 454600000  | 499730000  | 498170000  | 493590000  | 582670000  | 539360000  |
| sp Q9NPC RIC8A   | sp Q9NPC | 1 | 4  | 4  | 4  | 12  | 59.709 | 0          | 0          | 124540000  | 85620000   | 128060000  | 0          |
| sp Q9NQ2 LUC7L   | sp Q9NQ2 | 1 | 10 | 5  | 5  | 28  | 43.727 | 153330000  | 208920000  | 219920000  | 215000000  | 231840000  | 193680000  |
| sp Q9NQ4 LZTFL1  | sp Q9NQ4 | 1 | 1  | 1  | 1  | 4.3 | 34.592 | 0          | 0          | 0          | 0          | 0          | 35588000   |
| sp Q9NQ5 MRPL40  | sp Q9NQ5 | 1 | 2  | 2  | 2  | 17  | 24.49  | 264080000  | 277300000  | 336690000  | 289830000  | 316560000  | 255460000  |
| sp Q9NQ5 PPAN    | sp Q9NQ5 | 1 | 6  | 6  | 6  | 20  | 53.193 | 243040000  | 207270000  | 165600000  | 194740000  | 206720000  | 155080000  |

|          |         |          |   |    |    |    |     |        |            |            |            |             |             |            |
|----------|---------|----------|---|----|----|----|-----|--------|------------|------------|------------|-------------|-------------|------------|
| sp Q9NQ8 | TIGAR   | sp Q9NQ8 | 1 | 5  | 5  | 5  | 26  | 30.062 | 312840000  | 360980000  | 196180000  | 321260000   | 361750000   | 259530000  |
| sp Q9NQ9 | COPRS   | sp Q9NQ9 | 1 | 2  | 2  | 2  | 19  | 20.066 | 0          | 0          | 0          | 0           | 24275000    | 0          |
| sp Q9NQ0 | RTN4    | sp Q9NQ0 | 1 | 11 | 11 | 11 | 18  | 129.93 | 6506000000 | 7046400000 | 5409300000 | 7613700000  | 7142100000  | 6147500000 |
| sp Q9NQ0 | RPRD1B  | sp Q9NQ0 | 1 | 6  | 5  | 5  | 32  | 36.899 | 185970000  | 195630000  | 171250000  | 240970000   | 189940000   | 392220000  |
| sp Q9NQF | PFDN4   | sp Q9NQF | 1 | 2  | 2  | 2  | 20  | 15.314 | 318080000  | 0          | 0          | 0           | 0           | 0          |
| sp Q9NQF | NIT2    | sp Q9NQF | 1 | 9  | 9  | 9  | 47  | 30.608 | 761720000  | 988050000  | 952320000  | 819410000   | 749290000   | 859800000  |
| sp Q9NQ9 | INCENP  | sp Q9NQ9 | 1 | 2  | 2  | 2  | 3.3 | 105.43 | 82440000   | 65811000   | 0          | 0           | 0           | 0          |
| sp Q9NQ7 | EXOSC5  | sp Q9NQ7 | 1 | 4  | 4  | 4  | 41  | 25.249 | 300670000  | 263900000  | 321220000  | 371010000   | 454490000   | 0          |
| sp Q9NQ7 | EXOSC3  | sp Q9NQ7 | 1 | 7  | 7  | 7  | 46  | 29.572 | 575880000  | 455520000  | 462790000  | 341060000   | 384890000   | 510520000  |
| sp Q9NQV | ANLN    | sp Q9NQV | 1 | 15 | 15 | 15 | 20  | 124.2  | 344270000  | 504710000  | 483950000  | 456320000   | 454320000   | 458080000  |
| sp Q9NQV | XPNPEP1 | sp Q9NQV | 1 | 8  | 8  | 8  | 25  | 69.917 | 376760000  | 469780000  | 404080000  | 400230000   | 461090000   | 491860000  |
| sp Q9NQX | GPHN    | sp Q9NQX | 1 | 3  | 3  | 3  | 6.9 | 79.748 | 93592000   | 134220000  | 0          | 0           | 100530000   | 0          |
| sp Q9NQ2 | UTP3    | sp Q9NQ2 | 1 | 6  | 6  | 6  | 19  | 54.557 | 0          | 136150000  | 0          | 227330000   | 167540000   | 161920000  |
| sp Q9NR0 | BIRC6   | sp Q9NR0 | 1 | 2  | 2  | 2  | 0.7 | 530.25 | 0          | 0          | 0          | 0           | 42623000    | 0          |
| sp Q9NR1 | PDLIM7  | sp Q9NR1 | 1 | 17 | 17 | 17 | 48  | 49.844 | 3742100000 | 3247800000 | 2954400000 | 3207900000  | 3639300000  | 3331900000 |
| sp Q9NR2 | DIABLO  | sp Q9NR2 | 1 | 3  | 3  | 3  | 12  | 27.131 | 308550000  | 340560000  | 449600000  | 333480000   | 269190000   | 311910000  |
| sp Q9NR3 | DDX21   | sp Q9NR3 | 1 | 34 | 34 | 32 | 48  | 87.343 | 1.0338E+10 | 8784900000 | 8939300000 | 10901000000 | 10632000000 | 1.2393E+10 |
| sp Q9NR3 | SAR1A   | sp Q9NR3 | 1 | 9  | 9  | 6  | 55  | 22.367 | 1418900000 | 1644000000 | 1477400000 | 1876900000  | 2157700000  | 1728800000 |
| sp Q9NR4 | NANS    | sp Q9NR4 | 1 | 9  | 9  | 9  | 35  | 40.307 | 1189800000 | 1228500000 | 1410500000 | 1268900000  | 1403600000  | 1301100000 |
| sp Q9NR4 | SH3GLB2 | sp Q9NR4 | 1 | 9  | 9  | 9  | 32  | 43.973 | 341310000  | 320900000  | 267830000  | 313590000   | 136820000   | 243010000  |
| sp Q9NR5 | EIF2B3  | sp Q9NR5 | 1 | 7  | 7  | 7  | 25  | 50.24  | 391490000  | 276460000  | 484510000  | 384340000   | 396940000   | 300510000  |
| sp Q9NR5 | MBNL1   | sp Q9NR5 | 1 | 4  | 4  | 2  | 14  | 41.817 | 797430000  | 668390000  | 896610000  | 515550000   | 843580000   | 789250000  |
| sp Q9NRF | CTPS2   | sp Q9NRF | 1 | 5  | 4  | 4  | 11  | 65.677 | 158340000  | 153720000  | 0          | 167180000   | 0           | 0          |
| sp Q9NRF | POLE3   | sp Q9NRF | 1 | 3  | 3  | 3  | 24  | 16.859 | 340510000  | 454410000  | 553930000  | 555190000   | 418180000   | 301500000  |
| sp Q9NR0 | CHRA1   | sp Q9NR0 | 1 | 3  | 3  | 3  | 25  | 14.71  | 154800000  | 113420000  | 140450000  | 172100000   | 219320000   | 0          |
| sp Q9NR0 | SDR39U1 | sp Q9NR0 | 1 | 1  | 1  | 1  | 9.4 | 34.747 | 0          | 0          | 0          | 0           | 0           | 16186000   |
| sp Q9NR0 | AAAS    | sp Q9NR0 | 1 | 7  | 7  | 7  | 19  | 59.573 | 292510000  | 354410000  | 328180000  | 382420000   | 410290000   | 448340000  |
| sp Q9NRL | BAZ1A   | sp Q9NRL | 1 | 5  | 5  | 5  | 5.7 | 178.7  | 128010000  | 80930000   | 97850000   | 107460000   | 84133000    | 128590000  |
| sp Q9NRL | STRN4   | sp Q9NRL | 1 | 3  | 3  | 3  | 9   | 80.595 | 0          | 0          | 132620000  | 0           | 0           | 0          |
| sp Q9NRN | AASDHPF | sp Q9NRN | 1 | 5  | 5  | 5  | 21  | 35.776 | 113400000  | 116540000  | 106440000  | 166490000   | 161990000   | 125920000  |
| sp Q9NRF | OSTC    | sp Q9NRF | 1 | 1  | 1  | 1  | 8.1 | 16.829 | 0          | 0          | 0          | 0           | 0           | 310270000  |
| sp Q9NRF | UBQLN4  | sp Q9NRF | 1 | 10 | 7  | 7  | 26  | 63.852 | 547590000  | 362530000  | 430460000  | 573470000   | 416410000   | 195880000  |
| sp Q9NRV | HEBP1   | sp Q9NRV | 1 | 4  | 4  | 4  | 24  | 21.097 | 400010000  | 499910000  | 396260000  | 488100000   | 447170000   | 303680000  |
| sp Q9NRV | VPS45   | sp Q9NRV | 1 | 4  | 4  | 4  | 11  | 65.076 | 0          | 116610000  | 180770000  | 0           | 0           | 102660000  |
| sp Q9NRX | PNO1    | sp Q9NRX | 1 | 4  | 4  | 4  | 20  | 27.924 | 0          | 0          | 0          | 0           | 71735000    | 0          |
| sp Q9NRX | MRPL17  | sp Q9NRX | 1 | 5  | 5  | 5  | 31  | 20.05  | 204640000  | 264660000  | 200050000  | 198530000   | 282840000   | 161250000  |
| sp Q9NRX | PHPT1   | sp Q9NRX | 1 | 4  | 4  | 4  | 51  | 13.832 | 1077900000 | 1234800000 | 836070000  | 1172300000  | 1432000000  | 1066500000 |
| sp Q9NRY | FAM114A | sp Q9NRY | 1 | 3  | 3  | 3  | 11  | 55.468 | 62239000   | 56656000   | 55195000   | 92390000    | 74291000    | 74377000   |
| sp Q9NRY | PLSCR3  | sp Q9NRY | 1 | 1  | 1  | 1  | 6.8 | 31.648 | 0          | 0          | 0          | 0           | 0           | 11430000   |



|          |         |          |   |    |    |    |     |        |            |            |            |            |            |            |
|----------|---------|----------|---|----|----|----|-----|--------|------------|------------|------------|------------|------------|------------|
| sp Q9NRZ | HELLS   | sp Q9NRZ | 1 | 10 | 10 | 10 | 14  | 97.073 | 333830000  | 335590000  | 520930000  | 167210000  | 228080000  | 433260000  |
| sp Q9NS6 | TOMM22  | sp Q9NS6 | 1 | 6  | 6  | 6  | 49  | 15.521 | 1500700000 | 1157900000 | 1133500000 | 1220300000 | 1487500000 | 1371100000 |
| sp Q9NS8 | LANCL2  | sp Q9NS8 | 1 | 5  | 5  | 5  | 16  | 50.854 | 192970000  | 197970000  | 198490000  | 290170000  | 222870000  | 132940000  |
| sp Q9NS8 | KIF15   | sp Q9NS8 | 1 | 6  | 6  | 6  | 4.9 | 160.16 | 0          | 116480000  | 0          | 0          | 78519000   | 0          |
| sp Q9NS9 | RAD18   | sp Q9NS9 | 1 | 1  | 1  | 1  | 3.2 | 56.222 | 0          | 0          | 0          | 0          | 0          | 33924000   |
| sp Q9NSD | FARSB   | sp Q9NSD | 1 | 19 | 19 | 19 | 37  | 66.115 | 2501400000 | 2890200000 | 2712900000 | 2501600000 | 2482200000 | 2784500000 |
| sp Q9NSE | IARS2   | sp Q9NSE | 1 | 19 | 19 | 19 | 27  | 113.79 | 1096800000 | 860510000  | 1082800000 | 1247300000 | 1223600000 | 1014300000 |
| sp Q9NSI | FAM207A | sp Q9NSI | 1 | 3  | 3  | 3  | 22  | 25.456 | 69271000   | 67964000   | 67083000   | 57046000   | 72244000   | 75080000   |
| sp Q9NSK | KLC4    | sp Q9NSK | 1 | 7  | 2  | 2  | 13  | 68.639 | 68327000   | 91856000   | 97442000   | 0          | 0          | 0          |
| sp Q9NSF | CENPM   | sp Q9NSF | 1 | 1  | 1  | 1  | 6.1 | 19.737 | 0          | 0          | 0          | 0          | 0          | 0          |
| sp Q9NSV | DIAPH3  | sp Q9NSV | 1 | 5  | 5  | 5  | 6.1 | 136.92 | 151680000  | 197680000  | 98504000   | 0          | 120750000  | 96585000   |
| sp Q9NT6 | ATG3    | sp Q9NT6 | 1 | 6  | 6  | 6  | 30  | 35.864 | 384260000  | 395130000  | 355030000  | 395330000  | 416650000  | 365920000  |
| sp Q9NTI | PDS5B   | sp Q9NTI | 1 | 14 | 12 | 12 | 12  | 164.67 | 556470000  | 466240000  | 600640000  | 579490000  | 582230000  | 622740000  |
| sp Q9NTJ | SMC4    | sp Q9NTJ | 1 | 33 | 33 | 33 | 29  | 147.18 | 2988400000 | 3143400000 | 3169400000 | 2774500000 | 3147400000 | 3058400000 |
| sp Q9NTJ | SACM1L  | sp Q9NTJ | 1 | 5  | 5  | 5  | 9.2 | 66.966 | 209260000  | 279490000  | 252340000  | 312670000  | 317670000  | 349080000  |
| sp Q9NTK | OLA1    | sp Q9NTK | 1 | 14 | 14 | 14 | 43  | 44.743 | 2827100000 | 2271600000 | 2782500000 | 2736700000 | 2929100000 | 2489500000 |
| sp Q9NTM | CUTC    | sp Q9NTM | 1 | 2  | 2  | 2  | 12  | 29.341 | 0          | 142760000  | 104560000  | 95985000   | 100620000  | 149940000  |
| sp Q9NTX | ECHDC1  | sp Q9NTX | 1 | 6  | 6  | 6  | 27  | 33.698 | 369210000  | 334060000  | 424740000  | 334380000  | 346910000  | 497670000  |
| sp Q9NTZ | RBM12   | sp Q9NTZ | 1 | 11 | 11 | 11 | 14  | 97.394 | 659590000  | 753900000  | 602190000  | 511000000  | 524550000  | 674920000  |
| sp Q9NU2 | MDN1    | sp Q9NU2 | 1 | 11 | 11 | 11 | 3.1 | 632.81 | 200010000  | 176130000  | 181100000  | 207510000  | 201130000  | 180690000  |
| sp Q9NUI | DECR2   | sp Q9NUI | 1 | 2  | 2  | 2  | 9.6 | 30.777 | 0          | 0          | 0          | 0          | 34865000   | 0          |
| sp Q9NUJ | ABHD10  | sp Q9NUJ | 1 | 4  | 4  | 4  | 18  | 33.932 | 265680000  | 309850000  | 223360000  | 298760000  | 329340000  | 454890000  |
| sp Q9NUJ | TCP11L1 | sp Q9NUJ | 1 | 1  | 1  | 1  | 2.4 | 57.034 | 0          | 0          | 0          | 0          | 0          | 17596000   |
| sp Q9NUL | STAU2   | sp Q9NUL | 1 | 3  | 3  | 3  | 7.4 | 62.608 | 0          | 160760000  | 301420000  | 157230000  | 0          | 0          |
| sp Q9NUN | TMEM106 | sp Q9NUN | 1 | 3  | 3  | 3  | 11  | 31.127 | 0          | 211530000  | 0          | 0          | 0          | 0          |
| sp Q9NUC | TXLNG   | sp Q9NUC | 2 | 4  | 4  | 4  | 11  | 60.585 | 0          | 154730000  | 0          | 0          | 0          | 0          |
| sp Q9NUC | SPATS2L | sp Q9NUC | 1 | 8  | 8  | 8  | 17  | 61.728 | 553180000  | 483980000  | 353420000  | 336320000  | 534800000  | 485790000  |
| sp Q9NUC | UFSP2   | sp Q9NUC | 1 | 1  | 1  | 1  | 6   | 53.261 | 0          | 0          | 0          | 0          | 0          | 75195000   |
| sp Q9NUC | ABCF3   | sp Q9NUC | 1 | 9  | 9  | 9  | 19  | 79.744 | 369660000  | 297390000  | 385740000  | 323210000  | 307840000  | 310700000  |
| sp Q9NUC | FAM49B  | sp Q9NUC | 2 | 9  | 9  | 9  | 44  | 36.748 | 1053500000 | 1084100000 | 1223000000 | 1034000000 | 1196300000 | 1078100000 |
| sp Q9NUL | DDX19A  | sp Q9NUL | 1 | 11 | 11 | 3  | 29  | 53.974 | 1116600000 | 1232100000 | 1056300000 | 1204400000 | 1252300000 | 1185200000 |
| sp Q9NV0 | DCAF13  | sp Q9NV0 | 1 | 3  | 3  | 3  | 8.3 | 51.402 | 98143000   | 110260000  | 121770000  | 130640000  | 0          | 0          |
| sp Q9NV3 | IMP3    | sp Q9NV3 | 1 | 2  | 2  | 2  | 15  | 21.85  | 156280000  | 187900000  | 170720000  | 161860000  | 185010000  | 185370000  |
| sp Q9NV5 | MRGBP   | sp Q9NV5 | 1 | 1  | 1  | 1  | 6.4 | 22.417 | 0          | 0          | 0          | 0          | 0          | 26142000   |
| sp Q9NV9 | TMEM30A | sp Q9NV9 | 1 | 1  | 1  | 1  | 4.7 | 40.683 | 0          | 0          | 0          | 0          | 0          | 26796000   |
| sp Q9NVA | UQCC1   | sp Q9NVA | 1 | 1  | 1  | 1  | 3   | 34.6   | 0          | 0          | 0          | 0          | 0          | 19649000   |
| sp Q9NVA | SEPT11  | sp Q9NVA | 1 | 14 | 14 | 8  | 40  | 49.398 | 2692300000 | 2472700000 | 2426300000 | 1992500000 | 2222600000 | 1986500000 |
| sp Q9NVE | PARVA   | sp Q9NVE | 1 | 8  | 8  | 7  | 32  | 42.243 | 644080000  | 534780000  | 676730000  | 517730000  | 440080000  | 451590000  |
| sp Q9NVE | PANK4   | sp Q9NVE | 1 | 4  | 4  | 4  | 7.8 | 85.99  | 0          | 0          | 0          | 0          | 123840000  | 0          |

|          |          |          |   |    |    |    |     |        |            |            |            |            |            |            |
|----------|----------|----------|---|----|----|----|-----|--------|------------|------------|------------|------------|------------|------------|
| sp Q9NVG | TBC1D13  | sp Q9NVG | 1 | 5  | 5  | 5  | 16  | 46.553 | 290720000  | 319800000  | 313420000  | 276680000  | 322420000  | 278520000  |
| sp Q9NVH | DNAJC11  | sp Q9NVH | 1 | 8  | 8  | 8  | 19  | 63.277 | 355450000  | 527720000  | 422140000  | 469540000  | 538520000  | 465730000  |
| sp Q9NVH | INTS7    | sp Q9NVH | 1 | 7  | 7  | 7  | 12  | 106.83 | 1197800000 | 1649800000 | 1381400000 | 1268000000 | 1517100000 | 1441000000 |
| sp Q9NVI | FANCI    | sp Q9NVI | 1 | 10 | 10 | 10 | 9.2 | 149.32 | 880220000  | 1177800000 | 1117800000 | 779350000  | 674610000  | 704830000  |
| sp Q9NVI | ATAD3A   | sp Q9NVI | 1 | 22 | 22 | 7  | 36  | 71.368 | 4070700000 | 4023200000 | 4076900000 | 4691000000 | 5135500000 | 4800900000 |
| sp Q9NVJ | ARL8B    | sp Q9NVJ | 1 | 5  | 5  | 2  | 36  | 21.539 | 528990000  | 632550000  | 720520000  | 508310000  | 512850000  | 521880000  |
| sp Q9NVN | INTS13   | sp Q9NVN | 1 | 1  | 1  | 1  | 1.8 | 80.224 | 14982000   | 0          | 0          | 0          | 0          | 0          |
| sp Q9NVN | GNL3L    | sp Q9NVN | 1 | 2  | 2  | 2  | 4.3 | 65.572 | 142520000  | 182070000  | 0          | 0          | 0          | 144630000  |
| sp Q9NVF | DDX18    | sp Q9NVF | 1 | 12 | 12 | 12 | 25  | 75.406 | 979990000  | 935930000  | 1040300000 | 1422000000 | 1141800000 | 1220600000 |
| sp Q9NVF | ASF1B    | sp Q9NVF | 1 | 4  | 4  | 3  | 33  | 22.433 | 199280000  | 177610000  | 166930000  | 112970000  | 124270000  | 168550000  |
| sp Q9NVC | FAIM     | sp Q9NVC | 1 | 4  | 4  | 4  | 39  | 20.215 | 0          | 238070000  | 0          | 0          | 0          | 0          |
| sp Q9NVS | MRPS18A  | sp Q9NVS | 1 | 3  | 3  | 3  | 18  | 22.184 | 0          | 0          | 0          | 0          | 0          | 191440000  |
| sp Q9NVS | PNPO     | sp Q9NVS | 1 | 4  | 4  | 4  | 24  | 29.988 | 593380000  | 260450000  | 0          | 516400000  | 486980000  | 450480000  |
| sp Q9NVU | SDAD1    | sp Q9NVU | 1 | 2  | 2  | 2  | 3.6 | 79.87  | 0          | 0          | 0          | 67746000   | 0          | 0          |
| sp Q9NVV | MTPAP    | sp Q9NVV | 1 | 4  | 4  | 4  | 11  | 66.171 | 0          | 108330000  | 93286000   | 0          | 96198000   | 120760000  |
| sp Q9NVX | NLE1     | sp Q9NVX | 1 | 8  | 8  | 8  | 26  | 53.32  | 352480000  | 548190000  | 321120000  | 279550000  | 405420000  | 385440000  |
| sp Q9NVZ | NECAP2   | sp Q9NVZ | 1 | 3  | 3  | 3  | 23  | 28.338 | 276660000  | 224470000  | 230420000  | 167580000  | 234470000  | 230010000  |
| sp Q9NWF | RBM28    | sp Q9NWF | 1 | 10 | 10 | 10 | 15  | 85.737 | 353350000  | 305970000  | 281100000  | 318190000  | 288900000  | 313520000  |
| sp Q9NWF | ANO10    | sp Q9NWF | 1 | 5  | 5  | 5  | 8.9 | 76.328 | 253060000  | 301690000  | 232300000  | 242890000  | 248770000  | 326950000  |
| sp Q9NWF | RBM22    | sp Q9NWF | 1 | 5  | 5  | 5  | 15  | 46.895 | 164350000  | 144920000  | 207970000  | 216360000  | 174580000  | 165190000  |
| sp Q9NWF | BSDC1    | sp Q9NWF | 1 | 2  | 2  | 2  | 10  | 47.163 | 0          | 67032000   | 45449000   | 0          | 58748000   | 0          |
| sp Q9NWF | DMAC2    | sp Q9NWF | 1 | 2  | 2  | 2  | 12  | 29.267 | 0          | 83951000   | 54254000   | 52393000   | 0          | 0          |
| sp Q9NWF | WDR70    | sp Q9NWF | 1 | 6  | 6  | 6  | 11  | 73.2   | 246460000  | 276610000  | 0          | 0          | 0          | 0          |
| sp Q9NWF | ARGLU1   | sp Q9NWF | 1 | 2  | 2  | 2  | 5.5 | 33.216 | 0          | 0          | 0          | 0          | 2305500000 | 3904400000 |
| sp Q9NWF | SLTM     | sp Q9NWF | 1 | 8  | 8  | 8  | 9.8 | 117.15 | 348880000  | 297150000  | 382720000  | 583200000  | 386240000  | 0          |
| sp Q9NWF | FKBP14   | sp Q9NWF | 1 | 1  | 1  | 1  | 7.1 | 24.171 | 0          | 0          | 0          | 0          | 30952000   | 0          |
| sp Q9NWF | PIH1D1   | sp Q9NWF | 1 | 4  | 4  | 4  | 21  | 32.363 | 134890000  | 151980000  | 0          | 0          | 302560000  | 224990000  |
| sp Q9NWF | RMND1    | sp Q9NWF | 1 | 1  | 1  | 1  | 1.8 | 51.603 | 0          | 0          | 0          | 0          | 0          | 11581000   |
| sp Q9NWF | PAK1IP1  | sp Q9NWF | 1 | 2  | 2  | 2  | 7.9 | 43.963 | 0          | 0          | 135720000  | 0          | 0          | 0          |
| sp Q9NWF | OXSM     | sp Q9NWF | 1 | 3  | 3  | 3  | 14  | 48.842 | 108450000  | 107490000  | 111640000  | 106410000  | 112280000  | 0          |
| sp Q9NWF | GID8     | sp Q9NWF | 1 | 1  | 1  | 1  | 9.2 | 26.748 | 0          | 0          | 0          | 0          | 0          | 27339000   |
| sp Q9NWF | MRPL22   | sp Q9NWF | 1 | 4  | 4  | 4  | 25  | 23.64  | 204120000  | 244250000  | 209120000  | 206190000  | 233810000  | 233200000  |
| sp Q9NWF | C1orf123 | sp Q9NWF | 1 | 4  | 4  | 4  | 31  | 18.048 | 243540000  | 243870000  | 209650000  | 278730000  | 298170000  | 215010000  |
| sp Q9NWF | BABAM1   | sp Q9NWF | 1 | 3  | 3  | 3  | 18  | 36.56  | 113040000  | 104040000  | 153760000  | 157300000  | 152000000  | 132340000  |
| sp Q9NWF | CLN6     | sp Q9NWF | 1 | 1  | 1  | 1  | 6.8 | 35.919 | 0          | 0          | 0          | 0          | 0          | 47261000   |
| sp Q9NWF | THG1L    | sp Q9NWF | 1 | 3  | 3  | 3  | 15  | 34.83  | 141860000  | 0          | 78175000   | 0          | 144740000  | 116670000  |
| sp Q9NX0 | COMMD8   | sp Q9NX0 | 1 | 2  | 2  | 2  | 21  | 21.09  | 172270000  | 194730000  | 0          | 164650000  | 258400000  | 120220000  |
| sp Q9NX1 | NDUFB11  | sp Q9NX1 | 1 | 3  | 3  | 3  | 33  | 17.316 | 611940000  | 428460000  | 483650000  | 370280000  | 428200000  | 421210000  |
| sp Q9NX1 | SDHAF2   | sp Q9NX1 | 1 | 4  | 4  | 4  | 36  | 19.599 | 218440000  | 220550000  | 258850000  | 270300000  | 267080000  | 249940000  |

|          |         |          |   |    |    |    |     |        |            |            |            |            |            |            |
|----------|---------|----------|---|----|----|----|-----|--------|------------|------------|------------|------------|------------|------------|
| sp Q9NX2 | MRPL16  | sp Q9NX2 | 1 | 3  | 3  | 3  | 16  | 28.449 | 192820000  | 220700000  | 128420000  | 113860000  | 181270000  | 961010000  |
| sp Q9NX2 | NHP2    | sp Q9NX2 | 1 | 6  | 6  | 6  | 54  | 17.201 | 586710000  | 684050000  | 601910000  | 546790000  | 795080000  | 899060000  |
| sp Q9NX4 | OCIAD1  | sp Q9NX4 | 1 | 7  | 7  | 7  | 28  | 27.626 | 528950000  | 830380000  | 694440000  | 583490000  | 655240000  | 511600000  |
| sp Q9NX4 | ADPRHL2 | sp Q9NX4 | 1 | 3  | 3  | 3  | 13  | 38.946 | 0          | 0          | 0          | 0          | 107840000  | 0          |
| sp Q9NX4 | MARCH5  | sp Q9NX4 | 1 | 2  | 2  | 2  | 10  | 31.231 | 0          | 0          | 0          | 0          | 0          | 180970000  |
| sp Q9NX5 | HYPK    | sp Q9NX5 | 1 | 3  | 3  | 3  | 36  | 14.665 | 629560000  | 547520000  | 424620000  | 505930000  | 475990000  | 487970000  |
| sp Q9NX5 | LYAR    | sp Q9NX5 | 1 | 8  | 8  | 8  | 33  | 43.614 | 517080000  | 535960000  | 845070000  | 464010000  | 688480000  | 0          |
| sp Q9NX6 | IMPAD1  | sp Q9NX6 | 1 | 4  | 4  | 4  | 13  | 38.681 | 0          | 86910000   | 148750000  | 0          | 136760000  | 0          |
| sp Q9NX6 | CHCHD3  | sp Q9NX6 | 1 | 7  | 7  | 7  | 29  | 26.152 | 1890800000 | 1828600000 | 1585200000 | 1856900000 | 1729900000 | 1897600000 |
| sp Q9NX7 | DUS2    | sp Q9NX7 | 1 | 2  | 2  | 2  | 6.1 | 55.05  | 0          | 0          | 0          | 0          | 0          | 21545000   |
| sp Q9NX7 | CMTM6   | sp Q9NX7 | 1 | 1  | 1  | 1  | 5.5 | 20.419 | 0          | 0          | 0          | 0          | 0          | 92160000   |
| sp Q9NXC | SMPD4   | sp Q9NXC | 1 | 3  | 3  | 3  | 5.3 | 97.809 | 200090000  | 0          | 168080000  | 134960000  | 188890000  | 0          |
| sp Q9NXC | TEX10   | sp Q9NXC | 1 | 7  | 7  | 7  | 10  | 105.67 | 217060000  | 242690000  | 221880000  | 302680000  | 231110000  | 269520000  |
| sp Q9NXC | THUMPD  | sp Q9NXC | 1 | 9  | 9  | 9  | 38  | 39.315 | 685320000  | 626870000  | 881550000  | 593430000  | 677780000  | 597900000  |
| sp Q9NXH | TOR4A   | sp Q9NXH | 1 | 2  | 2  | 2  | 7.1 | 46.914 | 0          | 0          | 0          | 0          | 0          | 52735000   |
| sp Q9NXH | TRMT1   | sp Q9NXH | 1 | 13 | 13 | 13 | 29  | 72.233 | 629640000  | 769460000  | 738580000  | 777020000  | 799600000  | 622040000  |
| sp Q9NXV | CDKN2A1 | sp Q9NXV | 1 | 3  | 3  | 3  | 6.9 | 61.124 | 268960000  | 159620000  | 108990000  | 162070000  | 0          | 0          |
| sp Q9NXV | DNAJB12 | sp Q9NXV | 1 | 5  | 5  | 5  | 15  | 41.818 | 174080000  | 139510000  | 142690000  | 161530000  | 194740000  | 166240000  |
| sp Q9NY1 | GAR1    | sp Q9NY1 | 1 | 5  | 5  | 5  | 28  | 22.348 | 501710000  | 454440000  | 465710000  | 482910000  | 616920000  | 537940000  |
| sp Q9NY2 | PPP4R2  | sp Q9NY2 | 1 | 7  | 7  | 7  | 24  | 46.898 | 249770000  | 390960000  | 331170000  | 345490000  | 353740000  | 299570000  |
| sp Q9NY3 | DPP3    | sp Q9NY3 | 1 | 14 | 14 | 14 | 28  | 82.588 | 848280000  | 981510000  | 804150000  | 1012600000 | 1026100000 | 949740000  |
| sp Q9NY6 | AATF    | sp Q9NY6 | 1 | 4  | 4  | 4  | 12  | 63.132 | 165640000  | 119780000  | 95451000   | 127520000  | 92205000   | 146960000  |
| sp Q9NY9 | DDX56   | sp Q9NY9 | 1 | 5  | 5  | 5  | 11  | 61.589 | 322590000  | 446080000  | 0          | 312240000  | 313160000  | 406310000  |
| sp Q9NYE | TERF2IP | sp Q9NYE | 1 | 1  | 1  | 1  | 4.3 | 44.259 | 0          | 0          | 0          | 0          | 0          | 26039000   |
| sp Q9NYE | ABI2    | sp Q9NYE | 1 | 2  | 2  | 2  | 5.8 | 55.663 | 0          | 0          | 0          | 0          | 63111000   | 0          |
| sp Q9NYF | BCLAF1  | sp Q9NYF | 1 | 14 | 13 | 13 | 18  | 106.12 | 2424700000 | 1936700000 | 1966400000 | 2007600000 | 2194100000 | 1854000000 |
| sp Q9NYH | UTP6    | sp Q9NYH | 1 | 7  | 7  | 7  | 15  | 70.193 | 279090000  | 294690000  | 334360000  | 364310000  | 290280000  | 253410000  |
| sp Q9NYJ | COA4    | sp Q9NYJ | 1 | 2  | 2  | 2  | 25  | 10.134 | 159790000  | 195980000  | 134100000  | 187300000  | 249080000  | 258290000  |
| sp Q9NYK | MRPL39  | sp Q9NYK | 1 | 5  | 5  | 5  | 15  | 38.711 | 300120000  | 0          | 248880000  | 238470000  | 236570000  | 268240000  |
| sp Q9NYL | MAP3K20 | sp Q9NYL | 1 | 2  | 2  | 2  | 4.1 | 91.154 | 0          | 0          | 0          | 0          | 38167000   | 0          |
| sp Q9NYL | FKBP11  | sp Q9NYL | 1 | 3  | 3  | 3  | 18  | 22.18  | 131450000  | 216640000  | 0          | 234150000  | 0          | 0          |
| sp Q9NYL | TMOD3   | sp Q9NYL | 2 | 17 | 17 | 17 | 56  | 39.594 | 2190600000 | 2741500000 | 1875600000 | 1999300000 | 2058400000 | 1785800000 |
| sp Q9NYF | ELOVL5  | sp Q9NYF | 1 | 2  | 2  | 2  | 7.4 | 35.293 | 96251000   | 94599000   | 156250000  | 73641000   | 88226000   | 106120000  |
| sp Q9NYU | UGGT1   | sp Q9NYU | 1 | 25 | 25 | 24 | 22  | 177.19 | 994790000  | 1140800000 | 1195000000 | 1227900000 | 1196800000 | 1391800000 |
| sp Q9NYY | FASTKD2 | sp Q9NYY | 1 | 6  | 6  | 6  | 12  | 81.462 | 226070000  | 191950000  | 141210000  | 193390000  | 144020000  | 252810000  |
| sp Q9NZ0 | TECR    | sp Q9NZ0 | 1 | 9  | 9  | 9  | 23  | 36.034 | 2676000000 | 2489000000 | 2618200000 | 3283300000 | 2594300000 | 3225000000 |
| sp Q9NZ0 | ERAP1   | sp Q9NZ0 | 1 | 6  | 6  | 6  | 13  | 107.23 | 96263000   | 0          | 105620000  | 134740000  | 107540000  | 103150000  |
| sp Q9NZ0 | UBAP1   | sp Q9NZ0 | 1 | 3  | 3  | 3  | 12  | 55.083 | 62488000   | 0          | 50722000   | 148010000  | 0          | 0          |
| sp Q9NZ3 | ACTR10  | sp Q9NZ3 | 1 | 3  | 3  | 3  | 9.4 | 46.306 | 0          | 191520000  | 117540000  | 129780000  | 149920000  | 0          |

|                  |           |   |    |    |    |     |        |            |            |            |            |            |            |
|------------------|-----------|---|----|----|----|-----|--------|------------|------------|------------|------------|------------|------------|
| sp Q9NZ4 PSENE   | sp Q9NZ4  | 1 | 1  | 1  | 1  | 15  | 12.029 | 0          | 0          | 0          | 0          | 0          | 65146000   |
| sp Q9NZ4 USE1    | sp Q9NZ4  | 1 | 1  | 1  | 1  | 6.2 | 29.371 | 0          | 0          | 23699000   | 0          | 0          | 0          |
| sp Q9NZ4 CISD1   | sp Q9NZ4  | 1 | 4  | 4  | 4  | 44  | 12.199 | 805640000  | 757060000  | 889390000  | 854000000  | 945230000  | 976410000  |
| sp Q9NZ6 C9orf78 | sp Q9NZ6  | 1 | 6  | 6  | 6  | 27  | 33.688 | 504350000  | 643410000  | 532140000  | 459240000  | 545060000  | 692790000  |
| sp Q9NZE FAM120A | sp Q9NZE  | 3 | 28 | 28 | 28 | 35  | 121.89 | 3727500000 | 3239900000 | 3374800000 | 2719700000 | 3047700000 | 3369500000 |
| sp Q9NZC GDE1    | sp Q9NZC  | 1 | 1  | 1  | 1  | 4.5 | 37.718 | 0          | 0          | 0          | 0          | 0          | 61165000   |
| sp Q9NZD GLTP    | sp Q9NZD  | 1 | 1  | 1  | 1  | 7.2 | 23.85  | 0          | 0          | 0          | 0          | 0          | 2657000    |
| sp Q9NZD SPG21   | sp Q9NZD  | 1 | 6  | 6  | 6  | 25  | 34.96  | 214570000  | 257120000  | 293140000  | 286270000  | 171630000  | 196700000  |
| sp Q9NZI IGF2BP1 | sp Q9NZI  | 3 | 16 | 14 | 14 | 34  | 63.48  | 1549700000 | 1613500000 | 1296600000 | 1685600000 | 1874100000 | 2120600000 |
| sp Q9NZJ COQ3    | sp Q9NZJ  | 1 | 1  | 1  | 1  | 4.6 | 41.054 | 0          | 0          | 0          | 0          | 0          | 49826000   |
| sp Q9NZJ MTCH1   | sp Q9NZJ  | 1 | 5  | 5  | 5  | 17  | 41.544 | 315700000  | 295040000  | 532000000  | 364770000  | 301650000  | 316680000  |
| sp Q9NZL HSPBP1  | sp Q9NZL  | 1 | 9  | 9  | 9  | 34  | 39.474 | 515030000  | 599370000  | 680890000  | 538630000  | 521820000  | 667260000  |
| sp Q9NZL MAT2B   | sp Q9NZL  | 1 | 13 | 13 | 13 | 48  | 37.551 | 1007600000 | 1305100000 | 1038900000 | 882170000  | 955910000  | 1135800000 |
| sp Q9NZM MYOF    | sp Q9NZM  | 3 | 73 | 73 | 73 | 44  | 234.71 | 9199500000 | 8647100000 | 8692900000 | 8586700000 | 8774400000 | 9024900000 |
| sp Q9NZM NOP53   | sp Q9NZM  | 1 | 4  | 4  | 4  | 18  | 54.389 | 57486000   | 0          | 75627000   | 82150000   | 0          | 0          |
| sp Q9NZN EHD2    | sp Q9NZN  | 1 | 20 | 19 | 18 | 58  | 61.161 | 3565100000 | 3724000000 | 3810300000 | 4109900000 | 2931300000 | 3298200000 |
| sp Q9NZC NCKIPSD | sp Q9NZC  | 1 | 4  | 4  | 4  | 7.5 | 78.959 | 91425000   | 86781000   | 0          | 0          | 0          | 0          |
| sp Q9NZT OGFR    | sp Q9NZT  | 1 | 11 | 11 | 11 | 37  | 73.324 | 485020000  | 359330000  | 416910000  | 419670000  | 456230000  | 419150000  |
| sp Q9NZV MPP6    | sp Q9NZV  | 1 | 2  | 2  | 2  | 4.3 | 61.116 | 0          | 0          | 0          | 0          | 84851000   | 0          |
| sp Q9NZZ CHMP5   | sp Q9NZZ  | 1 | 3  | 3  | 3  | 24  | 24.57  | 538610000  | 596690000  | 477830000  | 406930000  | 437740000  | 459360000  |
| sp Q9P00 COMMD9  | sp Q9P00  | 1 | 6  | 6  | 6  | 48  | 21.819 | 261550000  | 354670000  | 422060000  | 256220000  | 247100000  | 161650000  |
| sp Q9P00 CNIH4   | sp Q9P00  | 1 | 1  | 1  | 1  | 14  | 16.093 | 337390000  | 0          | 0          | 454030000  | 0          | 0          |
| sp Q9P01 CWC15   | sp Q9P01  | 1 | 2  | 2  | 2  | 15  | 26.624 | 138530000  | 130880000  | 122220000  | 89906000   | 140700000  | 105510000  |
| sp Q9P01 MRPL15  | sp Q9P01  | 1 | 2  | 2  | 2  | 8.1 | 33.419 | 0          | 0          | 0          | 0          | 0          | 48451000   |
| sp Q9P01 THYN1   | sp Q9P01  | 1 | 3  | 3  | 3  | 12  | 25.697 | 72787000   | 132220000  | 128980000  | 112170000  | 147100000  | 145210000  |
| sp Q9P02 CRIPT   | sp Q9P02  | 1 | 1  | 1  | 1  | 11  | 11.216 | 0          | 0          | 0          | 0          | 0          | 36897000   |
| sp Q9P03 HACD3   | sp Q9P03  | 1 | 6  | 6  | 6  | 20  | 43.159 | 1407800000 | 1335700000 | 1450200000 | 1567700000 | 1275700000 | 1779100000 |
| sp Q9P0I2 EMC3   | sp Q9P0I2 | 1 | 6  | 6  | 6  | 29  | 29.952 | 215310000  | 213430000  | 215550000  | 286500000  | 257550000  | 205930000  |
| sp Q9P0J NDUFA13 | sp Q9P0J  | 1 | 3  | 3  | 3  | 16  | 16.698 | 130400000  | 249620000  | 197850000  | 124850000  | 98252000   | 82829000   |
| sp Q9P0J KCMF1   | sp Q9P0J  | 1 | 2  | 2  | 2  | 7.3 | 41.945 | 0          | 0          | 0          | 110680000  | 45840000   | 0          |
| sp Q9P0K RAI14   | sp Q9P0K  | 1 | 12 | 12 | 12 | 20  | 110.04 | 476590000  | 336030000  | 0          | 406440000  | 438200000  | 314080000  |
| sp Q9P0L VAPA    | sp Q9P0L  | 1 | 12 | 12 | 11 | 53  | 27.893 | 5157400000 | 5325400000 | 4536600000 | 5710200000 | 7311900000 | 5744000000 |
| sp Q9P0M MRPL27  | sp Q9P0M  | 1 | 3  | 3  | 3  | 28  | 16.073 | 0          | 0          | 0          | 0          | 0          | 130120000  |
| sp Q9P0P RNF181  | sp Q9P0P  | 1 | 1  | 1  | 1  | 5.9 | 17.909 | 0          | 0          | 0          | 0          | 29001000   | 0          |
| sp Q9P0S TMEM14C | sp Q9P0S  | 1 | 1  | 1  | 1  | 8.9 | 11.564 | 0          | 0          | 0          | 0          | 0          | 382440000  |
| sp Q9P0T TMEM9   | sp Q9P0T  | 1 | 2  | 2  | 2  | 18  | 20.574 | 0          | 0          | 0          | 0          | 0          | 209520000  |
| sp Q9P0U TOMM7   | sp Q9P0U  | 1 | 2  | 2  | 2  | 44  | 6.2484 | 0          | 0          | 0          | 302910000  | 535410000  | 0          |
| sp Q9P0V SH3BP4  | sp Q9P0V  | 1 | 4  | 4  | 4  | 6   | 107.49 | 0          | 0          | 0          | 0          | 61814000   | 0          |
| sp Q9P0V SEPT10  | sp Q9P0V  | 1 | 10 | 9  | 9  | 36  | 52.592 | 601180000  | 518690000  | 495970000  | 538070000  | 498170000  | 522750000  |

|                   |          |   |    |    |    |     |        |            |            |            |            |            |            |
|-------------------|----------|---|----|----|----|-----|--------|------------|------------|------------|------------|------------|------------|
| sp Q9P0V HMG20B   | sp Q9P0V | 1 | 1  | 1  | 1  | 7.6 | 35.812 | 0          | 0          | 0          | 0          | 0          | 6253700    |
| sp Q9P1F ABRACL   | sp Q9P1F | 1 | 2  | 2  | 2  | 36  | 9.0564 | 218200000  | 347970000  | 357280000  | 246190000  | 260840000  | 0          |
| sp Q9P25 VPS18    | sp Q9P25 | 1 | 1  | 1  | 1  | 1.5 | 110.18 | 0          | 0          | 0          | 0          | 46520000   | 0          |
| sp Q9P25 RCC2     | sp Q9P25 | 1 | 17 | 17 | 17 | 45  | 56.084 | 6380300000 | 6210500000 | 5899100000 | 6308000000 | 5562700000 | 5749300000 |
| sp Q9P26 KIAA1468 | sp Q9P26 | 1 | 1  | 1  | 1  | 1.9 | 134.63 | 0          | 0          | 0          | 0          | 0          | 0          |
| sp Q9P26 DIP2B    | sp Q9P26 | 1 | 6  | 6  | 6  | 6.5 | 171.49 | 160700000  | 0          | 196310000  | 118140000  | 118890000  | 148140000  |
| sp Q9P28 BCCIP    | sp Q9P28 | 1 | 7  | 7  | 7  | 31  | 35.979 | 1559200000 | 1284000000 | 1423400000 | 1199900000 | 1110200000 | 1430500000 |
| sp Q9P28 STK26    | sp Q9P28 | 2 | 10 | 10 | 5  | 30  | 46.528 | 749110000  | 777860000  | 669360000  | 707650000  | 754140000  | 885630000  |
| sp Q9P2B PTGFRN   | sp Q9P2B | 1 | 3  | 3  | 3  | 3.8 | 98.555 | 0          | 0          | 0          | 0          | 111160000  | 0          |
| sp Q9P2B CTTNBP2  | sp Q9P2B | 1 | 2  | 2  | 2  | 6.9 | 70.157 | 0          | 0          | 0          | 159670000  | 0          | 0          |
| sp Q9P2E RRBP1    | sp Q9P2E | 2 | 35 | 35 | 35 | 33  | 152.45 | 3348800000 | 3201100000 | 3491600000 | 2973200000 | 3375900000 | 3404500000 |
| sp Q9P2I CPSF2    | sp Q9P2I | 1 | 4  | 4  | 4  | 7.2 | 88.486 | 193870000  | 0          | 0          | 0          | 115290000  | 0          |
| sp Q9P2J LARS     | sp Q9P2J | 1 | 36 | 36 | 36 | 38  | 134.46 | 5053000000 | 4990500000 | 4840500000 | 5125100000 | 4982200000 | 5268300000 |
| sp Q9P2K EIF2AK4  | sp Q9P2K | 1 | 2  | 2  | 2  | 1.5 | 186.91 | 0          | 0          | 0          | 0          | 0          | 30029000   |
| sp Q9P2N RBM27    | sp Q9P2N | 1 | 5  | 4  | 4  | 7.6 | 118.72 | 219700000  | 173380000  | 161560000  | 203930000  | 165300000  | 228860000  |
| sp Q9P2R ANKFY1   | sp Q9P2R | 1 | 8  | 8  | 8  | 10  | 128.4  | 516780000  | 497000000  | 468000000  | 658700000  | 553800000  | 432170000  |
| sp Q9P2R SUCLA2   | sp Q9P2R | 1 | 12 | 12 | 12 | 33  | 50.317 | 1034000000 | 1165000000 | 868530000  | 1070700000 | 1646200000 | 1313000000 |
| sp Q9P2T GMPR2    | sp Q9P2T | 1 | 3  | 3  | 3  | 13  | 37.874 | 0          | 0          | 82091000   | 0          | 44337000   | 40203000   |
| sp Q9P2V STX18    | sp Q9P2V | 1 | 1  | 1  | 1  | 3.6 | 38.673 | 0          | 0          | 0          | 0          | 0          | 3188100    |
| sp Q9P2X DPM3     | sp Q9P2X | 1 | 1  | 1  | 1  | 13  | 10.094 | 166350000  | 292170000  | 176720000  | 0          | 311440000  | 312480000  |
| sp Q9UBE ATXN10   | sp Q9UBE | 1 | 16 | 16 | 16 | 41  | 53.488 | 2711400000 | 2692100000 | 2783000000 | 1795400000 | 1748000000 | 1812700000 |
| sp Q9UBE MBD2     | sp Q9UBE | 1 | 4  | 4  | 4  | 20  | 43.254 | 0          | 384820000  | 354930000  | 0          | 518540000  | 0          |
| sp Q9UBE NCDN     | sp Q9UBE | 1 | 8  | 8  | 8  | 18  | 78.863 | 132590000  | 0          | 0          | 171170000  | 178620000  | 172190000  |
| sp Q9UBC EPS15L1  | sp Q9UBC | 1 | 7  | 7  | 7  | 11  | 94.254 | 236840000  | 226640000  | 246640000  | 267870000  | 273970000  | 243130000  |
| sp Q9UBC ORC3     | sp Q9UBC | 1 | 4  | 4  | 4  | 8.4 | 82.253 | 190620000  | 154270000  | 133750000  | 129860000  | 138370000  | 142230000  |
| sp Q9UBE SAE1     | sp Q9UBE | 1 | 11 | 11 | 11 | 41  | 38.449 | 1123100000 | 1083700000 | 1157700000 | 1084600000 | 1235100000 | 1168400000 |
| sp Q9UBF COPG2    | sp Q9UBF | 1 | 8  | 4  | 4  | 14  | 97.621 | 79823000   | 100060000  | 124940000  | 84348000   | 100580000  | 83873000   |
| sp Q9UBF RNF7     | sp Q9UBF | 1 | 1  | 1  | 1  | 20  | 12.683 | 0          | 0          | 0          | 0          | 0          | 35522000   |
| sp Q9UBC MRC2     | sp Q9UBC | 1 | 2  | 2  | 2  | 2.8 | 166.67 | 0          | 57009000   | 0          | 0          | 0          | 0          |
| sp Q9UBI COMMD3   | sp Q9UBI | 1 | 3  | 3  | 3  | 22  | 22.151 | 0          | 0          | 0          | 0          | 0          | 102900000  |
| sp Q9UBI GNG12    | sp Q9UBI | 1 | 3  | 3  | 3  | 57  | 8.0061 | 2014400000 | 1713100000 | 1523600000 | 1478500000 | 2448900000 | 1639700000 |
| sp Q9UBK MTRR     | sp Q9UBK | 1 | 5  | 5  | 5  | 11  | 80.409 | 534940000  | 600640000  | 377130000  | 353670000  | 334080000  | 346670000  |
| sp Q9UBL ASH2L    | sp Q9UBL | 1 | 3  | 3  | 3  | 6.7 | 68.722 | 0          | 0          | 0          | 43837000   | 46940000   | 0          |
| sp Q9UBN PEMT     | sp Q9UBN | 1 | 1  | 1  | 1  | 6.5 | 22.134 | 0          | 0          | 0          | 0          | 30154000   | 0          |
| sp Q9UBN DHCR7    | sp Q9UBN | 1 | 5  | 5  | 5  | 13  | 54.489 | 1234900000 | 669650000  | 1148300000 | 957640000  | 811900000  | 1013300000 |
| sp Q9UBF SPAST    | sp Q9UBF | 1 | 1  | 1  | 1  | 3.9 | 67.196 | 0          | 0          | 0          | 0          | 0          | 29532000   |
| sp Q9UBF METT1    | sp Q9UBF | 1 | 3  | 3  | 3  | 26  | 31.471 | 0          | 0          | 255840000  | 0          | 380520000  | 0          |
| sp Q9UBF GULP1    | sp Q9UBF | 1 | 3  | 3  | 3  | 9.2 | 34.49  | 0          | 0          | 311750000  | 0          | 0          | 259200000  |
| sp Q9UBC VPS29    | sp Q9UBC | 1 | 6  | 6  | 6  | 33  | 20.505 | 1227200000 | 1476000000 | 1308500000 | 1125100000 | 1326100000 | 1343900000 |

|          |         |          |   |    |    |    |     |        |            |            |            |            |            |            |
|----------|---------|----------|---|----|----|----|-----|--------|------------|------------|------------|------------|------------|------------|
| sp Q9UBC | EIF3K   | sp Q9UBC | 1 | 6  | 6  | 6  | 34  | 25.059 | 2090600000 | 1793700000 | 1735200000 | 1838800000 | 2051000000 | 1911600000 |
| sp Q9UBC | GRHPR   | sp Q9UBC | 1 | 10 | 10 | 10 | 46  | 35.668 | 1911900000 | 2596700000 | 2404100000 | 2032200000 | 2136200000 | 2500200000 |
| sp Q9UBF | CTSZ    | sp Q9UBF | 1 | 6  | 6  | 6  | 24  | 33.868 | 427760000  | 596720000  | 379750000  | 414770000  | 463270000  | 471100000  |
| sp Q9UBS | DNAJB11 | sp Q9UBS | 1 | 9  | 9  | 9  | 29  | 40.513 | 1059600000 | 908330000  | 1157100000 | 1390000000 | 1296800000 | 1183700000 |
| sp Q9UBT | UBA2    | sp Q9UBT | 1 | 21 | 21 | 21 | 47  | 71.223 | 2886100000 | 3213200000 | 3106800000 | 2767300000 | 3159500000 | 2400800000 |
| sp Q9UBL | MORF4L1 | sp Q9UBL | 1 | 7  | 7  | 6  | 31  | 41.473 | 537700000  | 476300000  | 350140000  | 282250000  | 395970000  | 0          |
| sp Q9UBL | NXF1    | sp Q9UBL | 1 | 11 | 11 | 11 | 25  | 70.182 | 668640000  | 697970000  | 724060000  | 527130000  | 606150000  | 838300000  |
| sp Q9UBV | SEL1L   | sp Q9UBV | 1 | 3  | 3  | 3  | 6   | 88.754 | 135560000  | 0          | 100590000  | 156960000  | 126230000  | 88961000   |
| sp Q9UBV | PEF1    | sp Q9UBV | 1 | 3  | 3  | 3  | 12  | 30.381 | 0          | 0          | 0          | 0          | 193970000  | 0          |
| sp Q9UBV | COPS7A  | sp Q9UBV | 1 | 7  | 7  | 7  | 34  | 30.276 | 342040000  | 357300000  | 419460000  | 434630000  | 442890000  | 327980000  |
| sp Q9UBX | SLC25A1 | sp Q9UBX | 1 | 8  | 8  | 8  | 37  | 31.282 | 864530000  | 511480000  | 723250000  | 804240000  | 1007300000 | 943180000  |
| sp Q9UDV | UQCR10  | sp Q9UDV | 1 | 2  | 2  | 2  | 38  | 7.3084 | 408070000  | 0          | 415300000  | 0          | 364980000  | 0          |
| sp Q9UDY | TJP2    | sp Q9UDY | 1 | 7  | 7  | 7  | 6.8 | 133.96 | 477120000  | 416030000  | 334290000  | 364640000  | 323100000  | 442970000  |
| sp Q9UDY | DNAJB4  | sp Q9UDY | 1 | 11 | 10 | 10 | 40  | 37.806 | 1026300000 | 1002200000 | 855010000  | 901300000  | 988110000  | 1067800000 |
| sp Q9UDY | MALT1   | sp Q9UDY | 1 | 2  | 2  | 2  | 3.8 | 92.271 | 0          | 0          | 0          | 0          | 0          | 45513000   |
| sp Q9UEF | DAXX    | sp Q9UEF | 1 | 3  | 3  | 3  | 8.9 | 81.372 | 0          | 0          | 0          | 0          | 53689000   | 0          |
| sp Q9UEL | VTI1B   | sp Q9UEL | 1 | 2  | 2  | 2  | 13  | 26.688 | 35510000   | 0          | 46236000   | 0          | 53632000   | 0          |
| sp Q9UEV | STK39   | sp Q9UEV | 1 | 4  | 2  | 2  | 9.4 | 59.473 | 0          | 0          | 0          | 58318000   | 0          | 0          |
| sp Q9UEY | ADD3    | sp Q9UEY | 1 | 5  | 5  | 5  | 11  | 79.154 | 191340000  | 244750000  | 190040000  | 161390000  | 180850000  | 193470000  |
| sp Q9UFC | LRWD1   | sp Q9UFC | 1 | 5  | 5  | 5  | 12  | 70.86  | 159500000  | 238480000  | 128490000  | 284140000  | 206190000  | 163270000  |
| sp Q9UFN | NIPSNAP | sp Q9UFN | 1 | 1  | 1  | 1  | 7.3 | 28.466 | 0          | 0          | 0          | 0          | 0          | 10955000   |
| sp Q9UFV | CGGBP1  | sp Q9UFV | 1 | 1  | 1  | 1  | 6   | 18.82  | 0          | 0          | 0          | 0          | 0          | 119870000  |
| sp Q9UG6 | ABCF2   | sp Q9UG6 | 1 | 15 | 15 | 15 | 29  | 71.289 | 1673700000 | 1693300000 | 2035700000 | 1904600000 | 1594900000 | 1594700000 |
| sp Q9UGI | TES     | sp Q9UGI | 1 | 19 | 19 | 19 | 54  | 47.996 | 2794600000 | 2966500000 | 2571100000 | 2890100000 | 2934200000 | 2959300000 |
| sp Q9UGJ | TUBGCP4 | sp Q9UGJ | 1 | 3  | 3  | 3  | 6.9 | 76.088 | 102810000  | 121280000  | 126880000  | 0          | 0          | 113640000  |
| sp Q9UGN | WARS2   | sp Q9UGN | 1 | 2  | 2  | 2  | 7.2 | 40.146 | 0          | 0          | 0          | 0          | 35675000   | 0          |
| sp Q9UGF | LIMD1   | sp Q9UGF | 1 | 2  | 2  | 2  | 4.4 | 72.189 | 93812000   | 67384000   | 0          | 68844000   | 0          | 85538000   |
| sp Q9UGF | SEC63   | sp Q9UGF | 1 | 12 | 12 | 12 | 23  | 87.996 | 759880000  | 842200000  | 714070000  | 970160000  | 1154300000 | 1184800000 |
| sp Q9UGF | ZC3H7B  | sp Q9UGF | 1 | 1  | 1  | 1  | 1.1 | 111.58 | 0          | 0          | 0          | 0          | 0          | 17197000   |
| sp Q9UGU | TCF20   | sp Q9UGU | 1 | 2  | 2  | 2  | 1.5 | 211.77 | 0          | 0          | 0          | 0          | 29278000   | 0          |
| sp Q9UGV | NDRG3   | sp Q9UGV | 1 | 4  | 4  | 4  | 18  | 41.408 | 215480000  | 289760000  | 187130000  | 0          | 204050000  | 171420000  |
| sp Q9UGY | NOL12   | sp Q9UGY | 1 | 1  | 1  | 1  | 5.6 | 24.663 | 0          | 24171000   | 0          | 0          | 0          | 0          |
| sp Q9UH6 | ARMCX3  | sp Q9UH6 | 1 | 4  | 4  | 4  | 17  | 42.5   | 202320000  | 174710000  | 141190000  | 172220000  | 206940000  | 157940000  |
| sp Q9UH6 | SWAP70  | sp Q9UH6 | 1 | 6  | 6  | 6  | 13  | 68.997 | 252190000  | 258880000  | 189830000  | 258000000  | 238730000  | 191450000  |
| sp Q9UH9 | SUN2    | sp Q9UH9 | 1 | 6  | 6  | 6  | 13  | 80.31  | 102230000  | 162300000  | 133530000  | 89716000   | 74856000   | 92750000   |
| sp Q9UHA | LAMTOR3 | sp Q9UHA | 1 | 3  | 3  | 3  | 44  | 13.623 | 187270000  | 433010000  | 248430000  | 236320000  | 253620000  | 311840000  |
| sp Q9UHE | LIMA1   | sp Q9UHE | 1 | 10 | 10 | 10 | 17  | 85.225 | 836090000  | 851830000  | 742340000  | 708360000  | 753980000  | 782370000  |
| sp Q9UHE | AFF4    | sp Q9UHE | 1 | 1  | 1  | 1  | 1.5 | 127.46 | 0          | 0          | 0          | 0          | 0          | 29154000   |
| sp Q9UHE | SRP68   | sp Q9UHE | 1 | 13 | 13 | 13 | 28  | 70.729 | 1279500000 | 1249900000 | 1376400000 | 1232800000 | 1270500000 | 1333100000 |

|                   |           |   |    |    |    |     |        |            |            |            |            |            |            |
|-------------------|-----------|---|----|----|----|-----|--------|------------|------------|------------|------------|------------|------------|
| sp Q9UHL CHORDC   | sp Q9UHL  | 1 | 14 | 14 | 14 | 55  | 37.489 | 4695900000 | 5042200000 | 5620500000 | 4920900000 | 6452300000 | 5063600000 |
| sp Q9UHL TBK1     | sp Q9UHL  | 1 | 2  | 2  | 2  | 4.8 | 83.641 | 0          | 0          | 0          | 0          | 0          | 38884000   |
| sp Q9UHL SEPT9    | sp Q9UHL  | 1 | 23 | 23 | 23 | 47  | 65.401 | 3898500000 | 4441200000 | 3956000000 | 3655600000 | 3639100000 | 3805800000 |
| sp Q9UHL UBQLN2   | sp Q9UHL  | 1 | 9  | 6  | 6  | 27  | 65.695 | 1149700000 | 9932900000 | 1282800000 | 7974800000 | 8059300000 | 7325800000 |
| sp Q9UHL PCYOX1   | sp Q9UHL  | 1 | 10 | 10 | 10 | 25  | 56.639 | 6961600000 | 9334900000 | 7794900000 | 8398300000 | 7815900000 | 6896300000 |
| sp Q9UHL DDX20    | sp Q9UHL  | 1 | 10 | 10 | 10 | 19  | 92.239 | 2084000000 | 3581800000 | 3928400000 | 5461700000 | 6667900000 | 4037900000 |
| sp Q9UHL AMACR    | sp Q9UHL  | 1 | 2  | 2  | 2  | 7.6 | 42.386 | 0          | 0          | 0          | 0          | 46381000   | 0          |
| sp Q9UHL TMEM2    | sp Q9UHL  | 1 | 1  | 1  | 1  | 1   | 154.37 | 0          | 0          | 0          | 31086000   | 0          | 0          |
| sp Q9UHL CYB5R1   | sp Q9UHL  | 1 | 6  | 6  | 6  | 22  | 34.094 | 1295600000 | 1259600000 | 1349500000 | 1652000000 | 1915500000 | 1822100000 |
| sp Q9UHL BAIAP2L1 | sp Q9UHL  | 1 | 3  | 3  | 3  | 8.4 | 56.882 | 1202400000 | 0          | 0          | 1227000000 | 1264700000 | 0          |
| sp Q9UHL SAP30BP  | sp Q9UHL  | 1 | 2  | 2  | 2  | 8.4 | 33.87  | 0          | 91083000   | 0          | 96887000   | 0          | 1264600000 |
| sp Q9UHL ZNHIT2   | sp Q9UHL  | 1 | 4  | 4  | 4  | 12  | 42.883 | 0          | 115510000  | 0          | 0          | 0          | 0          |
| sp Q9UHL PFDN2    | sp Q9UHL  | 1 | 6  | 6  | 6  | 40  | 16.648 | 1393200000 | 1763900000 | 1055000000 | 1690900000 | 1736300000 | 1665500000 |
| sp Q9UHL GPN3     | sp Q9UHL  | 1 | 1  | 1  | 1  | 6.3 | 32.761 | 0          | 0          | 0          | 0          | 0          | 18015000   |
| sp Q9UHL PUF60    | sp Q9UHL  | 1 | 18 | 18 | 18 | 39  | 59.875 | 4068100000 | 3874200000 | 4501900000 | 3854300000 | 3923800000 | 3476800000 |
| sp Q9UHL NRBP1    | sp Q9UHL  | 1 | 5  | 5  | 5  | 13  | 59.844 | 1322700000 | 1449600000 | 1667100000 | 96143000   | 74374000   | 1352600000 |
| sp Q9UHL ENOPH1   | sp Q9UHL  | 1 | 4  | 4  | 4  | 28  | 28.932 | 3000700000 | 3201000000 | 2185900000 | 2166000000 | 2268400000 | 1665900000 |
| sp Q9UI09 NDUFA12 | sp Q9UI09 | 1 | 2  | 2  | 2  | 17  | 17.114 | 1018000000 | 950800000  | 85712000   | 43526000   | 78208000   | 74291000   |
| sp Q9UI10 EIF2B4  | sp Q9UI10 | 1 | 6  | 6  | 6  | 20  | 57.557 | 1500100000 | 1041000000 | 1189100000 | 1657900000 | 0          | 1389600000 |
| sp Q9UI12 ATP6V1H | sp Q9UI12 | 1 | 5  | 5  | 5  | 16  | 55.882 | 3466000000 | 2868800000 | 2878200000 | 2135600000 | 1789300000 | 3377700000 |
| sp Q9UI15 TAGLN3  | sp Q9UI15 | 1 | 2  | 1  | 1  | 14  | 22.472 | 0          | 0          | 0          | 0          | 0          | 32203000   |
| sp Q9UI26 IPO11   | sp Q9UI26 | 1 | 8  | 8  | 8  | 12  | 112.53 | 3222300000 | 3558900000 | 4336200000 | 4593000000 | 3403600000 | 3661800000 |
| sp Q9UI30 TRMT112 | sp Q9UI30 | 1 | 6  | 6  | 6  | 59  | 14.199 | 1822600000 | 2225800000 | 2017800000 | 1616900000 | 1565800000 | 1831400000 |
| sp Q9UIA9 XPO7    | sp Q9UIA9 | 1 | 13 | 13 | 13 | 18  | 123.91 | 6212200000 | 7168400000 | 6558100000 | 6145400000 | 6091200000 | 7662500000 |
| sp Q9UID3 VPS51   | sp Q9UID3 | 1 | 5  | 5  | 5  | 10  | 86.041 | 1655700000 | 1366700000 | 1442700000 | 1785200000 | 1927300000 | 1785500000 |
| sp Q9UIG3 BAZ1B   | sp Q9UIG3 | 1 | 17 | 17 | 17 | 17  | 170.9  | 1111500000 | 1241800000 | 1093400000 | 1058800000 | 1293100000 | 1140800000 |
| sp Q9UII4 HERC5   | sp Q9UII4 | 1 | 2  | 2  | 2  | 2.8 | 116.85 | 0          | 87784000   | 0          | 0          | 76878000   | 0          |
| sp Q9UIJ7 AK3     | sp Q9UIJ7 | 1 | 4  | 4  | 4  | 22  | 25.565 | 0          | 2930500000 | 4026700000 | 4362200000 | 5581700000 | 4352400000 |
| sp Q9UIL7 SCOC    | sp Q9UIL7 | 1 | 2  | 2  | 2  | 28  | 18.045 | 0          | 0          | 0          | 20496000   | 0          | 0          |
| sp Q9UIQ3 LNPEP   | sp Q9UIQ3 | 1 | 6  | 6  | 6  | 8.1 | 117.35 | 2463100000 | 2367000000 | 0          | 1733400000 | 2497800000 | 1757000000 |
| sp Q9UIV3 CNOT7   | sp Q9UIV3 | 1 | 4  | 4  | 4  | 23  | 32.745 | 1445600000 | 1221100000 | 91258000   | 1326100000 | 1187900000 | 2230000000 |
| sp Q9UJ43 RABGEF1 | sp Q9UJ43 | 1 | 3  | 3  | 3  | 6.1 | 79.37  | 0          | 0          | 0          | 0          | 0          | 64939000   |
| sp Q9UJ73 NAGK    | sp Q9UJ73 | 1 | 6  | 6  | 6  | 25  | 37.375 | 2732500000 | 3803100000 | 2544800000 | 3676500000 | 3142100000 | 2998900000 |
| sp Q9UJ73 ANXA10  | sp Q9UJ73 | 1 | 4  | 4  | 4  | 18  | 37.277 | 1233900000 | 64712000   | 99032000   | 1612500000 | 1030900000 | 1239900000 |
| sp Q9UJ83 HACL1   | sp Q9UJ83 | 1 | 6  | 6  | 6  | 17  | 63.728 | 1637800000 | 0          | 0          | 2221100000 | 1677600000 | 0          |
| sp Q9UJA3 TRMT6   | sp Q9UJA3 | 1 | 3  | 3  | 3  | 8.2 | 55.799 | 0          | 0          | 0          | 0          | 0          | 1178800000 |
| sp Q9UJK3 TSR3    | sp Q9UJK3 | 1 | 2  | 2  | 2  | 12  | 33.596 | 0          | 23656000   | 0          | 0          | 0          | 0          |
| sp Q9UJS3 SLC25A1 | sp Q9UJS3 | 1 | 20 | 20 | 17 | 41  | 74.175 | 2735300000 | 2415100000 | 2482700000 | 2773500000 | 2854400000 | 2689000000 |
| sp Q9UJU3 DBNL    | sp Q9UJU3 | 1 | 9  | 9  | 9  | 30  | 48.207 | 8720800000 | 7813100000 | 8700900000 | 1081000000 | 1004000000 | 8393100000 |

|                   |           |   |    |    |    |     |        |           |           |           |           |           |           |
|-------------------|-----------|---|----|----|----|-----|--------|-----------|-----------|-----------|-----------|-----------|-----------|
| sp Q9UJVV DDX41   | sp Q9UJVV | 1 | 2  | 2  | 2  | 5   | 69.837 | 0         | 0         | 0         | 0         | 0         | 33561000  |
| sp Q9UJVV DCTN4   | sp Q9UJVV | 1 | 7  | 7  | 7  | 29  | 52.337 | 266760000 | 278310000 | 235540000 | 251580000 | 238570000 | 241250000 |
| sp Q9UJXX CDC23   | sp Q9UJXX | 1 | 9  | 9  | 9  | 24  | 68.833 | 209350000 | 180480000 | 169790000 | 220630000 | 236820000 | 266810000 |
| sp Q9UJXX ANAPC7  | sp Q9UJXX | 1 | 7  | 7  | 7  | 17  | 66.855 | 305620000 | 298790000 | 345090000 | 251760000 | 299030000 | 329410000 |
| sp Q9UJXX ANAPC5  | sp Q9UJXX | 1 | 3  | 3  | 3  | 6.2 | 85.076 | 0         | 0         | 63139000  | 0         | 0         | 0         |
| sp Q9UJXX ANAPC2  | sp Q9UJXX | 1 | 1  | 1  | 1  | 1.7 | 93.827 | 0         | 0         | 0         | 17264000  | 0         | 0         |
| sp Q9UJYY HSPB8   | sp Q9UJYY | 1 | 3  | 3  | 3  | 19  | 21.604 | 0         | 154400000 | 0         | 0         | 314670000 | 380660000 |
| sp Q9UJZZ STOML2  | sp Q9UJZZ | 1 | 12 | 12 | 12 | 58  | 38.534 | 269280000 | 264180000 | 286910000 | 309060000 | 342990000 | 294350000 |
| sp Q9UK4 VPS28    | sp Q9UK4  | 1 | 4  | 4  | 4  | 26  | 25.425 | 0         | 344670000 | 282650000 | 436490000 | 440980000 | 336140000 |
| sp Q9UK4 LSM7     | sp Q9UK4  | 1 | 2  | 2  | 2  | 33  | 11.602 | 39842000  | 0         | 134540000 | 43072000  | 0         | 214740000 |
| sp Q9UK5 DBR1     | sp Q9UK5  | 1 | 2  | 2  | 2  | 4.4 | 61.554 | 54206000  | 0         | 0         | 0         | 0         | 0         |
| sp Q9UK6 FAM208A  | sp Q9UK6  | 1 | 4  | 4  | 4  | 5.2 | 189.03 | 113130000 | 117420000 | 0         | 0         | 98722000  | 0         |
| sp Q9UK7 JPT1     | sp Q9UK7  | 1 | 5  | 5  | 5  | 64  | 16.014 | 432000000 | 380550000 | 381460000 | 284770000 | 325840000 | 337210000 |
| sp Q9UKL MRTO4    | sp Q9UKL  | 1 | 11 | 11 | 11 | 54  | 27.56  | 293720000 | 224840000 | 241870000 | 225860000 | 215260000 | 272240000 |
| sp Q9UKF CPSF3    | sp Q9UKF  | 1 | 9  | 9  | 9  | 20  | 77.485 | 330180000 | 413270000 | 315140000 | 342580000 | 319720000 | 253090000 |
| sp Q9UKG APPL1    | sp Q9UKG  | 1 | 6  | 6  | 6  | 11  | 79.663 | 71324000  | 110710000 | 0         | 0         | 0         | 0         |
| sp Q9UKI CDC42EP  | sp Q9UKI  | 1 | 2  | 2  | 2  | 13  | 27.678 | 0         | 43455000  | 49370000  | 0         | 33054000  | 0         |
| sp Q9UKK PARP4    | sp Q9UKK  | 1 | 3  | 3  | 3  | 1.5 | 192.59 | 0         | 0         | 0         | 137050000 | 0         | 0         |
| sp Q9UKK NUDT5    | sp Q9UKK  | 1 | 12 | 12 | 12 | 60  | 24.327 | 306440000 | 218100000 | 262940000 | 252310000 | 270450000 | 230720000 |
| sp Q9UKL RCOR1    | sp Q9UKL  | 2 | 2  | 2  | 2  | 7.8 | 53.327 | 64853000  | 235760000 | 166000000 | 0         | 237710000 | 183600000 |
| sp Q9UKN MAN1B1   | sp Q9UKN  | 1 | 1  | 1  | 1  | 2.4 | 79.579 | 0         | 0         | 0         | 0         | 54051000  | 0         |
| sp Q9UKN RALY     | sp Q9UKN  | 1 | 11 | 11 | 11 | 36  | 32.463 | 271270000 | 249540000 | 263350000 | 288260000 | 277730000 | 360950000 |
| sp Q9UKN GTF3C4   | sp Q9UKN  | 1 | 15 | 15 | 15 | 25  | 91.981 | 718650000 | 696730000 | 616450000 | 653440000 | 802990000 | 715570000 |
| sp Q9UKF ERG28    | sp Q9UKF  | 1 | 2  | 2  | 2  | 12  | 15.864 | 0         | 0         | 0         | 0         | 0         | 53879000  |
| sp Q9UKS PACSIN3  | sp Q9UKS  | 1 | 12 | 12 | 12 | 41  | 48.486 | 921350000 | 855170000 | 834400000 | 831570000 | 703480000 | 845050000 |
| sp Q9UKV ACIN1    | sp Q9UKV  | 1 | 18 | 18 | 18 | 20  | 151.86 | 195530000 | 176890000 | 190630000 | 188700000 | 182490000 | 173780000 |
| sp Q9UKV AGO2     | sp Q9UKV  | 4 | 6  | 6  | 6  | 12  | 97.207 | 177610000 | 0         | 198690000 | 89574000  | 133010000 | 104780000 |
| sp Q9UKX NUP50    | sp Q9UKX  | 1 | 9  | 9  | 9  | 29  | 50.144 | 578550000 | 711630000 | 480470000 | 565880000 | 716240000 | 628230000 |
| sp Q9UKY CDV3     | sp Q9UKY  | 1 | 11 | 11 | 11 | 69  | 27.335 | 173830000 | 190600000 | 134520000 | 190480000 | 245910000 | 207190000 |
| sp Q9UL1 BAG5     | sp Q9UL1  | 1 | 3  | 3  | 3  | 8.9 | 51.199 | 67567000  | 29936000  | 91394000  | 72679000  | 62043000  | 105440000 |
| sp Q9UL2 RAB21    | sp Q9UL2  | 1 | 6  | 6  | 6  | 34  | 24.347 | 667610000 | 539420000 | 729150000 | 791500000 | 725680000 | 125120000 |
| sp Q9UL2 RAB22A   | sp Q9UL2  | 1 | 2  | 1  | 1  | 17  | 21.855 | 0         | 0         | 0         | 0         | 0         | 38631000  |
| sp Q9UL4 PNMA2    | sp Q9UL4  | 1 | 1  | 1  | 1  | 2.7 | 41.509 | 0         | 0         | 0         | 0         | 0         | 11205000  |
| sp Q9UL4 PSME2    | sp Q9UL4  | 1 | 11 | 11 | 11 | 52  | 27.401 | 106610000 | 130690000 | 981010000 | 102570000 | 108760000 | 863790000 |
| sp Q9ULA DNPEP    | sp Q9ULA  | 1 | 4  | 4  | 4  | 12  | 52.428 | 148490000 | 128240000 | 169260000 | 147640000 | 0         | 187120000 |
| sp Q9ULC RAB23    | sp Q9ULC  | 1 | 3  | 3  | 3  | 22  | 26.659 | 127380000 | 103910000 | 117390000 | 126770000 | 159550000 | 0         |
| sp Q9ULC MCTS1    | sp Q9ULC  | 1 | 7  | 7  | 7  | 53  | 20.555 | 786700000 | 978950000 | 865410000 | 748050000 | 840280000 | 657130000 |
| sp Q9ULH KIDINS22 | sp Q9ULH  | 1 | 2  | 2  | 2  | 1.6 | 196.54 | 0         | 0         | 683240000 | 0         | 0         | 952590000 |
| sp Q9ULI HEG1     | sp Q9ULI  | 1 | 1  | 1  | 1  | 0.9 | 147.46 | 0         | 0         | 0         | 0         | 0         | 29266000  |



|          |         |          |   |    |    |    |     |        |            |            |            |            |            |            |
|----------|---------|----------|---|----|----|----|-----|--------|------------|------------|------------|------------|------------|------------|
| sp Q9ULK | MED23   | sp Q9ULK | 1 | 1  | 1  | 1  | 1.2 | 156.47 | 0          | 0          | 0          | 0          | 35879000   | 0          |
| sp Q9ULP | TBC1D24 | sp Q9ULP | 1 | 2  | 2  | 2  | 4.7 | 62.919 | 0          | 0          | 0          | 137490000  | 0          | 0          |
| sp Q9ULR | ISY1    | sp Q9ULR | 1 | 4  | 4  | 4  | 21  | 32.992 | 372390000  | 229280000  | 229410000  | 242510000  | 236050000  | 172980000  |
| sp Q9ULT | HECTD1  | sp Q9ULT | 1 | 13 | 13 | 13 | 8.5 | 289.38 | 402970000  | 366010000  | 308010000  | 396690000  | 302830000  | 241900000  |
| sp Q9ULV | CIZ1    | sp Q9ULV | 1 | 1  | 1  | 1  | 1.9 | 100.04 | 0          | 0          | 0          | 0          | 16401000   | 0          |
| sp Q9ULV | CORO1C  | sp Q9ULV | 1 | 18 | 18 | 18 | 45  | 53.248 | 3418100000 | 2763300000 | 3413700000 | 2951700000 | 3545400000 | 3511500000 |
| sp Q9ULV | TPX2    | sp Q9ULV | 1 | 18 | 18 | 18 | 33  | 85.652 | 595660000  | 653870000  | 584350000  | 1113500000 | 1052800000 | 930430000  |
| sp Q9ULX | NOB1    | sp Q9ULX | 1 | 6  | 6  | 6  | 22  | 46.674 | 480630000  | 389850000  | 505190000  | 349190000  | 451830000  | 418530000  |
| sp Q9UM0 | TMCO1   | sp Q9UM0 | 1 | 4  | 4  | 4  | 17  | 21.175 | 410500000  | 439860000  | 318600000  | 296740000  | 356240000  | 449360000  |
| sp Q9UMF | DDX19B  | sp Q9UMF | 1 | 9  | 1  | 1  | 24  | 53.926 | 0          | 0          | 0          | 0          | 0          | 29426000   |
| sp Q9UMS | NFU1    | sp Q9UMS | 1 | 4  | 4  | 4  | 19  | 28.462 | 197040000  | 150540000  | 193960000  | 201440000  | 252330000  | 178720000  |
| sp Q9UMS | PRPF19  | sp Q9UMS | 1 | 16 | 16 | 16 | 55  | 55.18  | 7450700000 | 5695500000 | 7707000000 | 6876000000 | 6588200000 | 5626700000 |
| sp Q9UMX | UBQLN1  | sp Q9UMX | 1 | 12 | 12 | 8  | 41  | 62.518 | 2326900000 | 2420700000 | 2295800000 | 2072000000 | 2358500000 | 2028500000 |
| sp Q9UMX | NENF    | sp Q9UMX | 1 | 4  | 4  | 4  | 41  | 18.856 | 371860000  | 386400000  | 399600000  | 304360000  | 461250000  | 323990000  |
| sp Q9UMY | NOL7    | sp Q9UMY | 1 | 1  | 1  | 1  | 3.9 | 29.426 | 0          | 0          | 0          | 0          | 0          | 319380000  |
| sp Q9UMY | SNX12   | sp Q9UMY | 1 | 8  | 7  | 7  | 58  | 19.73  | 1245900000 | 1373400000 | 1162100000 | 1022600000 | 1076800000 | 1346100000 |
| sp Q9UN3 | VPS4A   | sp Q9UN3 | 1 | 5  | 4  | 4  | 14  | 48.897 | 121400000  | 215450000  | 141130000  | 140730000  | 195680000  | 184640000  |
| sp Q9UN7 | SOX13   | sp Q9UN7 | 1 | 1  | 1  | 1  | 2.3 | 69.228 | 0          | 0          | 0          | 0          | 2606100000 | 0          |
| sp Q9UN8 | G3BP2   | sp Q9UN8 | 1 | 11 | 10 | 10 | 32  | 54.12  | 1557800000 | 1606900000 | 1860800000 | 1679800000 | 1842000000 | 1486200000 |
| sp Q9UNE | STUB1   | sp Q9UNE | 1 | 8  | 8  | 8  | 30  | 34.856 | 0          | 495810000  | 369830000  | 378840000  | 376200000  | 508400000  |
| sp Q9UNF | PACSIN2 | sp Q9UNF | 1 | 13 | 13 | 13 | 36  | 55.738 | 838170000  | 690030000  | 915340000  | 732520000  | 792540000  | 837390000  |
| sp Q9UNF | MAGED2  | sp Q9UNF | 3 | 17 | 17 | 17 | 45  | 64.953 | 969980000  | 1066000000 | 978850000  | 953250000  | 805120000  | 857640000  |
| sp Q9UNH | SNX6    | sp Q9UNH | 1 | 12 | 12 | 12 | 33  | 46.648 | 583150000  | 720050000  | 797540000  | 726910000  | 671220000  | 667130000  |
| sp Q9UNI | DUSP12  | sp Q9UNI | 1 | 3  | 3  | 3  | 17  | 37.687 | 85700000   | 122220000  | 117620000  | 225050000  | 111850000  | 108130000  |
| sp Q9UNK | STX8    | sp Q9UNK | 1 | 1  | 1  | 1  | 7.6 | 26.906 | 0          | 0          | 0          | 0          | 0          | 15181000   |
| sp Q9UNL | SSR3    | sp Q9UNL | 1 | 1  | 1  | 1  | 7.6 | 21.08  | 446920000  | 391310000  | 366190000  | 575670000  | 117520000  | 376630000  |
| sp Q9UNN | PSMD13  | sp Q9UNN | 1 | 17 | 17 | 17 | 50  | 42.945 | 3666400000 | 3786700000 | 3776400000 | 3904200000 | 3696300000 | 3447800000 |
| sp Q9UNN | FAF1    | sp Q9UNN | 1 | 5  | 5  | 5  | 12  | 73.953 | 0          | 255960000  | 261770000  | 0          | 284820000  | 226110000  |
| sp Q9UNN | PROCR   | sp Q9UNN | 1 | 2  | 2  | 2  | 9.2 | 26.671 | 156480000  | 179700000  | 173850000  | 133760000  | 0          | 0          |
| sp Q9UNF | PPIE    | sp Q9UNF | 1 | 5  | 5  | 4  | 24  | 33.43  | 383650000  | 425020000  | 230940000  | 523310000  | 0          | 273000000  |
| sp Q9UNC | DIMT1   | sp Q9UNC | 1 | 9  | 9  | 9  | 40  | 35.236 | 441760000  | 499670000  | 443240000  | 438360000  | 337560000  | 241090000  |
| sp Q9UNS | COPS3   | sp Q9UNS | 1 | 12 | 12 | 12 | 42  | 47.873 | 1803800000 | 2017100000 | 1605500000 | 1531000000 | 1770700000 | 1746200000 |
| sp Q9UNX | RPL26L1 | sp Q9UNX | 1 | 9  | 2  | 2  | 45  | 17.256 | 517310000  | 478560000  | 488710000  | 535860000  | 430340000  | 629910000  |
| sp Q9UNX | WDR3    | sp Q9UNX | 1 | 17 | 17 | 17 | 25  | 106.1  | 506800000  | 397560000  | 549320000  | 544340000  | 469120000  | 498290000  |
| sp Q9UNZ | NSFL1C  | sp Q9UNZ | 1 | 9  | 9  | 9  | 34  | 40.572 | 679300000  | 749050000  | 809530000  | 886220000  | 786350000  | 556290000  |
| sp Q9UPN | MACF1   | sp Q9UPN | 1 | 19 | 18 | 18 | 4   | 838.3  | 403870000  | 490140000  | 375430000  | 438780000  | 464820000  | 511820000  |
| sp Q9UPN | CEP131  | sp Q9UPN | 1 | 1  | 1  | 1  | 1.3 | 122.15 | 0          | 0          | 0          | 24318000   | 0          | 0          |
| sp Q9UPN | PPP6R1  | sp Q9UPN | 1 | 5  | 5  | 5  | 11  | 96.723 | 0          | 0          | 0          | 0          | 113270000  | 151300000  |
| sp Q9UPN | TRIM33  | sp Q9UPN | 1 | 4  | 4  | 4  | 6.7 | 122.53 | 0          | 0          | 0          | 270820000  | 235940000  | 171390000  |

|                  |          |   |    |    |    |     |        |            |            |            |             |             |            |
|------------------|----------|---|----|----|----|-----|--------|------------|------------|------------|-------------|-------------|------------|
| sp Q9UPC LIMCH1  | sp Q9UPC | 1 | 16 | 16 | 16 | 22  | 121.87 | 715700000  | 668360000  | 812700000  | 664740000   | 645010000   | 322100000  |
| sp Q9UPC TNRC6B  | sp Q9UPC | 1 | 2  | 2  | 2  | 2.7 | 194    | 0          | 0          | 63070000   | 0           | 0           | 0          |
| sp Q9UPT EXOC7   | sp Q9UPT | 1 | 4  | 4  | 4  | 6.9 | 83.381 | 166490000  | 0          | 0          | 199640000   | 0           | 0          |
| sp Q9UPT ZC3H4   | sp Q9UPT | 1 | 5  | 5  | 5  | 7.8 | 140.26 | 0          | 84655000   | 109800000  | 92074000    | 111730000   | 70287000   |
| sp Q9UPL USP24   | sp Q9UPL | 1 | 7  | 7  | 7  | 3.9 | 294.36 | 111610000  | 80984000   | 0          | 0           | 115100000   | 165400000  |
| sp Q9UPY SLC7A11 | sp Q9UPY | 1 | 3  | 3  | 3  | 6   | 55.422 | 396580000  | 438410000  | 370290000  | 578740000   | 483800000   | 499600000  |
| sp Q9UQ1 SHOC2   | sp Q9UQ1 | 1 | 4  | 4  | 4  | 16  | 64.887 | 99732000   | 0          | 0          | 0           | 0           | 0          |
| sp Q9UQ3 SRRM2   | sp Q9UQ3 | 1 | 33 | 33 | 33 | 18  | 299.61 | 3361800000 | 3776100000 | 2551700000 | 2958300000  | 2741600000  | 3040200000 |
| sp Q9UQ8 PA2G4   | sp Q9UQ8 | 1 | 22 | 22 | 22 | 65  | 43.786 | 1.4579E+10 | 1.3819E+10 | 1.3018E+10 | 13187000000 | 12515000000 | 1.3804E+10 |
| sp Q9UQ9 SPG7    | sp Q9UQ9 | 1 | 2  | 2  | 2  | 4.2 | 88.234 | 1101800000 | 0          | 1054800000 | 0           | 988510000   | 1194800000 |
| sp Q9UQE BAIAP2  | sp Q9UQE | 1 | 3  | 3  | 3  | 7.1 | 60.867 | 66003000   | 105950000  | 91912000   | 98373000    | 99530000    | 0          |
| sp Q9UQE SMC3    | sp Q9UQE | 1 | 34 | 34 | 34 | 36  | 141.54 | 3108900000 | 3204700000 | 2747600000 | 2654500000  | 2854600000  | 2890800000 |
| sp Q9Y22 NIP7    | sp Q9Y22 | 1 | 3  | 3  | 3  | 24  | 20.462 | 386650000  | 265870000  | 233400000  | 333040000   | 241750000   | 429150000  |
| sp Q9Y22 GNE     | sp Q9Y22 | 1 | 5  | 5  | 5  | 10  | 79.274 | 0          | 0          | 111310000  | 151500000   | 0           | 0          |
| sp Q9Y22 RTRAF   | sp Q9Y22 | 1 | 13 | 13 | 13 | 55  | 28.068 | 1702200000 | 1869900000 | 1586600000 | 1685200000  | 1272800000  | 1434300000 |
| sp Q9Y23 RUVBL2  | sp Q9Y23 | 1 | 25 | 25 | 25 | 55  | 51.156 | 5204100000 | 5788500000 | 5351800000 | 6353800000  | 6199700000  | 6726100000 |
| sp Q9Y23 PIN4    | sp Q9Y23 | 1 | 2  | 2  | 2  | 32  | 13.81  | 413800000  | 349290000  | 345400000  | 288740000   | 349650000   | 279810000  |
| sp Q9Y24 HIGD1A  | sp Q9Y24 | 1 | 1  | 1  | 1  | 19  | 10.143 | 0          | 0          | 0          | 0           | 0           | 132330000  |
| sp Q9Y24 GINS2   | sp Q9Y24 | 1 | 2  | 2  | 2  | 14  | 21.427 | 0          | 0          | 0          | 33867000    | 0           | 0          |
| sp Q9Y26 EIF3L   | sp Q9Y26 | 1 | 18 | 18 | 18 | 40  | 66.726 | 3672300000 | 3311400000 | 3841000000 | 2938300000  | 3180200000  | 3104400000 |
| sp Q9Y26 PLAA    | sp Q9Y26 | 1 | 25 | 25 | 25 | 39  | 87.156 | 2232100000 | 2441200000 | 2820800000 | 2858200000  | 2410700000  | 2734600000 |
| sp Q9Y26 RUVBL1  | sp Q9Y26 | 1 | 17 | 17 | 17 | 51  | 50.227 | 4770300000 | 6018300000 | 4899500000 | 5268100000  | 6048300000  | 5655400000 |
| sp Q9Y26 NUDC    | sp Q9Y26 | 1 | 16 | 16 | 16 | 54  | 38.242 | 6512800000 | 6860800000 | 6139700000 | 6017000000  | 7945000000  | 6957700000 |
| sp Q9Y27 BCS1L   | sp Q9Y27 | 1 | 5  | 5  | 5  | 16  | 47.534 | 0          | 297620000  | 222480000  | 312140000   | 230820000   | 268870000  |
| sp Q9Y27 VDAC3   | sp Q9Y27 | 1 | 8  | 8  | 8  | 39  | 30.658 | 2614000000 | 2750100000 | 2120600000 | 2814900000  | 2837800000  | 2386000000 |
| sp Q9Y28 CFL2    | sp Q9Y28 | 1 | 8  | 5  | 5  | 60  | 18.736 | 1202600000 | 1110400000 | 1476700000 | 1390500000  | 1222900000  | 819850000  |
| sp Q9Y28 ERGIC3  | sp Q9Y28 | 1 | 5  | 5  | 5  | 13  | 43.222 | 454080000  | 407900000  | 435460000  | 510030000   | 430420000   | 330790000  |
| sp Q9Y28 FARSA   | sp Q9Y28 | 1 | 12 | 12 | 12 | 36  | 57.563 | 2089000000 | 1894700000 | 1693000000 | 1853300000  | 1564200000  | 1803900000 |
| sp Q9Y29 ASF1A   | sp Q9Y29 | 1 | 3  | 2  | 2  | 27  | 22.968 | 115980000  | 103100000  | 147370000  | 150270000   | 0           | 0          |
| sp Q9Y29 DRG1    | sp Q9Y29 | 1 | 11 | 11 | 11 | 40  | 40.542 | 1480700000 | 1748700000 | 1496000000 | 1247300000  | 1255700000  | 1451100000 |
| sp Q9Y2A NCKAP1  | sp Q9Y2A | 1 | 14 | 14 | 14 | 19  | 128.79 | 959950000  | 963620000  | 800460000  | 992360000   | 958970000   | 758050000  |
| sp Q9Y2B CNPY2   | sp Q9Y2B | 1 | 9  | 9  | 9  | 58  | 20.652 | 1672300000 | 1752100000 | 1625700000 | 1790000000  | 1807000000  | 2124200000 |
| sp Q9Y2D AKAP2   | sp Q9Y2D | 1 | 7  | 7  | 7  | 14  | 94.659 | 0          | 144550000  | 227160000  | 156920000   | 193730000   | 210020000  |
| sp Q9Y2G DNAJC16 | sp Q9Y2G | 1 | 1  | 1  | 1  | 3.3 | 90.59  | 0          | 0          | 0          | 0           | 6224600     | 0          |
| sp Q9Y2H FNDC3A  | sp Q9Y2H | 1 | 5  | 5  | 5  | 7.9 | 131.85 | 0          | 156470000  | 166450000  | 131280000   | 131620000   | 137480000  |
| sp Q9Y2K KDM2A   | sp Q9Y2K | 1 | 6  | 6  | 6  | 7.2 | 132.79 | 0          | 0          | 386320000  | 308980000   | 270410000   | 228550000  |
| sp Q9Y2L DIS3    | sp Q9Y2L | 1 | 18 | 18 | 18 | 27  | 109    | 4169300000 | 4131700000 | 4971100000 | 4617100000  | 4994900000  | 4098900000 |
| sp Q9Y2L TRAPPC8 | sp Q9Y2L | 1 | 1  | 1  | 1  | 1.2 | 161    | 0          | 0          | 0          | 0           | 0           | 22228000   |
| sp Q9Y2P RCL1    | sp Q9Y2P | 1 | 5  | 5  | 5  | 19  | 40.842 | 177540000  | 206230000  | 155420000  | 163420000   | 145960000   | 144490000  |

|                  |          |   |    |    |    |     |        |            |            |            |            |            |            |
|------------------|----------|---|----|----|----|-----|--------|------------|------------|------------|------------|------------|------------|
| sp Q9Y2C GSTK1   | sp Q9Y2C | 1 | 4  | 4  | 4  | 24  | 25.497 | 432130000  | 327460000  | 408140000  | 524260000  | 391230000  | 325010000  |
| sp Q9Y2C LAMTOR2 | sp Q9Y2C | 1 | 3  | 3  | 3  | 30  | 13.507 | 281110000  | 258190000  | 179110000  | 278340000  | 296040000  | 213300000  |
| sp Q9Y2C MRPS28  | sp Q9Y2C | 1 | 2  | 2  | 2  | 11  | 20.843 | 0          | 195520000  | 231150000  | 190890000  | 0          | 167860000  |
| sp Q9Y2R COA3    | sp Q9Y2R | 1 | 2  | 2  | 2  | 18  | 11.731 | 0          | 431960000  | 0          | 0          | 587910000  | 579270000  |
| sp Q9Y2R DDX52   | sp Q9Y2R | 1 | 7  | 7  | 7  | 19  | 67.497 | 300560000  | 312910000  | 268980000  | 195590000  | 275400000  | 302300000  |
| sp Q9Y2R MRPS17  | sp Q9Y2R | 1 | 5  | 5  | 5  | 59  | 14.502 | 615550000  | 583970000  | 486910000  | 660370000  | 490870000  | 496570000  |
| sp Q9Y2R MRPS7   | sp Q9Y2R | 1 | 10 | 10 | 10 | 49  | 28.134 | 517650000  | 700110000  | 418660000  | 498260000  | 531060000  | 544690000  |
| sp Q9Y2S TMA7    | sp Q9Y2S | 1 | 2  | 2  | 2  | 30  | 7.0662 | 778600000  | 1002100000 | 595880000  | 642560000  | 820180000  | 667400000  |
| sp Q9Y2S POLDIP2 | sp Q9Y2S | 1 | 5  | 5  | 5  | 22  | 42.033 | 342040000  | 296650000  | 192290000  | 266880000  | 566340000  | 0          |
| sp Q9Y2T AP3M1   | sp Q9Y2T | 2 | 4  | 4  | 4  | 13  | 46.939 | 205060000  | 245490000  | 261610000  | 210120000  | 299870000  | 309750000  |
| sp Q9Y2T GDA     | sp Q9Y2T | 1 | 4  | 4  | 4  | 9.7 | 51.002 | 0          | 85146000   | 0          | 0          | 0          | 0          |
| sp Q9Y2U LEMD3   | sp Q9Y2U | 1 | 5  | 5  | 5  | 8.7 | 99.996 | 187500000  | 251790000  | 185940000  | 266260000  | 277370000  | 190120000  |
| sp Q9Y2V CARHSP1 | sp Q9Y2V | 1 | 6  | 6  | 6  | 71  | 15.892 | 1377800000 | 674420000  | 622220000  | 708050000  | 664500000  | 779990000  |
| sp Q9Y2V THRAP3  | sp Q9Y2V | 1 | 21 | 21 | 20 | 25  | 108.66 | 3085300000 | 3299700000 | 3186400000 | 2990400000 | 3537000000 | 3185600000 |
| sp Q9Y2V WBP11   | sp Q9Y2V | 1 | 15 | 15 | 15 | 31  | 69.997 | 1863200000 | 1732400000 | 1637100000 | 1485700000 | 1535600000 | 1669300000 |
| sp Q9Y2X NOP58   | sp Q9Y2X | 1 | 18 | 18 | 18 | 46  | 59.578 | 3264100000 | 3246100000 | 3329000000 | 4110400000 | 3928200000 | 3222000000 |
| sp Q9Y2X GIT1    | sp Q9Y2X | 1 | 3  | 2  | 2  | 6   | 84.34  | 731840000  | 728760000  | 530960000  | 0          | 550920000  | 659950000  |
| sp Q9Y2X ZNF281  | sp Q9Y2X | 1 | 4  | 4  | 4  | 8.4 | 96.914 | 0          | 0          | 738410000  | 471020000  | 488890000  | 0          |
| sp Q9Y2Z SUGT1   | sp Q9Y2Z | 1 | 15 | 15 | 15 | 49  | 41.024 | 2259700000 | 2378700000 | 2494900000 | 2415200000 | 2444200000 | 2468800000 |
| sp Q9Y2Z YARS2   | sp Q9Y2Z | 1 | 7  | 7  | 7  | 28  | 53.198 | 709040000  | 719510000  | 612170000  | 780700000  | 768710000  | 769630000  |
| sp Q9Y30 AMDHD2  | sp Q9Y30 | 1 | 1  | 1  | 1  | 2.9 | 43.747 | 0          | 0          | 0          | 0          | 21359000   | 0          |
| sp Q9Y30 ACOT9   | sp Q9Y30 | 1 | 12 | 12 | 12 | 33  | 49.901 | 1282300000 | 1240000000 | 1443300000 | 1474800000 | 1485100000 | 1374100000 |
| sp Q9Y31 AAR2    | sp Q9Y31 | 1 | 6  | 6  | 6  | 27  | 43.472 | 207720000  | 173220000  | 188960000  | 233540000  | 233030000  | 185040000  |
| sp Q9Y31 NOSIP   | sp Q9Y31 | 1 | 6  | 6  | 6  | 28  | 33.172 | 527990000  | 622420000  | 510110000  | 585540000  | 567010000  | 613170000  |
| sp Q9Y31 DERA    | sp Q9Y31 | 1 | 2  | 2  | 2  | 7.5 | 35.23  | 69978000   | 62691000   | 58464000   | 0          | 51746000   | 34100000   |
| sp Q9Y31 MEMO1   | sp Q9Y31 | 1 | 7  | 7  | 7  | 37  | 33.733 | 305260000  | 291030000  | 244300000  | 313240000  | 210290000  | 199180000  |
| sp Q9Y32 TMX2    | sp Q9Y32 | 1 | 3  | 3  | 3  | 14  | 34.037 | 0          | 0          | 0          | 173830000  | 0          | 0          |
| sp Q9Y33 LSM2    | sp Q9Y33 | 1 | 2  | 2  | 2  | 40  | 10.834 | 547610000  | 740800000  | 408680000  | 499350000  | 219640000  | 758560000  |
| sp Q9Y37 SH3GLB1 | sp Q9Y37 | 1 | 5  | 5  | 5  | 23  | 40.796 | 130810000  | 141370000  | 138500000  | 139730000  | 162750000  | 119180000  |
| sp Q9Y37 NDUFAB1 | sp Q9Y37 | 1 | 1  | 1  | 1  | 7   | 37.763 | 0          | 0          | 0          | 0          | 32720000   | 0          |
| sp Q9Y37 CAB39   | sp Q9Y37 | 2 | 6  | 6  | 6  | 15  | 39.869 | 321750000  | 290840000  | 264250000  | 315360000  | 188260000  | 170530000  |
| sp Q9Y38 LUC7L2  | sp Q9Y38 | 1 | 16 | 16 | 11 | 38  | 46.513 | 4030400000 | 4613000000 | 4104200000 | 3489400000 | 4294000000 | 3451000000 |
| sp Q9Y39 DHRS7   | sp Q9Y39 | 1 | 2  | 2  | 2  | 16  | 38.298 | 122960000  | 90386000   | 0          | 0          | 136080000  | 130540000  |
| sp Q9Y39 MRPS2   | sp Q9Y39 | 1 | 6  | 6  | 6  | 31  | 33.249 | 264610000  | 271170000  | 247610000  | 214760000  | 209210000  | 205540000  |
| sp Q9Y3A UTP11   | sp Q9Y3A | 1 | 3  | 3  | 3  | 12  | 30.446 | 48122000   | 32343000   | 0          | 0          | 108230000  | 62099000   |
| sp Q9Y3A MOB4    | sp Q9Y3A | 1 | 6  | 6  | 6  | 54  | 26.032 | 286280000  | 298920000  | 255340000  | 268150000  | 374840000  | 389620000  |
| sp Q9Y3A RRP7A   | sp Q9Y3A | 2 | 7  | 7  | 7  | 39  | 32.334 | 299650000  | 0          | 456670000  | 346050000  | 429430000  | 351870000  |
| sp Q9Y3A SBDS    | sp Q9Y3A | 1 | 17 | 17 | 17 | 65  | 28.763 | 3899500000 | 3892600000 | 3764800000 | 3260500000 | 3636400000 | 3646900000 |
| sp Q9Y3A TMED5   | sp Q9Y3A | 1 | 3  | 3  | 3  | 13  | 26.005 | 273010000  | 253740000  | 0          | 284150000  | 316110000  | 263950000  |

|                 |          |   |    |     |    |     |        |            |            |            |             |             |            |
|-----------------|----------|---|----|-----|----|-----|--------|------------|------------|------------|-------------|-------------|------------|
| sp Q9Y3B EXOSC1 | sp Q9Y3B | 1 | 2  | 2   | 2  | 14  | 21.452 | 0          | 0          | 0          | 0           | 0           | 166070000  |
| sp Q9Y3B TMED7  | sp Q9Y3B | 1 | 4  | 4   | 4  | 24  | 25.171 | 842440000  | 1118400000 | 689310000  | 1229700000  | 1262900000  | 1191000000 |
| sp Q9Y3B SF3B6  | sp Q9Y3B | 1 | 3  | 3   | 3  | 26  | 14.585 | 808130000  | 616380000  | 633380000  | 510130000   | 542410000   | 860440000  |
| sp Q9Y3B MRPL11 | sp Q9Y3B | 1 | 7  | 7   | 7  | 38  | 20.683 | 506360000  | 390100000  | 457000000  | 399120000   | 446790000   | 460140000  |
| sp Q9Y3B REXO2  | sp Q9Y3B | 1 | 7  | 7   | 7  | 35  | 26.832 | 524380000  | 397570000  | 611940000  | 491660000   | 427360000   | 467100000  |
| sp Q9Y3B RRP15  | sp Q9Y3B | 1 | 6  | 6   | 6  | 21  | 31.484 | 283730000  | 198150000  | 257450000  | 315430000   | 340410000   | 273640000  |
| sp Q9Y3C NOP16  | sp Q9Y3C | 1 | 5  | 5   | 5  | 28  | 21.188 | 385240000  | 408170000  | 281470000  | 405470000   | 385540000   | 454970000  |
| sp Q9Y3C TPRKB  | sp Q9Y3C | 1 | 1  | 1   | 1  | 10  | 19.661 | 0          | 0          | 0          | 0           | 0           | 7965000    |
| sp Q9Y3C PPIL1  | sp Q9Y3C | 1 | 4  | 4   | 4  | 30  | 18.237 | 1069100000 | 646120000  | 747290000  | 798540000   | 656800000   | 613010000  |
| sp Q9Y3C MED31  | sp Q9Y3C | 1 | 1  | 1   | 1  | 13  | 15.805 | 0          | 0          | 0          | 0           | 0           | 30909000   |
| sp Q9Y3C UFC1   | sp Q9Y3C | 1 | 4  | 4   | 4  | 22  | 19.458 | 279790000  | 469800000  | 320260000  | 299620000   | 337690000   | 336060000  |
| sp Q9Y3D FAM96B | sp Q9Y3D | 1 | 3  | 3   | 3  | 30  | 17.663 | 132410000  | 212220000  | 170660000  | 0           | 0           | 190960000  |
| sp Q9Y3D MRPS16 | sp Q9Y3D | 1 | 1  | 1   | 1  | 13  | 15.345 | 0          | 0          | 0          | 0           | 0           | 23646000   |
| sp Q9Y3D FIS1   | sp Q9Y3D | 1 | 4  | 4   | 4  | 34  | 16.937 | 519880000  | 585470000  | 765170000  | 550680000   | 509880000   | 296080000  |
| sp Q9Y3D PAM16  | sp Q9Y3D | 1 | 2  | 2   | 2  | 25  | 13.825 | 198220000  | 285230000  | 254760000  | 381550000   | 318310000   | 287360000  |
| sp Q9Y3D AK6    | sp Q9Y3D | 1 | 5  | 5   | 5  | 41  | 20.061 | 233830000  | 237900000  | 267150000  | 244890000   | 201130000   | 220130000  |
| sp Q9Y3D MRPS23 | sp Q9Y3D | 1 | 6  | 6   | 6  | 36  | 21.77  | 428290000  | 245030000  | 215530000  | 291370000   | 370470000   | 520540000  |
| sp Q9Y3E GOLT1B | sp Q9Y3E | 1 | 1  | 1   | 1  | 6.5 | 15.425 | 0          | 0          | 0          | 0           | 0           | 58315000   |
| sp Q9Y3E HDGFL3 | sp Q9Y3E | 1 | 2  | 1   | 1  | 12  | 22.619 | 0          | 0          | 0          | 0           | 45184000    | 0          |
| sp Q9Y3E PTRH2  | sp Q9Y3E | 1 | 5  | 5   | 5  | 44  | 19.193 | 1012400000 | 929530000  | 929600000  | 953980000   | 1137300000  | 857680000  |
| sp Q9Y3F STRAP  | sp Q9Y3F | 1 | 19 | 19  | 19 | 71  | 38.438 | 6084700000 | 6325500000 | 5449100000 | 5851000000  | 7289700000  | 5657100000 |
| sp Q9Y3I RTCB   | sp Q9Y3I | 1 | 20 | 20  | 20 | 51  | 55.21  | 5316900000 | 4781600000 | 5557100000 | 5439200000  | 5863100000  | 5561200000 |
| sp Q9Y3I FBXO7  | sp Q9Y3I | 1 | 4  | 4   | 4  | 11  | 58.502 | 118790000  | 104660000  | 106820000  | 101000000   | 133070000   | 97043000   |
| sp Q9Y3L RAP2C  | sp Q9Y3L | 2 | 5  | 5   | 3  | 40  | 20.745 | 149160000  | 432610000  | 200950000  | 313890000   | 219340000   | 238540000  |
| sp Q9Y3P RABGAP | sp Q9Y3P | 1 | 7  | 7   | 6  | 9   | 121.74 | 0          | 90632000   | 145820000  | 110770000   | 130090000   | 198450000  |
| sp Q9Y3T NOC2L  | sp Q9Y3T | 1 | 8  | 8   | 8  | 11  | 84.918 | 434390000  | 347360000  | 376850000  | 552240000   | 406790000   | 367180000  |
| sp Q9Y3U RPL36  | sp Q9Y3U | 1 | 5  | 5   | 5  | 31  | 12.254 | 6819900000 | 4839800000 | 6216500000 | 6570500000  | 7224700000  | 6674000000 |
| sp Q9Y3Y CHTOP  | sp Q9Y3Y | 1 | 5  | 5   | 5  | 24  | 26.396 | 813280000  | 883770000  | 713350000  | 1106700000  | 854910000   | 863250000  |
| sp Q9Y3Z SAMHD1 | sp Q9Y3Z | 1 | 8  | 8   | 8  | 16  | 72.2   | 300570000  | 392970000  | 325150000  | 351610000   | 267210000   | 235100000  |
| sp Q9Y44 KNSTRN | sp Q9Y44 | 1 | 2  | 2   | 2  | 11  | 35.438 | 127280000  | 122310000  | 138570000  | 206610000   | 136880000   | 119200000  |
| sp Q9Y45 HBS1L  | sp Q9Y45 | 1 | 8  | 8   | 8  | 17  | 75.472 | 414430000  | 603900000  | 295470000  | 369940000   | 572540000   | 430450000  |
| sp Q9Y49 TLN1   | sp Q9Y49 | 1 | ## | 112 | 99 | 66  | 269.76 | 3.0492E+10 | 2.8656E+10 | 2.7683E+10 | 26700000000 | 29961000000 | 2.8885E+10 |
| sp Q9Y4A TRRAP  | sp Q9Y4A | 1 | 1  | 1   | 1  | 0.3 | 437.6  | 0          | 0          | 0          | 0           | 58458000    | 0          |
| sp Q9Y4C TCAF1  | sp Q9Y4C | 1 | 6  | 6   | 6  | 8.7 | 102.12 | 180650000  | 0          | 190220000  | 190070000   | 0           | 0          |
| sp Q9Y4C RBM19  | sp Q9Y4C | 1 | 2  | 2   | 2  | 3   | 107.33 | 0          | 0          | 0          | 0           | 101670000   | 0          |
| sp Q9Y4E USP15  | sp Q9Y4E | 1 | 7  | 7   | 7  | 12  | 112.42 | 374750000  | 296270000  | 401430000  | 376100000   | 447730000   | 310970000  |
| sp Q9Y4G TLN2   | sp Q9Y4G | 1 | 15 | 2   | 2  | 5.8 | 271.61 | 107340000  | 112430000  | 96645000   | 0           | 0           | 0          |
| sp Q9Y4H IRS2   | sp Q9Y4H | 1 | 2  | 2   | 2  | 3.3 | 137.33 | 0          | 0          | 0          | 0           | 39178000    | 0          |
| sp Q9Y4I MYO5A  | sp Q9Y4I | 2 | 2  | 2   | 2  | 1.4 | 215.4  | 0          | 0          | 0          | 29563000    | 0           | 0          |

|                  |          |   |    |    |    |     |        |            |            |            |            |            |            |
|------------------|----------|---|----|----|----|-----|--------|------------|------------|------------|------------|------------|------------|
| sp Q9Y4K CRYBG1  | sp Q9Y4K | 1 | 1  | 1  | 1  | 0.7 | 188.67 | 0          | 0          | 0          | 0          | 0          | 730730000  |
| sp Q9Y4L HYOU1   | sp Q9Y4L | 2 | 29 | 29 | 29 | 36  | 111.33 | 3348200000 | 3321300000 | 3516300000 | 3726000000 | 3991100000 | 3779400000 |
| sp Q9Y4P ATG4B   | sp Q9Y4P | 1 | 5  | 5  | 5  | 21  | 44.294 | 124700000  | 147300000  | 159410000  | 133200000  | 172690000  | 168140000  |
| sp Q9Y4P TBL2    | sp Q9Y4P | 1 | 10 | 10 | 10 | 30  | 49.797 | 620100000  | 523880000  | 508700000  | 758580000  | 705300000  | 532720000  |
| sp Q9Y4R TELO2   | sp Q9Y4R | 1 | 5  | 5  | 5  | 7   | 91.746 | 60693000   | 71056000   | 97861000   | 58158000   | 59794000   | 59274000   |
| sp Q9Y4V LAS1L   | sp Q9Y4V | 1 | 11 | 11 | 11 | 26  | 83.064 | 487330000  | 476570000  | 453610000  | 544630000  | 497280000  | 506020000  |
| sp Q9Y4V AFG3L2  | sp Q9Y4V | 1 | 15 | 15 | 15 | 22  | 88.583 | 709900000  | 920930000  | 698060000  | 730420000  | 936710000  | 685940000  |
| sp Q9Y4X KLF12   | sp Q9Y4X | 1 | 1  | 1  | 1  | 4.7 | 44.239 | 0          | 0          | 0          | 57254000   | 0          | 0          |
| sp Q9Y4X ARIH1   | sp Q9Y4X | 1 | 9  | 9  | 9  | 28  | 64.117 | 408750000  | 560020000  | 445440000  | 442220000  | 337450000  | 260170000  |
| sp Q9Y4Y LSM5    | sp Q9Y4Y | 1 | 2  | 2  | 2  | 46  | 9.9374 | 533450000  | 557960000  | 562810000  | 481380000  | 925740000  | 468110000  |
| sp Q9Y4Z LSM4    | sp Q9Y4Z | 1 | 3  | 3  | 3  | 17  | 15.35  | 243140000  | 0          | 0          | 322790000  | 254050000  | 255040000  |
| sp Q9Y50 RNF114  | sp Q9Y50 | 1 | 7  | 7  | 7  | 40  | 25.694 | 455720000  | 290340000  | 331800000  | 327940000  | 435140000  | 420170000  |
| sp Q9Y51 SAMM50  | sp Q9Y51 | 1 | 14 | 14 | 14 | 41  | 51.976 | 932440000  | 900310000  | 824670000  | 861520000  | 946920000  | 965860000  |
| sp Q9Y52 PRRC2C  | sp Q9Y52 | 1 | 22 | 22 | 21 | 12  | 316.91 | 1173200000 | 1168700000 | 1185200000 | 1345800000 | 1079700000 | 1316000000 |
| sp Q9Y54 HSPB11  | sp Q9Y54 | 1 | 2  | 2  | 2  | 25  | 16.297 | 616590000  | 481060000  | 650820000  | 687800000  | 479600000  | 362800000  |
| sp Q9Y57 PPME1   | sp Q9Y57 | 1 | 15 | 15 | 15 | 48  | 42.315 | 1062600000 | 1005400000 | 842140000  | 847140000  | 992220000  | 758590000  |
| sp Q9Y5A YTHDF2  | sp Q9Y5A | 1 | 12 | 12 | 7  | 24  | 62.333 | 1578800000 | 1526300000 | 1406000000 | 1324800000 | 1512100000 | 1213900000 |
| sp Q9Y5B CTDP1   | sp Q9Y5B | 1 | 3  | 3  | 3  | 4.4 | 104.4  | 22969000   | 0          | 488560000  | 0          | 0          | 0          |
| sp Q9Y5B PAXBP1  | sp Q9Y5B | 1 | 1  | 1  | 1  | 1.6 | 104.8  | 0          | 0          | 0          | 0          | 0          | 26889000   |
| sp Q9Y5B NME7    | sp Q9Y5B | 1 | 1  | 1  | 1  | 2.9 | 42.491 | 0          | 0          | 0          | 0          | 0          | 46757000   |
| sp Q9Y5B SUPT16H | sp Q9Y5B | 1 | 30 | 30 | 30 | 36  | 119.91 | 5662400000 | 5219500000 | 4890700000 | 4944700000 | 4969900000 | 5598100000 |
| sp Q9Y5J UTP18   | sp Q9Y5J | 1 | 8  | 8  | 8  | 21  | 62.003 | 483210000  | 395580000  | 414740000  | 332900000  | 359460000  | 447380000  |
| sp Q9Y5J TIMM9   | sp Q9Y5J | 1 | 2  | 2  | 2  | 35  | 10.378 | 373410000  | 494330000  | 380710000  | 507400000  | 336390000  | 448890000  |
| sp Q9Y5J TIMM8B  | sp Q9Y5J | 1 | 1  | 1  | 1  | 13  | 9.3435 | 0          | 0          | 0          | 0          | 0          | 66334000   |
| sp Q9Y5K UCHL5   | sp Q9Y5K | 1 | 11 | 11 | 11 | 47  | 37.606 | 1150700000 | 1067100000 | 1130700000 | 1013500000 | 966740000  | 1201400000 |
| sp Q9Y5K CD2AP   | sp Q9Y5K | 1 | 10 | 10 | 10 | 23  | 71.45  | 778980000  | 773070000  | 603840000  | 548850000  | 612140000  | 660530000  |
| sp Q9Y5K ATP6V1D | sp Q9Y5K | 1 | 5  | 5  | 5  | 32  | 28.262 | 254240000  | 253250000  | 218010000  | 211260000  | 241650000  | 225360000  |
| sp Q9Y5L TNPO3   | sp Q9Y5L | 1 | 10 | 10 | 10 | 15  | 104.2  | 647510000  | 725620000  | 814030000  | 541140000  | 722530000  | 592280000  |
| sp Q9Y5L TIMM13  | sp Q9Y5L | 1 | 4  | 4  | 4  | 58  | 10.5   | 703950000  | 672390000  | 810930000  | 683460000  | 785910000  | 475500000  |
| sp Q9Y5M SRPRB   | sp Q9Y5M | 1 | 10 | 10 | 10 | 43  | 29.702 | 1421900000 | 1587900000 | 1362000000 | 2053700000 | 2525200000 | 2320300000 |
| sp Q9Y5P COL4A3B | sp Q9Y5P | 1 | 3  | 3  | 3  | 6.6 | 70.834 | 0          | 105500000  | 92210000   | 80455000   | 67913000   | 0          |
| sp Q9Y5P GMPPB   | sp Q9Y5P | 1 | 4  | 4  | 4  | 17  | 39.834 | 376670000  | 358410000  | 429090000  | 399880000  | 306530000  | 294900000  |
| sp Q9Y5Q GTF3C5  | sp Q9Y5Q | 1 | 6  | 6  | 6  | 16  | 59.57  | 307070000  | 188370000  | 228030000  | 227410000  | 274830000  | 274050000  |
| sp Q9Y5Q GTF3C3  | sp Q9Y5Q | 1 | 8  | 8  | 8  | 16  | 101.27 | 157560000  | 144260000  | 176390000  | 113750000  | 165870000  | 165090000  |
| sp Q9Y5R TRAPPC1 | sp Q9Y5R | 1 | 1  | 1  | 1  | 11  | 16.831 | 0          | 0          | 0          | 0          | 0          | 68380000   |
| sp Q9Y5S CDC42BP | sp Q9Y5S | 1 | 3  | 2  | 2  | 1.6 | 194.31 | 0          | 0          | 0          | 0          | 52868000   | 0          |
| sp Q9Y5S RBM8A   | sp Q9Y5S | 1 | 6  | 6  | 6  | 47  | 19.889 | 1960700000 | 2107900000 | 1981400000 | 1614300000 | 2253900000 | 2148500000 |
| sp Q9Y5T USP16   | sp Q9Y5T | 1 | 3  | 3  | 3  | 5   | 93.569 | 0          | 285110000  | 234980000  | 0          | 0          | 0          |
| sp Q9Y5U TSSC4   | sp Q9Y5U | 1 | 2  | 2  | 2  | 7.3 | 34.325 | 83203000   | 0          | 0          | 0          | 82333000   | 72261000   |

|                  |          |   |    |    |    |     |        |            |            |            |            |            |            |
|------------------|----------|---|----|----|----|-----|--------|------------|------------|------------|------------|------------|------------|
| sp Q9Y5U IER3IP1 | sp Q9Y5U | 1 | 2  | 2  | 2  | 34  | 8.9687 | 422000000  | 469650000  | 657620000  | 514230000  | 730250000  | 523530000  |
| sp Q9Y5X SNX9    | sp Q9Y5X | 1 | 4  | 4  | 4  | 12  | 66.591 | 670310000  | 722740000  | 568240000  | 424740000  | 156880000  | 335030000  |
| sp Q9Y5X SNX8    | sp Q9Y5X | 1 | 1  | 1  | 1  | 2.8 | 52.569 | 0          | 0          | 0          | 0          | 0          | 26317000   |
| sp Q9Y5X SNX5    | sp Q9Y5X | 1 | 3  | 3  | 3  | 9.9 | 46.816 | 0          | 0          | 0          | 0          | 0          | 35059000   |
| sp Q9Y5Y NUBP2   | sp Q9Y5Y | 1 | 8  | 8  | 8  | 47  | 28.825 | 651120000  | 881370000  | 642780000  | 724840000  | 665270000  | 624240000  |
| sp Q9Y5Z HEBP2   | sp Q9Y5Z | 1 | 1  | 1  | 1  | 6.3 | 22.875 | 0          | 0          | 0          | 0          | 0          | 14391000   |
| sp Q9Y60 MRFAP1  | sp Q9Y60 | 2 | 2  | 2  | 2  | 28  | 14.649 | 240950000  | 0          | 191640000  | 166320000  | 212950000  | 194470000  |
| sp Q9Y60 PUS1    | sp Q9Y60 | 1 | 5  | 5  | 5  | 14  | 47.47  | 180990000  | 145090000  | 116060000  | 132520000  | 192860000  | 200550000  |
| sp Q9Y60 LRRFIP2 | sp Q9Y60 | 1 | 5  | 4  | 4  | 8.5 | 82.17  | 0          | 146270000  | 292020000  | 147150000  | 0          | 0          |
| sp Q9Y61 FHOD1   | sp Q9Y61 | 1 | 5  | 5  | 5  | 8.5 | 126.55 | 107830000  | 141310000  | 128480000  | 0          | 130870000  | 150730000  |
| sp Q9Y61 PSAT1   | sp Q9Y61 | 1 | 17 | 17 | 17 | 49  | 40.422 | 4285700000 | 4177300000 | 4619900000 | 4954200000 | 5170800000 | 4482900000 |
| sp Q9Y61 NCOR2   | sp Q9Y61 | 1 | 6  | 6  | 6  | 4   | 274.8  | 0          | 116410000  | 157230000  | 0          | 0          | 0          |
| sp Q9Y63 NPTN    | sp Q9Y63 | 1 | 6  | 6  | 6  | 18  | 44.387 | 902630000  | 525090000  | 1033900000 | 719970000  | 657510000  | 621390000  |
| sp Q9Y65 ADGRG1  | sp Q9Y65 | 1 | 3  | 3  | 3  | 5.6 | 77.737 | 0          | 0          | 0          | 172580000  | 201950000  | 0          |
| sp Q9Y65 SPIN1   | sp Q9Y65 | 2 | 3  | 3  | 3  | 17  | 29.6   | 0          | 0          | 0          | 183740000  | 0          | 134520000  |
| sp Q9Y67 ALG5    | sp Q9Y67 | 1 | 4  | 4  | 4  | 17  | 36.946 | 0          | 0          | 146460000  | 158600000  | 183800000  | 0          |
| sp Q9Y67 MRPS18E | sp Q9Y67 | 1 | 5  | 5  | 5  | 32  | 29.395 | 350440000  | 602070000  | 228280000  | 500800000  | 453110000  | 501750000  |
| sp Q9Y67 COPG1   | sp Q9Y67 | 1 | 29 | 29 | 25 | 46  | 97.717 | 4254100000 | 4708500000 | 3936800000 | 4550700000 | 4368300000 | 4163400000 |
| sp Q9Y67 AUP1    | sp Q9Y67 | 1 | 4  | 4  | 4  | 12  | 53.028 | 269710000  | 188590000  | 276930000  | 245450000  | 239980000  | 321000000  |
| sp Q9Y69 CLIC4   | sp Q9Y69 | 1 | 12 | 12 | 12 | 61  | 28.772 | 2558100000 | 2665700000 | 2650700000 | 2893600000 | 2551400000 | 3016700000 |
| sp Q9Y69 NFS1    | sp Q9Y69 | 1 | 6  | 6  | 6  | 21  | 50.195 | 462210000  | 289100000  | 356620000  | 367650000  | 452680000  | 371300000  |
| sp Q9Y6A CFAP20  | sp Q9Y6A | 1 | 4  | 4  | 4  | 25  | 22.774 | 146700000  | 337150000  | 0          | 252060000  | 0          | 118830000  |
| sp Q9Y6A TACC3   | sp Q9Y6A | 1 | 5  | 5  | 5  | 10  | 90.359 | 174790000  | 222270000  | 203680000  | 156350000  | 158000000  | 256950000  |
| sp Q9Y6A SPCS1   | sp Q9Y6A | 1 | 3  | 3  | 3  | 31  | 11.805 | 488270000  | 536480000  | 292660000  | 818410000  | 905070000  | 493300000  |
| sp Q9Y6B SAR1B   | sp Q9Y6B | 1 | 7  | 4  | 4  | 39  | 22.41  | 573160000  | 433370000  | 542810000  | 490040000  | 636320000  | 552610000  |
| sp Q9Y6C MTCH2   | sp Q9Y6C | 1 | 11 | 11 | 11 | 51  | 33.331 | 3173800000 | 3861500000 | 3221200000 | 3808000000 | 3218400000 | 3469800000 |
| sp Q9Y6D ARFGEF2 | sp Q9Y6D | 1 | 8  | 8  | 6  | 5.9 | 202.04 | 192390000  | 167170000  | 161190000  | 146960000  | 164700000  | 214380000  |
| sp Q9Y6D MAD1L1  | sp Q9Y6D | 1 | 8  | 8  | 8  | 19  | 83.066 | 257740000  | 184100000  | 215080000  | 301280000  | 231230000  | 216560000  |
| sp Q9Y6E STK24   | sp Q9Y6E | 1 | 7  | 2  | 2  | 15  | 49.307 | 165020000  | 131260000  | 0          | 111780000  | 117530000  | 126730000  |
| sp Q9Y6E BZW2    | sp Q9Y6E | 1 | 16 | 16 | 15 | 35  | 48.162 | 2773700000 | 2325300000 | 2595400000 | 2591700000 | 2833300000 | 2101600000 |
| sp Q9Y6G MRPL42  | sp Q9Y6G | 1 | 3  | 3  | 3  | 37  | 16.661 | 0          | 0          | 0          | 0          | 196700000  | 0          |
| sp Q9Y6G COMMD1  | sp Q9Y6G | 1 | 2  | 2  | 2  | 12  | 22.966 | 0          | 0          | 0          | 0          | 0          | 6005800    |
| sp Q9Y6G DYNC1LI | sp Q9Y6G | 1 | 13 | 13 | 12 | 32  | 56.578 | 985580000  | 945420000  | 1072100000 | 833430000  | 989870000  | 861230000  |
| sp Q9Y6H CHCHD2  | sp Q9Y6H | 2 | 3  | 3  | 3  | 31  | 15.512 | 1459700000 | 1032900000 | 1077800000 | 591560000  | 609850000  | 560300000  |
| sp Q9Y6I EPN1    | sp Q9Y6I | 2 | 6  | 6  | 6  | 16  | 60.293 | 270640000  | 283970000  | 298700000  | 261730000  | 280580000  | 303210000  |
| sp Q9Y6I TEX264  | sp Q9Y6I | 1 | 1  | 1  | 1  | 7.7 | 34.188 | 0          | 0          | 0          | 0          | 0          | 10396000   |
| sp Q9Y6K CEPT1   | sp Q9Y6K | 1 | 1  | 1  | 1  | 2.6 | 46.553 | 0          | 0          | 0          | 0          | 0          | 53406000   |
| sp Q9Y6K OAS3    | sp Q9Y6K | 1 | 6  | 6  | 6  | 9   | 121.17 | 221130000  | 270750000  | 315940000  | 411550000  | 297140000  | 203130000  |
| sp Q9Y6K IKBKG   | sp Q9Y6K | 1 | 5  | 5  | 5  | 16  | 48.197 | 230030000  | 209070000  | 214050000  | 0          | 272470000  | 187770000  |

|                   |          |   |    |    |    |     |        |           |           |           |           |           |           |
|-------------------|----------|---|----|----|----|-----|--------|-----------|-----------|-----------|-----------|-----------|-----------|
| sp Q9Y6M SLC30A1  | sp Q9Y6M | 1 | 5  | 5  | 5  | 18  | 55.299 | 526320000 | 586700000 | 308250000 | 540240000 | 597190000 | 645340000 |
| sp Q9Y6M SLC4A7   | sp Q9Y6M | 1 | 1  | 1  | 1  | 1.4 | 136.04 | 0         | 0         | 0         | 0         | 0         | 16348000  |
| sp Q9Y6M NDUFB9   | sp Q9Y6M | 1 | 3  | 3  | 3  | 18  | 21.831 | 0         | 0         | 300400000 | 0         | 0         | 0         |
| sp Q9Y6N SQOR     | sp Q9Y6N | 1 | 10 | 10 | 10 | 28  | 49.96  | 525770000 | 475000000 | 485640000 | 553330000 | 618280000 | 565350000 |
| sp Q9Y6N ROBO1    | sp Q9Y6N | 1 | 3  | 3  | 3  | 2.8 | 180.93 | 0         | 88841000  | 160870000 | 0         | 131720000 | 0         |
| sp Q9Y6Q CAPN6    | sp Q9Y6Q | 1 | 1  | 1  | 1  | 1.2 | 74.576 | 0         | 0         | 0         | 0         | 0         | 164440000 |
| sp Q9Y6V DDX49    | sp Q9Y6V | 1 | 2  | 2  | 2  | 8.1 | 54.226 | 0         | 0         | 0         | 0         | 0         | 100050000 |
| sp Q9Y6V WASF2    | sp Q9Y6V | 1 | 3  | 3  | 3  | 8   | 54.283 | 115390000 | 103600000 | 0         | 111590000 | 0         | 0         |
| sp Q9Y6X MAU2     | sp Q9Y6X | 1 | 1  | 1  | 1  | 3.1 | 69.081 | 0         | 0         | 0         | 0         | 0         | 14853000  |
| sp Q9Y6Y IVNS1AB1 | sp Q9Y6Y | 1 | 3  | 3  | 3  | 6.5 | 71.729 | 0         | 0         | 0         | 0         | 0         | 65422000  |
| sp Q9Y6Y SEC23IP  | sp Q9Y6Y | 1 | 14 | 14 | 14 | 17  | 111.08 | 649850000 | 945080000 | 624330000 | 759050000 | 740010000 | 801280000 |
